# Supplementary material for: Gene Function Hypotheses for the Campylobacter jejuni Glycome Generated by a Logic-Based Approach
Source: PubMed Central journal article supplement (PMC3546167; doi:10.1016/j.jmb.2012.10.014), 2013-01-09
Supplement: mmc1.pdf [file mmc1.pdf]

This README defines the Prolog data files used in the following paper:

Michael Sternberg, et. al. Gene function hypotheses for the *Campylobacter jejuni* glycome generated by a logic-based approach.

## DATA

----

The data used for learning are arranged in the following files.

(Note genes have the suffix "c" after their number which was, for brevity, omitted in the paper).

### background\_pl

The background knowledge for the machine learning which includes the general rules, working assumptions and the abductive learning settings for Progol 5.0.

### codes\_pl

Known gene functions represented by instances of the 'codes' predicate

### common\_pl

Common predicate declarations for genes and strains

### CPS\_pathway\_pl

The *C. jejuni* CPS pathway information compiled from KEGG and BioCyc augmented by some specific information about the *C. jejuni* capsul glycan structure that were extracted from publications.

### glycan\_structure\_pl

The *C. jejuni* CPS glycan structures. This includes the definition of `struct_next` which states that one glycan structure is related to another by the addition of a single chemical group

### mutants\_pl

The gene knock-out experiments for *C. jejuni* CPS. The data is mainly compiled from previously published data. The data is represented by instances of the 'knockout\_observable' predicate which states when a specific gene is knocked out this result causes a particular glycan structure to be the largest synthesised

### strains\_pl

The cross-strain genomic data for the CPS loci originate from an in-progress study in which 270 *C. jejuni* isolates were analysed by comparative phylogenomics (whole genome comparisons of bacteria using DNA microarrays, combined with Bayesian-based algorithms, to model the phylogeny), using a previously published method.

The data includes predicates 'absent' and 'occurs' which state that a particular gene is absent or present from a particular strain.

## MACHINE LEARNING USING PROGOL

-----

These files were prepared to be used with the Inductive Logic Programming (ILP) system Progol 5.0. The version of Progol used in this study can be downloaded from

<http://www.doc.ic.ac.uk/Campy>

The latest version of Progol is available from:

<http://www.doc.ic.ac.uk/~shm/Software/progol5.0/>

It is necessary to abduce the function of each gene in turn to obtain the independent compression values reported in the paper. As an example below we give the input to abduce the function of `cyj1416c` and the output obtained.

`learn_cj1416c_pl`

Example learning file for the reaction `cyj1416c` in the paper. This is an input file for Progol 5.0 which loads other files in this directory into Progol and does the learning.

`learn_cj1416c_out`

The output of running Progol 5.0 on the example file `learn_cj1416c.pl`

After compiling the source file, Progol 5.0 can be used to run the example learning file described above. Under UNIX, to run Progol, rename each file as `.pl` so for example, `codes_pl.txt` should be renamed as `codes.pl`

To initiate the learning, type the following at the command line:

```
$ progol learn_cj1416c.pl
```

Then you should obtain the same output as the one in `learn_cj1416c_out`.

## VISUALISATION

-----

We developed a portal-based workbench, WIBL (Workbench for Integrative Biological Learning) to browse the glycan structure, metabolic and protein-protein interaction networks as well as the underlying Prolog. WIBL is hosted at

<http://www.sbg.bio.ic.ac.uk/wibl> (username `guest`, project `campy`).

Lesk V, Taubert J, Rawlings C, Dunbar S, Muggleton S (2011)

WIBL: Workbench for Integrative Biological Learning.

Journal of integrative bioinformatics 8: 156

```

% FILE BACKGROUND_PL
%%%%%%%%%%%%%%%%%%%%%%%%%%%%%%%%%%%%%%%%%%%%%%%%%%%%%%%%%%%%%%%%%%%%%%%%
% A logic program for modelling genotype-phenotype
% relation in Campylobacter jejuni. This model
% integrates data from different sources, i.e. mutants
% data from gene knock-out experiments, cross-strain
% genomic data, glycan structures and pathways
% information compiled from KEGG and BioCyc
%
% N.B. This model was prepared to be used with Progol 5.0

% Abductive learning settings for Progol 5.0

:- modeh(1, codes(#any, #any))?

:- observable(knockout_observable/2)?

% The following rule models the effect of knocking-out a gene in terms
% of the absence of a glycan structure and the implications for assigning
% a gene to a specific reaction

knockout_observable(Gene, Observable):-
    unassigned_gene(Gene),
    struct_observable(Prs_Struct, Observable),
    struct_next(Prs_Struct, Abs_Struct),
    path3(R, Prs_Struct, Abs_Struct),
    unassigned_reaction(R),
    codes(Gene, R).

% The working assumption that if a pair of genes are present in two strains
% which share the same serotype, they both perform neighbour reactions in a
% path which synthesises a particular glycan

occurs(Strain1, Gene):-
    codes(Gene, R1),
    neighbour_reaction(R1, R2),
    codes(G2, R2),
    occurs0(Strain2, G2),
    have_same_serotype(Strain1, Strain2), !.

have_same_serotype(Strain1, Strain2):-
    Strain1 \= Strain2,
    strain_has_penner_serotype(Strain1, Serotype),
    strain_has_penner_serotype(Strain2, Serotype), !.

%%%%%%%%%%%%%%%%%%%%%%%%%%%%%%%%%%%%%%%%%%%%%%%%%%%%%%%%%%%%%%%%%%%%%%%%
%%%%%%%%%%%%%%%%%%%%%%%%%%%%%%%%%%%%%%%%%%%%%%%%%%%%%%%%%%%%%%%%%%%%%%%%
% The definition of pathways in terms of steps of sequential reactions

path3(R, X, Y):-

```

reaction3(R,X,Y).

path3(R,X,Y):-

reaction3(R0,X,Y),  
reaction3(R0,Z,Y),  
not(X=Z),  
leading\_to(R,Z).

leading\_to(R,X):-

reaction3(R,Z,X).

leading\_to(R,X):-

reaction3(\_,Z,X),  
leading\_to(R,Z).

reaction3(R,X,Y):-

reaction2(R,X,Y).

reaction2(R,X,Y):-

reaction(D,O,R,X,Y,Dir).

%%%%%%%%%%%%%%%%%%%%%%%%%%%%%%%%%%%%%%%%%%%%%%%%%%%%%%%%%%%%%%%%%%%%%%%%  
%%%%%%%%%%%%%%%%%%%%%%%%%%%%%%%%%%%%%%%%%%%%%%%%%%%%%%%%%%%%%%%%%%%%%%%%

% Integrity constraints

:- codes(Gene, Reaction1),  
codes(Gene, Reaction2),  
not(Reaction1 = Reaction2).

:- codes(Gene1, Reaction),  
codes(Gene2, Reaction),  
not(chain(Reaction)),  
not(Gene1 = Gene2).

```
% FILE CODES_PL
```

```
% Known gene functions represented by instances of the 'codes' predicate
```

```
codes(cj1421c,capsule_ngro36a).
```

```
codes(cj1422c,capsule_ngro21a).
```

```
codes(cj1426c,capsule_ngro21c).
```

```
codes(cj1430c,capsule_hep5).
```

```
codes(cj1431c,capsule_ngro1c).
```

```
codes(cj1439c,capsule_pre_pre_galfnac).
```

```
codes(cj1441c,capsule_pre_pre_glca).
```

% FILE COMMON\_PL

% Common predicate declarations for genes and strains

gene(cj1413c).  
gene(cj1414c).  
gene(cj1415c).  
gene(cj1416c).  
gene(cj1417c).  
gene(cj1418c).  
gene(cj1419c).  
gene(cj1420c).  
gene(cj1421c).  
gene(cj1422c).  
gene(cj1423c).  
gene(cj1424c).  
gene(cj1425c).  
gene(cj1426c).  
gene(cj1427c).  
gene(cj1428c).  
gene(cj1429c).  
gene(cj1430c).  
gene(cj1431c).  
gene(cj1432c).  
gene(cj1433c).  
gene(cj1434c).  
gene(cj1435c).  
gene(cj1436c).  
gene(cj1437c).  
gene(cj1438c).  
gene(cj1439c).  
gene(cj1440c).  
gene(cj1441c).  
gene(cj1442c).  
gene(cj1443c).  
gene(cj1444c).  
gene(cj1445c).  
gene(cj1447c).  
gene(cj1448c).

strain(strain176\_83).  
strain(strain81116).  
strain(strain81\_176).  
strain(strainBeach1771).  
strain(strainBeach1772).  
strain(strainBeach1773).  
strain(strainBeach1791).  
strain(strainBeach1792).  
strain(strainBeach1793).  
strain(strainBeach28766X).  
strain(strainBeach28770).  
strain(strainBovine27).  
strain(strainBovine37).  
strain(strainBovineC115).

strain(strainBovineC119).  
strain(strainBovineC123).  
strain(strainBovineC156).  
strain(strainBovineC180).  
strain(strainBovineC30).  
strain(strainBovinevineine13305).  
strain(strainCalf2).  
strain(strainCalf3).  
strain(strainCalf5).  
strain(strainCamel0014).  
strain(strainCamel0029).  
strain(strainCamel0032).  
strain(strainCamel0037).  
strain(strainCamel0049).  
strain(strainCamel0062).  
strain(strainCamel0064).  
strain(strainCamel0079).  
strain(strainCamel0086).  
strain(strainCattel11).  
strain(strainCattle10).  
strain(strainCattle8\_O).  
strain(strainCG8486).  
strain(strainChicken11848).  
strain(strainChicken11919).  
strain(strainChicken11973).  
strain(strainChicken12196).  
strain(strainChicken12567).  
strain(strainChicken13713).  
strain(strainChicken40209).  
strain(strainChicken40267).  
strain(strainChicken47693).  
strain(strainChicken59214).  
strain(strainChicken91B1).  
strain(strainChicken9B39).  
strain(strainChickenicken11818).  
strain(strainChickenicken11848).  
strain(strainChickenicken11856).  
strain(strainChickenicken11919).  
strain(strainChickenicken11973).  
strain(strainChickenicken11974).  
strain(strainChickenicken12450).  
strain(strainChickenicken12487).  
strain(strainChickenicken12567).  
strain(strainChickenicken12912).  
strain(strainChickenicken13040).  
strain(strainChickenicken13082).  
strain(strainChickenicken13249).  
strain(strainChickenicken13411).  
strain(strainChickenicken13713).  
strain(strainCjejuni11168).  
strain(strainCjejuniRM1221).  
strain(strainClinical18836).  
strain(strainClinical30280).  
strain(strainClinical30328).

strain(strainClinical31481).  
strain(strainClinical31485).  
strain(strainClinical32787).  
strain(strainClinical32799).  
strain(strainClinical33084).  
strain(strainClinical33106).  
strain(strainClinical34007).  
strain(strainClinical35424).  
strain(strainClinical35535).  
strain(strainClinical35799).  
strain(strainClinical36069).  
strain(strainClinical36439).  
strain(strainClinical36860).  
strain(strainClinical36952).  
strain(strainClinical37537).  
strain(strainClinical38553).  
strain(strainClinical38762).  
strain(strainClinical38857).  
strain(strainClinical39828).  
strain(strainClinical40671).  
strain(strainClinical40917).  
strain(strainClinical41651).  
strain(strainClinical42724).  
strain(strainClinical43205).  
strain(strainClinical43983).  
strain(strainClinical44119).  
strain(strainClinical44811).  
strain(strainClinical44933).  
strain(strainClinical44958).  
strain(strainClinical45557).  
strain(strainClinical45631).  
strain(strainClinical47886).  
strain(strainClinical47939).  
strain(strainClinical48612).  
strain(strainClinical52331).  
strain(strainClinical52368).  
strain(strainClinical52471).  
strain(strainClinical53250).  
strain(strainClinical55320).  
strain(strainClinical55703).  
strain(strainClinical56281).  
strain(strainClinical56282).  
strain(strainClinical56519).  
strain(strainClinical56832).  
strain(strainClinical58473).  
strain(strainClinical59364).  
strain(strainClinical59424).  
strain(strainClinical62914).  
strain(strainClinical63326).  
strain(strainClinical64555).  
strain(strainClinical81116).  
strain(strainClinicalF1).  
strain(strainClinicalF2).  
strain(strainClinicalF3).



strain(strainClinicalG1).  
strain(strainClinicalG2).  
strain(strainClinicalG3).  
strain(strainClinicalG4).  
strain(strainClinicalclinical15168).  
strain(strainClinicall31467).  
strain(strainClinicall38556).  
strain(strainClinicall39182).  
strain(strainClinicalM1).  
strain(strainG1).  
strain(strainGoose126).  
strain(strainGoose222).  
strain(strainGoose66).  
strain(strainGoose86).  
strain(strainHi40500471).  
strain(strainHi40520410).  
strain(strainHi40540310).  
strain(strainHi40540311).  
strain(strainHi40620293).  
strain(strainHi40620296).  
strain(strainHi40620300).  
strain(strainHi40680224).  
strain(strainHi40800231).  
strain(strainHi40840318).  
strain(strainHi40840324).  
strain(strainHi40900388).  
strain(strainHi40980306).  
strain(strainHi41000246).  
strain(strainHi41020285).  
strain(strainHi41040340).  
strain(strainHi41080433).  
strain(strainHi41080434).  
strain(strainHi41100305).  
strain(strainHi41120166).  
strain(strainHi41120167).  
strain(strainHi41160244).  
strain(strainHi41220381).  
strain(strainHi41220382).  
strain(strainHi41300251).  
strain(strainHi41300252).  
strain(strainHi41300259).  
strain(strainHi41360174).  
strain(strainHi41380304).  
strain(strainHi41500294).  
strain(strainHi41720262).  
strain(strainHi41760156).  
strain(strainHi41780227).  
strain(strainHi41780229).  
strain(strainHi41800342).  
strain(strainHi41840334).  
strain(strainHi41840336).  
strain(strainHi41880318).  
strain(strainHi42080176).  
strain(strainHi43240534).

strain(strainHi43240536).  
strain(strainHi43320472rept).  
strain(strainHi43320475).  
strain(strainHi43340233).  
strain(strainHi43380463).  
strain(strainHi43400514).  
strain(strainHi43480582).  
strain(strainHi43500234).  
strain(strainHi43580563).  
strain(strainHi43700324).  
strain(strainHi50520408).  
strain(strainHi80512).  
strain(strainHi80530).  
strain(strainHi80531).  
strain(strainHi80536).  
strain(strainHi80547).  
strain(strainHi80552).  
strain(strainHi80554).  
strain(strainHi80563).  
strain(strainHi80583).  
strain(strainHi80584).  
strain(strainHi80586).  
strain(strainHi80614).  
strain(strainHi80646).  
strain(strainHi80650).  
strain(strainHi80659).  
strain(strainHi80675).  
strain(strainHi80809).  
strain(strainHi80838).  
strain(strainHi80841).  
strain(strainHi80864).  
strain(strainHi80866).  
strain(strainHi80876).  
strain(strainHi80884).  
strain(strainHi80885).  
strain(strainHi80889).  
strain(strainHi80896).  
strain(strainHi80901).  
strain(strainHi80908).  
strain(strainHi80935).  
strain(strainHi80938).  
strain(strainHi80939).  
strain(strainHi80983).  
strain(strainHi80986).  
strain(strainHi81003).  
strain(strainHi81005).  
strain(strainHi81006).  
strain(strainHi81006rept).  
strain(strainHi81018).  
strain(strainHi81035).  
strain(strainHi81036).  
strain(strainHi81040).  
strain(strainHi81049).  
strain(strainHi81061).

strain(strainHi81062rep).  
strain(strainHi81109).  
strain(strainHi81121).  
strain(strainHi81132).  
strain(strainHi81135).  
strain(strainHi81139).  
strain(strainHi81143).  
strain(strainHi81180).  
strain(strainHi81181).  
strain(strainHi81205).  
strain(strainHi81206).  
strain(strainHi81214).  
strain(strainHi81239).  
strain(strainHi81266).  
strain(strainHi81268).  
strain(strainHi81270).  
strain(strainHi81276).  
strain(strainHi81289).  
strain(strainHi81290).  
strain(strainHi81292).  
strain(strainHi81311).  
strain(strainHi81335).  
strain(strainHi81338).  
strain(strainHi81342).  
strain(strainHi81357).  
strain(strainHi81363).  
strain(strainHi81371).  
strain(strainLamb11).  
strain(strainMilk1398).  
strain(strainMilk1403).  
strain(strainMilk1899\_BA).  
strain(strainMilk1899\_BC).  
strain(strainNCTC12517).  
strain(strainOvine12241).  
strain(strainOvine12481).  
strain(strainOvineC55).  
strain(strainOvineSM4).  
strain(strainOvineSM6).  
strain(strainOvineSM8).  
strain(strainRM1221).  
strain(strainSheep11).  
strain(strainSheep18).  
strain(strainSheep2).  
strain(strainSheep8).  
strain(strainSheepSM7).  
strain(strainSheepSM9).  
strain(strainStarling86857).  
strain(strainTurkey4).  
strain(strainTurkey8).  
strain(strainWaterS5).  
strain(strainWaterSA5).

penner\_serogroup(serogroupA).  
penner\_serogroup(serogroupB).

penner\_serogroup(serogroupD).  
penner\_serogroup(serogroupE).  
penner\_serogroup(serogroupF).  
penner\_serogroup(serogroupK).  
penner\_serogroup(serogroupN).  
penner\_serogroup(serogroupO).  
penner\_serogroup(serogroupP).  
penner\_serogroup(serogroupR).  
penner\_serogroup(serogroupS).  
penner\_serogroup(serogroupU).  
penner\_serogroup(serogroupY).  
penner\_serogroup(serogroupZ2).  
penner\_serogroup(serogroupZ6).

penner\_serotype(hs1).  
penner\_serotype(hs12).  
penner\_serotype(hs13).  
penner\_serotype(hs16).  
penner\_serotype(hs18).  
penner\_serotype(hs19).  
penner\_serotype(hs2).  
penner\_serotype(hs21).  
penner\_serotype(hs23).  
penner\_serotype(hs2336).  
penner\_serotype(hs27).  
penner\_serotype(hs31).  
penner\_serotype(hs35).  
penner\_serotype(hs37).  
penner\_serotype(hs4).  
penner\_serotype(hs41).  
penner\_serotype(hs42).  
penner\_serotype(hs44).  
penner\_serotype(hs5).  
penner\_serotype(hs50).  
penner\_serotype(hs53).  
penner\_serotype(hs55).  
penner\_serotype(hs6).  
penner\_serotype(hs60).  
penner\_serotype(hs67).

clade(cladeA1).  
clade(cladeA3).  
clade(cladeB1).  
clade(cladeB2).  
clade(cladeB3).  
clade(cladeB4).

superclade(supercladeA).  
superclade(supercladeB).

strain\_has\_penner\_serotype(strain176\_83,hs41).  
strain\_has\_penner\_serotype(strain81116,hs6).  
strain\_has\_penner\_serotype(strain81\_176,hs2336).  
strain\_has\_penner\_serotype(strainBeach1771,hs55).

strain\_has\_penner\_serotype(strainBeach1791,hs2).  
strain\_has\_penner\_serotype(strainBeach1793,hs5).  
strain\_has\_penner\_serotype(strainBovinevineine13305,hs50).  
strain\_has\_penner\_serotype(strainCG8486,hs4).  
strain\_has\_penner\_serotype(strainChicken11848,hs2).  
strain\_has\_penner\_serotype(strainChicken11919,hs2).  
strain\_has\_penner\_serotype(strainChicken11973,hs2).  
strain\_has\_penner\_serotype(strainChicken12196,hs50).  
strain\_has\_penner\_serotype(strainChicken12567,hs2).  
strain\_has\_penner\_serotype(strainChicken13713,hs2).  
strain\_has\_penner\_serotype(strainChicken40209,hs5).  
strain\_has\_penner\_serotype(strainChicken47693,hs27).  
strain\_has\_penner\_serotype(strainChickenicken11818,hs50).  
strain\_has\_penner\_serotype(strainChickenicken11856,hs50).  
strain\_has\_penner\_serotype(strainChickenicken11974,hs44).  
strain\_has\_penner\_serotype(strainChickenicken12450,hs50).  
strain\_has\_penner\_serotype(strainChickenicken12487,hs50).  
strain\_has\_penner\_serotype(strainChickenicken12912,hs50).  
strain\_has\_penner\_serotype(strainChickenicken13040,hs50).  
strain\_has\_penner\_serotype(strainChickenicken13082,hs50).  
strain\_has\_penner\_serotype(strainChickenicken13249,hs44).  
strain\_has\_penner\_serotype(strainChickenicken13411,hs44).  
strain\_has\_penner\_serotype(strainCjejuniRM1221,hs53).  
strain\_has\_penner\_serotype(strainClinical18836,hs19).  
strain\_has\_penner\_serotype(strainClinical30280,hs16).  
strain\_has\_penner\_serotype(strainClinical30328,hs16).  
strain\_has\_penner\_serotype(strainClinical31481,hs37).  
strain\_has\_penner\_serotype(strainClinical32787,hs18).  
strain\_has\_penner\_serotype(strainClinical32799,hs50).  
strain\_has\_penner\_serotype(strainClinical33084,hs35).  
strain\_has\_penner\_serotype(strainClinical33106,hs4).  
strain\_has\_penner\_serotype(strainClinical34007,hs18).  
strain\_has\_penner\_serotype(strainClinical36069,hs5).  
strain\_has\_penner\_serotype(strainClinical36439,hs12).  
strain\_has\_penner\_serotype(strainClinical36860,hs21).  
strain\_has\_penner\_serotype(strainClinical38553,hs5).  
strain\_has\_penner\_serotype(strainClinical38762,hs18).  
strain\_has\_penner\_serotype(strainClinical38857,hs23).  
strain\_has\_penner\_serotype(strainClinical39828,hs42).  
strain\_has\_penner\_serotype(strainClinical40671,hs50).  
strain\_has\_penner\_serotype(strainClinical40917,hs21).  
strain\_has\_penner\_serotype(strainClinical41651,hs16).  
strain\_has\_penner\_serotype(strainClinical43205,hs2).  
strain\_has\_penner\_serotype(strainClinical43983,hs50).  
strain\_has\_penner\_serotype(strainClinical44119,hs18).  
strain\_has\_penner\_serotype(strainClinical44811,hs2).  
strain\_has\_penner\_serotype(strainClinical44933,hs13).  
strain\_has\_penner\_serotype(strainClinical44958,hs50).  
strain\_has\_penner\_serotype(strainClinical45557,hs60).  
strain\_has\_penner\_serotype(strainClinical45631,hs13).  
strain\_has\_penner\_serotype(strainClinical47939,hs67).  
strain\_has\_penner\_serotype(strainClinical48612,hs2).  
strain\_has\_penner\_serotype(strainClinical52331,hs50).  
strain\_has\_penner\_serotype(strainClinical53250,hs60).

strain\_has\_penner\_serotype(strainClinical55320,hs13).  
strain\_has\_penner\_serotype(strainClinical55703,hs13).  
strain\_has\_penner\_serotype(strainClinical56281,hs50).  
strain\_has\_penner\_serotype(strainClinical56282,hs50).  
strain\_has\_penner\_serotype(strainClinical56519,hs12).  
strain\_has\_penner\_serotype(strainClinical56832,hs50).  
strain\_has\_penner\_serotype(strainClinical58473,hs2).  
strain\_has\_penner\_serotype(strainClinical59364,hs31).  
strain\_has\_penner\_serotype(strainClinical59424,hs31).  
strain\_has\_penner\_serotype(strainClinical63326,hs31).  
strain\_has\_penner\_serotype(strainClinical64555,hs31).  
strain\_has\_penner\_serotype(strainClinical81116,hs6).  
strain\_has\_penner\_serotype(strainClinicalG1,hs1).  
strain\_has\_penner\_serotype(strainClinicalG3,hs1).  
strain\_has\_penner\_serotype(strainClinicalical15168,hs19).  
strain\_has\_penner\_serotype(strainClinicall31467,hs18).  
strain\_has\_penner\_serotype(strainClinicall38556,hs13).  
strain\_has\_penner\_serotype(strainClinicall39182,hs13).  
strain\_has\_penner\_serotype(strainClinicalM1,hs21).  
strain\_has\_penner\_serotype(strainG1,hs1).  
strain\_has\_penner\_serotype(strainNCTC12517,hs19).  
strain\_has\_penner\_serotype(strainOvine12241,hs50).  
strain\_has\_penner\_serotype(strainOvine12481,hs50).  
strain\_has\_penner\_serotype(strainRM1221,hs53).

strain\_has\_penner\_serogroup(strain176\_83,serogroupZ2).  
strain\_has\_penner\_serogroup(strain81116,serogroupF).  
strain\_has\_penner\_serogroup(strain81\_176,serogroupR).  
strain\_has\_penner\_serogroup(strainBeach1771,serogroupZ6).  
strain\_has\_penner\_serogroup(strainBeach1791,serogroupB).  
strain\_has\_penner\_serogroup(strainBeach1793,serogroupE).  
strain\_has\_penner\_serogroup(strainBovinevineine13305,serogroupD).  
strain\_has\_penner\_serogroup(strainCG8486,serogroupD).  
strain\_has\_penner\_serogroup(strainChicken11848,serogroupB).  
strain\_has\_penner\_serogroup(strainChicken11919,serogroupB).  
strain\_has\_penner\_serogroup(strainChicken11973,serogroupB).  
strain\_has\_penner\_serogroup(strainChicken12196,serogroupD).  
strain\_has\_penner\_serogroup(strainChicken12567,serogroupB).  
strain\_has\_penner\_serogroup(strainChicken13713,serogroupB).  
strain\_has\_penner\_serogroup(strainChicken40209,serogroupE).  
strain\_has\_penner\_serogroup(strainChicken47693,serogroupS).  
strain\_has\_penner\_serogroup(strainChickenicken11818,serogroupD).  
strain\_has\_penner\_serogroup(strainChickenicken11856,serogroupD).  
strain\_has\_penner\_serogroup(strainChickenicken11974,serogroupA).  
strain\_has\_penner\_serogroup(strainChickenicken12450,serogroupD).  
strain\_has\_penner\_serogroup(strainChickenicken12487,serogroupD).  
strain\_has\_penner\_serogroup(strainChickenicken12912,serogroupD).  
strain\_has\_penner\_serogroup(strainChickenicken13040,serogroupD).  
strain\_has\_penner\_serogroup(strainChickenicken13082,serogroupD).  
strain\_has\_penner\_serogroup(strainChickenicken13249,serogroupA).  
strain\_has\_penner\_serogroup(strainChickenicken13411,serogroupA).  
strain\_has\_penner\_serogroup(strainCjejuniRM1221,serogroupR).  
strain\_has\_penner\_serogroup(strainClinical18836,serogroupO).  
strain\_has\_penner\_serogroup(strainClinical30280,serogroupD).

strain\_has\_penner\_serogroup(strainClinical30328,serogroupD).  
strain\_has\_penner\_serogroup(strainClinical31481,serogroupY).  
strain\_has\_penner\_serogroup(strainClinical32787,serogroupN).  
strain\_has\_penner\_serogroup(strainClinical32799,serogroupD).  
strain\_has\_penner\_serogroup(strainClinical33106,serogroupD).  
strain\_has\_penner\_serogroup(strainClinical34007,serogroupN).  
strain\_has\_penner\_serogroup(strainClinical36069,serogroupE).  
strain\_has\_penner\_serogroup(strainClinical36439,serogroupK).  
strain\_has\_penner\_serogroup(strainClinical36860,serogroupP).  
strain\_has\_penner\_serogroup(strainClinical38553,serogroupE).  
strain\_has\_penner\_serogroup(strainClinical38762,serogroupN).  
strain\_has\_penner\_serogroup(strainClinical38857,serogroupR).  
strain\_has\_penner\_serogroup(strainClinical40671,serogroupD).  
strain\_has\_penner\_serogroup(strainClinical40917,serogroupP).  
strain\_has\_penner\_serogroup(strainClinical41651,serogroupD).  
strain\_has\_penner\_serogroup(strainClinical43205,serogroupB).  
strain\_has\_penner\_serogroup(strainClinical43983,serogroupD).  
strain\_has\_penner\_serogroup(strainClinical44119,serogroupN).  
strain\_has\_penner\_serogroup(strainClinical44811,serogroupB).  
strain\_has\_penner\_serogroup(strainClinical44933,serogroupD).  
strain\_has\_penner\_serogroup(strainClinical44958,serogroupD).  
strain\_has\_penner\_serogroup(strainClinical45631,serogroupD).  
strain\_has\_penner\_serogroup(strainClinical48612,serogroupB).  
strain\_has\_penner\_serogroup(strainClinical52331,serogroupD).  
strain\_has\_penner\_serogroup(strainClinical55320,serogroupD).  
strain\_has\_penner\_serogroup(strainClinical55703,serogroupD).  
strain\_has\_penner\_serogroup(strainClinical56281,serogroupD).  
strain\_has\_penner\_serogroup(strainClinical56282,serogroupD).  
strain\_has\_penner\_serogroup(strainClinical56519,serogroupK).  
strain\_has\_penner\_serogroup(strainClinical56832,serogroupD).  
strain\_has\_penner\_serogroup(strainClinical58473,serogroupB).  
strain\_has\_penner\_serogroup(strainClinical59364,serogroupU).  
strain\_has\_penner\_serogroup(strainClinical59424,serogroupU).  
strain\_has\_penner\_serogroup(strainClinical63326,serogroupU).  
strain\_has\_penner\_serogroup(strainClinical64555,serogroupU).  
strain\_has\_penner\_serogroup(strainClinical81116,serogroupF).  
strain\_has\_penner\_serogroup(strainClinicalG1,serogroupA).  
strain\_has\_penner\_serogroup(strainClinicalG3,serogroupA).  
strain\_has\_penner\_serogroup(strainClinicalclinical15168,serogroupO).  
strain\_has\_penner\_serogroup(strainClinicall31467,serogroupN).  
strain\_has\_penner\_serogroup(strainClinicall38556,serogroupD).  
strain\_has\_penner\_serogroup(strainClinicall39182,serogroupD).  
strain\_has\_penner\_serogroup(strainClinicalM1,serogroupP).  
strain\_has\_penner\_serogroup(strainG1,serogroupA).  
strain\_has\_penner\_serogroup(strainNCTC12517,serogroupO).  
strain\_has\_penner\_serogroup(strainOvine12241,serogroupD).  
strain\_has\_penner\_serogroup(strainOvine12481,serogroupD).  
strain\_has\_penner\_serogroup(strainRM1221,serogroupR).

strain\_has\_clade(strainBeach1771,cladeB4).  
strain\_has\_clade(strainBeach1772,cladeB4).  
strain\_has\_clade(strainBeach1773,cladeB4).  
strain\_has\_clade(strainBovinevineine13305,cladeB4).  
strain\_has\_clade(strainCattle10,cladeB4).

strain\_has\_clade(strainChicken47693,cladeB4).  
strain\_has\_clade(strainClinical35799,cladeB4).  
strain\_has\_clade(strainClinical36439,cladeB4).  
strain\_has\_clade(strainClinical38553,cladeB1).  
strain\_has\_clade(strainClinical40671,cladeB4).  
strain\_has\_clade(strainClinical43205,cladeB3).  
strain\_has\_clade(strainClinical43983,cladeB2).  
strain\_has\_clade(strainClinical53250,cladeB4).  
strain\_has\_clade(strainClinical55320,cladeB2).  
strain\_has\_clade(strainClinical56281,cladeA1).  
strain\_has\_clade(strainClinical56519,cladeB4).  
strain\_has\_clade(strainGoose126,cladeB4).  
strain\_has\_clade(strainGoose222,cladeB4).  
strain\_has\_clade(strainHi40540310,cladeA3).  
strain\_has\_clade(strainHi40680224,cladeB1).  
strain\_has\_clade(strainHi40900388,cladeB1).  
strain\_has\_clade(strainHi41040340,cladeB3).  
strain\_has\_clade(strainHi41100305,cladeB3).  
strain\_has\_clade(strainHi41120166,cladeA3).  
strain\_has\_clade(strainHi41220381,cladeA3).  
strain\_has\_clade(strainHi41220382,cladeA3).  
strain\_has\_clade(strainHi41500294,cladeB4).  
strain\_has\_clade(strainHi43400514,cladeB4).  
strain\_has\_clade(strainHi43580563,cladeB3).  
strain\_has\_clade(strainHi43700324,cladeB4).  
strain\_has\_clade(strainHi50520408,cladeB4).  
strain\_has\_clade(strainHi80512,cladeB1).  
strain\_has\_clade(strainHi80659,cladeB1).  
strain\_has\_clade(strainHi80675,cladeB1).  
strain\_has\_clade(strainHi80841,cladeB3).  
strain\_has\_clade(strainHi80866,cladeB1).  
strain\_has\_clade(strainHi80884,cladeB3).  
strain\_has\_clade(strainHi80908,cladeB4).  
strain\_has\_clade(strainHi81005,cladeB4).  
strain\_has\_clade(strainHi81036,cladeB3).  
strain\_has\_clade(strainHi81049,cladeB4).  
strain\_has\_clade(strainHi81061,cladeB4).  
strain\_has\_clade(strainHi81143,cladeB1).  
strain\_has\_clade(strainHi81181,cladeB4).  
strain\_has\_clade(strainHi81239,cladeB1).  
strain\_has\_clade(strainHi81311,cladeB3).  
strain\_has\_clade(strainHi81338,cladeB1).  
strain\_has\_clade(strainHi81371,cladeB1).  
strain\_has\_clade(strainOvine12241,cladeB4).  
strain\_has\_clade(strainOvine12481,cladeB4).  
strain\_has\_clade(strainSheepSM7,cladeB4).  
strain\_has\_clade(strainStarling86857,cladeB4).  
strain\_has\_clade(strainWaterSA5,cladeB4).

strain\_has\_superclade(strainBeach1771,supercladeB).  
strain\_has\_superclade(strainBeach1772,supercladeB).  
strain\_has\_superclade(strainBeach1773,supercladeB).  
strain\_has\_superclade(strainBeach1791,supercladeA).  
strain\_has\_superclade(strainBeach1792,supercladeB).



strain\_has\_superclade(strainBeach1793,supercladeB).  
strain\_has\_superclade(strainBeach28766X,supercladeA).  
strain\_has\_superclade(strainBeach28770,supercladeA).  
strain\_has\_superclade(strainBovine27,supercladeA).  
strain\_has\_superclade(strainBovine37,supercladeA).  
strain\_has\_superclade(strainBovineC115,supercladeA).  
strain\_has\_superclade(strainBovineC119,supercladeA).  
strain\_has\_superclade(strainBovineC123,supercladeA).  
strain\_has\_superclade(strainBovineC156,supercladeA).  
strain\_has\_superclade(strainBovineC180,supercladeA).  
strain\_has\_superclade(strainBovineC30,supercladeA).  
strain\_has\_superclade(strainBovinevineine13305,supercladeB).  
strain\_has\_superclade(strainCalf2,supercladeB).  
strain\_has\_superclade(strainCalf3,supercladeB).  
strain\_has\_superclade(strainCalf5,supercladeA).  
strain\_has\_superclade(strainCamel0014,supercladeA).  
strain\_has\_superclade(strainCamel0029,supercladeA).  
strain\_has\_superclade(strainCamel0032,supercladeA).  
strain\_has\_superclade(strainCamel0037,supercladeA).  
strain\_has\_superclade(strainCamel0049,supercladeA).  
strain\_has\_superclade(strainCamel0062,supercladeA).  
strain\_has\_superclade(strainCamel0064,supercladeA).  
strain\_has\_superclade(strainCamel0079,supercladeA).  
strain\_has\_superclade(strainCamel0086,supercladeA).  
strain\_has\_superclade(strainCattel11,supercladeA).  
strain\_has\_superclade(strainCattle10,supercladeB).  
strain\_has\_superclade(strainCattle8\_O,supercladeA).  
strain\_has\_superclade(strainChicken12196,supercladeA).  
strain\_has\_superclade(strainChicken40209,supercladeA).  
strain\_has\_superclade(strainChicken40267,supercladeA).  
strain\_has\_superclade(strainChicken47693,supercladeB).  
strain\_has\_superclade(strainChicken59214,supercladeA).  
strain\_has\_superclade(strainChicken91B1,supercladeA).  
strain\_has\_superclade(strainChicken9B39,supercladeA).  
strain\_has\_superclade(strainChickenicken11818,supercladeA).  
strain\_has\_superclade(strainChickenicken11848,supercladeA).  
strain\_has\_superclade(strainChickenicken11856,supercladeA).  
strain\_has\_superclade(strainChickenicken11919,supercladeA).  
strain\_has\_superclade(strainChickenicken11973,supercladeA).  
strain\_has\_superclade(strainChickenicken11974,supercladeA).  
strain\_has\_superclade(strainChickenicken12450,supercladeA).  
strain\_has\_superclade(strainChickenicken12487,supercladeA).  
strain\_has\_superclade(strainChickenicken12567,supercladeA).  
strain\_has\_superclade(strainChickenicken12912,supercladeA).  
strain\_has\_superclade(strainChickenicken13040,supercladeA).  
strain\_has\_superclade(strainChickenicken13082,supercladeA).  
strain\_has\_superclade(strainChickenicken13249,supercladeA).  
strain\_has\_superclade(strainChickenicken13411,supercladeA).  
strain\_has\_superclade(strainChickenicken13713,supercladeA).  
strain\_has\_superclade(strainCjejuni11168,supercladeA).  
strain\_has\_superclade(strainCjejuniRM1221,supercladeB).  
strain\_has\_superclade(strainClinical18836,supercladeB).  
strain\_has\_superclade(strainClinical30280,supercladeA).  
strain\_has\_superclade(strainClinical30328,supercladeA).

strain\_has\_superclade(strainClinical31481,supercladeB).  
strain\_has\_superclade(strainClinical31485,supercladeA).  
strain\_has\_superclade(strainClinical32787,supercladeB).  
strain\_has\_superclade(strainClinical32799,supercladeA).  
strain\_has\_superclade(strainClinical33084,supercladeB).  
strain\_has\_superclade(strainClinical33106,supercladeB).  
strain\_has\_superclade(strainClinical34007,supercladeB).  
strain\_has\_superclade(strainClinical35424,supercladeB).  
strain\_has\_superclade(strainClinical35535,supercladeA).  
strain\_has\_superclade(strainClinical35799,supercladeB).  
strain\_has\_superclade(strainClinical36069,supercladeB).  
strain\_has\_superclade(strainClinical36439,supercladeB).  
strain\_has\_superclade(strainClinical36860,supercladeB).  
strain\_has\_superclade(strainClinical36952,supercladeA).  
strain\_has\_superclade(strainClinical37537,supercladeA).  
strain\_has\_superclade(strainClinical38553,supercladeB).  
strain\_has\_superclade(strainClinical38762,supercladeB).  
strain\_has\_superclade(strainClinical38857,supercladeB).  
strain\_has\_superclade(strainClinical39828,supercladeA).  
strain\_has\_superclade(strainClinical40671,supercladeB).  
strain\_has\_superclade(strainClinical40917,supercladeB).  
strain\_has\_superclade(strainClinical41651,supercladeA).  
strain\_has\_superclade(strainClinical42724,supercladeB).  
strain\_has\_superclade(strainClinical43205,supercladeB).  
strain\_has\_superclade(strainClinical43983,supercladeB).  
strain\_has\_superclade(strainClinical44119,supercladeB).  
strain\_has\_superclade(strainClinical44811,supercladeA).  
strain\_has\_superclade(strainClinical44933,supercladeB).  
strain\_has\_superclade(strainClinical44958,supercladeA).  
strain\_has\_superclade(strainClinical45557,supercladeA).  
strain\_has\_superclade(strainClinical45631,supercladeB).  
strain\_has\_superclade(strainClinical47886,supercladeA).  
strain\_has\_superclade(strainClinical47939,supercladeB).  
strain\_has\_superclade(strainClinical48612,supercladeA).  
strain\_has\_superclade(strainClinical52331,supercladeA).  
strain\_has\_superclade(strainClinical52368,supercladeB).  
strain\_has\_superclade(strainClinical52471,supercladeB).  
strain\_has\_superclade(strainClinical53250,supercladeB).  
strain\_has\_superclade(strainClinical55320,supercladeB).  
strain\_has\_superclade(strainClinical55703,supercladeA).  
strain\_has\_superclade(strainClinical56281,supercladeA).  
strain\_has\_superclade(strainClinical56282,supercladeA).  
strain\_has\_superclade(strainClinical56519,supercladeB).  
strain\_has\_superclade(strainClinical56832,supercladeB).  
strain\_has\_superclade(strainClinical58473,supercladeA).  
strain\_has\_superclade(strainClinical59364,supercladeB).  
strain\_has\_superclade(strainClinical59424,supercladeB).  
strain\_has\_superclade(strainClinical62914,supercladeB).  
strain\_has\_superclade(strainClinical63326,supercladeB).  
strain\_has\_superclade(strainClinical64555,supercladeB).  
strain\_has\_superclade(strainClinical81116,supercladeB).  
strain\_has\_superclade(strainClinicalF1,supercladeA).  
strain\_has\_superclade(strainClinicalF2,supercladeA).  
strain\_has\_superclade(strainClinicalF3,supercladeA).

strain\_has\_superclade(strainClinicalG1,supercladeA).  
strain\_has\_superclade(strainClinicalG2,supercladeA).  
strain\_has\_superclade(strainClinicalG3,supercladeA).  
strain\_has\_superclade(strainClinicalG4,supercladeA).  
strain\_has\_superclade(strainClinicalical15168,supercladeB).  
strain\_has\_superclade(strainClinicall31467,supercladeB).  
strain\_has\_superclade(strainClinicall38556,supercladeB).  
strain\_has\_superclade(strainClinicall39182,supercladeB).  
strain\_has\_superclade(strainClinicalM1,supercladeB).  
strain\_has\_superclade(strainGoose126,supercladeB).  
strain\_has\_superclade(strainGoose222,supercladeB).  
strain\_has\_superclade(strainGoose66,supercladeA).  
strain\_has\_superclade(strainGoose86,supercladeB).  
strain\_has\_superclade(strainHi40500471,supercladeB).  
strain\_has\_superclade(strainHi40520410,supercladeB).  
strain\_has\_superclade(strainHi40540310,supercladeA).  
strain\_has\_superclade(strainHi40540311,supercladeB).  
strain\_has\_superclade(strainHi40620293,supercladeA).  
strain\_has\_superclade(strainHi40620296,supercladeB).  
strain\_has\_superclade(strainHi40620300,supercladeB).  
strain\_has\_superclade(strainHi40680224,supercladeB).  
strain\_has\_superclade(strainHi40800231,supercladeB).  
strain\_has\_superclade(strainHi40840318,supercladeA).  
strain\_has\_superclade(strainHi40840324,supercladeB).  
strain\_has\_superclade(strainHi40900388,supercladeB).  
strain\_has\_superclade(strainHi40980306,supercladeB).  
strain\_has\_superclade(strainHi41000246,supercladeA).  
strain\_has\_superclade(strainHi41020285,supercladeA).  
strain\_has\_superclade(strainHi41040340,supercladeB).  
strain\_has\_superclade(strainHi41080433,supercladeA).  
strain\_has\_superclade(strainHi41080434,supercladeA).  
strain\_has\_superclade(strainHi41100305,supercladeB).  
strain\_has\_superclade(strainHi41120166,supercladeA).  
strain\_has\_superclade(strainHi41120167,supercladeA).  
strain\_has\_superclade(strainHi41160244,supercladeA).  
strain\_has\_superclade(strainHi41220381,supercladeA).  
strain\_has\_superclade(strainHi41220382,supercladeA).  
strain\_has\_superclade(strainHi41300251,supercladeB).  
strain\_has\_superclade(strainHi41300252,supercladeB).  
strain\_has\_superclade(strainHi41300259,supercladeB).  
strain\_has\_superclade(strainHi41360174,supercladeA).  
strain\_has\_superclade(strainHi41380304,supercladeA).  
strain\_has\_superclade(strainHi41500294,supercladeB).  
strain\_has\_superclade(strainHi41720262,supercladeB).  
strain\_has\_superclade(strainHi41760156,supercladeB).  
strain\_has\_superclade(strainHi41780227,supercladeB).  
strain\_has\_superclade(strainHi41780229,supercladeB).  
strain\_has\_superclade(strainHi41800342,supercladeB).  
strain\_has\_superclade(strainHi41840334,supercladeB).  
strain\_has\_superclade(strainHi41840336,supercladeB).  
strain\_has\_superclade(strainHi41880318,supercladeA).  
strain\_has\_superclade(strainHi42080176,supercladeB).  
strain\_has\_superclade(strainHi43240534,supercladeB).  
strain\_has\_superclade(strainHi43240536,supercladeB).

strain\_has\_superclade(strainHi43320472rept,supercladeB).  
strain\_has\_superclade(strainHi43320475,supercladeA).  
strain\_has\_superclade(strainHi43340233,supercladeA).  
strain\_has\_superclade(strainHi43380463,supercladeB).  
strain\_has\_superclade(strainHi43400514,supercladeB).  
strain\_has\_superclade(strainHi43480582,supercladeB).  
strain\_has\_superclade(strainHi43500234,supercladeA).  
strain\_has\_superclade(strainHi43580563,supercladeB).  
strain\_has\_superclade(strainHi43700324,supercladeB).  
strain\_has\_superclade(strainHi50520408,supercladeB).  
strain\_has\_superclade(strainHi80512,supercladeB).  
strain\_has\_superclade(strainHi80530,supercladeB).  
strain\_has\_superclade(strainHi80531,supercladeA).  
strain\_has\_superclade(strainHi80536,supercladeB).  
strain\_has\_superclade(strainHi80547,supercladeA).  
strain\_has\_superclade(strainHi80552,supercladeA).  
strain\_has\_superclade(strainHi80554,supercladeA).  
strain\_has\_superclade(strainHi80563,supercladeB).  
strain\_has\_superclade(strainHi80583,supercladeA).  
strain\_has\_superclade(strainHi80584,supercladeB).  
strain\_has\_superclade(strainHi80586,supercladeA).  
strain\_has\_superclade(strainHi80614,supercladeB).  
strain\_has\_superclade(strainHi80646,supercladeB).  
strain\_has\_superclade(strainHi80650,supercladeA).  
strain\_has\_superclade(strainHi80659,supercladeB).  
strain\_has\_superclade(strainHi80675,supercladeB).  
strain\_has\_superclade(strainHi80809,supercladeB).  
strain\_has\_superclade(strainHi80838,supercladeB).  
strain\_has\_superclade(strainHi80841,supercladeB).  
strain\_has\_superclade(strainHi80864,supercladeA).  
strain\_has\_superclade(strainHi80866,supercladeB).  
strain\_has\_superclade(strainHi80876,supercladeB).  
strain\_has\_superclade(strainHi80884,supercladeB).  
strain\_has\_superclade(strainHi80885,supercladeA).  
strain\_has\_superclade(strainHi80889,supercladeA).  
strain\_has\_superclade(strainHi80896,supercladeA).  
strain\_has\_superclade(strainHi80901,supercladeA).  
strain\_has\_superclade(strainHi80908,supercladeB).  
strain\_has\_superclade(strainHi80935,supercladeB).  
strain\_has\_superclade(strainHi80938,supercladeA).  
strain\_has\_superclade(strainHi80939,supercladeB).  
strain\_has\_superclade(strainHi80983,supercladeA).  
strain\_has\_superclade(strainHi80986,supercladeA).  
strain\_has\_superclade(strainHi81003,supercladeA).  
strain\_has\_superclade(strainHi81005,supercladeB).  
strain\_has\_superclade(strainHi81006rept,supercladeA).  
strain\_has\_superclade(strainHi81006,supercladeA).  
strain\_has\_superclade(strainHi81018,supercladeB).  
strain\_has\_superclade(strainHi81035,supercladeB).  
strain\_has\_superclade(strainHi81036,supercladeB).  
strain\_has\_superclade(strainHi81040,supercladeB).  
strain\_has\_superclade(strainHi81049,supercladeB).  
strain\_has\_superclade(strainHi81061,supercladeB).  
strain\_has\_superclade(strainHi81062rep,supercladeB).

strain\_has\_superclade(strainHi81109,supercladeA).  
strain\_has\_superclade(strainHi81121,supercladeB).  
strain\_has\_superclade(strainHi81132,supercladeA).  
strain\_has\_superclade(strainHi81135,supercladeA).  
strain\_has\_superclade(strainHi81139,supercladeB).  
strain\_has\_superclade(strainHi81143,supercladeB).  
strain\_has\_superclade(strainHi81180,supercladeA).  
strain\_has\_superclade(strainHi81181,supercladeB).  
strain\_has\_superclade(strainHi81205,supercladeB).  
strain\_has\_superclade(strainHi81206,supercladeA).  
strain\_has\_superclade(strainHi81214,supercladeB).  
strain\_has\_superclade(strainHi81239,supercladeB).  
strain\_has\_superclade(strainHi81266,supercladeA).  
strain\_has\_superclade(strainHi81268,supercladeA).  
strain\_has\_superclade(strainHi81270,supercladeA).  
strain\_has\_superclade(strainHi81276,supercladeA).  
strain\_has\_superclade(strainHi81289,supercladeA).  
strain\_has\_superclade(strainHi81290,supercladeA).  
strain\_has\_superclade(strainHi81292,supercladeB).  
strain\_has\_superclade(strainHi81311,supercladeB).  
strain\_has\_superclade(strainHi81335,supercladeA).  
strain\_has\_superclade(strainHi81338,supercladeB).  
strain\_has\_superclade(strainHi81342,supercladeA).  
strain\_has\_superclade(strainHi81357,supercladeB).  
strain\_has\_superclade(strainHi81363,supercladeB).  
strain\_has\_superclade(strainHi81371,supercladeB).  
strain\_has\_superclade(strainLamb11,supercladeB).  
strain\_has\_superclade(strainMilk1398,supercladeB).  
strain\_has\_superclade(strainMilk1403,supercladeA).  
strain\_has\_superclade(strainMilk1899\_BA,supercladeA).  
strain\_has\_superclade(strainMilk1899\_BC,supercladeB).  
strain\_has\_superclade(strainOvine12241,supercladeB).  
strain\_has\_superclade(strainOvine12481,supercladeB).  
strain\_has\_superclade(strainOvineC55,supercladeA).  
strain\_has\_superclade(strainOvineSM4,supercladeA).  
strain\_has\_superclade(strainOvineSM6,supercladeA).  
strain\_has\_superclade(strainOvineSM8,supercladeA).  
strain\_has\_superclade(strainSheep11,supercladeA).  
strain\_has\_superclade(strainSheep18,supercladeA).  
strain\_has\_superclade(strainSheep2,supercladeA).  
strain\_has\_superclade(strainSheep8,supercladeB).  
strain\_has\_superclade(strainSheepSM7,supercladeB).  
strain\_has\_superclade(strainSheepSM9,supercladeA).  
strain\_has\_superclade(strainStarling86857,supercladeB).  
strain\_has\_superclade(strainTurkey4,supercladeA).  
strain\_has\_superclade(strainTurkey8,supercladeB).  
strain\_has\_superclade(strainWaterS5,supercladeB).  
strain\_has\_superclade(strainWaterSA5,supercladeB).

```
% CPS_PATHWAY_PL
% Campylobacter jejuni capsule pathway compiled from KEGG and BioCyc
% augmented by some specific information about the C. jejuni capsul
% glycan structure that were extracted from publications.
```

```
species_t(cje).
db_t(brendan).
```

```
pathway_t(capsule).
pathway_name(brendan,cje,capsule,'Capsule synthesis pathway').
```

```
subpathway_t(cap_hep).
subpathway(brendan,cje,cap_hep,capsule).
subpathway_name(brendan,cje,cap_hep,'Heptose biosynthesis').
```

```
%% Hep biosynthesis component (alternative to that given for LOS pathway above)
```

```
compound_t('gdp-dd-hep').
compound(brendan,cje,'gdp-dd-hep').
compound_name(brendan,'gdp-dd-hep','GDP-D,D-heptose').
```

```
compound_t('gdp-d-al-gluco-hep').
compound(brendan,cje,'gdp-d-al-gluco-hep').
compound_name(brendan,'gdp-d-al-gluco-hep','GDP-D-glycero-alpha-L-glucoheptose').
```

```
reaction_t(capsule_hep1).
reaction(brendan,cje,capsule_hep1,'d-sedohep-7-p','dd-hep-7-p',1).
reaction_gene(brendan,cje,capsule_hep1,cj1424c).
reaction_subpathway(brendan,cje,capsule_hep1,cap_hep).
reaction_pathway(brendan,cje,capsule_hep1,capsule).
```

```
gene_t(cj1424c).
gene(brendan,cje,cj1424c).
gene_name(brendan,cj1424c,'GmhA2').
```

```
reaction_t(capsule_hep2).
reaction_gene(brendan,cje,capsule_hep2,cj1425c).
reaction(brendan,cje,capsule_hep2,'dd-hep-7-p','dd-hep-17-pp',1).
reaction_subpathway(brendan,cje,capsule_hep2,cap_hep).
reaction_pathway(brendan,cje,capsule_hep2,capsule).
```

```
gene_t(cj1425c).
gene(brendan,cje,cj1425c).
gene_name(brendan,cj1425c,'HddA').
```

```
reaction_t(capsule_hep3).
reaction_gene(brendan,cje,capsule_hep3,cj1152c).
reaction(brendan,cje,capsule_hep3,'dd-hep-17-pp','dd-hep-1-p',1).
reaction_subpathway(brendan,cje,capsule_hep3,cap_hep).
reaction_pathway(brendan,cje,capsule_hep3,capsule).
```

```
reaction_t(capsule_hep4).
```

```
reaction_gene(brendan,cje,capsule_hep4,cj1423c).
reaction(brendan,cje,capsule_hep4,'dd-hep-1-p','gdp-dd-hep',1).
reaction_subpathway(brendan,cje,capsule_hep4,cap_hep).
reaction_pathway(brendan,cje,capsule_hep4,capsule).
```

```
gene_t(cj1423c).
gene(brendan,cje,cj1423c).
gene_name(brendan,cj1423c,'HddC').
```

```
reaction_t(capsule_hep5).
reaction_gene(brendan,cje,capsule_hep5,cj1427c).
reaction_gene(brendan,cje,capsule_hep5,cj1428c).
reaction_gene(brendan,cje,capsule_hep5,cj1430c).
reaction(brendan,cje,capsule_hep5,'gdp-dd-hep','gdp-d-al-gluco-hep',1).
reaction_subpathway(brendan,cje,capsule_hep5,cap_hep).
reaction_pathway(brendan,cje,capsule_hep5,capsule).
```

```
gene_t(cj1427c).
gene(brendan,cje,cj1427c).
gene_name(brendan,cj1427c,'Putative UDP-glucose 4-epimerase').
gene_t(cj1428c).
gene(brendan,cje,cj1428c).
gene_name(brendan,cj1428c,'Fcl').
gene_t(cj1430c).
gene(brendan,cje,cj1430c).
gene_name(brendan,cj1430c,'Putative dTDP-4-dehydrorhamnose 3,5-epimerase').
```

%% adding next unit to chain

```
compound_t('capsule_chain').
compound(brendan,cje,'capsule_chain').
compound_name(brendan,'capsule_chain','Capsule chain (X)').
```

```
compound_t('glca').
compound(brendan,cje,'glca').
compound_name(brendan,'glca','GlcA-X').
```

```
compound_t('glca6ngro').
compound(brendan,cje,'glca6ngro').
compound_name(brendan,'glca6ngro','GlcA6(NGro)-X').
```

```
compound_t('glca6etn').
compound(brendan,cje,'glca6etn').
compound_name(brendan,'glca6etn','GlcA6(EtN)-X').
```

%% for glca6ngro

%% side Hep group + phase variable modifications

```
compound_t('glca6ngro+hep').
compound(brendan,cje,'glca6ngro+hep').
compound_name(brendan,'glca6ngro+hep','GlcA6(NGro)+Hep-X').
```

```
compound_t('glca6ngro+hep+omepn').
compound(brendan,cje,'glca6ngro+hep+omepn').
compound_name(brendan,'glca6ngro+hep+omepn','GlcA6\(\NGro\)+\(\Hep+OMePN\)-X').
```

```
compound_t('glca6ngro+hep+3ome').
compound(brendan,cje,'glca6ngro+hep+3ome').
compound_name(brendan,'glca6ngro+hep+3ome','GlcA6\(\NGro\)+\(\Hep+3OMe\)-X').
```

```
compound_t('glca6ngro+hep+6ome').
compound(brendan,cje,'glca6ngro+hep+6ome').
compound_name(brendan,'glca6ngro+hep+6ome','GlcA6\(\NGro\)+\(\Hep+6OMe\)-X').
```

```
compound_t('glca6ngro+hep+omepn+3ome').
compound(brendan,cje,'glca6ngro+hep+omepn+3ome').
compound_name(brendan,'glca6ngro+hep+omepn+3ome','GlcA6\(\NGro\)+\(\Hep+OMePN+3OMe\)-X').
```

```
compound_t('glca6ngro+hep+omepn+6ome').
compound(brendan,cje,'glca6ngro+hep+omepn+6ome').
compound_name(brendan,'glca6ngro+hep+omepn+6ome','GlcA6\(\NGro\)+\(\Hep+OMePN+6OMe\)-X').
```

```
compound_t('glca6ngro+hep+3ome+6ome').
compound(brendan,cje,'glca6ngro+hep+3ome+6ome').
compound_name(brendan,'glca6ngro+hep+3ome+6ome','GlcA6\(\NGro\)+\(\Hep+3OMe+6OMe\)-X').
```

```
compound_t('glca6ngro+hep+omepn+3ome+6ome').
compound(brendan,cje,'glca6ngro+hep+omepn+3ome+6ome').
compound_name(brendan,'glca6ngro+hep+omepn+3ome+6ome','GlcA6\(\NGro\)+\(\Hep+OMePN+3OMe+6OMe\)-X').
```

%% GalfNAc group + phase variable group

```
compound_t('glca6ngro-galfnac').
compound(brendan,cje,'glca6ngro-galfnac').
compound_name(brendan,'glca6ngro-galfnac','GalfNAc-GlcA6\(\NGro\)-X').
```

```
compound_t('glca6ngro+hep-galfnac').
compound(brendan,cje,'glca6ngro+hep-galfnac').
compound_name(brendan,'glca6ngro+hep-galfnac','GalfNAc-GlcA6\(\NGro\)+Hep-X').
```

```
compound_t('glca6ngro+hep+omepn-galfnac').
compound(brendan,cje,'glca6ngro+hep+omepn-galfnac').
compound_name(brendan,'glca6ngro+hep+omepn-galfnac','GalfNAc-GlcA6\(\NGro\)+\(\Hep+OMePN\)-X').
```

```
compound_t('glca6ngro+hep+3ome-galfnac').
compound(brendan,cje,'glca6ngro+hep+3ome-galfnac').
compound_name(brendan,'glca6ngro+hep+3ome-galfnac','GalfNAc-GlcA6\(\NGro\)+\(\Hep+3OMe\)-X').
```

```
compound_t('glca6ngro+hep+6ome-galfnac').
compound(brendan,cje,'glca6ngro+hep+6ome-galfnac').
compound_name(brendan,'glca6ngro+hep+6ome-galfnac','GalfNAc-GlcA6\(\NGro\)+\(\Hep+6OMe\)-X').
```

```
compound_t('glca6ngro+hep+omepn+3ome-galfnac').
compound(brendan,cje,'glca6ngro+hep+omepn+3ome-galfnac').
compound_name(brendan,'glca6ngro+hep+omepn+3ome-galfnac','GalfNAc-GlcA6\(\NGro\)+\(\Hep+OMePN+3OMe\)-X').
```



X').

```
compound_t('glca6ngro+hep+omepn+6ome-galfnac').  
compound(brendan,cje,'glca6ngro+hep+omepn+6ome-galfnac').  
compound_name(brendan,'glca6ngro+hep+omepn+6ome-galfnac','GalfNAc-GlcA6\(\NGro\)+\(\Hep+OMePN+6OMe\)-X').
```

```
compound_t('glca6ngro+hep+3ome+6ome-galfnac').  
compound(brendan,cje,'glca6ngro+hep+3ome+6ome-galfnac').  
compound_name(brendan,'glca6ngro+hep+3ome+6ome-galfnac','GalfNAc-GlcA6\(\NGro\)+\(\Hep+3OMe+6OMe\)-X').
```

```
compound_t('glca6ngro+hep+omepn+3ome+6ome-galfnac').  
compound(brendan,cje,'glca6ngro+hep+omepn+3ome+6ome-galfnac').  
compound_name(brendan,'glca6ngro+hep+omepn+3ome+6ome-galfnac','GalfNAc-GlcA6\(\NGro\)+\(\Hep+OMePN+3OMe+6OMe\)-X').
```

```
compound_t('glca6ngro-galfnac+omepn').  
compound(brendan,cje,'glca6ngro-galfnac+omepn').  
compound_name(brendan,'glca6ngro-galfnac+omepn','GalfNAc+OMePN-GlcA6\(\NGro\)-X').
```

```
compound_t('glca6ngro+hep-galfnac+omepn').  
compound(brendan,cje,'glca6ngro+hep-galfnac+omepn').  
compound_name(brendan,'glca6ngro+hep-galfnac+omepn','GalfNAc+OMePN-GlcA6\(\NGro\)+Hep-X').
```

```
compound_t('glca6ngro+hep+omepn-galfnac+omepn').  
compound(brendan,cje,'glca6ngro+hep+omepn-galfnac+omepn').  
compound_name(brendan,'glca6ngro+hep+omepn-galfnac+omepn','GalfNAc+OMePN-GlcA6\(\NGro\)+\(\Hep+OMePN\)-X').
```

```
compound_t('glca6ngro+hep+3ome-galfnac+omepn').  
compound(brendan,cje,'glca6ngro+hep+3ome-galfnac+omepn').  
compound_name(brendan,'glca6ngro+hep+3ome-galfnac+omepn','GalfNAc+OMePN-GlcA6\(\NGro\)+\(\Hep+3OMe\)-X').
```

```
compound_t('glca6ngro+hep+6ome-galfnac+omepn').  
compound(brendan,cje,'glca6ngro+hep+6ome-galfnac+omepn').  
compound_name(brendan,'glca6ngro+hep+6ome-galfnac+omepn','GalfNAc+OMePN-GlcA6\(\NGro\)+\(\Hep+6OMe\)-X').
```

```
compound_t('glca6ngro+hep+omepn+3ome-galfnac+omepn').  
compound(brendan,cje,'glca6ngro+hep+omepn+3ome-galfnac+omepn').  
compound_name(brendan,'glca6ngro+hep+omepn+3ome-galfnac+omepn','GalfNAc+OMePN-GlcA6\(\NGro\)+\(\Hep+OMePN+3OMe\)-X').
```

```
compound_t('glca6ngro+hep+omepn+6ome-galfnac+omepn').  
compound(brendan,cje,'glca6ngro+hep+omepn+6ome-galfnac+omepn').  
compound_name(brendan,'glca6ngro+hep+omepn+6ome-galfnac+omepn','GalfNAc+OMePN-GlcA6\(\NGro\)+\(\Hep+OMePN+6OMe\)-X').
```

```
compound_t('glca6ngro+hep+3ome+6ome-galfnac+omepn').  
compound(brendan,cje,'glca6ngro+hep+3ome+6ome-galfnac+omepn').  
compound_name(brendan,'glca6ngro+hep+3ome+6ome-galfnac+omepn','GalfNAc+OMePN-GlcA6\(\NGro\)+\(\Hep+3OMe+6OMe\)-X').
```

```
compound_t('glca6ngro+hep+omepn+3ome+6ome-galfnac+omepn').
compound(brendan,cje,'glca6ngro+hep+omepn+3ome+6ome-galfnac+omepn').
compound_name(brendan,'glca6ngro+hep+omepn+3ome+6ome-galfnac+omepn','GalFNAC+OMePN-
GlcA6\(\NGro)\+\(Hep+OMePN+3OMe+6OMe\)-X').
```

%% Ribf group

```
compound_t('glca6ngro-galfnac-ribf').
compound(brendan,cje,'glca6ngro-galfnac-ribf').
compound_name(brendan,'glca6ngro-galfnac-ribf','Ribf-GalFNAC-GlcA6\(\NGro\)-X').
```

```
compound_t('glca6ngro+hep-galfnac-ribf').
compound(brendan,cje,'glca6ngro+hep-galfnac-ribf').
compound_name(brendan,'glca6ngro+hep-galfnac-ribf','Ribf-GalFNAC-GlcA6\(\NGro\)+Hep-X').
```

```
compound_t('glca6ngro+hep+omepn-galfnac-ribf').
compound(brendan,cje,'glca6ngro+hep+omepn-galfnac-ribf').
compound_name(brendan,'glca6ngro+hep+omepn-galfnac-ribf','Ribf-GalFNAC-GlcA6\(\NGro\)\+\(Hep+OMePN\)-X').
```

```
compound_t('glca6ngro+hep+3ome-galfnac-ribf').
compound(brendan,cje,'glca6ngro+hep+3ome-galfnac-ribf').
compound_name(brendan,'glca6ngro+hep+3ome-galfnac-ribf','Ribf-GalFNAC-GlcA6\(\NGro\)\+\(Hep+3OMe\)-X').
```

```
compound_t('glca6ngro+hep+6ome-galfnac-ribf').
compound(brendan,cje,'glca6ngro+hep+6ome-galfnac-ribf').
compound_name(brendan,'glca6ngro+hep+6ome-galfnac-ribf','Ribf-GalFNAC-GlcA6\(\NGro\)\+\(Hep+6OMe\)-X').
```

```
compound_t('glca6ngro+hep+omepn+3ome-galfnac-ribf').
compound(brendan,cje,'glca6ngro+hep+omepn+3ome-galfnac-ribf').
compound_name(brendan,'glca6ngro+hep+omepn+3ome-galfnac-ribf','Ribf-GalFNAC-
GlcA6\(\NGro)\+\(Hep+OMePN+3OMe\)-X').
```

```
compound_t('glca6ngro+hep+omepn+6ome-galfnac-ribf').
compound(brendan,cje,'glca6ngro+hep+omepn+6ome-galfnac-ribf').
compound_name(brendan,'glca6ngro+hep+omepn+6ome-galfnac-ribf','Ribf-GalFNAC-
GlcA6\(\NGro)\+\(Hep+OMePN+6OMe\)-X').
```

```
compound_t('glca6ngro+hep+3ome+6ome-galfnac-ribf').
compound(brendan,cje,'glca6ngro+hep+3ome+6ome-galfnac-ribf').
compound_name(brendan,'glca6ngro+hep+3ome+6ome-galfnac-ribf','Ribf-GalFNAC-
GlcA6\(\NGro)\+\(Hep+3OMe+6OMe\)-X').
```

```
compound_t('glca6ngro+hep+omepn+3ome+6ome-galfnac-ribf').
compound(brendan,cje,'glca6ngro+hep+omepn+3ome+6ome-galfnac-ribf').
compound_name(brendan,'glca6ngro+hep+omepn+3ome+6ome-galfnac-ribf','Ribf-GalFNAC-
GlcA6\(\NGro)\+\(Hep+OMePN+3OMe+6OMe\)-X').
```

```
compound_t('glca6ngro-galfnac+omepn-ribf').
compound(brendan,cje,'glca6ngro-galfnac+omepn-ribf').
compound_name(brendan,'glca6ngro-galfnac+omepn-ribf','Ribf-GalFNAC+OMePN-GlcA6\(\NGro\)-X').
```

```
compound_t('glca6ngro+hep-galfnac+omepn-ribf').
compound(brendan,cje,'glca6ngro+hep-galfnac+omepn-ribf').
compound_name(brendan,'glca6ngro+hep-galfnac+omepn-ribf','Ribf-GalFNAC+OMePN-GlcA6\(\NGro\)+Hep-X').
```

```
compound_t('glca6ngro+hep+omepn-galfnac+omepn-ribf').
compound(brendan,cje,'glca6ngro+hep+omepn-galfnac+omepn-ribf').
compound_name(brendan,'glca6ngro+hep+omepn-galfnac+omepn-ribf','Ribf-GalfNac+OMePN-
GlcA6\(\NGro\)+\(\Hep+OMePN\)-X').
```

```
compound_t('glca6ngro+hep+3ome-galfnac+omepn-ribf').
compound(brendan,cje,'glca6ngro+hep+3ome-galfnac+omepn-ribf').
compound_name(brendan,'glca6ngro+hep+3ome-galfnac+omepn-ribf','Ribf-GalfNac+OMePN-
GlcA6\(\NGro\)+\(\Hep+3OMe\)-X').
```

```
compound_t('glca6ngro+hep+6ome-galfnac+omepn-ribf').
compound(brendan,cje,'glca6ngro+hep+6ome-galfnac+omepn-ribf').
compound_name(brendan,'glca6ngro+hep+6ome-galfnac+omepn-ribf','Ribf-GalfNac+OMePN-
GlcA6\(\NGro\)+\(\Hep+6OMe\)-X').
```

```
compound_t('glca6ngro+hep+omepn+3ome-galfnac+omepn-ribf').
compound(brendan,cje,'glca6ngro+hep+omepn+3ome-galfnac+omepn-ribf').
compound_name(brendan,'glca6ngro+hep+omepn+3ome-galfnac+omepn-ribf','Ribf-GalfNac+OMePN-
GlcA6\(\NGro\)+\(\Hep+OMePN+3OMe\)-X').
```

```
compound_t('glca6ngro+hep+omepn+6ome-galfnac+omepn-ribf').
compound(brendan,cje,'glca6ngro+hep+omepn+6ome-galfnac+omepn-ribf').
compound_name(brendan,'glca6ngro+hep+omepn+6ome-galfnac+omepn-ribf','Ribf-GalfNac+OMePN-
GlcA6\(\NGro\)+\(\Hep+OMePN+6OMe\)-X').
```

```
compound_t('glca6ngro+hep+3ome+6ome-galfnac+omepn-ribf').
compound(brendan,cje,'glca6ngro+hep+3ome+6ome-galfnac+omepn-ribf').
compound_name(brendan,'glca6ngro+hep+3ome+6ome-galfnac+omepn-ribf','Ribf-GalfNac+OMePN-
GlcA6\(\NGro\)+\(\Hep+3OMe+6OMe\)-X').
```

```
compound_t('glca6ngro+hep+omepn+3ome+6ome-galfnac+omepn-ribf').
compound(brendan,cje,'glca6ngro+hep+omepn+3ome+6ome-galfnac+omepn-ribf').
compound_name(brendan,'glca6ngro+hep+omepn+3ome+6ome-galfnac+omepn-ribf','Ribf-GalfNac+OMePN-
GlcA6\(\NGro\)+\(\Hep+OMePN+3OMe+6OMe\)-X').
```

%% now for EtN phase variable modification

%% side Hep group + phase variable modifications

```
compound_t('glca6etn+hep').
compound(brendan,cje,'glca6etn+hep').
compound_name(brendan,'glca6etn+hep','GlcA6\(\EtN\)+Hep-X').
```

```
compound_t('glca6etn+hep+omepn').
compound(brendan,cje,'glca6etn+hep+omepn').
compound_name(brendan,'glca6etn+hep+omepn','GlcA6\(\EtN\)+\(\Hep+OMePN\)-X').
```

```
compound_t('glca6etn+hep+3ome').
compound(brendan,cje,'glca6etn+hep+3ome').
compound_name(brendan,'glca6etn+hep+3ome','GlcA6\(\EtN\)+\(\Hep+3OMe\)-X').
```

```
compound_t('glca6etn+hep+6ome').
```

compound(brendan,cje,'glca6etn+hep+6ome').  
compound\_name(brendan,'glca6etn+hep+6ome','GlcA6(EtN)\(Hep+6OMe\)-X').

compound\_t('glca6etn+hep+omepn+3ome').  
compound(brendan,cje,'glca6etn+hep+omepn+3ome').  
compound\_name(brendan,'glca6etn+hep+omepn+3ome','GlcA6(EtN)\(Hep+OMePN+3OMe\)-X').

compound\_t('glca6etn+hep+omepn+6ome').  
compound(brendan,cje,'glca6etn+hep+omepn+6ome').  
compound\_name(brendan,'glca6etn+hep+omepn+6ome','GlcA6(EtN)\(Hep+OMePN+6OMe\)-X').

compound\_t('glca6etn+hep+3ome+6ome').  
compound(brendan,cje,'glca6etn+hep+3ome+6ome').  
compound\_name(brendan,'glca6etn+hep+3ome+6ome','GlcA6(EtN)\(Hep+3OMe+6OMe\)-X').

compound\_t('glca6etn+hep+omepn+3ome+6ome').  
compound(brendan,cje,'glca6etn+hep+omepn+3ome+6ome').  
compound\_name(brendan,'glca6etn+hep+omepn+3ome+6ome','GlcA6(EtN)\(Hep+OMePN+3OMe+6OMe\)-X').

%% GalfNAc group + phase variable group

compound\_t('glca6etn-galfnac').  
compound(brendan,cje,'glca6etn-galfnac').  
compound\_name(brendan,'glca6etn-galfnac','GalfNAc-GlcA6(EtN\)-X').

compound\_t('glca6etn+hep-galfnac').  
compound(brendan,cje,'glca6etn+hep-galfnac').  
compound\_name(brendan,'glca6etn+hep-galfnac','GalfNAc-GlcA6(EtN\)+Hep-X').

compound\_t('glca6etn+hep+omepn-galfnac').  
compound(brendan,cje,'glca6etn+hep+omepn-galfnac').  
compound\_name(brendan,'glca6etn+hep+omepn-galfnac','GalfNAc-GlcA6(EtN)\(Hep+OMePN\)-X').

compound\_t('glca6etn+hep+3ome-galfnac').  
compound(brendan,cje,'glca6etn+hep+3ome-galfnac').  
compound\_name(brendan,'glca6etn+hep+3ome-galfnac','GalfNAc-GlcA6(EtN)\(Hep+3OMe\)-X').

compound\_t('glca6etn+hep+6ome-galfnac').  
compound(brendan,cje,'glca6etn+hep+6ome-galfnac').  
compound\_name(brendan,'glca6etn+hep+6ome-galfnac','GalfNAc-GlcA6(EtN)\(Hep+6OMe\)-X').

compound\_t('glca6etn+hep+omepn+3ome-galfnac').  
compound(brendan,cje,'glca6etn+hep+omepn+3ome-galfnac').  
compound\_name(brendan,'glca6etn+hep+omepn+3ome-galfnac','GalfNAc-GlcA6(EtN)\(Hep+OMePN+3OMe\)-X').

compound\_t('glca6etn+hep+omepn+6ome-galfnac').  
compound(brendan,cje,'glca6etn+hep+omepn+6ome-galfnac').  
compound\_name(brendan,'glca6etn+hep+omepn+6ome-galfnac','GalfNAc-GlcA6(EtN)\(Hep+OMePN+6OMe\)-X').

compound\_t('glca6etn+hep+3ome+6ome-galfnac').  
compound(brendan,cje,'glca6etn+hep+3ome+6ome-galfnac').  
compound\_name(brendan,'glca6etn+hep+3ome+6ome-galfnac','GalfNAc-GlcA6(EtN)\(Hep+3OMe+6OMe\)-X').

compound\_t('glca6etn+hep+omepn+3ome+6ome-galfnac').

compound(brendan,cje,'glca6etn+hep+omepn+3ome+6ome-galfnac').  
compound\_name(brendan,'glca6etn+hep+omepn+3ome+6ome-galfnac','GalfnAc-GlcA6(EtN)\+(Hep+OMePN+3OMe+6OMe)-X').

compound\_t('glca6etn-galfnac+omepn').  
compound(brendan,cje,'glca6etn-galfnac+omepn').  
compound\_name(brendan,'glca6etn-galfnac+omepn','GalfnAc+OMePN-GlcA6(EtN)-X').

compound\_t('glca6etn+hep-galfnac+omepn').  
compound(brendan,cje,'glca6etn+hep-galfnac+omepn').  
compound\_name(brendan,'glca6etn+hep-galfnac+omepn','GalfnAc+OMePN-GlcA6(EtN)+Hep-X').

compound\_t('glca6etn+hep+omepn-galfnac+omepn').  
compound(brendan,cje,'glca6etn+hep+omepn-galfnac+omepn').  
compound\_name(brendan,'glca6etn+hep+omepn-galfnac+omepn','GalfnAc+OMePN-GlcA6(EtN)\+(Hep+OMePN)-X').

compound\_t('glca6etn+hep+3ome-galfnac+omepn').  
compound(brendan,cje,'glca6etn+hep+3ome-galfnac+omepn').  
compound\_name(brendan,'glca6etn+hep+3ome-galfnac+omepn','GalfnAc+OMePN-GlcA6(EtN)\+(Hep+3OMe)-X').

compound\_t('glca6etn+hep+6ome-galfnac+omepn').  
compound(brendan,cje,'glca6etn+hep+6ome-galfnac+omepn').  
compound\_name(brendan,'glca6etn+hep+6ome-galfnac+omepn','GalfnAc+OMePN-GlcA6(EtN)\+(Hep+6OMe)-X').

compound\_t('glca6etn+hep+omepn+3ome-galfnac+omepn').  
compound(brendan,cje,'glca6etn+hep+omepn+3ome-galfnac+omepn').  
compound\_name(brendan,'glca6etn+hep+omepn+3ome-galfnac+omepn','GalfnAc+OMePN-GlcA6(EtN)\+(Hep+OMePN+3OMe)-X').

compound\_t('glca6etn+hep+omepn+6ome-galfnac+omepn').  
compound(brendan,cje,'glca6etn+hep+omepn+6ome-galfnac+omepn').  
compound\_name(brendan,'glca6etn+hep+omepn+6ome-galfnac+omepn','GalfnAc+OMePN-GlcA6(EtN)\+(Hep+OMePN+6OMe)-X').

compound\_t('glca6etn+hep+3ome+6ome-galfnac+omepn').  
compound(brendan,cje,'glca6etn+hep+3ome+6ome-galfnac+omepn').  
compound\_name(brendan,'glca6etn+hep+3ome+6ome-galfnac+omepn','GalfnAc+OMePN-GlcA6(EtN)\+(Hep+3OMe+6OMe)-X').

compound\_t('glca6etn+hep+omepn+3ome+6ome-galfnac+omepn').  
compound(brendan,cje,'glca6etn+hep+omepn+3ome+6ome-galfnac+omepn').  
compound\_name(brendan,'glca6etn+hep+omepn+3ome+6ome-galfnac+omepn','GalfnAc+OMePN-GlcA6(EtN)\+(Hep+OMePN+3OMe+6OMe)-X').

%% Ribf group

compound\_t('glca6etn-galfnac-ribf').  
compound(brendan,cje,'glca6etn-galfnac-ribf').  
compound\_name(brendan,'glca6etn-galfnac-ribf','Ribf-GalfnAc-GlcA6(EtN)-X').

compound\_t('glca6etn+hep-galfnac-ribf').  
compound(brendan,cje,'glca6etn+hep-galfnac-ribf').  
compound\_name(brendan,'glca6etn+hep-galfnac-ribf','Ribf-GalfnAc-GlcA6(EtN)+Hep-X').

compound\_t('glca6etn+hep+omepn-galfnac-ribf').  
compound(brendan,cje,'glca6etn+hep+omepn-galfnac-ribf').  
compound\_name(brendan,'glca6etn+hep+omepn-galfnac-ribf','Ribf-GalfNAc-GlcA6(EtN)+(Hep+OMePN)-X').

compound\_t('glca6etn+hep+3ome-galfnac-ribf').  
compound(brendan,cje,'glca6etn+hep+3ome-galfnac-ribf').  
compound\_name(brendan,'glca6etn+hep+3ome-galfnac-ribf','Ribf-GalfNAc-GlcA6(EtN)+(Hep+3OMe)-X').

compound\_t('glca6etn+hep+6ome-galfnac-ribf').  
compound(brendan,cje,'glca6etn+hep+6ome-galfnac-ribf').  
compound\_name(brendan,'glca6etn+hep+6ome-galfnac-ribf','Ribf-GalfNAc-GlcA6(EtN)+(Hep+6OMe)-X').

compound\_t('glca6etn+hep+omepn+3ome-galfnac-ribf').  
compound(brendan,cje,'glca6etn+hep+omepn+3ome-galfnac-ribf').  
compound\_name(brendan,'glca6etn+hep+omepn+3ome-galfnac-ribf','Ribf-GalfNAc-GlcA6(EtN)+(Hep+OMePN+3OMe)-X').

compound\_t('glca6etn+hep+omepn+6ome-galfnac-ribf').  
compound(brendan,cje,'glca6etn+hep+omepn+6ome-galfnac-ribf').  
compound\_name(brendan,'glca6etn+hep+omepn+6ome-galfnac-ribf','Ribf-GalfNAc-GlcA6(EtN)+(Hep+OMePN+6OMe)-X').

compound\_t('glca6etn+hep+3ome+6ome-galfnac-ribf').  
compound(brendan,cje,'glca6etn+hep+3ome+6ome-galfnac-ribf').  
compound\_name(brendan,'glca6etn+hep+3ome+6ome-galfnac-ribf','Ribf-GalfNAc-GlcA6(EtN)+(Hep+3OMe+6OMe)-X').

compound\_t('glca6etn+hep+omepn+3ome+6ome-galfnac-ribf').  
compound(brendan,cje,'glca6etn+hep+omepn+3ome+6ome-galfnac-ribf').  
compound\_name(brendan,'glca6etn+hep+omepn+3ome+6ome-galfnac-ribf','Ribf-GalfNAc-GlcA6(EtN)+(Hep+OMePN+3OMe+6OMe)-X').

compound\_t('glca6etn-galfnac+omepn-ribf').  
compound(brendan,cje,'glca6etn-galfnac+omepn-ribf').  
compound\_name(brendan,'glca6etn-galfnac+omepn-ribf','Ribf-GalfNAc+OMePN-GlcA6(EtN)-X').

compound\_t('glca6etn+hep-galfnac+omepn-ribf').  
compound(brendan,cje,'glca6etn+hep-galfnac+omepn-ribf').  
compound\_name(brendan,'glca6etn+hep-galfnac+omepn-ribf','Ribf-GalfNAc+OMePN-GlcA6(EtN)+Hep-X').

compound\_t('glca6etn+hep+omepn-galfnac+omepn-ribf').  
compound(brendan,cje,'glca6etn+hep+omepn-galfnac+omepn-ribf').  
compound\_name(brendan,'glca6etn+hep+omepn-galfnac+omepn-ribf','Ribf-GalfNAc+OMePN-GlcA6(EtN)+(Hep+OMePN)-X').

compound\_t('glca6etn+hep+3ome-galfnac+omepn-ribf').  
compound(brendan,cje,'glca6etn+hep+3ome-galfnac+omepn-ribf').  
compound\_name(brendan,'glca6etn+hep+3ome-galfnac+omepn-ribf','Ribf-GalfNAc+OMePN-GlcA6(EtN)+(Hep+3OMe)-X').

compound\_t('glca6etn+hep+6ome-galfnac+omepn-ribf').  
compound(brendan,cje,'glca6etn+hep+6ome-galfnac+omepn-ribf').  
compound\_name(brendan,'glca6etn+hep+6ome-galfnac+omepn-ribf','Ribf-GalfNAc+OMePN-

GlcA6(EtN)\(Hep+6OMe)-X').

compound\_t('glca6etn+hep+omepn+3ome-galfnac+omepn-ribf').

compound(brendan,cje,'glca6etn+hep+omepn+3ome-galfnac+omepn-ribf').

compound\_name(brendan,'glca6etn+hep+omepn+3ome-galfnac+omepn-ribf','Ribf-GalfNac+OMePN-GlcA6(EtN)\(Hep+OMePN+3OMe)-X').

compound\_t('glca6etn+hep+omepn+6ome-galfnac+omepn-ribf').

compound(brendan,cje,'glca6etn+hep+omepn+6ome-galfnac+omepn-ribf').

compound\_name(brendan,'glca6etn+hep+omepn+6ome-galfnac+omepn-ribf','Ribf-GalfNac+OMePN-GlcA6(EtN)\(Hep+OMePN+6OMe)-X').

compound\_t('glca6etn+hep+3ome+6ome-galfnac+omepn-ribf').

compound(brendan,cje,'glca6etn+hep+3ome+6ome-galfnac+omepn-ribf').

compound\_name(brendan,'glca6etn+hep+3ome+6ome-galfnac+omepn-ribf','Ribf-GalfNac+OMePN-GlcA6(EtN)\(Hep+3OMe+6OMe)-X').

compound\_t('glca6etn+hep+omepn+3ome+6ome-galfnac+omepn-ribf').

compound(brendan,cje,'glca6etn+hep+omepn+3ome+6ome-galfnac+omepn-ribf').

compound\_name(brendan,'glca6etn+hep+omepn+3ome+6ome-galfnac+omepn-ribf','Ribf-GalfNac+OMePN-GlcA6(EtN)\(Hep+OMePN+3OMe+6OMe)-X').

%% for glca without ngro or etn phase variable modification

%% side Hep group + phase variable modifications

compound\_t('glca+hep').

compound(brendan,cje,'glca+hep').

compound\_name(brendan,'glca+hep','GlcA+Hep-X').

compound\_t('glca+hep+omepn').

compound(brendan,cje,'glca+hep+omepn').

compound\_name(brendan,'glca+hep+omepn','GlcA+\(Hep+OMePN)-X').

compound\_t('glca+hep+3ome').

compound(brendan,cje,'glca+hep+3ome').

compound\_name(brendan,'glca+hep+3ome','GlcA+\(Hep+3OMe)-X').

compound\_t('glca+hep+6ome').

compound(brendan,cje,'glca+hep+6ome').

compound\_name(brendan,'glca+hep+6ome','GlcA+\(Hep+6OMe)-X').

compound\_t('glca+hep+omepn+3ome').

compound(brendan,cje,'glca+hep+omepn+3ome').

compound\_name(brendan,'glca+hep+omepn+3ome','GlcA+\(Hep+OMePN+3OMe)-X').

compound\_t('glca+hep+omepn+6ome').

compound(brendan,cje,'glca+hep+omepn+6ome').

compound\_name(brendan,'glca+hep+omepn+6ome','GlcA+\(Hep+OMePN+6OMe)-X').

compound\_t('glca+hep+3ome+6ome').

compound(brendan,cje,'glca+hep+3ome+6ome').

compound\_name(brendan,'glca+hep+3ome+6ome','GlcA+\(Hep+3OMe+6OMe)-X').

```
compound_t('glca+hep+omepn+3ome+6ome').
compound(brendan,cje,'glca+hep+omepn+3ome+6ome').
compound_name(brendan,'glca+hep+omepn+3ome+6ome','GlcA+\(Hep+OMePN+3OMe+6OMe\)-X').
```

%% GalfNAc group + phase variable group

```
compound_t('glca-galfnac').
compound(brendan,cje,'glca-galfnac').
compound_name(brendan,'glca-galfnac','GalfNAc-GlcA-X').
```

```
compound_t('glca+hep-galfnac').
compound(brendan,cje,'glca+hep-galfnac').
compound_name(brendan,'glca+hep-galfnac','GalfNAc-GlcA+Hep-X').
```

```
compound_t('glca+hep+omepn-galfnac').
compound(brendan,cje,'glca+hep+omepn-galfnac').
compound_name(brendan,'glca+hep+omepn-galfnac','GalfNAc-GlcA+\(Hep+OMePN\)-X').
```

```
compound_t('glca+hep+3ome-galfnac').
compound(brendan,cje,'glca+hep+3ome-galfnac').
compound_name(brendan,'glca+hep+3ome-galfnac','GalfNAc-GlcA+\(Hep+3OMe\)-X').
```

```
compound_t('glca+hep+6ome-galfnac').
compound(brendan,cje,'glca+hep+6ome-galfnac').
compound_name(brendan,'glca+hep+6ome-galfnac','GalfNAc-GlcA+\(Hep+6OMe\)-X').
```

```
compound_t('glca+hep+omepn+3ome-galfnac').
compound(brendan,cje,'glca+hep+omepn+3ome-galfnac').
compound_name(brendan,'glca+hep+omepn+3ome-galfnac','GalfNAc-GlcA+\(Hep+OMePN+3OMe\)-X').
```

```
compound_t('glca+hep+omepn+6ome-galfnac').
compound(brendan,cje,'glca+hep+omepn+6ome-galfnac').
compound_name(brendan,'glca+hep+omepn+6ome-galfnac','GalfNAc-GlcA+\(Hep+OMePN+6OMe\)-X').
```

```
compound_t('glca+hep+3ome+6ome-galfnac').
compound(brendan,cje,'glca+hep+3ome+6ome-galfnac').
compound_name(brendan,'glca+hep+3ome+6ome-galfnac','GalfNAc-GlcA+\(Hep+3OMe+6OMe\)-X').
```

```
compound_t('glca+hep+omepn+3ome+6ome-galfnac').
compound(brendan,cje,'glca+hep+omepn+3ome+6ome-galfnac').
compound_name(brendan,'glca+hep+omepn+3ome+6ome-galfnac','GalfNAc-GlcA+\(Hep+OMePN+3OMe+6OMe\)-X').
```

```
compound_t('glca-galfnac+omepn').
compound(brendan,cje,'glca-galfnac+omepn').
compound_name(brendan,'glca-galfnac+omepn','GalfNAc+OMePN-GlcA-X').
```

```
compound_t('glca+hep-galfnac+omepn').
compound(brendan,cje,'glca+hep-galfnac+omepn').
compound_name(brendan,'glca+hep-galfnac+omepn','GalfNAc+OMePN-GlcA+Hep-X').
```

```
compound_t('glca+hep+omepn-galfnac+omepn').
compound(brendan,cje,'glca+hep+omepn-galfnac+omepn').
```



compound\_name(brendan,'glca+hep+omepn-galfnac+omepn','GalfNAc+OMePN-GlcA+\(Hep+OMePN\) -X').

compound\_t('glca+hep+3ome-galfnac+omepn').

compound(brendan,cje,'glca+hep+3ome-galfnac+omepn').

compound\_name(brendan,'glca+hep+3ome-galfnac+omepn','GalfNAc+OMePN-GlcA+\(Hep+3OMe\) -X').

compound\_t('glca+hep+6ome-galfnac+omepn').

compound(brendan,cje,'glca+hep+6ome-galfnac+omepn').

compound\_name(brendan,'glca+hep+6ome-galfnac+omepn','GalfNAc+OMePN-GlcA+\(Hep+6OMe\) -X').

compound\_t('glca+hep+omepn+3ome-galfnac+omepn').

compound(brendan,cje,'glca+hep+omepn+3ome-galfnac+omepn').

compound\_name(brendan,'glca+hep+omepn+3ome-galfnac+omepn','GalfNAc+OMePN-GlcA+\(Hep+OMePN+3OMe\) -X').

compound\_t('glca+hep+omepn+6ome-galfnac+omepn').

compound(brendan,cje,'glca+hep+omepn+6ome-galfnac+omepn').

compound\_name(brendan,'glca+hep+omepn+6ome-galfnac+omepn','GalfNAc+OMePN-GlcA+\(Hep+OMePN+6OMe\) -X').

compound\_t('glca+hep+3ome+6ome-galfnac+omepn').

compound(brendan,cje,'glca+hep+3ome+6ome-galfnac+omepn').

compound\_name(brendan,'glca+hep+3ome+6ome-galfnac+omepn','GalfNAc+OMePN-GlcA+\(Hep+3OMe+6OMe\) -X').

compound\_t('glca+hep+omepn+3ome+6ome-galfnac+omepn').

compound(brendan,cje,'glca+hep+omepn+3ome+6ome-galfnac+omepn').

compound\_name(brendan,'glca+hep+omepn+3ome+6ome-galfnac+omepn','GalfNAc+OMePN-GlcA+\(Hep+OMePN+3OMe+6OMe\) -X').

%% Ribf group

compound\_t('glca-galfnac-ribf').

compound(brendan,cje,'glca-galfnac-ribf').

compound\_name(brendan,'glca-galfnac-ribf','Ribf-GalfNAc-GlcA-X').

compound\_t('glca+hep-galfnac-ribf').

compound(brendan,cje,'glca+hep-galfnac-ribf').

compound\_name(brendan,'glca+hep-galfnac-ribf','Ribf-GalfNAc-GlcA+Hep-X').

compound\_t('glca+hep+omepn-galfnac-ribf').

compound(brendan,cje,'glca+hep+omepn-galfnac-ribf').

compound\_name(brendan,'glca+hep+omepn-galfnac-ribf','Ribf-GalfNAc-GlcA+\(Hep+OMePN\) -X').

compound\_t('glca+hep+3ome-galfnac-ribf').

compound(brendan,cje,'glca+hep+3ome-galfnac-ribf').

compound\_name(brendan,'glca+hep+3ome-galfnac-ribf','Ribf-GalfNAc-GlcA+\(Hep+3OMe\) -X').

compound\_t('glca+hep+6ome-galfnac-ribf').

compound(brendan,cje,'glca+hep+6ome-galfnac-ribf').

compound\_name(brendan,'glca+hep+6ome-galfnac-ribf','Ribf-GalfNAc-GlcA+\(Hep+6OMe\) -X').

compound\_t('glca+hep+omepn+3ome-galfnac-ribf').

compound(brendan,cje,'glca+hep+omepn+3ome-galfnac-ribf').

compound\_name(brendan,'glca+hep+omepn+3ome-galfnac-ribf','Ribf-GalfNAc-GlcA+\(Hep+OMePN+3OMe\) -X').

compound\_t('glca+hep+omepn+6ome-galfnac-ribf').

compound(brendan,cje,'glca+hep+omepn+6ome-galfnac-ribf').

compound\_name(brendan,'glca+hep+omepn+6ome-galfnac-ribf','Ribf-GalfNAc-GlcA+\(Hep+OMePN+6OMe\) -X').

compound\_t('glca+hep+3ome+6ome-galfnac-ribf').

compound(brendan,cje,'glca+hep+3ome+6ome-galfnac-ribf').

compound\_name(brendan,'glca+hep+3ome+6ome-galfnac-ribf','Ribf-GalfNAc-GlcA+\(Hep+3OMe+6OMe\) -X').

compound\_t('glca+hep+omepn+3ome+6ome-galfnac-ribf').

compound(brendan,cje,'glca+hep+omepn+3ome+6ome-galfnac-ribf').

compound\_name(brendan,'glca+hep+omepn+3ome+6ome-galfnac-ribf','Ribf-GalfNAc-GlcA+\(Hep+OMePN+3OMe+6OMe\) -X').

compound\_t('glca-galfnac+omepn-ribf').

compound(brendan,cje,'glca-galfnac+omepn-ribf').

compound\_name(brendan,'glca-galfnac+omepn-ribf','Ribf-GalfNAc+OMePN-GlcA-X').

compound\_t('glca+hep-galfnac+omepn-ribf').

compound(brendan,cje,'glca+hep-galfnac+omepn-ribf').

compound\_name(brendan,'glca+hep-galfnac+omepn-ribf','Ribf-GalfNAc+OMePN-GlcA+Hep-X').

compound\_t('glca+hep+omepn-galfnac+omepn-ribf').

compound(brendan,cje,'glca+hep+omepn-galfnac+omepn-ribf').

compound\_name(brendan,'glca+hep+omepn-galfnac+omepn-ribf','Ribf-GalfNAc+OMePN-GlcA+\(Hep+OMePN\) -X').

compound\_t('glca+hep+3ome-galfnac+omepn-ribf').

compound(brendan,cje,'glca+hep+3ome-galfnac+omepn-ribf').

compound\_name(brendan,'glca+hep+3ome-galfnac+omepn-ribf','Ribf-GalfNAc+OMePN-GlcA+\(Hep+3OMe\) -X').

compound\_t('glca+hep+6ome-galfnac+omepn-ribf').

compound(brendan,cje,'glca+hep+6ome-galfnac+omepn-ribf').

compound\_name(brendan,'glca+hep+6ome-galfnac+omepn-ribf','Ribf-GalfNAc+OMePN-GlcA+\(Hep+6OMe\) -X').

compound\_t('glca+hep+omepn+3ome-galfnac+omepn-ribf').

compound(brendan,cje,'glca+hep+omepn+3ome-galfnac+omepn-ribf').

compound\_name(brendan,'glca+hep+omepn+3ome-galfnac+omepn-ribf','Ribf-GalfNAc+OMePN-GlcA+\(Hep+OMePN+3OMe\) -X').

compound\_t('glca+hep+omepn+6ome-galfnac+omepn-ribf').

compound(brendan,cje,'glca+hep+omepn+6ome-galfnac+omepn-ribf').

compound\_name(brendan,'glca+hep+omepn+6ome-galfnac+omepn-ribf','Ribf-GalfNAc+OMePN-GlcA+\(Hep+OMePN+6OMe\) -X').

compound\_t('glca+hep+3ome+6ome-galfnac+omepn-ribf').

compound(brendan,cje,'glca+hep+3ome+6ome-galfnac+omepn-ribf').

compound\_name(brendan,'glca+hep+3ome+6ome-galfnac+omepn-ribf','Ribf-GalfNAc+OMePN-GlcA+\(Hep+3OMe+6OMe\) -X').

compound\_t('glca+hep+omepn+3ome+6ome-galfnac+omepn-ribf').

compound(brendan,cje,'glca+hep+omepn+3ome+6ome-galfnac+omepn-ribf').

compound\_name(brendan,'glca+hep+omepn+3ome+6ome-galfnac+omepn-ribf','Ribf-GalfNAc+OMePN-

GlcA+\(Hep+OMePN+3OMe+6OMe\)-X').

%% what form of sugars and side groups are involved in reactions??

```
compound_t('pre-omepn').
compound(brendan,cje,'pre-omepn').
compound_name(brendan,'pre-omepn','Pre-OMePN').
```

```
compound_t('pre-ome').
compound(brendan,cje,'pre-ome').
compound_name(brendan,'pre-ome','Pre-OMe').
```

```
compound_t('pre-galfnac').
compound(brendan,cje,'pre-galfnac').
compound_name(brendan,'pre-galfnac','Pre-GalfNac').
```

```
compound_t('pre-ribf').
compound(brendan,cje,'pre-ribf').
compound_name(brendan,'pre-ribf','Pre-Ribf').
```

```
compound_t('pre-glca').
compound(brendan,cje,'pre-glca').
compound_name(brendan,'pre-glca','Pre-GlcA').
```

```
compound_t('pre-ngro').
compound(brendan,cje,'pre-ngro').
compound_name(brendan,'pre-ngro','Pre-NGro').
```

```
compound_t('pre-etn').
compound(brendan,cje,'pre-etn').
compound_name(brendan,'pre-etn','Pre-Etn').
```

%% Adding glca or glca6ngro or glca6etn to capsule chain

```
subpathway_t(cap_addngro).
subpathway(brendan,cje,cap_addngro,capsule).
subpathway_name(brendan,cje,cap_addngro,'Add NGro').
```

```
subpathway_t(cap_addetn).
subpathway(brendan,cje,cap_addetn,capsule).
subpathway_name(brendan,cje,cap_addetn,'Add EtN').
```

```
reaction_t(capsule_0).
reaction_gene(brendan,cje,capsule_0,cj1441c).
guess_rtn_gene(brendan,cje,capsule_0,cj1441c).
reaction(brendan,cje,capsule_0,'capsule_chain','glca',1).
reaction(brendan,cje,capsule_0,'pre-glca','glca',1).
reaction_pathway(brendan,cje,capsule_0,capsule).
```

```
reaction_t(capsule_ngro0).
reaction_gene(brendan,cje,capsule_ngro0,unknown).
reaction(brendan,cje,capsule_ngro0,'glca','glca6ngro',1).
reaction(brendan,cje,capsule_ngro0,'pre-ngro','glca6ngro',1).
```

```
reaction_subpathway(brendan,cje,capsule_ngro0,cap_addngro).
reaction_pathway(brendan,cje,capsule_ngro0,capsule).
```

```
gene_t(cj1441c).
gene(brendan,cje,cj1441c).
gene_name(brendan,cj1441c,'KfiD').
```

```
%% for glca6ngro
```

```
%% Adding Hep and associated phase-variable modifications
```

```
subpathway_t(cap_addhep).
subpathway(brendan,cje,cap_addhep,capsule).
subpathway_name(brendan,cje,cap_addhep,'Add Hep').
```

```
reaction_t(capsule_ngro1).
reaction_gene(brendan,cje,capsule_ngro1,cj1431c).
reaction(brendan,cje,capsule_ngro1,'glca6ngro','glca6ngro+hep',1).
reaction(brendan,cje,capsule_ngro1,'gdp-d-al-gluco-hep','glca6ngro+hep',1).
reaction_subpathway(brendan,cje,capsule_ngro1,cap_addhep).
reaction_pathway(brendan,cje,capsule_ngro1,capsule).
```

```
reaction_t(capsule_ngro1a).
reaction_gene(brendan,cje,capsule_ngro1a,cj1431c).
reaction(brendan,cje,capsule_ngro1a,'glca6ngro-galfnac','glca6ngro+hep-galfnac',1).
reaction(brendan,cje,capsule_ngro1a,'gdp-d-al-gluco-hep','glca6ngro+hep-galfnac',1).
reaction_subpathway(brendan,cje,capsule_ngro1a,cap_addhep).
reaction_pathway(brendan,cje,capsule_ngro1a,capsule).
```

```
reaction_t(capsule_ngro1b).
reaction_gene(brendan,cje,capsule_ngro1b,cj1431c).
reaction(brendan,cje,capsule_ngro1b,'glca6ngro-galfnac-ribf','glca6ngro+hep-galfnac-ribf',1).
reaction(brendan,cje,capsule_ngro1b,'gdp-d-al-gluco-hep','glca6ngro+hep-galfnac-ribf',1).
reaction_subpathway(brendan,cje,capsule_ngro1b,cap_addhep).
reaction_pathway(brendan,cje,capsule_ngro1b,capsule).
```

```
reaction_t(capsule_ngro1c).
reaction_gene(brendan,cje,capsule_ngro1c,cj1431c).
reaction(brendan,cje,capsule_ngro1c,'glca6ngro-galfnac+omepn-ribf','glca6ngro+hep-galfnac+omepn-ribf',1).
reaction(brendan,cje,capsule_ngro1c,'gdp-d-al-gluco-hep','glca6ngro+hep-galfnac+omepn-ribf',1).
reaction_subpathway(brendan,cje,capsule_ngro1c,cap_addhep).
reaction_pathway(brendan,cje,capsule_ngro1c,capsule).
```

```
gene_t(cj1431c).
gene(brendan,cje,cj1431c).
gene_name(brendan,cj1431c,'HddC').
```

```
subpathway_t(cap_addhep3ome).
subpathway(brendan,cje,cap_addhep3ome,capsule).
subpathway_name(brendan,cje,cap_addhep3ome,'Add Hep 3-OMe').
```

```
subpathway_t(cap_addhep6ome).
```

```
subpathway(brendan,cje,cap_addhep6ome,capsule).
subpathway_name(brendan,cje,cap_addhep6ome,'Add Hep 6-OMe').
```

```
subpathway_t(cap_addhepomepn).
subpathway(brendan,cje,cap_addhepomepn,capsule).
subpathway_name(brendan,cje,cap_addhepomepn,'Add Hep OMePN').
```

```
%% 3-OMe
% ....
```

```
%% OMePN
```

```
reaction_t(capsule_ngro4).
reaction_gene(brendan,cje,capsule_ngro4,cj1422c).
reaction(brendan,cje,capsule_ngro4,'glca6ngro+hep','glca6ngro+hep+omepn',1).
reaction(brendan,cje,capsule_ngro4,'pre-omepn','glca6ngro+hep+omepn',1).
reaction_subpathway(brendan,cje,capsule_ngro4,cap_addhepomepn).
reaction_pathway(brendan,cje,capsule_ngro4,capsule).
```

```
reaction_t(capsule_ngro5a).
reaction_gene(brendan,cje,capsule_ngro5a,cj1422c).
reaction(brendan,cje,capsule_ngro5a,'glca6ngro+hep+6ome','glca6ngro+hep+omepn+6ome',1).
reaction(brendan,cje,capsule_ngro5a,'pre-omepn','glca6ngro+hep+omepn+6ome',1).
reaction_subpathway(brendan,cje,capsule_ngro5a,cap_addhepomepn).
reaction_pathway(brendan,cje,capsule_ngro5a,capsule).
```

```
%% 6-OMe
```

```
reaction_t(capsule_ngro5c).
reaction_gene(brendan,cje,capsule_ngro5c,cj1426c).
reaction(brendan,cje,capsule_ngro5c,'glca6ngro+hep','glca6ngro+hep+6ome',1).
reaction(brendan,cje,capsule_ngro5c,'pre-ome','glca6ngro+hep+6ome',1).
reaction_subpathway(brendan,cje,capsule_ngro5c,cap_addhep6ome).
reaction_pathway(brendan,cje,capsule_ngro5c,capsule).
```

```
reaction_t(capsule_ngro5e).
reaction_gene(brendan,cje,capsule_ngro5e,cj1426c).
reaction(brendan,cje,capsule_ngro5e,'glca6ngro+hep+omepn','glca6ngro+hep+omepn+6ome',1).
reaction(brendan,cje,capsule_ngro5e,'pre-ome','glca6ngro+hep+omepn+6ome',1).
reaction_subpathway(brendan,cje,capsule_ngro5e,cap_addhep6ome).
reaction_pathway(brendan,cje,capsule_ngro5e,capsule).
```

```
%% 3-OMe
```

```
% ...
```

%% OMePN

```
reaction_t(capsule_ngro8).
reaction_gene(brendan,cje,capsule_ngro8,cj1422c).
reaction(brendan,cje,capsule_ngro8,'glca6ngro+hep-galfnac','glca6ngro+hep+omepn-galfnac',1).
reaction(brendan,cje,capsule_ngro8,'pre-omepn','glca6ngro+hep+omepn-galfnac',1).
reaction_subpathway(brendan,cje,capsule_ngro8,cap_addhepomepn).
reaction_pathway(brendan,cje,capsule_ngro8,capsule).
```

```
reaction_t(capsule_ngro9a).
reaction_gene(brendan,cje,capsule_ngro9a,cj1422c).
reaction(brendan,cje,capsule_ngro9a,'glca6ngro+hep+6ome-galfnac','glca6ngro+hep+omepn+6ome-galfnac',1).
reaction(brendan,cje,capsule_ngro9a,'pre-omepn','glca6ngro+hep+omepn+6ome-galfnac',1).
reaction_subpathway(brendan,cje,capsule_ngro9a,cap_addhepomepn).
reaction_pathway(brendan,cje,capsule_ngro9a,capsule).
```

%% 6-OMe

```
reaction_t(capsule_ngro9c).
reaction_gene(brendan,cje,capsule_ngro9c,cj1426c).
reaction(brendan,cje,capsule_ngro9c,'glca6ngro+hep-galfnac','glca6ngro+hep+6ome-galfnac',1).
reaction(brendan,cje,capsule_ngro9c,'pre-ome','glca6ngro+hep+6ome-galfnac',1).
reaction_subpathway(brendan,cje,capsule_ngro9c,cap_addhep6ome).
reaction_pathway(brendan,cje,capsule_ngro9c,capsule).
```

```
reaction_t(capsule_ngro9e).
reaction_gene(brendan,cje,capsule_ngro9e,cj1426c).
reaction(brendan,cje,capsule_ngro9e,'glca6ngro+hep+omepn-galfnac','glca6ngro+hep+omepn+6ome-galfnac',1).
reaction(brendan,cje,capsule_ngro9e,'pre-ome','glca6ngro+hep+omepn+6ome-galfnac',1).
reaction_subpathway(brendan,cje,capsule_ngro9e,cap_addhep6ome).
reaction_pathway(brendan,cje,capsule_ngro9e,capsule).
```

%% 3-OMe

%% OMePN

```
reaction_t(capsule_ngro12).
reaction_gene(brendan,cje,capsule_ngro12,cj1422c).
reaction(brendan,cje,capsule_ngro12,'glca6ngro+hep-galfnac+omepn','glca6ngro+hep+omepn-galfnac+omepn',1).
reaction(brendan,cje,capsule_ngro12,'pre-omepn','glca6ngro+hep+omepn-galfnac+omepn',1).
reaction_subpathway(brendan,cje,capsule_ngro12,cap_addhepomepn).
reaction_pathway(brendan,cje,capsule_ngro12,capsule).
```

```
reaction_t(capsule_ngro13a).
reaction_gene(brendan,cje,capsule_ngro13a,cj1422c).
reaction(brendan,cje,capsule_ngro13a,'glca6ngro+hep+6ome-galfnac+omepn','glca6ngro+hep+omepn+6ome-galfnac+omepn',1).
reaction(brendan,cje,capsule_ngro13a,'pre-omepn','glca6ngro+hep+omepn+6ome-galfnac+omepn',1).
reaction_subpathway(brendan,cje,capsule_ngro13a,cap_addhepomepn).
reaction_pathway(brendan,cje,capsule_ngro13a,capsule).
```

## %% 6-OMe

```
reaction_t(capsule_ngro13c).
reaction_gene(brendan,cje,capsule_ngro13c,cj1426c).
reaction(brendan,cje,capsule_ngro13c,'glca6ngro+hep-galfnac+omepn','glca6ngro+hep+6ome-galfnac+omepn',1).
reaction(brendan,cje,capsule_ngro13c,'pre-ome','glca6ngro+hep+6ome-galfnac+omepn',1).
reaction_subpathway(brendan,cje,capsule_ngro13c,cap_addhep6ome).
reaction_pathway(brendan,cje,capsule_ngro13c,capsule).
```

```
reaction_t(capsule_ngro13e).
reaction_gene(brendan,cje,capsule_ngro13e,cj1426c).
reaction(brendan,cje,capsule_ngro13e,'glca6ngro+hep+omepn-galfnac+omepn','glca6ngro+hep+omepn+6ome-galfnac+omepn',1).
reaction(brendan,cje,capsule_ngro13e,'pre-ome','glca6ngro+hep+omepn+6ome-galfnac+omepn',1).
reaction_subpathway(brendan,cje,capsule_ngro13e,cap_addhep6ome).
reaction_pathway(brendan,cje,capsule_ngro13e,capsule).
```

## %% 3-OMe

## %% OMePN

```
reaction_t(capsule_ngro16).
reaction_gene(brendan,cje,capsule_ngro16,cj1422c).
reaction(brendan,cje,capsule_ngro16,'glca6ngro+hep-galfnac-ribf','glca6ngro+hep+omepn-galfnac-ribf',1).
reaction(brendan,cje,capsule_ngro16,'pre-omepn','glca6ngro+hep+omepn-galfnac-ribf',1).
reaction_subpathway(brendan,cje,capsule_ngro16,cap_addhepomepn).
reaction_pathway(brendan,cje,capsule_ngro16,capsule).
```

```
reaction_t(capsule_ngro17a).
reaction_gene(brendan,cje,capsule_ngro17a,cj1422c).
reaction(brendan,cje,capsule_ngro17a,'glca6ngro+hep+6ome-galfnac-ribf','glca6ngro+hep+omepn+6ome-galfnac-ribf',1).
reaction(brendan,cje,capsule_ngro17a,'pre-omepn','glca6ngro+hep+omepn+6ome-galfnac-ribf',1).
reaction_subpathway(brendan,cje,capsule_ngro17a,cap_addhepomepn).
reaction_pathway(brendan,cje,capsule_ngro17a,capsule).
```

## %% 6-OMe

```
reaction_t(capsule_ngro17c).
reaction_gene(brendan,cje,capsule_ngro17c,cj1426c).
reaction(brendan,cje,capsule_ngro17c,'glca6ngro+hep-galfnac-ribf','glca6ngro+hep+6ome-galfnac-ribf',1).
reaction(brendan,cje,capsule_ngro17c,'pre-ome','glca6ngro+hep+6ome-galfnac-ribf',1).
reaction_subpathway(brendan,cje,capsule_ngro17c,cap_addhep6ome).
reaction_pathway(brendan,cje,capsule_ngro17c,capsule).
```

```
reaction_t(capsule_ngro17e).
reaction_gene(brendan,cje,capsule_ngro17e,cj1426c).
reaction(brendan,cje,capsule_ngro17e,'glca6ngro+hep+omepn-galfnac-ribf','glca6ngro+hep+omepn+6ome-galfnac-ribf',1).
reaction(brendan,cje,capsule_ngro17e,'pre-ome','glca6ngro+hep+omepn+6ome-galfnac-ribf',1).
reaction_subpathway(brendan,cje,capsule_ngro17e,cap_addhep6ome).
```

reaction\_pathway(brendan,cje,capsule\_ngro17e,capsule).

%% 3-OMe

%% OMePN

reaction\_t(capsule\_ngro20).

reaction\_gene(brendan,cje,capsule\_ngro20,cj1422c).

reaction(brendan,cje,capsule\_ngro20,'glca6ngro+hep-galfnac+omepn-ribf','glca6ngro+hep+omepn-galfnac+omepn-ribf',1).

reaction(brendan,cje,capsule\_ngro20,'pre-omepn','glca6ngro+hep+omepn-galfnac+omepn-ribf',1).

reaction\_subpathway(brendan,cje,capsule\_ngro20,cap\_addhepomepn).

reaction\_pathway(brendan,cje,capsule\_ngro20,capsule).

reaction\_t(capsule\_ngro21a).

reaction\_gene(brendan,cje,capsule\_ngro21a,cj1422c).

reaction(brendan,cje,capsule\_ngro21a,'glca6ngro+hep+6ome-galfnac+omepn-ribf','glca6ngro+hep+omepn+6ome-galfnac+omepn-ribf',1).

reaction(brendan,cje,capsule\_ngro21a,'pre-omepn','glca6ngro+hep+omepn+6ome-galfnac+omepn-ribf',1).

reaction\_subpathway(brendan,cje,capsule\_ngro21a,cap\_addhepomepn).

reaction\_pathway(brendan,cje,capsule\_ngro21a,capsule).

%% 6-OMe

reaction\_t(capsule\_ngro21c).

reaction\_gene(brendan,cje,capsule\_ngro21c,cj1426c).

reaction(brendan,cje,capsule\_ngro21c,'glca6ngro+hep-galfnac+omepn-ribf','glca6ngro+hep+6ome-galfnac+omepn-ribf',1).

reaction(brendan,cje,capsule\_ngro21c,'pre-ome','glca6ngro+hep+6ome-galfnac+omepn-ribf',1).

reaction\_subpathway(brendan,cje,capsule\_ngro21c,cap\_addhep6ome).

reaction\_pathway(brendan,cje,capsule\_ngro21c,capsule).

reaction\_t(capsule\_ngro21e).

reaction\_gene(brendan,cje,capsule\_ngro21e,cj1426c).

reaction(brendan,cje,capsule\_ngro21e,'glca6ngro+hep+omepn-galfnac+omepn-ribf','glca6ngro+hep+omepn+6ome-galfnac+omepn-ribf',1).

reaction(brendan,cje,capsule\_ngro21e,'pre-ome','glca6ngro+hep+omepn+6ome-galfnac+omepn-ribf',1).

reaction\_subpathway(brendan,cje,capsule\_ngro21e,cap\_addhep6ome).

reaction\_pathway(brendan,cje,capsule\_ngro21e,capsule).

gene\_t(cj1422c).

gene(brendan,cje,cj1422c).

gene\_name(brendan,cj1422c,'putative sugar transferase').

gene\_t(cj1426c).

gene(brendan,cje,cj1426c).

gene\_name(brendan,cj1426c,'putative methyltransferase family protein').

gene\_t(unknown).



```
gene(brendan,cje,unknown).
gene_name(brendan,unknown,'Unknown gene or spontaneous reaction').
```

```
%% Adding galfnac and associated phase-variable modification
```

```
subpathway_t(cap_addgalf).
subpathway(brendan,cje,cap_addgalf,capsule).
subpathway_name(brendan,cje,cap_addgalf,'Add Galfnac').
```

```
reaction_t(capsule_ngro22).
reaction_gene(brendan,cje,capsule_ngro22,cj1439c).
guess_rtn_gene(brendan,cje,capsule_ngro22,cj1439c).
reaction(brendan,cje,capsule_ngro22,'glca6ngro','glca6ngro-galfnac',1).
reaction(brendan,cje,capsule_ngro22,'pre-galfnac','glca6ngro-galfnac',1).
reaction_subpathway(brendan,cje,capsule_ngro22,cap_addgalf).
reaction_pathway(brendan,cje,capsule_ngro22,capsule).
```

```
reaction_t(capsule_ngro23).
reaction_gene(brendan,cje,capsule_ngro23,cj1439c).
guess_rtn_gene(brendan,cje,capsule_ngro23,cj1439c).
reaction(brendan,cje,capsule_ngro23,'glca6ngro+hep','glca6ngro+hep-galfnac',1).
reaction(brendan,cje,capsule_ngro23,'pre-galfnac','glca6ngro+hep-galfnac',1).
reaction_subpathway(brendan,cje,capsule_ngro23,cap_addgalf).
reaction_pathway(brendan,cje,capsule_ngro23,capsule).
```

```
reaction_t(capsule_ngro24a).
reaction_gene(brendan,cje,capsule_ngro24a,cj1439c).
guess_rtn_gene(brendan,cje,capsule_ngro24a,cj1439c).
reaction(brendan,cje,capsule_ngro24a,'glca6ngro+hep+6ome','glca6ngro+hep+6ome-galfnac',1).
reaction(brendan,cje,capsule_ngro24a,'pre-galfnac','glca6ngro+hep+6ome-galfnac',1).
reaction_subpathway(brendan,cje,capsule_ngro24a,cap_addgalf).
reaction_pathway(brendan,cje,capsule_ngro24a,capsule).
```

```
reaction_t(capsule_ngro25).
reaction_gene(brendan,cje,capsule_ngro25,cj1439c).
guess_rtn_gene(brendan,cje,capsule_ngro25,cj1439c).
reaction(brendan,cje,capsule_ngro25,'glca6ngro+hep+omepn','glca6ngro+hep+omepn-galfnac',1).
reaction(brendan,cje,capsule_ngro25,'pre-galfnac','glca6ngro+hep+omepn-galfnac',1).
reaction_subpathway(brendan,cje,capsule_ngro25,cap_addgalf).
reaction_pathway(brendan,cje,capsule_ngro25,capsule).
```

```
reaction_t(capsule_ngro26a).
reaction_gene(brendan,cje,capsule_ngro26a,cj1439c).
guess_rtn_gene(brendan,cje,capsule_ngro26a,cj1439c).
reaction(brendan,cje,capsule_ngro26a,'glca6ngro+hep+omepn+6ome','glca6ngro+hep+omepn+6ome-galfnac',1).
reaction(brendan,cje,capsule_ngro26a,'pre-galfnac','glca6ngro+hep+omepn+6ome-galfnac',1).
reaction_subpathway(brendan,cje,capsule_ngro26a,cap_addgalf).
reaction_pathway(brendan,cje,capsule_ngro26a,capsule).
```

```
gene_t(cj1439c).
gene(brendan,cje,cj1439c).
gene_name(brendan,cj1439c,'Glf').
```

subpathway\_t(cap\_addgalfomepn).  
subpathway(brendan,cje,cap\_addgalfomepn,capsule).  
subpathway\_name(brendan,cje,cap\_addgalfomepn,'Add Galfnac OMePN').

reaction\_t(capsule\_ngro27).  
reaction\_gene(brendan,cje,capsule\_ngro27,cj1421c).  
reaction(brendan,cje,capsule\_ngro27,'glca6ngro-galfnac','glca6ngro-galfnac+omepn',1).  
reaction(brendan,cje,capsule\_ngro27,'pre-omepn','glca6ngro-galfnac+omepn',1).  
reaction\_subpathway(brendan,cje,capsule\_ngro27,cap\_addgalfomepn).  
reaction\_pathway(brendan,cje,capsule\_ngro27,capsule).

reaction\_t(capsule\_ngro28).  
reaction\_gene(brendan,cje,capsule\_ngro28,cj1421c).  
reaction(brendan,cje,capsule\_ngro28,'glca6ngro+hep-galfnac','glca6ngro+hep-galfnac+omepn',1).  
reaction(brendan,cje,capsule\_ngro28,'pre-omepn','glca6ngro+hep-galfnac+omepn',1).  
reaction\_subpathway(brendan,cje,capsule\_ngro28,cap\_addgalfomepn).  
reaction\_pathway(brendan,cje,capsule\_ngro28,capsule).

reaction\_t(capsule\_ngro29a).  
reaction\_gene(brendan,cje,capsule\_ngro29a,cj1421c).  
reaction(brendan,cje,capsule\_ngro29a,'glca6ngro+hep+6ome-galfnac','glca6ngro+hep+6ome-galfnac+omepn',1).  
reaction(brendan,cje,capsule\_ngro29a,'pre-omepn','glca6ngro+hep+6ome-galfnac+omepn',1).  
reaction\_subpathway(brendan,cje,capsule\_ngro29a,cap\_addgalfomepn).  
reaction\_pathway(brendan,cje,capsule\_ngro29a,capsule).

reaction\_t(capsule\_ngro30).  
reaction\_gene(brendan,cje,capsule\_ngro30,cj1421c).  
reaction(brendan,cje,capsule\_ngro30,'glca6ngro+hep+omepn-galfnac','glca6ngro+hep+omepn-galfnac+omepn',1).  
reaction(brendan,cje,capsule\_ngro30,'pre-omepn','glca6ngro+hep+omepn-galfnac+omepn',1).  
reaction\_subpathway(brendan,cje,capsule\_ngro30,cap\_addgalfomepn).  
reaction\_pathway(brendan,cje,capsule\_ngro30,capsule).

reaction\_t(capsule\_ngro31a).  
reaction\_gene(brendan,cje,capsule\_ngro31a,cj1421c).  
reaction(brendan,cje,capsule\_ngro31a,'glca6ngro+hep+omepn+6ome-galfnac','glca6ngro+hep+omepn+6ome-galfnac+omepn',1).  
reaction(brendan,cje,capsule\_ngro31a,'pre-omepn','glca6ngro+hep+omepn+6ome-galfnac+omepn',1).  
reaction\_subpathway(brendan,cje,capsule\_ngro31a,cap\_addgalfomepn).  
reaction\_pathway(brendan,cje,capsule\_ngro31a,capsule).

reaction\_t(capsule\_ngro32).  
reaction\_gene(brendan,cje,capsule\_ngro32,cj1421c).  
reaction(brendan,cje,capsule\_ngro32,'glca6ngro-galfnac-ribf','glca6ngro-galfnac+omepn-ribf',1).  
reaction(brendan,cje,capsule\_ngro32,'pre-omepn','glca6ngro-galfnac+omepn-ribf',1).  
reaction\_subpathway(brendan,cje,capsule\_ngro32,cap\_addgalfomepn).  
reaction\_pathway(brendan,cje,capsule\_ngro32,capsule).

reaction\_t(capsule\_ngro33).  
reaction\_gene(brendan,cje,capsule\_ngro33,cj1421c).  
reaction(brendan,cje,capsule\_ngro33,'glca6ngro+hep-galfnac-ribf','glca6ngro+hep-galfnac+omepn-ribf',1).  
reaction(brendan,cje,capsule\_ngro33,'pre-omepn','glca6ngro+hep-galfnac+omepn-ribf',1).  
reaction\_subpathway(brendan,cje,capsule\_ngro33,cap\_addgalfomepn).

reaction\_pathway(brendan,cje,capsule\_ngro33,capsule).

reaction\_t(capsule\_ngro34a).

reaction\_gene(brendan,cje,capsule\_ngro34a,cj1421c).

reaction(brendan,cje,capsule\_ngro34a,'glca6ngro+hep+6ome-galfnac-ribf','glca6ngro+hep+6ome-galfnac+omepn-ribf',1).

reaction(brendan,cje,capsule\_ngro34a,'pre-omepn','glca6ngro+hep+6ome-galfnac+omepn-ribf',1).

reaction\_subpathway(brendan,cje,capsule\_ngro34a,cap\_addgalfomepn).

reaction\_pathway(brendan,cje,capsule\_ngro34a,capsule).

reaction\_t(capsule\_ngro35).

reaction\_gene(brendan,cje,capsule\_ngro35,cj1421c).

reaction(brendan,cje,capsule\_ngro35,'glca6ngro+hep+omepn-galfnac-ribf','glca6ngro+hep+omepn-galfnac+omepn-ribf',1).

reaction(brendan,cje,capsule\_ngro35,'pre-omepn','glca6ngro+hep+omepn-galfnac+omepn-ribf',1).

reaction\_subpathway(brendan,cje,capsule\_ngro35,cap\_addgalfomepn).

reaction\_pathway(brendan,cje,capsule\_ngro35,capsule).

reaction\_t(capsule\_ngro36a).

reaction\_gene(brendan,cje,capsule\_ngro36a,cj1421c).

reaction(brendan,cje,capsule\_ngro36a,'glca6ngro+hep+omepn+6ome-galfnac-ribf','glca6ngro+hep+omepn+6ome-galfnac+omepn-ribf',1).

reaction(brendan,cje,capsule\_ngro36a,'pre-omepn','glca6ngro+hep+omepn+6ome-galfnac+omepn-ribf',1).

reaction\_subpathway(brendan,cje,capsule\_ngro36a,cap\_addgalfomepn).

reaction\_pathway(brendan,cje,capsule\_ngro36a,capsule).

gene\_t(cj1421c).

gene(brendan,cje,cj1421c).

gene\_name(brendan,cj1421c,'putative sugar transferase').

%% Adding ribf

subpathway\_t(cap\_addribf).

subpathway(brendan,cje,cap\_addribf,capsule).

subpathway\_name(brendan,cje,cap\_addribf,'Add Ribf').

reaction\_t(capsule\_ngro37).

reaction\_gene(brendan,cje,capsule\_ngro37,unknown).

reaction(brendan,cje,capsule\_ngro37,'glca6ngro-galfnac','glca6ngro-galfnac-ribf',1).

reaction(brendan,cje,capsule\_ngro37,'pre-ribf','glca6ngro-galfnac-ribf',1).

reaction\_subpathway(brendan,cje,capsule\_ngro37,cap\_addribf).

reaction\_pathway(brendan,cje,capsule\_ngro37,capsule).

reaction\_t(capsule\_ngro38).

reaction\_gene(brendan,cje,capsule\_ngro38,unknown).

reaction(brendan,cje,capsule\_ngro38,'glca6ngro+hep-galfnac','glca6ngro+hep-galfnac-ribf',1).

reaction(brendan,cje,capsule\_ngro38,'pre-ribf','glca6ngro+hep-galfnac-ribf',1).

reaction\_subpathway(brendan,cje,capsule\_ngro38,cap\_addribf).

reaction\_pathway(brendan,cje,capsule\_ngro38,capsule).

reaction\_t(capsule\_ngro39a).

reaction\_gene(brendan,cje,capsule\_ngro39a,unknown).

reaction(brendan,cje,capsule\_ngro39a,'glca6ngro+hep+6ome-galfnac','glca6ngro+hep+6ome-galfnac-ribf',1).

reaction(brendan,cje,capsule\_ngro39a,'pre-ribf','glca6ngro+hep+6ome-galfnac-ribf',1).

reaction\_subpathway(brendan,cje,capsule\_ngro39a,cap\_addribf).  
reaction\_pathway(brendan,cje,capsule\_ngro39a,capsule).

reaction\_t(capsule\_ngro40).  
reaction\_gene(brendan,cje,capsule\_ngro40,unknown).  
reaction(brendan,cje,capsule\_ngro40,'glca6ngro+hep+omepn-galfnac','glca6ngro+hep+omepn-galfnac-ribf',1).  
reaction(brendan,cje,capsule\_ngro40,'pre-ribf','glca6ngro+hep+omepn-galfnac-ribf',1).  
reaction\_subpathway(brendan,cje,capsule\_ngro40,cap\_addribf).  
reaction\_pathway(brendan,cje,capsule\_ngro40,capsule).

reaction\_t(capsule\_ngro41a).  
reaction\_gene(brendan,cje,capsule\_ngro41a,unknown).  
reaction(brendan,cje,capsule\_ngro41a,'glca6ngro+hep+omepn+6ome-galfnac','glca6ngro+hep+omepn+6ome-galfnac-ribf',1).  
reaction(brendan,cje,capsule\_ngro41a,'pre-ribf','glca6ngro+hep+omepn+6ome-galfnac-ribf',1).  
reaction\_subpathway(brendan,cje,capsule\_ngro41a,cap\_addribf).  
reaction\_pathway(brendan,cje,capsule\_ngro41a,capsule).

reaction\_t(capsule\_ngro42).  
reaction\_gene(brendan,cje,capsule\_ngro42,unknown).  
reaction(brendan,cje,capsule\_ngro42,'glca6ngro-galfnac+omepn','glca6ngro-galfnac+omepn-ribf',1).  
reaction(brendan,cje,capsule\_ngro42,'pre-ribf','glca6ngro-galfnac+omepn-ribf',1).  
reaction\_subpathway(brendan,cje,capsule\_ngro42,cap\_addribf).  
reaction\_pathway(brendan,cje,capsule\_ngro42,capsule).

reaction\_t(capsule\_ngro43).  
reaction\_gene(brendan,cje,capsule\_ngro43,unknown).  
reaction(brendan,cje,capsule\_ngro43,'glca6ngro+hep-galfnac+omepn','glca6ngro+hep-galfnac+omepn-ribf',1).  
reaction(brendan,cje,capsule\_ngro43,'pre-ribf','glca6ngro+hep-galfnac+omepn-ribf',1).  
reaction\_subpathway(brendan,cje,capsule\_ngro43,cap\_addribf).  
reaction\_pathway(brendan,cje,capsule\_ngro43,capsule).

reaction\_t(capsule\_ngro44a).  
reaction\_gene(brendan,cje,capsule\_ngro44a,unknown).  
reaction(brendan,cje,capsule\_ngro44a,'glca6ngro+hep+6ome-galfnac+omepn','glca6ngro+hep+6ome-galfnac+omepn-ribf',1).  
reaction(brendan,cje,capsule\_ngro44a,'pre-ribf','glca6ngro+hep+6ome-galfnac+omepn-ribf',1).  
reaction\_subpathway(brendan,cje,capsule\_ngro44a,cap\_addribf).  
reaction\_pathway(brendan,cje,capsule\_ngro44a,capsule).

reaction\_t(capsule\_ngro45).  
reaction\_gene(brendan,cje,capsule\_ngro45,unknown).  
reaction(brendan,cje,capsule\_ngro45,'glca6ngro+hep+omepn-galfnac+omepn','glca6ngro+hep+omepn-galfnac+omepn-ribf',1).  
reaction(brendan,cje,capsule\_ngro45,'pre-ribf','glca6ngro+hep+omepn-galfnac+omepn-ribf',1).  
reaction\_subpathway(brendan,cje,capsule\_ngro45,cap\_addribf).  
reaction\_pathway(brendan,cje,capsule\_ngro45,capsule).

reaction\_t(capsule\_ngro46a).  
reaction\_gene(brendan,cje,capsule\_ngro46a,unknown).  
reaction(brendan,cje,capsule\_ngro46a,'glca6ngro+hep+omepn+6ome-galfnac+omepn','glca6ngro+hep+omepn+6ome-galfnac+omepn-ribf',1).  
reaction(brendan,cje,capsule\_ngro46a,'pre-ribf','glca6ngro+hep+omepn+6ome-galfnac+omepn-ribf',1).  
reaction\_subpathway(brendan,cje,capsule\_ngro46a,cap\_addribf).

reaction\_pathway(brendan,cje,capsule\_ngro46a,capsule).

%% now for glca6etn

% .....

%% now for glca

%% Adding Hep and associated phase-variable modifications

reaction\_t(capsule\_1).  
reaction\_gene(brendan,cje,capsule\_1,cj1431c).  
reaction(brendan,cje,capsule\_1,'glca','glca+hep',1).  
reaction(brendan,cje,capsule\_1,'gdp-d-al-gluco-hep','glca+hep',1).  
reaction\_subpathway(brendan,cje,capsule\_1,cap\_addhep).  
reaction\_pathway(brendan,cje,capsule\_1,capsule).

reaction\_t(capsule\_1a).  
reaction\_gene(brendan,cje,capsule\_1a,cj1431c).  
reaction(brendan,cje,capsule\_1a,'glca-galfnac','glca+hep-galfnac',1).  
reaction(brendan,cje,capsule\_1a,'gdp-d-al-gluco-hep','glca+hep-galfnac',1).  
reaction\_subpathway(brendan,cje,capsule\_1a,cap\_addhep).  
reaction\_pathway(brendan,cje,capsule\_1a,capsule).

reaction\_t(capsule\_1b).  
reaction\_gene(brendan,cje,capsule\_1b,cj1431c).  
reaction(brendan,cje,capsule\_1b,'glca-galfnac-ribf','glca+hep-galfnac-ribf',1).  
reaction(brendan,cje,capsule\_1b,'gdp-d-al-gluco-hep','glca+hep-galfnac-ribf',1).  
reaction\_subpathway(brendan,cje,capsule\_1b,cap\_addhep).  
reaction\_pathway(brendan,cje,capsule\_1b,capsule).

reaction\_t(capsule\_1c).  
reaction\_gene(brendan,cje,capsule\_1c,cj1431c).  
reaction(brendan,cje,capsule\_1c,'glca-galfnac+omepn-ribf','glca+hep-galfnac+omepn-ribf',1).  
reaction(brendan,cje,capsule\_1c,'gdp-d-al-gluco-hep','glca+hep-galfnac+omepn-ribf',1).  
reaction\_subpathway(brendan,cje,capsule\_1c,cap\_addhep).  
reaction\_pathway(brendan,cje,capsule\_1c,capsule).

%% 3-OMe

%% OMePN

reaction\_t(capsule\_4).  
reaction\_gene(brendan,cje,capsule\_4,cj1422c).  
reaction(brendan,cje,capsule\_4,'glca+hep','glca+hep+omepn',1).  
reaction(brendan,cje,capsule\_4,'pre-omepn','glca+hep+omepn',1).  
reaction\_subpathway(brendan,cje,capsule\_4,cap\_addhepomepn).  
reaction\_pathway(brendan,cje,capsule\_4,capsule).

reaction\_t(capsule\_5a).  
reaction\_gene(brendan,cje,capsule\_5a,cj1422c).  
reaction(brendan,cje,capsule\_5a,'glca+hep+6ome','glca+hep+omepn+6ome',1).  
reaction(brendan,cje,capsule\_5a,'pre-omepn','glca+hep+omepn+6ome',1).

reaction\_subpathway(brendan,cje,capsule\_5a,cap\_addhepomepn).  
reaction\_pathway(brendan,cje,capsule\_5a,capsule).

%% 6-OMe

reaction\_t(capsule\_5c).  
reaction\_gene(brendan,cje,capsule\_5c,cj1426c).  
reaction(brendan,cje,capsule\_5c,'glca+hep','glca+hep+6ome',1).  
reaction(brendan,cje,capsule\_5c,'pre-ome','glca+hep+6ome',1).  
reaction\_subpathway(brendan,cje,capsule\_5c,cap\_addhep6ome).  
reaction\_pathway(brendan,cje,capsule\_5c,capsule).

reaction\_t(capsule\_5e).  
reaction\_gene(brendan,cje,capsule\_5e,cj1426c).  
reaction(brendan,cje,capsule\_5e,'glca+hep+omepn','glca+hep+omepn+6ome',1).  
reaction(brendan,cje,capsule\_5e,'pre-ome','glca+hep+omepn+6ome',1).  
reaction\_subpathway(brendan,cje,capsule\_5e,cap\_addhep6ome).  
reaction\_pathway(brendan,cje,capsule\_5e,capsule).

%% 3-OMe

%% OMePN

reaction\_t(capsule\_8).  
reaction\_gene(brendan,cje,capsule\_8,cj1422c).  
reaction(brendan,cje,capsule\_8,'glca+hep-galfnac','glca+hep+omepn-galfnac',1).  
reaction(brendan,cje,capsule\_8,'pre-omepn','glca+hep+omepn-galfnac',1).  
reaction\_subpathway(brendan,cje,capsule\_8,cap\_addhepomepn).  
reaction\_pathway(brendan,cje,capsule\_8,capsule).

reaction\_t(capsule\_9a).  
reaction\_gene(brendan,cje,capsule\_9a,cj1422c).  
reaction(brendan,cje,capsule\_9a,'glca+hep+6ome-galfnac','glca+hep+omepn+6ome-galfnac',1).  
reaction(brendan,cje,capsule\_9a,'pre-omepn','glca+hep+omepn+6ome-galfnac',1).  
reaction\_subpathway(brendan,cje,capsule\_9a,cap\_addhepomepn).  
reaction\_pathway(brendan,cje,capsule\_9a,capsule).

%% 6-OMe

reaction\_t(capsule\_9c).  
reaction\_gene(brendan,cje,capsule\_9c,cj1426c).  
reaction(brendan,cje,capsule\_9c,'glca+hep-galfnac','glca+hep+6ome-galfnac',1).  
reaction(brendan,cje,capsule\_9c,'pre-ome','glca+hep+6ome-galfnac',1).  
reaction\_subpathway(brendan,cje,capsule\_9c,cap\_addhep6ome).  
reaction\_pathway(brendan,cje,capsule\_9c,capsule).

reaction\_t(capsule\_9e).  
reaction\_gene(brendan,cje,capsule\_9e,cj1426c).  
reaction(brendan,cje,capsule\_9e,'glca+hep+omepn-galfnac','glca+hep+omepn+6ome-galfnac',1).  
reaction(brendan,cje,capsule\_9e,'pre-ome','glca+hep+omepn+6ome-galfnac',1).  
reaction\_subpathway(brendan,cje,capsule\_9e,cap\_addhep6ome).  
reaction\_pathway(brendan,cje,capsule\_9e,capsule).

%% 3-OMe

%% OMePN

reaction\_t(capsule\_12).  
reaction\_gene(brendan,cje,capsule\_12,cj1422c).  
reaction(brendan,cje,capsule\_12,'glca+hep-galfnac+omepn','glca+hep+omepn-galfnac+omepn',1).  
reaction(brendan,cje,capsule\_12,'pre-omepn','glca+hep+omepn-galfnac+omepn',1).  
reaction\_subpathway(brendan,cje,capsule\_12,cap\_addhepomepn).  
reaction\_pathway(brendan,cje,capsule\_12,capsule).

reaction\_t(capsule\_13a).  
reaction\_gene(brendan,cje,capsule\_13a,cj1422c).  
reaction(brendan,cje,capsule\_13a,'glca+hep+6ome-galfnac+omepn','glca+hep+omepn+6ome-galfnac+omepn',1).  
reaction(brendan,cje,capsule\_13a,'pre-omepn','glca+hep+omepn+6ome-galfnac+omepn',1).  
reaction\_subpathway(brendan,cje,capsule\_13a,cap\_addhepomepn).  
reaction\_pathway(brendan,cje,capsule\_13a,capsule).

%% 6-OMe

reaction\_t(capsule\_13c).  
reaction\_gene(brendan,cje,capsule\_13c,cj1426c).  
reaction(brendan,cje,capsule\_13c,'glca+hep-galfnac+omepn','glca+hep+6ome-galfnac+omepn',1).  
reaction(brendan,cje,capsule\_13c,'pre-ome','glca+hep+6ome-galfnac+omepn',1).  
reaction\_subpathway(brendan,cje,capsule\_13c,cap\_addhep6ome).  
reaction\_pathway(brendan,cje,capsule\_13c,capsule).

reaction\_t(capsule\_13e).  
reaction\_gene(brendan,cje,capsule\_13e,cj1426c).  
reaction(brendan,cje,capsule\_13e,'glca+hep+omepn-galfnac+omepn','glca+hep+omepn+6ome-galfnac+omepn',1).  
reaction(brendan,cje,capsule\_13e,'pre-ome','glca+hep+omepn+6ome-galfnac+omepn',1).  
reaction\_subpathway(brendan,cje,capsule\_13e,cap\_addhep6ome).  
reaction\_pathway(brendan,cje,capsule\_13e,capsule).

%% 3-OMe

%% OMePN

reaction\_t(capsule\_16).  
reaction\_gene(brendan,cje,capsule\_16,cj1422c).  
reaction(brendan,cje,capsule\_16,'glca+hep-galfnac-ribf','glca+hep+omepn-galfnac-ribf',1).  
reaction(brendan,cje,capsule\_16,'pre-omepn','glca+hep+omepn-galfnac-ribf',1).  
reaction\_subpathway(brendan,cje,capsule\_16,cap\_addhepomepn).  
reaction\_pathway(brendan,cje,capsule\_16,capsule).

reaction\_t(capsule\_17a).  
reaction\_gene(brendan,cje,capsule\_17a,cj1422c).  
reaction(brendan,cje,capsule\_17a,'glca+hep+6ome-galfnac-ribf','glca+hep+omepn+6ome-galfnac-ribf',1).  
reaction(brendan,cje,capsule\_17a,'pre-omepn','glca+hep+omepn+6ome-galfnac-ribf',1).  
reaction\_subpathway(brendan,cje,capsule\_17a,cap\_addhepomepn).  
reaction\_pathway(brendan,cje,capsule\_17a,capsule).

%% 6-OMe

reaction\_t(capsule\_17c).

reaction\_gene(brendan,cje,capsule\_17c,cj1426c).  
reaction(brendan,cje,capsule\_17c,'glca+hep-galfnac-ribf','glca+hep+6ome-galfnac-ribf',1).  
reaction(brendan,cje,capsule\_17c,'pre-ome','glca+hep+6ome-galfnac-ribf',1).  
reaction\_subpathway(brendan,cje,capsule\_17c,cap\_addhep6ome).  
reaction\_pathway(brendan,cje,capsule\_17c,capsule).

reaction\_t(capsule\_17e).  
reaction\_gene(brendan,cje,capsule\_17e,cj1426c).  
reaction(brendan,cje,capsule\_17e,'glca+hep+omepn-galfnac-ribf','glca+hep+omepn+6ome-galfnac-ribf',1).  
reaction(brendan,cje,capsule\_17e,'pre-ome','glca+hep+omepn+6ome-galfnac-ribf',1).  
reaction\_subpathway(brendan,cje,capsule\_17e,cap\_addhep6ome).  
reaction\_pathway(brendan,cje,capsule\_17e,capsule).

%% 3-OMe

%% OMePN

reaction\_t(capsule\_20).  
reaction\_gene(brendan,cje,capsule\_20,cj1422c).  
reaction(brendan,cje,capsule\_20,'glca+hep-galfnac+omepn-ribf','glca+hep+omepn-galfnac+omepn-ribf',1).  
reaction(brendan,cje,capsule\_20,'pre-omepn','glca+hep+omepn-galfnac+omepn-ribf',1).  
reaction\_subpathway(brendan,cje,capsule\_20,cap\_addhepomepn).  
reaction\_pathway(brendan,cje,capsule\_20,capsule).

reaction\_t(capsule\_21a).  
reaction\_gene(brendan,cje,capsule\_21a,cj1422c).  
reaction(brendan,cje,capsule\_21a,'glca+hep+6ome-galfnac+omepn-ribf','glca+hep+omepn+6ome-galfnac+omepn-ribf',1).  
reaction(brendan,cje,capsule\_21a,'pre-omepn','glca+hep+omepn+6ome-galfnac+omepn-ribf',1).  
reaction\_subpathway(brendan,cje,capsule\_21a,cap\_addhepomepn).  
reaction\_pathway(brendan,cje,capsule\_21a,capsule).

%% 6-OMe

reaction\_t(capsule\_21c).  
reaction\_gene(brendan,cje,capsule\_21c,cj1426c).  
reaction(brendan,cje,capsule\_21c,'glca+hep-galfnac+omepn-ribf','glca+hep+6ome-galfnac+omepn-ribf',1).  
reaction(brendan,cje,capsule\_21c,'pre-ome','glca+hep+6ome-galfnac+omepn-ribf',1).  
reaction\_subpathway(brendan,cje,capsule\_21c,cap\_addhep6ome).  
reaction\_pathway(brendan,cje,capsule\_21c,capsule).

reaction\_t(capsule\_21e).  
reaction\_gene(brendan,cje,capsule\_21e,cj1426c).  
reaction(brendan,cje,capsule\_21e,'glca+hep+omepn-galfnac+omepn-ribf','glca+hep+omepn+6ome-galfnac+omepn-ribf',1).  
reaction(brendan,cje,capsule\_21e,'pre-ome','glca+hep+omepn+6ome-galfnac+omepn-ribf',1).  
reaction\_subpathway(brendan,cje,capsule\_21e,cap\_addhep6ome).  
reaction\_pathway(brendan,cje,capsule\_21e,capsule).



%% Adding galfnac and associated phase-variable modification

```
reaction_t(capsule_22).
reaction_gene(brendan,cje,capsule_22,cj1439c).
guess_rtn_gene(brendan,cje,capsule_22,cj1439c).
reaction(brendan,cje,capsule_22,'glca','glca-galfnac',1).
reaction(brendan,cje,capsule_22,'pre-galfnac','glca-galfnac',1).
reaction_subpathway(brendan,cje,capsule_22,cap_addgalf).
reaction_pathway(brendan,cje,capsule_22,capsule).
```

```
reaction_t(capsule_23).
reaction_gene(brendan,cje,capsule_23,cj1439c).
guess_rtn_gene(brendan,cje,capsule_23,cj1439c).
reaction(brendan,cje,capsule_23,'glca+hep','glca+hep-galfnac',1).
reaction(brendan,cje,capsule_23,'pre-galfnac','glca+hep-galfnac',1).
reaction_subpathway(brendan,cje,capsule_23,cap_addgalf).
reaction_pathway(brendan,cje,capsule_23,capsule).
```

```
reaction_t(capsule_24a).
reaction_gene(brendan,cje,capsule_24a,cj1439c).
guess_rtn_gene(brendan,cje,capsule_24a,cj1439c).
reaction(brendan,cje,capsule_24a,'glca+hep+6ome','glca+hep+6ome-galfnac',1).
reaction(brendan,cje,capsule_24a,'pre-galfnac','glca+hep+6ome-galfnac',1).
reaction_subpathway(brendan,cje,capsule_24a,cap_addgalf).
reaction_pathway(brendan,cje,capsule_24a,capsule).
```

```
reaction_t(capsule_25).
reaction_gene(brendan,cje,capsule_25,cj1439c).
guess_rtn_gene(brendan,cje,capsule_25,cj1439c).
reaction(brendan,cje,capsule_25,'glca+hep+omepn','glca+hep+omepn-galfnac',1).
reaction(brendan,cje,capsule_25,'pre-galfnac','glca+hep+omepn-galfnac',1).
reaction_subpathway(brendan,cje,capsule_25,cap_addgalf).
reaction_pathway(brendan,cje,capsule_25,capsule).
```

```
reaction_t(capsule_26a).
reaction_gene(brendan,cje,capsule_26a,cj1439c).
guess_rtn_gene(brendan,cje,capsule_26a,cj1439c).
reaction(brendan,cje,capsule_26a,'glca+hep+omepn+6ome','glca+hep+omepn+6ome-galfnac',1).
reaction(brendan,cje,capsule_26a,'pre-galfnac','glca+hep+omepn+6ome-galfnac',1).
reaction_subpathway(brendan,cje,capsule_26a,cap_addgalf).
reaction_pathway(brendan,cje,capsule_26a,capsule).
```

```
reaction_t(capsule_27).
reaction_gene(brendan,cje,capsule_27,cj1421c).
reaction(brendan,cje,capsule_27,'glca-galfnac','glca-galfnac+omepn',1).
reaction(brendan,cje,capsule_27,'pre-omepn','glca-galfnac+omepn',1).
reaction_subpathway(brendan,cje,capsule_27,cap_addgalfomepn).
reaction_pathway(brendan,cje,capsule_27,capsule).
```

```
reaction_t(capsule_28).
reaction_gene(brendan,cje,capsule_28,cj1421c).
reaction(brendan,cje,capsule_28,'glca+hep-galfnac','glca+hep-galfnac+omepn',1).
```

reaction(brendan,cje,capsule\_28,'pre-omepn','glca+hep-galfnac+omepn',1).  
reaction\_subpathway(brendan,cje,capsule\_28,cap\_addgalfomepn).  
reaction\_pathway(brendan,cje,capsule\_28,capsule).

reaction\_t(capsule\_29a).  
reaction\_gene(brendan,cje,capsule\_29a,cj1421c).  
reaction(brendan,cje,capsule\_29a,'glca+hep+6ome-galfnac','glca+hep+6ome-galfnac+omepn',1).  
reaction(brendan,cje,capsule\_29a,'pre-omepn','glca+hep+6ome-galfnac+omepn',1).  
reaction\_subpathway(brendan,cje,capsule\_29a,cap\_addgalfomepn).  
reaction\_pathway(brendan,cje,capsule\_29a,capsule).

reaction\_t(capsule\_30).  
reaction\_gene(brendan,cje,capsule\_30,cj1421c).  
reaction(brendan,cje,capsule\_30,'glca+hep+omepn-galfnac','glca+hep+omepn-galfnac+omepn',1).  
reaction(brendan,cje,capsule\_30,'pre-omepn','glca+hep+omepn-galfnac+omepn',1).  
reaction\_subpathway(brendan,cje,capsule\_30,cap\_addgalfomepn).  
reaction\_pathway(brendan,cje,capsule\_30,capsule).

reaction\_t(capsule\_31a).  
reaction\_gene(brendan,cje,capsule\_31a,cj1421c).  
reaction(brendan,cje,capsule\_31a,'glca+hep+omepn+6ome-galfnac','glca+hep+omepn+6ome-galfnac+omepn',1).  
reaction(brendan,cje,capsule\_31a,'pre-omepn','glca+hep+omepn+6ome-galfnac+omepn',1).  
reaction\_subpathway(brendan,cje,capsule\_31a,cap\_addgalfomepn).  
reaction\_pathway(brendan,cje,capsule\_31a,capsule).

reaction\_t(capsule\_32).  
reaction\_gene(brendan,cje,capsule\_32,cj1421c).  
reaction(brendan,cje,capsule\_32,'glca-galfnac-ribf','glca-galfnac+omepn-ribf',1).  
reaction(brendan,cje,capsule\_32,'pre-omepn','glca-galfnac+omepn-ribf',1).  
reaction\_subpathway(brendan,cje,capsule\_32,cap\_addgalfomepn).  
reaction\_pathway(brendan,cje,capsule\_32,capsule).

reaction\_t(capsule\_33).  
reaction\_gene(brendan,cje,capsule\_33,cj1421c).  
reaction(brendan,cje,capsule\_33,'glca+hep-galfnac-ribf','glca+hep-galfnac+omepn-ribf',1).  
reaction(brendan,cje,capsule\_33,'pre-omepn','glca+hep-galfnac+omepn-ribf',1).  
reaction\_subpathway(brendan,cje,capsule\_33,cap\_addgalfomepn).  
reaction\_pathway(brendan,cje,capsule\_33,capsule).

reaction\_t(capsule\_34a).  
reaction\_gene(brendan,cje,capsule\_34a,cj1421c).  
reaction(brendan,cje,capsule\_34a,'glca+hep+6ome-galfnac-ribf','glca+hep+6ome-galfnac+omepn-ribf',1).  
reaction(brendan,cje,capsule\_34a,'pre-omepn','glca+hep+6ome-galfnac+omepn-ribf',1).  
reaction\_subpathway(brendan,cje,capsule\_34a,cap\_addgalfomepn).  
reaction\_pathway(brendan,cje,capsule\_34a,capsule).

reaction\_t(capsule\_35).  
reaction\_gene(brendan,cje,capsule\_35,cj1421c).  
reaction(brendan,cje,capsule\_35,'glca+hep+omepn-galfnac-ribf','glca+hep+omepn-galfnac+omepn-ribf',1).  
reaction(brendan,cje,capsule\_35,'pre-omepn','glca+hep+omepn-galfnac+omepn-ribf',1).  
reaction\_subpathway(brendan,cje,capsule\_35,cap\_addgalfomepn).  
reaction\_pathway(brendan,cje,capsule\_35,capsule).

reaction\_t(capsule\_36a).

```
reaction_gene(brendan,cje,capsule_36a,cj1421c).
reaction(brendan,cje,capsule_36a,'glca+hep+omepn+6ome-galfnac-ribf','glca+hep+omepn+6ome-galfnac+omepn-ribf',1).
reaction(brendan,cje,capsule_36a,'pre-omepn','glca+hep+omepn+6ome-galfnac+omepn-ribf',1).
reaction_subpathway(brendan,cje,capsule_36a,cap_addgalfomepn).
reaction_pathway(brendan,cje,capsule_36a,capsule).
```

%% Adding ribf

```
reaction_t(capsule_37).
reaction_gene(brendan,cje,capsule_37,unknown).
reaction(brendan,cje,capsule_37,'glca-galfnac','glca-galfnac-ribf',1).
reaction(brendan,cje,capsule_37,'pre-ribf','glca-galfnac-ribf',1).
reaction_subpathway(brendan,cje,capsule_37,cap_addrifb).
reaction_pathway(brendan,cje,capsule_37,capsule).
```

```
reaction_t(capsule_38).
reaction_gene(brendan,cje,capsule_38,unknown).
reaction(brendan,cje,capsule_38,'glca+hep-galfnac','glca+hep-galfnac-ribf',1).
reaction(brendan,cje,capsule_38,'pre-ribf','glca+hep-galfnac-ribf',1).
reaction_subpathway(brendan,cje,capsule_38,cap_addrifb).
reaction_pathway(brendan,cje,capsule_38,capsule).
```

```
reaction_t(capsule_39a).
reaction_gene(brendan,cje,capsule_39a,unknown).
reaction(brendan,cje,capsule_39a,'glca+hep+6ome-galfnac','glca+hep+6ome-galfnac-ribf',1).
reaction(brendan,cje,capsule_39a,'pre-ribf','glca+hep+6ome-galfnac-ribf',1).
reaction_subpathway(brendan,cje,capsule_39a,cap_addrifb).
reaction_pathway(brendan,cje,capsule_39a,capsule).
```

```
reaction_t(capsule_40).
reaction_gene(brendan,cje,capsule_40,unknown).
reaction(brendan,cje,capsule_40,'glca+hep+omepn-galfnac','glca+hep+omepn-galfnac-ribf',1).
reaction(brendan,cje,capsule_40,'pre-ribf','glca+hep+omepn-galfnac-ribf',1).
reaction_subpathway(brendan,cje,capsule_40,cap_addrifb).
reaction_pathway(brendan,cje,capsule_40,capsule).
```

```
reaction_t(capsule_41a).
reaction_gene(brendan,cje,capsule_41a,unknown).
reaction(brendan,cje,capsule_41a,'glca+hep+omepn+6ome-galfnac','glca+hep+omepn+6ome-galfnac-ribf',1).
reaction(brendan,cje,capsule_41a,'pre-ribf','glca+hep+omepn+6ome-galfnac-ribf',1).
reaction_subpathway(brendan,cje,capsule_41a,cap_addrifb).
reaction_pathway(brendan,cje,capsule_41a,capsule).
```

```
reaction_t(capsule_42).
reaction_gene(brendan,cje,capsule_42,unknown).
reaction(brendan,cje,capsule_42,'glca-galfnac+omepn','glca-galfnac+omepn-ribf',1).
reaction(brendan,cje,capsule_42,'pre-ribf','glca-galfnac+omepn-ribf',1).
reaction_subpathway(brendan,cje,capsule_42,cap_addrifb).
reaction_pathway(brendan,cje,capsule_42,capsule).
```

```
reaction_t(capsule_43).
reaction_gene(brendan,cje,capsule_43,unknown).
reaction(brendan,cje,capsule_43,'glca+hep-galfnac+omepn','glca+hep-galfnac+omepn-ribf',1).
```

```
reaction(brendan,cje,capsule_43,'pre-ribf','glca+hep-galfnac+omepn-ribf',1).
reaction_subpathway(brendan,cje,capsule_43,cap_addribf).
reaction_pathway(brendan,cje,capsule_43,capsule).
```

```
reaction_t(capsule_44a).
reaction_gene(brendan,cje,capsule_44a,unknown).
reaction(brendan,cje,capsule_44a,'glca+hep+6ome-galfnac+omepn','glca+hep+6ome-galfnac+omepn-ribf',1).
reaction(brendan,cje,capsule_44a,'pre-ribf','glca+hep+6ome-galfnac+omepn-ribf',1).
reaction_subpathway(brendan,cje,capsule_44a,cap_addribf).
reaction_pathway(brendan,cje,capsule_44a,capsule).
```

```
reaction_t(capsule_45).
reaction_gene(brendan,cje,capsule_45,unknown).
reaction(brendan,cje,capsule_45,'glca+hep+omepn-galfnac+omepn','glca+hep+omepn-galfnac+omepn-ribf',1).
reaction(brendan,cje,capsule_45,'pre-ribf','glca+hep+omepn-galfnac+omepn-ribf',1).
reaction_subpathway(brendan,cje,capsule_45,cap_addribf).
reaction_pathway(brendan,cje,capsule_45,capsule).
```

```
reaction_t(capsule_46a).
reaction_gene(brendan,cje,capsule_46a,unknown).
reaction(brendan,cje,capsule_46a,'glca+hep+omepn+6ome-galfnac+omepn','glca+hep+omepn+6ome-galfnac+omepn-ribf',1).
reaction(brendan,cje,capsule_46a,'pre-ribf','glca+hep+omepn+6ome-galfnac+omepn-ribf',1).
reaction_subpathway(brendan,cje,capsule_46a,cap_addribf).
reaction_pathway(brendan,cje,capsule_46a,capsule).
```

%% adding ngro

```
reaction_t(capsule_addngro1).
reaction_gene(brendan,cje,capsule_addngro1,unknown).
reaction_subpathway(brendan,cje,capsule_addngro1,cap_addngro).
reaction_pathway(brendan,cje,capsule_addngro1,capsule).
reaction(brendan,cje,capsule_addngro1,'glca+hep','glca6ngro+hep',1).
reaction(brendan,cje,capsule_addngro1,'pre-ngro','glca6ngro+hep',1).
```

```
reaction_t(capsule_addngro2).
reaction_gene(brendan,cje,capsule_addngro2,unknown).
reaction_subpathway(brendan,cje,capsule_addngro2,cap_addngro).
reaction_pathway(brendan,cje,capsule_addngro2,capsule).
reaction(brendan,cje,capsule_addngro2,'glca+hep+omepn','glca6ngro+hep+omepn',1).
reaction(brendan,cje,capsule_addngro2,'pre-ngro','glca6ngro+hep+omepn',1).
```

```
reaction_t(capsule_addngro4).
reaction_gene(brendan,cje,capsule_addngro4,unknown).
reaction_subpathway(brendan,cje,capsule_addngro4,cap_addngro).
reaction_pathway(brendan,cje,capsule_addngro4,capsule).
reaction(brendan,cje,capsule_addngro4,'glca+hep+6ome','glca6ngro+hep+6ome',1).
reaction(brendan,cje,capsule_addngro4,'pre-ngro','glca6ngro+hep+6ome',1).
```

```
reaction_t(capsule_addngro6).
reaction_gene(brendan,cje,capsule_addngro6,unknown).
reaction_subpathway(brendan,cje,capsule_addngro6,cap_addngro).
reaction_pathway(brendan,cje,capsule_addngro6,capsule).
```

reaction(brendan,cje,capsule\_addngro6,'glca+hep+omepn+6ome','glca6ngro+hep+omepn+6ome',1).  
reaction(brendan,cje,capsule\_addngro6,'pre-ngro','glca6ngro+hep+omepn+6ome',1).

%% GalfNAc group + phase variable group

reaction\_t(capsule\_addngro9).  
reaction\_gene(brendan,cje,capsule\_addngro9,unknown).  
reaction\_subpathway(brendan,cje,capsule\_addngro9,cap\_addngro).  
reaction\_pathway(brendan,cje,capsule\_addngro9,capsule).  
reaction(brendan,cje,capsule\_addngro9,'glca-galfnac','glca6ngro-galfnac',1).  
reaction(brendan,cje,capsule\_addngro9,'pre-ngro','glca6ngro-galfnac',1).

reaction\_t(capsule\_addngro10).  
reaction\_gene(brendan,cje,capsule\_addngro10,unknown).  
reaction\_subpathway(brendan,cje,capsule\_addngro10,cap\_addngro).  
reaction\_pathway(brendan,cje,capsule\_addngro10,capsule).  
reaction(brendan,cje,capsule\_addngro10,'glca+hep-galfnac','glca6ngro+hep-galfnac',1).  
reaction(brendan,cje,capsule\_addngro10,'pre-ngro','glca6ngro+hep-galfnac',1).

reaction\_t(capsule\_addngro11).  
reaction\_gene(brendan,cje,capsule\_addngro11,unknown).  
reaction\_subpathway(brendan,cje,capsule\_addngro11,cap\_addngro).  
reaction\_pathway(brendan,cje,capsule\_addngro11,capsule).  
reaction(brendan,cje,capsule\_addngro11,'glca+hep+omepn-galfnac','glca6ngro+hep+omepn-galfnac',1).  
reaction(brendan,cje,capsule\_addngro11,'pre-ngro','glca6ngro+hep+omepn-galfnac',1).

reaction\_t(capsule\_addngro13).  
reaction\_gene(brendan,cje,capsule\_addngro13,unknown).  
reaction\_subpathway(brendan,cje,capsule\_addngro13,cap\_addngro).  
reaction\_pathway(brendan,cje,capsule\_addngro13,capsule).  
reaction(brendan,cje,capsule\_addngro13,'glca+hep+6ome-galfnac','glca6ngro+hep+6ome-galfnac',1).  
reaction(brendan,cje,capsule\_addngro13,'pre-ngro','glca6ngro+hep+6ome-galfnac',1).

reaction\_t(capsule\_addngro15).  
reaction\_gene(brendan,cje,capsule\_addngro15,unknown).  
reaction\_subpathway(brendan,cje,capsule\_addngro15,cap\_addngro).  
reaction\_pathway(brendan,cje,capsule\_addngro15,capsule).  
reaction(brendan,cje,capsule\_addngro15,'glca+hep+omepn+6ome-galfnac','glca6ngro+hep+omepn+6ome-galfnac',1).  
reaction(brendan,cje,capsule\_addngro15,'pre-ngro','glca6ngro+hep+omepn+6ome-galfnac',1).

reaction\_t(capsule\_addngro18).  
reaction\_gene(brendan,cje,capsule\_addngro18,unknown).  
reaction\_subpathway(brendan,cje,capsule\_addngro18,cap\_addngro).  
reaction\_pathway(brendan,cje,capsule\_addngro18,capsule).  
reaction(brendan,cje,capsule\_addngro18,'glca-galfnac+omepn','glca6ngro-galfnac+omepn',1).  
reaction(brendan,cje,capsule\_addngro18,'pre-ngro','glca6ngro-galfnac+omepn',1).

reaction\_t(capsule\_addngro19).  
reaction\_gene(brendan,cje,capsule\_addngro19,unknown).  
reaction\_subpathway(brendan,cje,capsule\_addngro19,cap\_addngro).  
reaction\_pathway(brendan,cje,capsule\_addngro19,capsule).  
reaction(brendan,cje,capsule\_addngro19,'glca+hep-galfnac+omepn','glca6ngro+hep-galfnac+omepn',1).  
reaction(brendan,cje,capsule\_addngro19,'pre-ngro','glca6ngro+hep-galfnac+omepn',1).

reaction\_t(capsule\_addngro20).  
reaction\_gene(brendan,cje,capsule\_addngro20,unknown).  
reaction\_subpathway(brendan,cje,capsule\_addngro20,cap\_addngro).  
reaction\_pathway(brendan,cje,capsule\_addngro20,capsule).  
reaction(brendan,cje,capsule\_addngro20,'glca+hep+omepn-galfnac+omepn','glca6ngro+hep+omepn-galfnac+omepn',1).  
reaction(brendan,cje,capsule\_addngro20,'pre-ngro','glca6ngro+hep+omepn-galfnac+omepn',1).

reaction\_t(capsule\_addngro22).  
reaction\_gene(brendan,cje,capsule\_addngro22,unknown).  
reaction\_subpathway(brendan,cje,capsule\_addngro22,cap\_addngro).  
reaction\_pathway(brendan,cje,capsule\_addngro22,capsule).  
reaction(brendan,cje,capsule\_addngro22,'glca+hep+6ome-galfnac+omepn','glca6ngro+hep+6ome-galfnac+omepn',1).  
reaction(brendan,cje,capsule\_addngro22,'pre-ngro','glca6ngro+hep+6ome-galfnac+omepn',1).

reaction\_t(capsule\_addngro24).  
reaction\_gene(brendan,cje,capsule\_addngro24,unknown).  
reaction\_subpathway(brendan,cje,capsule\_addngro24,cap\_addngro).  
reaction\_pathway(brendan,cje,capsule\_addngro24,capsule).  
reaction(brendan,cje,capsule\_addngro24,'glca+hep+omepn+6ome-galfnac+omepn','glca6ngro+hep+omepn+6ome-galfnac+omepn',1).  
reaction(brendan,cje,capsule\_addngro24,'pre-ngro','glca6ngro+hep+omepn+6ome-galfnac+omepn',1).

%% Ribf group

reaction\_t(capsule\_addngro27).  
reaction\_gene(brendan,cje,capsule\_addngro27,unknown).  
reaction\_subpathway(brendan,cje,capsule\_addngro27,cap\_addngro).  
reaction\_pathway(brendan,cje,capsule\_addngro27,capsule).  
reaction(brendan,cje,capsule\_addngro27,'glca-galfnac-ribf','glca6ngro-galfnac-ribf',1).  
reaction(brendan,cje,capsule\_addngro27,'pre-ngro','glca6ngro-galfnac-ribf',1).

reaction\_t(capsule\_addngro28).  
reaction\_gene(brendan,cje,capsule\_addngro28,unknown).  
reaction\_subpathway(brendan,cje,capsule\_addngro28,cap\_addngro).  
reaction\_pathway(brendan,cje,capsule\_addngro28,capsule).  
reaction(brendan,cje,capsule\_addngro28,'glca+hep-galfnac-ribf','glca6ngro+hep-galfnac-ribf',1).  
reaction(brendan,cje,capsule\_addngro28,'pre-ngro','glca6ngro+hep-galfnac-ribf',1).

reaction\_t(capsule\_addngro29).  
reaction\_gene(brendan,cje,capsule\_addngro29,unknown).  
reaction\_subpathway(brendan,cje,capsule\_addngro29,cap\_addngro).  
reaction\_pathway(brendan,cje,capsule\_addngro29,capsule).  
reaction(brendan,cje,capsule\_addngro29,'glca+hep+omepn-galfnac-ribf','glca6ngro+hep+omepn-galfnac-ribf',1).  
reaction(brendan,cje,capsule\_addngro29,'pre-ngro','glca6ngro+hep+omepn-galfnac-ribf',1).

reaction\_t(capsule\_addngro31).  
reaction\_gene(brendan,cje,capsule\_addngro31,unknown).  
reaction\_subpathway(brendan,cje,capsule\_addngro31,cap\_addngro).  
reaction\_pathway(brendan,cje,capsule\_addngro31,capsule).  
reaction(brendan,cje,capsule\_addngro31,'glca+hep+6ome-galfnac-ribf','glca6ngro+hep+6ome-galfnac-ribf',1).  
reaction(brendan,cje,capsule\_addngro31,'pre-ngro','glca6ngro+hep+6ome-galfnac-ribf',1).

```
reaction_t(capsule_addngro33).
reaction_gene(brendan,cje,capsule_addngro33,unknown).
reaction_subpathway(brendan,cje,capsule_addngro33,cap_addngro).
reaction_pathway(brendan,cje,capsule_addngro33,capsule).
reaction(brendan,cje,capsule_addngro33,'glca+hep+omepn+6ome-galfnac-ribf','glca6ngro+hep+omepn+6ome-galfnac-ribf',1).
reaction(brendan,cje,capsule_addngro33,'pre-ngro','glca6ngro+hep+omepn+6ome-galfnac-ribf',1).
```

```
reaction_t(capsule_addngro36).
reaction_gene(brendan,cje,capsule_addngro36,unknown).
reaction_subpathway(brendan,cje,capsule_addngro36,cap_addngro).
reaction_pathway(brendan,cje,capsule_addngro36,capsule).
reaction(brendan,cje,capsule_addngro36,'glca-galfnac+omepn-ribf','glca6ngro-galfnac+omepn-ribf',1).
reaction(brendan,cje,capsule_addngro36,'pre-ngro','glca6ngro-galfnac+omepn-ribf',1).
```

```
reaction_t(capsule_addngro37).
reaction_gene(brendan,cje,capsule_addngro37,unknown).
reaction_subpathway(brendan,cje,capsule_addngro37,cap_addngro).
reaction_pathway(brendan,cje,capsule_addngro37,capsule).
reaction(brendan,cje,capsule_addngro37,'glca+hep-galfnac+omepn-ribf','glca6ngro+hep-galfnac+omepn-ribf',1).
reaction(brendan,cje,capsule_addngro37,'pre-ngro','glca6ngro+hep-galfnac+omepn-ribf',1).
```

```
reaction_t(capsule_addngro38).
reaction_gene(brendan,cje,capsule_addngro38,unknown).
reaction_subpathway(brendan,cje,capsule_addngro38,cap_addngro).
reaction_pathway(brendan,cje,capsule_addngro38,capsule).
reaction(brendan,cje,capsule_addngro38,'glca+hep+omepn-galfnac+omepn-ribf','glca6ngro+hep+omepn-galfnac+omepn-ribf',1).
reaction(brendan,cje,capsule_addngro38,'pre-ngro','glca6ngro+hep+omepn-galfnac+omepn-ribf',1).
```

```
reaction_t(capsule_addngro40).
reaction_gene(brendan,cje,capsule_addngro40,unknown).
reaction_subpathway(brendan,cje,capsule_addngro40,cap_addngro).
reaction_pathway(brendan,cje,capsule_addngro40,capsule).
reaction(brendan,cje,capsule_addngro40,'glca+hep+6ome-galfnac+omepn-ribf','glca6ngro+hep+6ome-galfnac+omepn-ribf',1).
reaction(brendan,cje,capsule_addngro40,'pre-ngro','glca6ngro+hep+6ome-galfnac+omepn-ribf',1).
```

```
reaction_t(capsule_addngro42).
reaction_gene(brendan,cje,capsule_addngro42,unknown).
reaction_subpathway(brendan,cje,capsule_addngro42,cap_addngro).
reaction_pathway(brendan,cje,capsule_addngro42,capsule).
reaction(brendan,cje,capsule_addngro42,'glca+hep+omepn+6ome-galfnac+omepn-ribf','glca6ngro+hep+omepn+6ome-galfnac+omepn-ribf',1).
reaction(brendan,cje,capsule_addngro42,'pre-ngro','glca6ngro+hep+omepn+6ome-galfnac+omepn-ribf',1).
```

```
%% adding etn
% .....
```

%% Lipooligosaccharide synthesis pathway

%%...

%% Capsule synthesis pathway

glycan\_pathway(brendan,cje,capsule).  
glycan\_root(brendan,cje,capsule,'Chain').  
glycan\_part(brendan,cje,capsule,'Chain','Chain').  
glycan\_part(brendan,cje,capsule,'GlcA','GlcA').  
glycan\_part(brendan,cje,capsule,'NGro','NGro').  
glycan\_part(brendan,cje,capsule,'EtN','EtN').  
glycan\_part(brendan,cje,capsule,'Hep','Hep').  
glycan\_part(brendan,cje,capsule,'Hep OMePN','OMePN').  
glycan\_part(brendan,cje,capsule,'Hep 3-OMe','3-OMe').  
glycan\_part(brendan,cje,capsule,'Hep 6-OMe','6-OMe').  
glycan\_part(brendan,cje,capsule,'GalfNAc','GalfNAc').  
glycan\_part(brendan,cje,capsule,'GalfNAc OMePN','OMePN').  
glycan\_part(brendan,cje,capsule,'Ribf','Ribf').

part\_precursor(brendan,cje,capsule,'GlcA','pre-glca').  
part\_precursor(brendan,cje,capsule,'NGro','pre-ngro').  
part\_precursor(brendan,cje,capsule,'EtN','pre-etn').  
part\_precursor(brendan,cje,capsule,'Hep','gdp-d-al-gluco-hep').  
part\_precursor(brendan,cje,capsule,'Hep OMePN','pre-omepn').  
part\_precursor(brendan,cje,capsule,'Hep 3-OMe','pre-ome').  
part\_precursor(brendan,cje,capsule,'Hep 6-OMe','pre-ome').  
part\_precursor(brendan,cje,capsule,'GalfNAc','pre-galfnac').  
part\_precursor(brendan,cje,capsule,'GalfNAc OMePN','pre-omepn').  
part\_precursor(brendan,cje,capsule,'Ribf','pre-ribf').

glycan\_join(brendan,cje,capsule,'Chain','GlcA',cj1441c).  
guess\_glycan\_join(brendan,cje,capsule,'Chain','GlcA',cj1441c).  
glycan\_join(brendan,cje,capsule,'GlcA','NGro',unknown).  
glycan\_join(brendan,cje,capsule,'GlcA','EtN',unknown).  
glycan\_join(brendan,cje,capsule,'GlcA','Hep',cj1431c).  
glycan\_join(brendan,cje,capsule,'Hep','Hep OMePN',cj1422c).  
glycan\_join(brendan,cje,capsule,'Hep','Hep 3-OMe',unknown).  
glycan\_join(brendan,cje,capsule,'Hep','Hep 6-OMe',cj1426c).  
glycan\_join(brendan,cje,capsule,'GlcA','GalfNAc',cj1439c).  
guess\_glycan\_join(brendan,cje,capsule,'GlcA','GalfNAc',cj1439c).  
glycan\_join(brendan,cje,capsule,'GalfNAc','GalfNAc OMePN',cj1421c).  
glycan\_join(brendan,cje,capsule,'GalfNAc','Ribf',unknown).

%% Contains part

%% Chain

contains\_part(brendan,cje,capsule,'capsule\_chain','Chain').  
contains\_part(brendan,cje,capsule,'glca','Chain').  
contains\_part(brendan,cje,capsule,'glca6ngro','Chain').  
contains\_part(brendan,cje,capsule,'glca6etn','Chain').  
contains\_part(brendan,cje,capsule,'glca6ngro+hep','Chain').  
contains\_part(brendan,cje,capsule,'glca6ngro+hep+omepn','Chain').



































contains\_part(brendan,cje,capsule,'glca6etn+hep+omepn+3ome-galfnac-ribf','Ribf').  
contains\_part(brendan,cje,capsule,'glca6etn+hep+omepn+6ome-galfnac-ribf','Ribf').  
contains\_part(brendan,cje,capsule,'glca6etn+hep+3ome+6ome-galfnac-ribf','Ribf').  
contains\_part(brendan,cje,capsule,'glca6etn+hep+omepn+3ome+6ome-galfnac-ribf','Ribf').  
contains\_part(brendan,cje,capsule,'glca6etn-galfnac+omepn-ribf','Ribf').  
contains\_part(brendan,cje,capsule,'glca6etn+hep-galfnac+omepn-ribf','Ribf').  
contains\_part(brendan,cje,capsule,'glca6etn+hep+omepn-galfnac+omepn-ribf','Ribf').  
contains\_part(brendan,cje,capsule,'glca6etn+hep+3ome-galfnac+omepn-ribf','Ribf').  
contains\_part(brendan,cje,capsule,'glca6etn+hep+6ome-galfnac+omepn-ribf','Ribf').  
contains\_part(brendan,cje,capsule,'glca6etn+hep+omepn+3ome-galfnac+omepn-ribf','Ribf').  
contains\_part(brendan,cje,capsule,'glca6etn+hep+omepn+6ome-galfnac+omepn-ribf','Ribf').  
contains\_part(brendan,cje,capsule,'glca6etn+hep+3ome+6ome-galfnac+omepn-ribf','Ribf').  
contains\_part(brendan,cje,capsule,'glca6etn+hep+omepn+3ome+6ome-galfnac+omepn-ribf','Ribf').  
contains\_part(brendan,cje,capsule,'glca-galfnac-ribf','Ribf').  
contains\_part(brendan,cje,capsule,'glca+hep-galfnac-ribf','Ribf').  
contains\_part(brendan,cje,capsule,'glca+hep+omepn-galfnac-ribf','Ribf').  
contains\_part(brendan,cje,capsule,'glca+hep+3ome-galfnac-ribf','Ribf').  
contains\_part(brendan,cje,capsule,'glca+hep+6ome-galfnac-ribf','Ribf').  
contains\_part(brendan,cje,capsule,'glca+hep+omepn+3ome-galfnac-ribf','Ribf').  
contains\_part(brendan,cje,capsule,'glca+hep+omepn+6ome-galfnac-ribf','Ribf').  
contains\_part(brendan,cje,capsule,'glca+hep+3ome+6ome-galfnac-ribf','Ribf').  
contains\_part(brendan,cje,capsule,'glca+hep+omepn+3ome+6ome-galfnac-ribf','Ribf').  
contains\_part(brendan,cje,capsule,'glca-galfnac+omepn-ribf','Ribf').  
contains\_part(brendan,cje,capsule,'glca+hep-galfnac+omepn-ribf','Ribf').  
contains\_part(brendan,cje,capsule,'glca+hep+omepn-galfnac+omepn-ribf','Ribf').  
contains\_part(brendan,cje,capsule,'glca+hep+3ome-galfnac+omepn-ribf','Ribf').  
contains\_part(brendan,cje,capsule,'glca+hep+6ome-galfnac+omepn-ribf','Ribf').  
contains\_part(brendan,cje,capsule,'glca+hep+omepn+3ome-galfnac+omepn-ribf','Ribf').  
contains\_part(brendan,cje,capsule,'glca+hep+omepn+6ome-galfnac+omepn-ribf','Ribf').  
contains\_part(brendan,cje,capsule,'glca+hep+3ome+6ome-galfnac+omepn-ribf','Ribf').  
contains\_part(brendan,cje,capsule,'glca+hep+omepn+3ome+6ome-galfnac+omepn-ribf','Ribf').

%% Adds part

%% GlcA

adds\_part(brendan,cje,capsule,capsule\_0,'GlcA').

%% NGro

adds\_part(brendan,cje,capsule,capsule\_ngro0,'NGro').  
adds\_part(brendan,cje,capsule,capsule\_addngro1,'NGro').  
adds\_part(brendan,cje,capsule,capsule\_addngro2,'NGro').  
adds\_part(brendan,cje,capsule,capsule\_addngro3,'NGro').  
adds\_part(brendan,cje,capsule,capsule\_addngro4,'NGro').  
adds\_part(brendan,cje,capsule,capsule\_addngro5,'NGro').  
adds\_part(brendan,cje,capsule,capsule\_addngro6,'NGro').  
adds\_part(brendan,cje,capsule,capsule\_addngro7,'NGro').  
adds\_part(brendan,cje,capsule,capsule\_addngro8,'NGro').  
adds\_part(brendan,cje,capsule,capsule\_addngro9,'NGro').  
adds\_part(brendan,cje,capsule,capsule\_addngro10,'NGro').  
adds\_part(brendan,cje,capsule,capsule\_addngro11,'NGro').  
adds\_part(brendan,cje,capsule,capsule\_addngro12,'NGro').





adds\_part(brendan,cje,capsule,capsule\_addetn19,'EtN').  
adds\_part(brendan,cje,capsule,capsule\_addetn20,'EtN').  
adds\_part(brendan,cje,capsule,capsule\_addetn21,'EtN').  
adds\_part(brendan,cje,capsule,capsule\_addetn22,'EtN').  
adds\_part(brendan,cje,capsule,capsule\_addetn23,'EtN').  
adds\_part(brendan,cje,capsule,capsule\_addetn24,'EtN').  
adds\_part(brendan,cje,capsule,capsule\_addetn25,'EtN').  
adds\_part(brendan,cje,capsule,capsule\_addetn26,'EtN').  
adds\_part(brendan,cje,capsule,capsule\_addetn27,'EtN').  
adds\_part(brendan,cje,capsule,capsule\_addetn28,'EtN').  
adds\_part(brendan,cje,capsule,capsule\_addetn29,'EtN').  
adds\_part(brendan,cje,capsule,capsule\_addetn30,'EtN').  
adds\_part(brendan,cje,capsule,capsule\_addetn31,'EtN').  
adds\_part(brendan,cje,capsule,capsule\_addetn32,'EtN').  
adds\_part(brendan,cje,capsule,capsule\_addetn33,'EtN').  
adds\_part(brendan,cje,capsule,capsule\_addetn34,'EtN').  
adds\_part(brendan,cje,capsule,capsule\_addetn35,'EtN').  
adds\_part(brendan,cje,capsule,capsule\_addetn36,'EtN').  
adds\_part(brendan,cje,capsule,capsule\_addetn37,'EtN').  
adds\_part(brendan,cje,capsule,capsule\_addetn38,'EtN').  
adds\_part(brendan,cje,capsule,capsule\_addetn39,'EtN').  
adds\_part(brendan,cje,capsule,capsule\_addetn40,'EtN').  
adds\_part(brendan,cje,capsule,capsule\_addetn41,'EtN').  
adds\_part(brendan,cje,capsule,capsule\_addetn42,'EtN').  
adds\_part(brendan,cje,capsule,capsule\_addetn43,'EtN').  
adds\_part(brendan,cje,capsule,capsule\_addetn44,'EtN').

%% Hep

adds\_part(brendan,cje,capsule,capsule\_ngo1,'Hep').  
adds\_part(brendan,cje,capsule,capsule\_ngo1a,'Hep').  
adds\_part(brendan,cje,capsule,capsule\_ngo1b,'Hep').  
adds\_part(brendan,cje,capsule,capsule\_ngo1c,'Hep').  
adds\_part(brendan,cje,capsule,capsule\_etn1,'Hep').  
adds\_part(brendan,cje,capsule,capsule\_etn1a,'Hep').  
adds\_part(brendan,cje,capsule,capsule\_etn1b,'Hep').  
adds\_part(brendan,cje,capsule,capsule\_etn1c,'Hep').  
adds\_part(brendan,cje,capsule,capsule\_1,'Hep').  
adds\_part(brendan,cje,capsule,capsule\_1a,'Hep').  
adds\_part(brendan,cje,capsule,capsule\_1b,'Hep').  
adds\_part(brendan,cje,capsule,capsule\_1c,'Hep').

%% Hep OMePN

adds\_part(brendan,cje,capsule,capsule\_ngo4,'Hep OMePN').  
adds\_part(brendan,cje,capsule,capsule\_ngo5,'Hep OMePN').  
adds\_part(brendan,cje,capsule,capsule\_ngo5a,'Hep OMePN').  
adds\_part(brendan,cje,capsule,capsule\_ngo5b,'Hep OMePN').  
adds\_part(brendan,cje,capsule,capsule\_ngo8,'Hep OMePN').  
adds\_part(brendan,cje,capsule,capsule\_ngo9,'Hep OMePN').  
adds\_part(brendan,cje,capsule,capsule\_ngo9a,'Hep OMePN').  
adds\_part(brendan,cje,capsule,capsule\_ngo9b,'Hep OMePN').  
adds\_part(brendan,cje,capsule,capsule\_ngo12,'Hep OMePN').  
adds\_part(brendan,cje,capsule,capsule\_ngo13,'Hep OMePN').







adds\_part(brendan,cje,capsule,capsule\_9e,'Hep 6-OMe').  
adds\_part(brendan,cje,capsule,capsule\_9f,'Hep 6-OMe').  
adds\_part(brendan,cje,capsule,capsule\_13c,'Hep 6-OMe').  
adds\_part(brendan,cje,capsule,capsule\_13d,'Hep 6-OMe').  
adds\_part(brendan,cje,capsule,capsule\_13e,'Hep 6-OMe').  
adds\_part(brendan,cje,capsule,capsule\_13f,'Hep 6-OMe').  
adds\_part(brendan,cje,capsule,capsule\_17c,'Hep 6-OMe').  
adds\_part(brendan,cje,capsule,capsule\_17d,'Hep 6-OMe').  
adds\_part(brendan,cje,capsule,capsule\_17e,'Hep 6-OMe').  
adds\_part(brendan,cje,capsule,capsule\_17f,'Hep 6-OMe').  
adds\_part(brendan,cje,capsule,capsule\_21c,'Hep 6-OMe').  
adds\_part(brendan,cje,capsule,capsule\_21d,'Hep 6-OMe').  
adds\_part(brendan,cje,capsule,capsule\_21e,'Hep 6-OMe').  
adds\_part(brendan,cje,capsule,capsule\_21f,'Hep 6-OMe').

#### %% GalfNAc

adds\_part(brendan,cje,capsule,capsule\_ngro22,'GalfNAc').  
adds\_part(brendan,cje,capsule,capsule\_ngro23,'GalfNAc').  
adds\_part(brendan,cje,capsule,capsule\_ngro24,'GalfNAc').  
adds\_part(brendan,cje,capsule,capsule\_ngro24a,'GalfNAc').  
adds\_part(brendan,cje,capsule,capsule\_ngro25,'GalfNAc').  
adds\_part(brendan,cje,capsule,capsule\_ngro26,'GalfNAc').  
adds\_part(brendan,cje,capsule,capsule\_ngro26a,'GalfNAc').  
adds\_part(brendan,cje,capsule,capsule\_ngro26b,'GalfNAc').  
adds\_part(brendan,cje,capsule,capsule\_ngro26c,'GalfNAc').  
adds\_part(brendan,cje,capsule,capsule\_etn22,'GalfNAc').  
adds\_part(brendan,cje,capsule,capsule\_etn23,'GalfNAc').  
adds\_part(brendan,cje,capsule,capsule\_etn24,'GalfNAc').  
adds\_part(brendan,cje,capsule,capsule\_etn24a,'GalfNAc').  
adds\_part(brendan,cje,capsule,capsule\_etn25,'GalfNAc').  
adds\_part(brendan,cje,capsule,capsule\_etn26,'GalfNAc').  
adds\_part(brendan,cje,capsule,capsule\_etn26a,'GalfNAc').  
adds\_part(brendan,cje,capsule,capsule\_etn26b,'GalfNAc').  
adds\_part(brendan,cje,capsule,capsule\_etn26c,'GalfNAc').  
adds\_part(brendan,cje,capsule,capsule\_22,'GalfNAc').  
adds\_part(brendan,cje,capsule,capsule\_23,'GalfNAc').  
adds\_part(brendan,cje,capsule,capsule\_24,'GalfNAc').  
adds\_part(brendan,cje,capsule,capsule\_24a,'GalfNAc').  
adds\_part(brendan,cje,capsule,capsule\_25,'GalfNAc').  
adds\_part(brendan,cje,capsule,capsule\_26,'GalfNAc').  
adds\_part(brendan,cje,capsule,capsule\_26a,'GalfNAc').  
adds\_part(brendan,cje,capsule,capsule\_26b,'GalfNAc').  
adds\_part(brendan,cje,capsule,capsule\_26c,'GalfNAc').

#### %% GalfNAc OMePN

adds\_part(brendan,cje,capsule,capsule\_ngro27,'GalfNAc OMePN').  
adds\_part(brendan,cje,capsule,capsule\_ngro28,'GalfNAc OMePN').  
adds\_part(brendan,cje,capsule,capsule\_ngro29,'GalfNAc OMePN').  
adds\_part(brendan,cje,capsule,capsule\_ngro29a,'GalfNAc OMePN').  
adds\_part(brendan,cje,capsule,capsule\_ngro30,'GalfNAc OMePN').  
adds\_part(brendan,cje,capsule,capsule\_ngro31,'GalfNAc OMePN').  
adds\_part(brendan,cje,capsule,capsule\_ngro31a,'GalfNAc OMePN').







neighbour\_reaction(capsule\_0,capsule\_pre\_pre\_glca).  
neighbour\_reaction(capsule\_pre\_pre\_glca,capsule\_0).  
neighbour\_reaction(capsule\_pre\_pre\_glca,capsule\_pre\_pre\_glca).  
neighbour\_reaction(capsule\_pre\_pre\_glca,capsule\_pre\_pre\_glca).

neighbour\_reaction(capsule\_0,capsule\_ngro1c).  
neighbour\_reaction(capsule\_ngro1c,capsule\_0).

neighbour\_reaction(capsule\_pre\_pre\_galfnac,capsule\_22).  
neighbour\_reaction(capsule\_22,capsule\_pre\_pre\_galfnac).  
neighbour\_reaction(capsule\_pre\_pre\_galfnac,capsule\_pre\_pre\_galfnac).  
neighbour\_reaction(capsule\_pre\_pre\_galfnac,capsule\_pre\_pre\_galfnac).

neighbour\_reaction(capsule\_ngro36a,capsule\_22).  
neighbour\_reaction(capsule\_22,capsule\_ngro36a).

neighbour\_reaction(capsule\_pre\_pre\_ribf,capsule\_37).  
neighbour\_reaction(capsule\_37,capsule\_pre\_pre\_ribf).

neighbour\_reaction(capsule\_22,capsule\_37).  
neighbour\_reaction(capsule\_37,capsule\_22).

neighbour\_reaction(capsule\_ngro36a,capsule\_37).  
neighbour\_reaction(capsule\_37,capsule\_ngro36a).

neighbour\_reaction(capsule\_pre\_glca,capsule\_pre\_hep).  
neighbour\_reaction(capsule\_pre\_hep,capsule\_pre\_glca).  
neighbour\_reaction(capsule\_pre\_glca,capsule\_1).  
neighbour\_reaction(capsule\_1,capsule\_pre\_glca).  
neighbour\_reaction(capsule\_0,capsule\_1).  
neighbour\_reaction(capsule\_1,capsule\_0).

neighbour\_reaction(capsule\_pre\_glca,capsule\_ngro21c).  
neighbour\_reaction(capsule\_pre\_glca,capsule\_ngro21a).  
neighbour\_reaction(capsule\_ngro21c,capsule\_pre\_glca).  
neighbour\_reaction(capsule\_ngro21a,capsule\_pre\_glca).

neighbour\_reaction(capsule\_pre\_pre\_glca,capsule\_pre\_hep).  
neighbour\_reaction(capsule\_pre\_pre\_glca,capsule\_ngro21c).  
neighbour\_reaction(capsule\_pre\_pre\_glca,capsule\_ngro21a).  
neighbour\_reaction(capsule\_pre\_hep,capsule\_pre\_pre\_glca).  
neighbour\_reaction(capsule\_ngro21c,capsule\_pre\_pre\_glca).  
neighbour\_reaction(capsule\_ngro21a,capsule\_pre\_pre\_glca).

neighbour\_reaction(capsule\_pre\_hep,capsule\_ngro21c).  
neighbour\_reaction(capsule\_pre\_hep,capsule\_ngro21a).  
neighbour\_reaction(capsule\_ngro21c,capsule\_pre\_hep).  
neighbour\_reaction(capsule\_ngro21a,capsule\_pre\_hep).

neighbour\_reaction(capsule\_ngro21c,capsule\_ngro21a).  
neighbour\_reaction(capsule\_ngro21a,capsule\_ngro21c).

neighbour\_reaction(capsule\_pre\_pre\_galfnac,capsule\_ngro36a).  
neighbour\_reaction(capsule\_pre\_pre\_galfnac,capsule\_pre\_pre\_omepn).

neighbour\_reaction(capsule\_ngro36a,capsule\_pre\_pre\_galfnac).  
neighbour\_reaction(capsule\_pre\_pre\_omepn,capsule\_pre\_pre\_galfnac).

neighbour\_reaction(capsule\_ngro21a,capsule\_pre\_pre\_omepn).  
neighbour\_reaction(capsule\_pre\_pre\_omepn,capsule\_ngro21a).  
neighbour\_reaction(capsule\_ngro36a,capsule\_pre\_pre\_omepn).  
neighbour\_reaction(capsule\_pre\_pre\_omepn,capsule\_ngro36a).

neighbour\_reaction(capsule\_pre\_pre\_glca,capsule\_pre\_hep).  
neighbour\_reaction(capsule\_pre\_hep,capsule\_pre\_pre\_glca).

neighbour\_reaction(capsule\_ngro1c,capsule\_ngro1c).  
neighbour\_reaction(capsule\_ngro1c,capsule\_ngro21a).

%%%%%%%%  
%%%%%%%%

% additional reaction information related to pre-cursors  
%

reaction(brendan,cje,capsule\_pre\_pre\_omepn,'pre-pre-omepn','pre-omepn',1).  
chain(capsule\_pre\_pre\_omepn).

reaction(brendan,cje,capsule\_pre\_pre\_ribf,'pre-pre-ribf','pre-ribf',1).  
chain(capsule\_pre\_pre\_ribf).

reaction(brendan,cje,capsule\_pre\_pre\_glca,'pre-pre-glca','pre-glca',1).

reaction(brendan,cje,capsule\_pre\_pre\_galfnac,'pre-pre-galfnac','pre-galfnac',1).

%reaction(brendan,cje,capsule\_pre\_pre\_omepn,'pre-pre-omepn','pre-omepn',1).

reaction(brendan,cje,capsule\_pre\_pre\_hep,'pre-pre-hep','pre-hep',1).  
chain(capsule\_pre\_pre\_hep).

reaction(brendan,cje,capsule\_pre\_hep,'glca6ngro','glca6ngro+hep',1).  
reaction(brendan,cje,capsule\_pre\_hep,'pre-hep','glca6ngro+hep',1).

```
% FILE GLYCAN_STRUCTURE_PL
% The Campy CPS glycan structures. This includes the definition of struct_next
% which states that one glycan structure is related to another by the addition
% of a single chemical group
```

```
struct_next('pre-glca','glca').
struct_next('pre-galfnac','galfnac').
struct_next('pre-ribf','ribf').
```

```
struct_next('glca','glca-galfnac').
```

```
struct_next('glca-galfnac',
            'glca-galfnac-ribf').
```

```
struct_next('galfnac-ribf',
            'glca-galfnac-ribf').
```

```
struct_next('glca-ribf',
            'glca-galfnac-ribf').
```

```
struct_next('glca-galfnac-ribf',
            'glca6ngro-galfnac-ribf').
```

```
struct_next('glca6ngro-galfnac-ribf',
            'glca6ngro-galfnac+omepn-ribf').
```

```
struct_next('glca6ngro-galfnac+omepn-ribf',
            'glca6ngro+hep-galfnac+omepn-ribf').
```

```
struct_next('glca6ngro+hep-galfnac+omepn-ribf',
            'glca6ngro+hep+6ome-galfnac+omepn-ribf').
```

```
struct_next('glca6ngro+hep+6ome-galfnac-ribf',
            'glca6ngro+hep+6ome-galfnac+omepn-ribf').
```

```
struct_next('glca6ngro+hep+6ome-galfnac-ribf',
            'glca6ngro+hep+omepn+6ome-galfnac-ribf').
```

```
struct_next('glca6ngro+hep+omepn+6ome-galfnac-ribf',
            'glca6ngro+hep+omepn+6ome-galfnac+omepn-ribf').
```

```
struct_next('glca6ngro+hep+6ome-galfnac+omepn-ribf',
            'glca6ngro+hep+omepn+6ome-galfnac+omepn-ribf').
```

```
struct_observable('glca6ngro+hep+6ome-galfnac-ribf',
                  'glca6ngro+hep+6ome-galfnac-ribf').
```

```
struct_observable('glca6ngro+hep+6ome-galfnac+omepn-ribf',
                  'glca6ngro+hep+6ome-galfnac+omepn-ribf').
```

```
struct_observable('glca6ngro+hep+omepn+6ome-galfnac-ribf',
```

```
'glca6ngro+hep+omepn+6ome-galfnac-ribf').  
struct_observable('glca6ngro-galfnac+omepn-ribf',  
  'glca6ngro-galfnac+omepn-ribf').  
struct_observable('glca6ngro+hep-galfnac+omepn-ribf',  
  'glca6ngro+hep-galfnac+omepn-ribf').  
struct_observable('glca6ngro-galfnac+omepn-ribf',  
  'glca6ngro-galfnac+omepn-ribf').
```

```
struct_observable('glca-galfnac','acapsular').  
struct_observable('galfnac-ribf','acapsular').  
struct_observable('glca-ribf','acapsular').  
struct_observable('glca','acapsular').  
struct_observable('pre-glca','acapsular').
```

```
struct_observable('pre_pre-glca','pre_pre-glca').  
struct_observable('pre_pre-galfnac','pre_pre-galfnac').  
struct_observable('pre_pre-hep','pre_pre-hep').
```

```
struct_observable('glca-galfnac','glca-galfnac').  
struct_observable('galfnac-ribf','galfnac-ribf').  
struct_observable('glca-ribf','glca-ribf').
```

% FILE MUTANTS\_PL  
% The gene knock-out experiments for Campy CPS. The data is mainly compiled from  
% previously published data (McNally, 2007). The data is represented by instances  
% of the 'knockout\_observable' predicate which states when a specific gene is  
% knocked out this result causes a particular glycan structure to be the largest  
% synthesised

knockout\_observable(cj1416c,'glca6ngro+hep+6ome-galfnac-ribf').  
knockout\_observable(cj1417c,'glca6ngro+hep+6ome-galfnac-ribf').  
knockout\_observable(cj1418c,'glca6ngro+hep+6ome-galfnac-ribf').  
knockout\_observable(cj1421c,'glca6ngro+hep+6ome-galfnac+omepn-ribf').  
knockout\_observable(cj1422c,'glca6ngro+hep+omepn+6ome-galfnac-ribf').  
knockout\_observable(cj1423c,'glca6ngro-galfnac+omepn-ribf').  
knockout\_observable(cj1424c,'glca6ngro-galfnac+omepn-ribf').  
knockout\_observable(cj1425c,'glca6ngro-galfnac+omepn-ribf').  
knockout\_observable(cj1426c,'glca6ngro+hep-galfnac+omepn-ribf').  
knockout\_observable(cj1427c,'glca6ngro-galfnac+omepn-ribf').  
knockout\_observable(cj1428c,'glca6ngro-galfnac+omepn-ribf').  
knockout\_observable(cj1430c,'glca6ngro-galfnac+omepn-ribf').  
knockout\_observable(cj1431c,'glca6ngro-galfnac+omepn-ribf').  
knockout\_observable(cj1432c,'acapsular').  
knockout\_observable(cj1434c,'acapsular').  
knockout\_observable(cj1435c,'acapsular').  
knockout\_observable(cj1437c,'acapsular').  
knockout\_observable(cj1438c,'acapsular').  
knockout\_observable(cj1439c,'acapsular').  
knockout\_observable(cj1440c,'acapsular').  
knockout\_observable(cj1441c,'acapsular').  
knockout\_observable(cj1442c,'acapsular').  
knockout\_observable(cj1448c,'acapsular').

% FILE STRAINS\_PL  
% The cross-strain genomic data for the CPS loci originate from an in-progress study  
% in which 270 *C. jejuni* isolates were analysed by comparative phylogenomics (whole  
% genome comparisons of bacteria using DNA microarrays, combined with Bayesian-based  
% algorithms, to model the phylogeny), using a previously published method (Champion,  
% 2005).The data includes predicates 'absent' and 'occurs' which state that a particular  
% gene is absent or present from a particular strain.

occurs(strainClinicalG1,cj1413c).  
occurs(strainClinicalG3,cj1413c).  
occurs(strainChickenicken11974,cj1413c).  
occurs(strainChickenicken13249,cj1413c).  
occurs(strainChickenicken13411,cj1413c).  
occurs(strainClinical44811,cj1413c).  
occurs(strainClinical48612,cj1413c).  
occurs(strainClinical58473,cj1413c).  
occurs(strainChicken11848,cj1413c).  
occurs(strainChicken12567,cj1413c).  
occurs(strainChicken11919,cj1413c).  
occurs(strainChicken11973,cj1413c).  
occurs(strainChicken13713,cj1413c).  
occurs(strainBeach1791,cj1413c).  
occurs(strainClinical43205,cj1413c).  
occurs(strainClinical33106,cj1413c).  
occurs(strainClinical38556,cj1413c).  
occurs(strainClinical39182,cj1413c).  
occurs(strainClinical44933,cj1413c).  
occurs(strainClinical45631,cj1413c).  
occurs(strainClinical55320,cj1413c).  
occurs(strainClinical55703,cj1413c).  
occurs(strainClinical30280,cj1413c).  
occurs(strainClinical30328,cj1413c).  
occurs(strainClinical41651,cj1413c).  
occurs(strainClinical32799,cj1413c).  
occurs(strainClinical43983,cj1413c).  
occurs(strainClinical40671,cj1413c).  
occurs(strainClinical44958,cj1413c).  
occurs(strainClinical52331,cj1413c).  
occurs(strainClinical56281,cj1413c).  
occurs(strainClinical56282,cj1413c).  
occurs(strainClinical56832,cj1413c).  
occurs(strainOvine12241,cj1413c).  
occurs(strainOvine12481,cj1413c).  
occurs(strainBovinevineine13305,cj1413c).  
occurs(strainChickenicken12912,cj1413c).  
occurs(strainChickenicken11818,cj1413c).  
occurs(strainChicken12196,cj1413c).  
occurs(strainChickenicken12450,cj1413c).  
occurs(strainChickenicken12487,cj1413c).  
occurs(strainChickenicken13082,cj1413c).  
occurs(strainChickenicken13040,cj1413c).  
occurs(strainChickenicken11856,cj1413c).  
occurs(strainClinical36069,cj1413c).

occurs(strainChicken40209,cj1413c).  
occurs(strainBeach1793,cj1413c).  
occurs(strainClinical81116,cj1413c).  
occurs(strainClinical36439,cj1413c).  
occurs(strainClinical56519,cj1413c).  
occurs(strainClinical32787,cj1413c).  
occurs(strainClinical31467,cj1413c).  
occurs(strainClinical44119,cj1413c).  
occurs(strainClinical34007,cj1413c).  
occurs(strainClinical38762,cj1413c).  
occurs(strainClinicalical15168,cj1413c).  
occurs(strainClinical18836,cj1413c).  
occurs(strainClinicalM1,cj1413c).  
occurs(strainClinical36860,cj1413c).  
occurs(strainClinical40917,cj1413c).  
occurs(strainClinical38857,cj1413c).  
occurs(strainCjejuniRM1221,cj1413c).  
occurs(strainChicken47693,cj1413c).  
occurs(strainClinical63326,cj1413c).  
occurs(strainClinical64555,cj1413c).  
occurs(strainClinical59364,cj1413c).  
occurs(strainClinical59424,cj1413c).  
occurs(strainClinical33084,cj1413c).  
occurs(strainClinical31481,cj1413c).  
occurs(strainClinical39828,cj1413c).  
occurs(strainBeach1771,cj1413c).  
occurs(strainClinical53250,cj1413c).  
occurs(strainClinical45557,cj1413c).  
occurs(strainClinical47939,cj1413c).  
occurs(strainClinicalG1,cj1414c).  
occurs(strainChickenicken11974,cj1414c).  
occurs(strainChickenicken13249,cj1414c).  
occurs(strainChickenicken13411,cj1414c).  
occurs(strainClinical44811,cj1414c).  
occurs(strainClinical48612,cj1414c).  
occurs(strainClinical58473,cj1414c).  
occurs(strainChicken11848,cj1414c).  
occurs(strainChicken12567,cj1414c).  
occurs(strainChicken11919,cj1414c).  
occurs(strainChicken11973,cj1414c).  
occurs(strainChicken13713,cj1414c).  
occurs(strainBeach1791,cj1414c).  
occurs(strainClinical43205,cj1414c).  
occurs(strainClinical33106,cj1414c).  
occurs(strainClinical38556,cj1414c).  
occurs(strainClinical39182,cj1414c).  
occurs(strainClinical44933,cj1414c).  
occurs(strainClinical45631,cj1414c).  
occurs(strainClinical55320,cj1414c).  
occurs(strainClinical55703,cj1414c).  
occurs(strainClinical30280,cj1414c).  
occurs(strainClinical30328,cj1414c).  
occurs(strainClinical41651,cj1414c).  
occurs(strainClinical40671,cj1414c).

occurs(strainClinical44958,cj1414c).  
occurs(strainClinical52331,cj1414c).  
occurs(strainClinical56281,cj1414c).  
occurs(strainClinical56282,cj1414c).  
occurs(strainClinical56832,cj1414c).  
occurs(strainOvine12241,cj1414c).  
occurs(strainOvine12481,cj1414c).  
occurs(strainChickenicken12912,cj1414c).  
occurs(strainChicken12196,cj1414c).  
occurs(strainChickenicken12450,cj1414c).  
occurs(strainChickenicken12487,cj1414c).  
occurs(strainChickenicken13082,cj1414c).  
occurs(strainChickenicken13040,cj1414c).  
occurs(strainChickenicken11856,cj1414c).  
occurs(strainClinical36069,cj1414c).  
occurs(strainChicken40209,cj1414c).  
occurs(strainBeach1793,cj1414c).  
occurs(strainClinical56519,cj1414c).  
occurs(strainClinical44119,cj1414c).  
occurs(strainClinical34007,cj1414c).  
occurs(strainClinicalinical15168,cj1414c).  
occurs(strainClinical18836,cj1414c).  
occurs(strainClinical38857,cj1414c).  
occurs(strainCjejuniRM1221,cj1414c).  
occurs(strainChicken47693,cj1414c).  
occurs(strainClinical63326,cj1414c).  
occurs(strainClinical64555,cj1414c).  
occurs(strainClinical59364,cj1414c).  
occurs(strainClinical59424,cj1414c).  
occurs(strainClinical33084,cj1414c).  
occurs(strainClinical31481,cj1414c).  
occurs(strainClinical39828,cj1414c).  
occurs(strainBeach1771,cj1414c).  
occurs(strainClinical53250,cj1414c).  
occurs(strainClinical45557,cj1414c).  
occurs(strainClinical47939,cj1414c).  
occurs(strainClinicalG1,cj1415c).  
occurs(strainClinicalG3,cj1415c).  
occurs(strainChickenicken11974,cj1415c).  
occurs(strainChickenicken13249,cj1415c).  
occurs(strainChickenicken13411,cj1415c).  
occurs(strainClinical44811,cj1415c).  
occurs(strainClinical48612,cj1415c).  
occurs(strainClinical58473,cj1415c).  
occurs(strainChicken11848,cj1415c).  
occurs(strainChicken12567,cj1415c).  
occurs(strainChicken11919,cj1415c).  
occurs(strainChicken11973,cj1415c).  
occurs(strainChicken13713,cj1415c).  
occurs(strainBeach1791,cj1415c).  
occurs(strainClinical43205,cj1415c).  
occurs(strainClinical33106,cj1415c).  
occurs(strainClinical55703,cj1415c).  
occurs(strainClinical30280,cj1415c).



occurs(strainClinical30328,cj1415c).  
occurs(strainClinical41651,cj1415c).  
occurs(strainClinical32799,cj1415c).  
occurs(strainClinical43983,cj1415c).  
occurs(strainClinical40671,cj1415c).  
occurs(strainClinical44958,cj1415c).  
occurs(strainClinical52331,cj1415c).  
occurs(strainClinical56281,cj1415c).  
occurs(strainClinical56282,cj1415c).  
occurs(strainClinical56832,cj1415c).  
occurs(strainOvine12241,cj1415c).  
occurs(strainOvine12481,cj1415c).  
occurs(strainBovinevineine13305,cj1415c).  
occurs(strainChickenicken12912,cj1415c).  
occurs(strainChickenicken11818,cj1415c).  
occurs(strainChicken12196,cj1415c).  
occurs(strainChickenicken12450,cj1415c).  
occurs(strainChickenicken12487,cj1415c).  
occurs(strainChickenicken13082,cj1415c).  
occurs(strainChickenicken13040,cj1415c).  
occurs(strainChickenicken11856,cj1415c).  
occurs(strainChicken40209,cj1415c).  
occurs(strainBeach1793,cj1415c).  
occurs(strainClinical32787,cj1415c).  
occurs(strainClinical31467,cj1415c).  
occurs(strainClinical38762,cj1415c).  
occurs(strainClinicalical15168,cj1415c).  
occurs(strainClinical18836,cj1415c).  
occurs(strainClinical38857,cj1415c).  
occurs(strainCjejuniRM1221,cj1415c).  
occurs(strainClinical33084,cj1415c).  
occurs(strainClinical31481,cj1415c).  
occurs(strainClinical39828,cj1415c).  
occurs(strainClinical45557,cj1415c).  
occurs(strainClinicalG1,cj1416c).  
occurs(strainClinicalG3,cj1416c).  
occurs(strainChickenicken11974,cj1416c).  
occurs(strainChickenicken13249,cj1416c).  
occurs(strainChickenicken13411,cj1416c).  
occurs(strainClinical44811,cj1416c).  
occurs(strainClinical48612,cj1416c).  
occurs(strainClinical58473,cj1416c).  
occurs(strainChicken11848,cj1416c).  
occurs(strainChicken12567,cj1416c).  
occurs(strainChicken11919,cj1416c).  
occurs(strainChicken11973,cj1416c).  
occurs(strainChicken13713,cj1416c).  
occurs(strainBeach1791,cj1416c).  
occurs(strainClinical43205,cj1416c).  
occurs(strainClinical33106,cj1416c).  
occurs(strainClinical55320,cj1416c).  
occurs(strainClinical55703,cj1416c).  
occurs(strainClinical30280,cj1416c).  
occurs(strainClinical30328,cj1416c).

occurs(strainClinical41651,cj1416c).  
occurs(strainClinical32799,cj1416c).  
occurs(strainClinical43983,cj1416c).  
occurs(strainClinical40671,cj1416c).  
occurs(strainClinical44958,cj1416c).  
occurs(strainClinical52331,cj1416c).  
occurs(strainClinical56281,cj1416c).  
occurs(strainClinical56282,cj1416c).  
occurs(strainClinical56832,cj1416c).  
occurs(strainOvine12241,cj1416c).  
occurs(strainOvine12481,cj1416c).  
occurs(strainBovinevineine13305,cj1416c).  
occurs(strainChickenicken12912,cj1416c).  
occurs(strainChickenicken11818,cj1416c).  
occurs(strainChicken12196,cj1416c).  
occurs(strainChickenicken12450,cj1416c).  
occurs(strainChickenicken12487,cj1416c).  
occurs(strainChickenicken13082,cj1416c).  
occurs(strainChickenicken13040,cj1416c).  
occurs(strainChickenicken11856,cj1416c).  
occurs(strainChicken40209,cj1416c).  
occurs(strainBeach1793,cj1416c).  
occurs(strainClinical81116,cj1416c).  
occurs(strainClinical56519,cj1416c).  
occurs(strainClinical32787,cj1416c).  
occurs(strainClinical31467,cj1416c).  
occurs(strainClinical38762,cj1416c).  
occurs(strainClinicalinical15168,cj1416c).  
occurs(strainClinical18836,cj1416c).  
occurs(strainClinicalM1,cj1416c).  
occurs(strainClinical36860,cj1416c).  
occurs(strainClinical40917,cj1416c).  
occurs(strainClinical38857,cj1416c).  
occurs(strainChicken47693,cj1416c).  
occurs(strainClinical33084,cj1416c).  
occurs(strainClinical31481,cj1416c).  
occurs(strainClinical39828,cj1416c).  
occurs(strainClinical53250,cj1416c).  
occurs(strainClinical45557,cj1416c).  
occurs(strainClinicalG1,cj1417c).  
occurs(strainClinicalG3,cj1417c).  
occurs(strainChickenicken11974,cj1417c).  
occurs(strainChickenicken13249,cj1417c).  
occurs(strainChickenicken13411,cj1417c).  
occurs(strainClinical44811,cj1417c).  
occurs(strainClinical48612,cj1417c).  
occurs(strainClinical58473,cj1417c).  
occurs(strainChicken11848,cj1417c).  
occurs(strainChicken12567,cj1417c).  
occurs(strainChicken11919,cj1417c).  
occurs(strainChicken11973,cj1417c).  
occurs(strainChicken13713,cj1417c).  
occurs(strainBeach1791,cj1417c).  
occurs(strainClinical43205,cj1417c).

occurs(strainClinical33106,cj1417c).  
occurs(strainClinical55703,cj1417c).  
occurs(strainClinical30280,cj1417c).  
occurs(strainClinical30328,cj1417c).  
occurs(strainClinical41651,cj1417c).  
occurs(strainClinical32799,cj1417c).  
occurs(strainClinical43983,cj1417c).  
occurs(strainClinical40671,cj1417c).  
occurs(strainClinical44958,cj1417c).  
occurs(strainClinical52331,cj1417c).  
occurs(strainClinical56281,cj1417c).  
occurs(strainClinical56282,cj1417c).  
occurs(strainClinical56832,cj1417c).  
occurs(strainOvine12241,cj1417c).  
occurs(strainOvine12481,cj1417c).  
occurs(strainBovinevineine13305,cj1417c).  
occurs(strainChickenicken12912,cj1417c).  
occurs(strainChickenicken11818,cj1417c).  
occurs(strainChicken12196,cj1417c).  
occurs(strainChickenicken12450,cj1417c).  
occurs(strainChickenicken12487,cj1417c).  
occurs(strainChickenicken13082,cj1417c).  
occurs(strainChickenicken13040,cj1417c).  
occurs(strainChickenicken11856,cj1417c).  
occurs(strainChicken40209,cj1417c).  
occurs(strainBeach1793,cj1417c).  
occurs(strainClinical81116,cj1417c).  
occurs(strainClinical56519,cj1417c).  
occurs(strainClinical32787,cj1417c).  
occurs(strainClinical31467,cj1417c).  
occurs(strainClinical38762,cj1417c).  
occurs(strainClinicalinical15168,cj1417c).  
occurs(strainClinical18836,cj1417c).  
occurs(strainClinicalM1,cj1417c).  
occurs(strainClinical36860,cj1417c).  
occurs(strainClinical40917,cj1417c).  
occurs(strainClinical38857,cj1417c).  
occurs(strainChicken47693,cj1417c).  
occurs(strainClinical33084,cj1417c).  
occurs(strainClinical31481,cj1417c).  
occurs(strainClinical39828,cj1417c).  
occurs(strainClinical53250,cj1417c).  
occurs(strainClinical45557,cj1417c).  
occurs(strainClinicalG1,cj1418c).  
occurs(strainClinicalG3,cj1418c).  
occurs(strainChickenicken11974,cj1418c).  
occurs(strainChickenicken13249,cj1418c).  
occurs(strainChickenicken13411,cj1418c).  
occurs(strainClinical44811,cj1418c).  
occurs(strainClinical48612,cj1418c).  
occurs(strainClinical58473,cj1418c).  
occurs(strainChicken11848,cj1418c).  
occurs(strainChicken12567,cj1418c).  
occurs(strainChicken11919,cj1418c).

occurs(strainChicken11973,cj1418c).  
occurs(strainChicken13713,cj1418c).  
occurs(strainBeach1791,cj1418c).  
occurs(strainClinical43205,cj1418c).  
occurs(strainClinical33106,cj1418c).  
occurs(strainClinical55703,cj1418c).  
occurs(strainClinical30280,cj1418c).  
occurs(strainClinical30328,cj1418c).  
occurs(strainClinical41651,cj1418c).  
occurs(strainClinical32799,cj1418c).  
occurs(strainClinical43983,cj1418c).  
occurs(strainClinical40671,cj1418c).  
occurs(strainClinical44958,cj1418c).  
occurs(strainClinical52331,cj1418c).  
occurs(strainClinical56281,cj1418c).  
occurs(strainClinical56282,cj1418c).  
occurs(strainClinical56832,cj1418c).  
occurs(strainOvine12241,cj1418c).  
occurs(strainOvine12481,cj1418c).  
occurs(strainBovinevineine13305,cj1418c).  
occurs(strainChickenicken12912,cj1418c).  
occurs(strainChickenicken11818,cj1418c).  
occurs(strainChicken12196,cj1418c).  
occurs(strainChickenicken12450,cj1418c).  
occurs(strainChickenicken12487,cj1418c).  
occurs(strainChickenicken13082,cj1418c).  
occurs(strainChickenicken13040,cj1418c).  
occurs(strainChickenicken11856,cj1418c).  
occurs(strainChicken40209,cj1418c).  
occurs(strainBeach1793,cj1418c).  
occurs(strainClinical81116,cj1418c).  
occurs(strainClinical56519,cj1418c).  
occurs(strainClinical32787,cj1418c).  
occurs(strainClinical31467,cj1418c).  
occurs(strainClinical38762,cj1418c).  
occurs(strainClinicalinical15168,cj1418c).  
occurs(strainClinical18836,cj1418c).  
occurs(strainClinicalM1,cj1418c).  
occurs(strainClinical36860,cj1418c).  
occurs(strainClinical40917,cj1418c).  
occurs(strainClinical38857,cj1418c).  
occurs(strainChicken47693,cj1418c).  
occurs(strainClinical33084,cj1418c).  
occurs(strainClinical31481,cj1418c).  
occurs(strainClinical39828,cj1418c).  
occurs(strainClinical53250,cj1418c).  
occurs(strainClinical45557,cj1418c).  
occurs(strainClinicalG1,cj1419c).  
occurs(strainClinicalG3,cj1419c).  
occurs(strainChickenicken11974,cj1419c).  
occurs(strainChickenicken13249,cj1419c).  
occurs(strainChickenicken13411,cj1419c).  
occurs(strainClinical44811,cj1419c).  
occurs(strainClinical48612,cj1419c).

occurs(strainClinical58473,cj1419c).  
occurs(strainChicken11848,cj1419c).  
occurs(strainChicken12567,cj1419c).  
occurs(strainChicken11919,cj1419c).  
occurs(strainChicken11973,cj1419c).  
occurs(strainChicken13713,cj1419c).  
occurs(strainBeach1791,cj1419c).  
occurs(strainClinical43205,cj1419c).  
occurs(strainClinical33106,cj1419c).  
occurs(strainClinical55703,cj1419c).  
occurs(strainClinical30280,cj1419c).  
occurs(strainClinical30328,cj1419c).  
occurs(strainClinical41651,cj1419c).  
occurs(strainClinical32799,cj1419c).  
occurs(strainClinical43983,cj1419c).  
occurs(strainClinical40671,cj1419c).  
occurs(strainClinical44958,cj1419c).  
occurs(strainClinical52331,cj1419c).  
occurs(strainClinical56281,cj1419c).  
occurs(strainClinical56282,cj1419c).  
occurs(strainClinical56832,cj1419c).  
occurs(strainOvine12241,cj1419c).  
occurs(strainOvine12481,cj1419c).  
occurs(strainBovinevineine13305,cj1419c).  
occurs(strainChickenicken12912,cj1419c).  
occurs(strainChickenicken11818,cj1419c).  
occurs(strainChicken12196,cj1419c).  
occurs(strainChickenicken12450,cj1419c).  
occurs(strainChickenicken12487,cj1419c).  
occurs(strainChickenicken13082,cj1419c).  
occurs(strainChickenicken13040,cj1419c).  
occurs(strainChickenicken11856,cj1419c).  
occurs(strainChicken40209,cj1419c).  
occurs(strainBeach1793,cj1419c).  
occurs(strainClinical81116,cj1419c).  
occurs(strainClinical56519,cj1419c).  
occurs(strainClinical32787,cj1419c).  
occurs(strainClinical31467,cj1419c).  
occurs(strainClinical38762,cj1419c).  
occurs(strainClinicalinical15168,cj1419c).  
occurs(strainClinical18836,cj1419c).  
occurs(strainClinicalM1,cj1419c).  
occurs(strainClinical36860,cj1419c).  
occurs(strainClinical40917,cj1419c).  
occurs(strainClinical38857,cj1419c).  
occurs(strainChicken47693,cj1419c).  
occurs(strainClinical33084,cj1419c).  
occurs(strainClinical31481,cj1419c).  
occurs(strainClinical39828,cj1419c).  
occurs(strainClinical53250,cj1419c).  
occurs(strainClinical45557,cj1419c).  
occurs(strainChickenicken13411,cj1421c).  
occurs(strainClinical44811,cj1421c).  
occurs(strainClinical48612,cj1421c).

occurs(strainChicken11848,cj1421c).  
occurs(strainChicken12567,cj1421c).  
occurs(strainChicken11919,cj1421c).  
occurs(strainChicken11973,cj1421c).  
occurs(strainChicken13713,cj1421c).  
occurs(strainBeach1791,cj1421c).  
occurs(strainClinical55703,cj1421c).  
occurs(strainClinical30280,cj1421c).  
occurs(strainClinical30328,cj1421c).  
occurs(strainChickenicken12450,cj1421c).  
occurs(strainChickenicken12487,cj1421c).  
occurs(strainChickenicken13082,cj1421c).  
occurs(strainCjejuniRM1221,cj1421c).  
occurs(strainChickenicken13411,cj1422c).  
occurs(strainClinical44811,cj1422c).  
occurs(strainClinical48612,cj1422c).  
occurs(strainChicken11848,cj1422c).  
occurs(strainChicken12567,cj1422c).  
occurs(strainChicken11919,cj1422c).  
occurs(strainChicken11973,cj1422c).  
occurs(strainChicken13713,cj1422c).  
occurs(strainBeach1791,cj1422c).  
occurs(strainClinical55320,cj1422c).  
occurs(strainClinical55703,cj1422c).  
occurs(strainClinical30280,cj1422c).  
occurs(strainClinical30328,cj1422c).  
occurs(strainChickenicken12450,cj1422c).  
occurs(strainChickenicken12487,cj1422c).  
occurs(strainChickenicken13082,cj1422c).  
occurs(strainChickenicken13411,cj1423c).  
occurs(strainClinical44811,cj1423c).  
occurs(strainClinical48612,cj1423c).  
occurs(strainChicken11848,cj1423c).  
occurs(strainChicken12567,cj1423c).  
occurs(strainChicken11919,cj1423c).  
occurs(strainChicken11973,cj1423c).  
occurs(strainChicken13713,cj1423c).  
occurs(strainBeach1791,cj1423c).  
occurs(strainClinical43205,cj1423c).  
occurs(strainClinical55320,cj1423c).  
occurs(strainClinical55703,cj1423c).  
occurs(strainClinical30280,cj1423c).  
occurs(strainClinical30328,cj1423c).  
occurs(strainClinical41651,cj1423c).  
occurs(strainClinical44958,cj1423c).  
occurs(strainClinical56281,cj1423c).  
occurs(strainClinical56282,cj1423c).  
occurs(strainChickenicken12450,cj1423c).  
occurs(strainChickenicken12487,cj1423c).  
occurs(strainChickenicken13082,cj1423c).  
occurs(strainBeach1793,cj1423c).  
occurs(strainClinical33084,cj1423c).  
occurs(strainClinical53250,cj1423c).  
occurs(strainChickenicken13411,cj1424c).

occurs(strainClinical44811,cj1424c).  
occurs(strainClinical48612,cj1424c).  
occurs(strainChicken11848,cj1424c).  
occurs(strainChicken12567,cj1424c).  
occurs(strainChicken11919,cj1424c).  
occurs(strainChicken11973,cj1424c).  
occurs(strainChicken13713,cj1424c).  
occurs(strainBeach1791,cj1424c).  
occurs(strainClinical43205,cj1424c).  
occurs(strainClinical38556,cj1424c).  
occurs(strainClinical39182,cj1424c).  
occurs(strainClinical45631,cj1424c).  
occurs(strainClinical55320,cj1424c).  
occurs(strainClinical55703,cj1424c).  
occurs(strainClinical30280,cj1424c).  
occurs(strainClinical30328,cj1424c).  
occurs(strainClinical41651,cj1424c).  
occurs(strainClinical43983,cj1424c).  
occurs(strainClinical40671,cj1424c).  
occurs(strainClinical56282,cj1424c).  
occurs(strainOvine12241,cj1424c).  
occurs(strainOvine12481,cj1424c).  
occurs(strainBovinevineine13305,cj1424c).  
occurs(strainChickenicken12450,cj1424c).  
occurs(strainChickenicken12487,cj1424c).  
occurs(strainChickenicken13082,cj1424c).  
occurs(strainChickenicken11856,cj1424c).  
occurs(strainClinical36069,cj1424c).  
occurs(strainClinical32787,cj1424c).  
occurs(strainClinical31467,cj1424c).  
occurs(strainClinical44119,cj1424c).  
occurs(strainClinical34007,cj1424c).  
occurs(strainClinical38762,cj1424c).  
occurs(strainClinical38857,cj1424c).  
occurs(strainChicken47693,cj1424c).  
occurs(strainClinical63326,cj1424c).  
occurs(strainClinical64555,cj1424c).  
occurs(strainClinical59364,cj1424c).  
occurs(strainClinical59424,cj1424c).  
occurs(strainClinical33084,cj1424c).  
occurs(strainClinical31481,cj1424c).  
occurs(strainBeach1771,cj1424c).  
occurs(strainClinical53250,cj1424c).  
occurs(strainChickenicken13411,cj1425c).  
occurs(strainClinical44811,cj1425c).  
occurs(strainClinical48612,cj1425c).  
occurs(strainClinical58473,cj1425c).  
occurs(strainChicken11848,cj1425c).  
occurs(strainChicken12567,cj1425c).  
occurs(strainChicken11919,cj1425c).  
occurs(strainChicken11973,cj1425c).  
occurs(strainChicken13713,cj1425c).  
occurs(strainBeach1791,cj1425c).  
occurs(strainClinical43205,cj1425c).

occurs(strainClinical33106,cj1425c).  
occurs(strainClinical44933,cj1425c).  
occurs(strainClinical55320,cj1425c).  
occurs(strainClinical55703,cj1425c).  
occurs(strainClinical30280,cj1425c).  
occurs(strainClinical30328,cj1425c).  
occurs(strainClinical41651,cj1425c).  
occurs(strainClinical43983,cj1425c).  
occurs(strainClinical40671,cj1425c).  
occurs(strainClinical44958,cj1425c).  
occurs(strainClinical56281,cj1425c).  
occurs(strainClinical56282,cj1425c).  
occurs(strainClinical56832,cj1425c).  
occurs(strainOvine12241,cj1425c).  
occurs(strainChicken12196,cj1425c).  
occurs(strainChickenicken12450,cj1425c).  
occurs(strainChickenicken12487,cj1425c).  
occurs(strainChickenicken13082,cj1425c).  
occurs(strainChickenicken13040,cj1425c).  
occurs(strainChickenicken11856,cj1425c).  
occurs(strainBeach1793,cj1425c).  
occurs(strainClinical56519,cj1425c).  
occurs(strainClinical31467,cj1425c).  
occurs(strainClinical38857,cj1425c).  
occurs(strainChicken47693,cj1425c).  
occurs(strainClinical64555,cj1425c).  
occurs(strainClinical31481,cj1425c).  
occurs(strainBeach1771,cj1425c).  
occurs(strainClinical53250,cj1425c).  
occurs(strainChickenicken13411,cj1426c).  
occurs(strainClinical44811,cj1426c).  
occurs(strainClinical48612,cj1426c).  
occurs(strainChicken11848,cj1426c).  
occurs(strainChicken12567,cj1426c).  
occurs(strainChicken11919,cj1426c).  
occurs(strainChicken11973,cj1426c).  
occurs(strainChicken13713,cj1426c).  
occurs(strainBeach1791,cj1426c).  
occurs(strainClinical55320,cj1426c).  
occurs(strainClinical55703,cj1426c).  
occurs(strainClinical30280,cj1426c).  
occurs(strainClinical30328,cj1426c).  
occurs(strainChickenicken12450,cj1426c).  
occurs(strainChickenicken12487,cj1426c).  
occurs(strainChickenicken13082,cj1426c).  
occurs(strainCjejuniRM1221,cj1426c).  
occurs(strainChickenicken13411,cj1427c).  
occurs(strainClinical44811,cj1427c).  
occurs(strainClinical48612,cj1427c).  
occurs(strainChicken11848,cj1427c).  
occurs(strainChicken12567,cj1427c).  
occurs(strainChicken11919,cj1427c).  
occurs(strainChicken11973,cj1427c).  
occurs(strainChicken13713,cj1427c).



occurs(strainBeach1791,cj1427c).  
occurs(strainClinical43205,cj1427c).  
occurs(strainClinical33106,cj1427c).  
occurs(strainClinical55703,cj1427c).  
occurs(strainClinical30280,cj1427c).  
occurs(strainClinical30328,cj1427c).  
occurs(strainClinical43983,cj1427c).  
occurs(strainClinical40671,cj1427c).  
occurs(strainOvine12241,cj1427c).  
occurs(strainOvine12481,cj1427c).  
occurs(strainBovinevineine13305,cj1427c).  
occurs(strainChickenicken12450,cj1427c).  
occurs(strainChickenicken12487,cj1427c).  
occurs(strainChickenicken13082,cj1427c).  
occurs(strainClinical33084,cj1427c).  
occurs(strainChickenicken13411,cj1428c).  
occurs(strainClinical44811,cj1428c).  
occurs(strainClinical48612,cj1428c).  
occurs(strainChicken11848,cj1428c).  
occurs(strainChicken12567,cj1428c).  
occurs(strainChicken11919,cj1428c).  
occurs(strainChicken11973,cj1428c).  
occurs(strainChicken13713,cj1428c).  
occurs(strainBeach1791,cj1428c).  
occurs(strainClinical55703,cj1428c).  
occurs(strainClinical30280,cj1428c).  
occurs(strainClinical30328,cj1428c).  
occurs(strainChickenicken12450,cj1428c).  
occurs(strainChickenicken12487,cj1428c).  
occurs(strainChickenicken13082,cj1428c).  
occurs(strainBeach1793,cj1428c).  
occurs(strainChickenicken13411,cj1429c).  
occurs(strainClinical44811,cj1429c).  
occurs(strainClinical48612,cj1429c).  
occurs(strainChicken11848,cj1429c).  
occurs(strainChicken12567,cj1429c).  
occurs(strainChicken11919,cj1429c).  
occurs(strainChicken11973,cj1429c).  
occurs(strainChicken13713,cj1429c).  
occurs(strainBeach1791,cj1429c).  
occurs(strainClinical55703,cj1429c).  
occurs(strainClinical30280,cj1429c).  
occurs(strainClinical30328,cj1429c).  
occurs(strainChickenicken12450,cj1429c).  
occurs(strainChickenicken12487,cj1429c).  
occurs(strainChickenicken13082,cj1429c).  
occurs(strainBeach1793,cj1429c).  
occurs(strainClinical38857,cj1429c).  
occurs(strainChickenicken13411,cj1430c).  
occurs(strainClinical44811,cj1430c).  
occurs(strainClinical48612,cj1430c).  
occurs(strainChicken11848,cj1430c).  
occurs(strainChicken12567,cj1430c).  
occurs(strainChicken11919,cj1430c).

occurs(strainChicken11973,cj1430c).  
occurs(strainChicken13713,cj1430c).  
occurs(strainBeach1791,cj1430c).  
occurs(strainClinical55320,cj1430c).  
occurs(strainClinical55703,cj1430c).  
occurs(strainClinical30280,cj1430c).  
occurs(strainClinical30328,cj1430c).  
occurs(strainChickenicken12450,cj1430c).  
occurs(strainChickenicken12487,cj1430c).  
occurs(strainChickenicken13082,cj1430c).  
occurs(strainBeach1793,cj1430c).  
occurs(strainChickenicken13411,cj1431c).  
occurs(strainClinical44811,cj1431c).  
occurs(strainClinical48612,cj1431c).  
occurs(strainChicken11848,cj1431c).  
occurs(strainChicken12567,cj1431c).  
occurs(strainChicken11919,cj1431c).  
occurs(strainChicken11973,cj1431c).  
occurs(strainChicken13713,cj1431c).  
occurs(strainBeach1791,cj1431c).  
occurs(strainClinical55703,cj1431c).  
occurs(strainClinical30280,cj1431c).  
occurs(strainClinical30328,cj1431c).  
occurs(strainChickenicken12450,cj1431c).  
occurs(strainChickenicken12487,cj1431c).  
occurs(strainChickenicken13082,cj1431c).  
occurs(strainChicken40209,cj1431c).  
occurs(strainChickenicken13411,cj1432c).  
occurs(strainClinical44811,cj1432c).  
occurs(strainClinical48612,cj1432c).  
occurs(strainChicken11848,cj1432c).  
occurs(strainChicken12567,cj1432c).  
occurs(strainChicken11919,cj1432c).  
occurs(strainChicken11973,cj1432c).  
occurs(strainChicken13713,cj1432c).  
occurs(strainBeach1791,cj1432c).  
occurs(strainClinical55320,cj1432c).  
occurs(strainClinical55703,cj1432c).  
occurs(strainClinical30280,cj1432c).  
occurs(strainClinical30328,cj1432c).  
occurs(strainChickenicken12450,cj1432c).  
occurs(strainChickenicken12487,cj1432c).  
occurs(strainChickenicken13082,cj1432c).  
occurs(strainChickenicken13411,cj1433c).  
occurs(strainClinical44811,cj1433c).  
occurs(strainClinical48612,cj1433c).  
occurs(strainChicken11848,cj1433c).  
occurs(strainChicken12567,cj1433c).  
occurs(strainChicken11919,cj1433c).  
occurs(strainChicken11973,cj1433c).  
occurs(strainChicken13713,cj1433c).  
occurs(strainBeach1791,cj1433c).  
occurs(strainClinical55320,cj1433c).  
occurs(strainClinical55703,cj1433c).

occurs(strainClinical30280,cj1433c).  
occurs(strainClinical30328,cj1433c).  
occurs(strainClinical43983,cj1433c).  
occurs(strainChickenicken12450,cj1433c).  
occurs(strainChickenicken12487,cj1433c).  
occurs(strainChickenicken13082,cj1433c).  
occurs(strainChickenicken13411,cj1434c).  
occurs(strainClinical44811,cj1434c).  
occurs(strainClinical48612,cj1434c).  
occurs(strainChicken11848,cj1434c).  
occurs(strainChicken11919,cj1434c).  
occurs(strainChicken11973,cj1434c).  
occurs(strainChicken13713,cj1434c).  
occurs(strainBeach1791,cj1434c).  
occurs(strainClinical55703,cj1434c).  
occurs(strainClinical30280,cj1434c).  
occurs(strainClinical30328,cj1434c).  
occurs(strainChickenicken12450,cj1434c).  
occurs(strainChickenicken12487,cj1434c).  
occurs(strainChickenicken13082,cj1434c).  
occurs(strainChickenicken13411,cj1435c).  
occurs(strainClinical44811,cj1435c).  
occurs(strainClinical48612,cj1435c).  
occurs(strainChicken11848,cj1435c).  
occurs(strainChicken12567,cj1435c).  
occurs(strainChicken11919,cj1435c).  
occurs(strainChicken11973,cj1435c).  
occurs(strainChicken13713,cj1435c).  
occurs(strainBeach1791,cj1435c).  
occurs(strainClinical55703,cj1435c).  
occurs(strainClinical30280,cj1435c).  
occurs(strainClinical30328,cj1435c).  
occurs(strainClinical43983,cj1435c).  
occurs(strainChickenicken12450,cj1435c).  
occurs(strainChickenicken12487,cj1435c).  
occurs(strainChickenicken13082,cj1435c).  
occurs(strainClinical36439,cj1435c).  
occurs(strainChickenicken13411,cj1436c).  
occurs(strainClinical44811,cj1436c).  
occurs(strainClinical48612,cj1436c).  
occurs(strainChicken11848,cj1436c).  
occurs(strainChicken12567,cj1436c).  
occurs(strainChicken11919,cj1436c).  
occurs(strainChicken11973,cj1436c).  
occurs(strainChicken13713,cj1436c).  
occurs(strainBeach1791,cj1436c).  
occurs(strainClinical55320,cj1436c).  
occurs(strainClinical55703,cj1436c).  
occurs(strainClinical30280,cj1436c).  
occurs(strainClinical30328,cj1436c).  
occurs(strainChickenicken12450,cj1436c).  
occurs(strainChickenicken12487,cj1436c).  
occurs(strainChickenicken13082,cj1436c).  
occurs(strainChickenicken13411,cj1437c).

occurs(strainClinical44811,cj1437c).  
occurs(strainClinical48612,cj1437c).  
occurs(strainChicken11848,cj1437c).  
occurs(strainChicken12567,cj1437c).  
occurs(strainChicken11919,cj1437c).  
occurs(strainChicken11973,cj1437c).  
occurs(strainChicken13713,cj1437c).  
occurs(strainBeach1791,cj1437c).  
occurs(strainClinical55703,cj1437c).  
occurs(strainClinical30280,cj1437c).  
occurs(strainClinical30328,cj1437c).  
occurs(strainChickenicken12450,cj1437c).  
occurs(strainChickenicken12487,cj1437c).  
occurs(strainChickenicken13082,cj1437c).  
occurs(strainChickenicken13411,cj1438c).  
occurs(strainClinical44811,cj1438c).  
occurs(strainClinical48612,cj1438c).  
occurs(strainChicken11848,cj1438c).  
occurs(strainChicken12567,cj1438c).  
occurs(strainChicken11919,cj1438c).  
occurs(strainChicken11973,cj1438c).  
occurs(strainChicken13713,cj1438c).  
occurs(strainBeach1791,cj1438c).  
occurs(strainClinical55703,cj1438c).  
occurs(strainClinical30280,cj1438c).  
occurs(strainClinical30328,cj1438c).  
occurs(strainChickenicken12450,cj1438c).  
occurs(strainChickenicken12487,cj1438c).  
occurs(strainChickenicken13082,cj1438c).  
occurs(strainChickenicken13411,cj1439c).  
occurs(strainClinical44811,cj1439c).  
occurs(strainClinical48612,cj1439c).  
occurs(strainChicken11848,cj1439c).  
occurs(strainChicken12567,cj1439c).  
occurs(strainChicken11919,cj1439c).  
occurs(strainChicken11973,cj1439c).  
occurs(strainChicken13713,cj1439c).  
occurs(strainBeach1791,cj1439c).  
occurs(strainClinical55703,cj1439c).  
occurs(strainClinical30280,cj1439c).  
occurs(strainClinical30328,cj1439c).  
occurs(strainClinical43983,cj1439c).  
occurs(strainChickenicken12450,cj1439c).  
occurs(strainChickenicken12487,cj1439c).  
occurs(strainChickenicken13082,cj1439c).  
occurs(strainClinical36439,cj1439c).  
occurs(strainChickenicken13411,cj1440c).  
occurs(strainClinical44811,cj1440c).  
occurs(strainClinical48612,cj1440c).  
occurs(strainChicken11848,cj1440c).  
occurs(strainChicken12567,cj1440c).  
occurs(strainChicken11919,cj1440c).  
occurs(strainChicken11973,cj1440c).  
occurs(strainChicken13713,cj1440c).

occurs(strainBeach1791,cj1440c).  
occurs(strainClinical55320,cj1440c).  
occurs(strainClinical55703,cj1440c).  
occurs(strainClinical30280,cj1440c).  
occurs(strainClinical30328,cj1440c).  
occurs(strainClinical56281,cj1440c).  
occurs(strainChickenicken12450,cj1440c).  
occurs(strainChickenicken12487,cj1440c).  
occurs(strainChickenicken13082,cj1440c).  
occurs(strainChickenicken13411,cj1441c).  
occurs(strainClinical44811,cj1441c).  
occurs(strainClinical48612,cj1441c).  
occurs(strainChicken11848,cj1441c).  
occurs(strainChicken12567,cj1441c).  
occurs(strainChicken11919,cj1441c).  
occurs(strainChicken11973,cj1441c).  
occurs(strainChicken13713,cj1441c).  
occurs(strainBeach1791,cj1441c).  
occurs(strainClinical55320,cj1441c).  
occurs(strainClinical55703,cj1441c).  
occurs(strainClinical30280,cj1441c).  
occurs(strainClinical30328,cj1441c).  
occurs(strainClinical56281,cj1441c).  
occurs(strainChickenicken12450,cj1441c).  
occurs(strainChickenicken12487,cj1441c).  
occurs(strainChickenicken13082,cj1441c).  
occurs(strainChickenicken13411,cj1442c).  
occurs(strainClinical44811,cj1442c).  
occurs(strainClinical48612,cj1442c).  
occurs(strainClinical58473,cj1442c).  
occurs(strainChicken11848,cj1442c).  
occurs(strainChicken12567,cj1442c).  
occurs(strainChicken11919,cj1442c).  
occurs(strainChicken11973,cj1442c).  
occurs(strainChicken13713,cj1442c).  
occurs(strainBeach1791,cj1442c).  
occurs(strainClinical43205,cj1442c).  
occurs(strainClinical55703,cj1442c).  
occurs(strainClinical30280,cj1442c).  
occurs(strainClinical30328,cj1442c).  
occurs(strainClinical41651,cj1442c).  
occurs(strainClinical43983,cj1442c).  
occurs(strainClinical40671,cj1442c).  
occurs(strainClinical44958,cj1442c).  
occurs(strainClinical52331,cj1442c).  
occurs(strainClinical56281,cj1442c).  
occurs(strainClinical56282,cj1442c).  
occurs(strainOvine12241,cj1442c).  
occurs(strainOvine12481,cj1442c).  
occurs(strainBovinevineine13305,cj1442c).  
occurs(strainChickenicken11818,cj1442c).  
occurs(strainChicken12196,cj1442c).  
occurs(strainChickenicken12450,cj1442c).  
occurs(strainChickenicken12487,cj1442c).

occurs(strainChickenicken13082,cj1442c).  
occurs(strainChickenicken13040,cj1442c).  
occurs(strainChickenicken11856,cj1442c).  
occurs(strainClinical56519,cj1442c).  
occurs(strainChicken47693,cj1442c).  
occurs(strainBeach1771,cj1442c).  
occurs(strainClinical53250,cj1442c).  
occurs(strainClinicalG1,cj1443c).  
occurs(strainClinicalG3,cj1443c).  
occurs(strainChickenicken11974,cj1443c).  
occurs(strainChickenicken13249,cj1443c).  
occurs(strainChickenicken13411,cj1443c).  
occurs(strainClinical44811,cj1443c).  
occurs(strainClinical48612,cj1443c).  
occurs(strainClinical58473,cj1443c).  
occurs(strainChicken11848,cj1443c).  
occurs(strainChicken12567,cj1443c).  
occurs(strainChicken11919,cj1443c).  
occurs(strainChicken11973,cj1443c).  
occurs(strainChicken13713,cj1443c).  
occurs(strainBeach1791,cj1443c).  
occurs(strainClinical43205,cj1443c).  
occurs(strainClinical33106,cj1443c).  
occurs(strainClinical38556,cj1443c).  
occurs(strainClinical39182,cj1443c).  
occurs(strainClinical44933,cj1443c).  
occurs(strainClinical45631,cj1443c).  
occurs(strainClinical55320,cj1443c).  
occurs(strainClinical55703,cj1443c).  
occurs(strainClinical30280,cj1443c).  
occurs(strainClinical30328,cj1443c).  
occurs(strainClinical41651,cj1443c).  
occurs(strainClinical32799,cj1443c).  
occurs(strainClinical43983,cj1443c).  
occurs(strainClinical40671,cj1443c).  
occurs(strainClinical44958,cj1443c).  
occurs(strainClinical52331,cj1443c).  
occurs(strainClinical56281,cj1443c).  
occurs(strainClinical56282,cj1443c).  
occurs(strainClinical56832,cj1443c).  
occurs(strainOvine12241,cj1443c).  
occurs(strainOvine12481,cj1443c).  
occurs(strainBovinevineine13305,cj1443c).  
occurs(strainChicken12196,cj1443c).  
occurs(strainChickenicken12450,cj1443c).  
occurs(strainChickenicken12487,cj1443c).  
occurs(strainChickenicken13082,cj1443c).  
occurs(strainChickenicken13040,cj1443c).  
occurs(strainChickenicken11856,cj1443c).  
occurs(strainClinical36069,cj1443c).  
occurs(strainChicken40209,cj1443c).  
occurs(strainBeach1793,cj1443c).  
occurs(strainClinical81116,cj1443c).  
occurs(strainClinical56519,cj1443c).

occurs(strainClinical44119,cj1443c).  
occurs(strainClinical34007,cj1443c).  
occurs(strainClinical15168,cj1443c).  
occurs(strainClinical18836,cj1443c).  
occurs(strainClinicalM1,cj1443c).  
occurs(strainClinical36860,cj1443c).  
occurs(strainClinical40917,cj1443c).  
occurs(strainClinical38857,cj1443c).  
occurs(strainChicken47693,cj1443c).  
occurs(strainClinical63326,cj1443c).  
occurs(strainClinical64555,cj1443c).  
occurs(strainClinical59364,cj1443c).  
occurs(strainClinical59424,cj1443c).  
occurs(strainClinical33084,cj1443c).  
occurs(strainClinical31481,cj1443c).  
occurs(strainClinical39828,cj1443c).  
occurs(strainBeach1771,cj1443c).  
occurs(strainClinical53250,cj1443c).  
occurs(strainClinical45557,cj1443c).  
occurs(strainClinical47939,cj1443c).  
occurs(strainClinicalG1,cj1444c).  
occurs(strainClinicalG3,cj1444c).  
occurs(strainChickenicken11974,cj1444c).  
occurs(strainChickenicken13249,cj1444c).  
occurs(strainChickenicken13411,cj1444c).  
occurs(strainClinical44811,cj1444c).  
occurs(strainClinical48612,cj1444c).  
occurs(strainClinical58473,cj1444c).  
occurs(strainChicken11848,cj1444c).  
occurs(strainChicken12567,cj1444c).  
occurs(strainChicken11919,cj1444c).  
occurs(strainChicken11973,cj1444c).  
occurs(strainChicken13713,cj1444c).  
occurs(strainBeach1791,cj1444c).  
occurs(strainClinical43205,cj1444c).  
occurs(strainClinical33106,cj1444c).  
occurs(strainClinical38556,cj1444c).  
occurs(strainClinical39182,cj1444c).  
occurs(strainClinical44933,cj1444c).  
occurs(strainClinical45631,cj1444c).  
occurs(strainClinical55320,cj1444c).  
occurs(strainClinical55703,cj1444c).  
occurs(strainClinical30280,cj1444c).  
occurs(strainClinical30328,cj1444c).  
occurs(strainClinical41651,cj1444c).  
occurs(strainClinical32799,cj1444c).  
occurs(strainClinical43983,cj1444c).  
occurs(strainClinical40671,cj1444c).  
occurs(strainClinical44958,cj1444c).  
occurs(strainClinical52331,cj1444c).  
occurs(strainClinical56281,cj1444c).  
occurs(strainClinical56282,cj1444c).  
occurs(strainClinical56832,cj1444c).  
occurs(strainOvine12241,cj1444c).

occurs(strainOvine12481,cj1444c).  
occurs(strainBovinevineine13305,cj1444c).  
occurs(strainChickenicken12912,cj1444c).  
occurs(strainChickenicken11818,cj1444c).  
occurs(strainChicken12196,cj1444c).  
occurs(strainChickenicken12450,cj1444c).  
occurs(strainChickenicken12487,cj1444c).  
occurs(strainChickenicken13082,cj1444c).  
occurs(strainChickenicken13040,cj1444c).  
occurs(strainChickenicken11856,cj1444c).  
occurs(strainClinical36069,cj1444c).  
occurs(strainChicken40209,cj1444c).  
occurs(strainBeach1793,cj1444c).  
occurs(strainClinical81116,cj1444c).  
occurs(strainClinical36439,cj1444c).  
occurs(strainClinical56519,cj1444c).  
occurs(strainClinical32787,cj1444c).  
occurs(strainClinical31467,cj1444c).  
occurs(strainClinical44119,cj1444c).  
occurs(strainClinical34007,cj1444c).  
occurs(strainClinical38762,cj1444c).  
occurs(strainClinicalclinical15168,cj1444c).  
occurs(strainClinical18836,cj1444c).  
occurs(strainClinicalM1,cj1444c).  
occurs(strainClinical36860,cj1444c).  
occurs(strainClinical40917,cj1444c).  
occurs(strainClinical38857,cj1444c).  
occurs(strainCjejuniRM1221,cj1444c).  
occurs(strainChicken47693,cj1444c).  
occurs(strainClinical63326,cj1444c).  
occurs(strainClinical64555,cj1444c).  
occurs(strainClinical59364,cj1444c).  
occurs(strainClinical59424,cj1444c).  
occurs(strainClinical33084,cj1444c).  
occurs(strainClinical31481,cj1444c).  
occurs(strainClinical39828,cj1444c).  
occurs(strainBeach1771,cj1444c).  
occurs(strainClinical53250,cj1444c).  
occurs(strainClinical45557,cj1444c).  
occurs(strainClinical47939,cj1444c).  
occurs(strainClinicalG1,cj1445c).  
occurs(strainChickenicken11974,cj1445c).  
occurs(strainChickenicken13249,cj1445c).  
occurs(strainChickenicken13411,cj1445c).  
occurs(strainClinical44811,cj1445c).  
occurs(strainClinical48612,cj1445c).  
occurs(strainClinical58473,cj1445c).  
occurs(strainChicken11848,cj1445c).  
occurs(strainChicken12567,cj1445c).  
occurs(strainChicken11919,cj1445c).  
occurs(strainChicken11973,cj1445c).  
occurs(strainChicken13713,cj1445c).  
occurs(strainBeach1791,cj1445c).  
occurs(strainClinical43205,cj1445c).



occurs(strainClinical33106,cj1445c).  
occurs(strainClinical38556,cj1445c).  
occurs(strainClinical39182,cj1445c).  
occurs(strainClinical44933,cj1445c).  
occurs(strainClinical45631,cj1445c).  
occurs(strainClinical55320,cj1445c).  
occurs(strainClinical55703,cj1445c).  
occurs(strainClinical30280,cj1445c).  
occurs(strainClinical30328,cj1445c).  
occurs(strainClinical41651,cj1445c).  
occurs(strainClinical43983,cj1445c).  
occurs(strainClinical40671,cj1445c).  
occurs(strainClinical44958,cj1445c).  
occurs(strainClinical52331,cj1445c).  
occurs(strainClinical56281,cj1445c).  
occurs(strainClinical56282,cj1445c).  
occurs(strainClinical56832,cj1445c).  
occurs(strainOvine12241,cj1445c).  
occurs(strainOvine12481,cj1445c).  
occurs(strainBovinevineine13305,cj1445c).  
occurs(strainChickenicken12912,cj1445c).  
occurs(strainChicken12196,cj1445c).  
occurs(strainChickenicken12450,cj1445c).  
occurs(strainChickenicken12487,cj1445c).  
occurs(strainChickenicken13082,cj1445c).  
occurs(strainChickenicken13040,cj1445c).  
occurs(strainChickenicken11856,cj1445c).  
occurs(strainClinical36069,cj1445c).  
occurs(strainChicken40209,cj1445c).  
occurs(strainBeach1793,cj1445c).  
occurs(strainClinical81116,cj1445c).  
occurs(strainClinical36439,cj1445c).  
occurs(strainClinical56519,cj1445c).  
occurs(strainClinical32787,cj1445c).  
occurs(strainClinical31467,cj1445c).  
occurs(strainClinical44119,cj1445c).  
occurs(strainClinical34007,cj1445c).  
occurs(strainClinical38762,cj1445c).  
occurs(strainClinicalclinical15168,cj1445c).  
occurs(strainClinical18836,cj1445c).  
occurs(strainClinicalM1,cj1445c).  
occurs(strainClinical36860,cj1445c).  
occurs(strainClinical40917,cj1445c).  
occurs(strainClinical38857,cj1445c).  
occurs(strainCjejuniRM1221,cj1445c).  
occurs(strainChicken47693,cj1445c).  
occurs(strainClinical63326,cj1445c).  
occurs(strainClinical64555,cj1445c).  
occurs(strainClinical59364,cj1445c).  
occurs(strainClinical59424,cj1445c).  
occurs(strainClinical33084,cj1445c).  
occurs(strainClinical31481,cj1445c).  
occurs(strainBeach1771,cj1445c).  
occurs(strainClinical53250,cj1445c).

occurs(strainClinical45557,cj1445c).  
occurs(strainClinical47939,cj1445c).  
occurs(strainChickenicken13411,cj1447c).  
occurs(strainClinical44811,cj1447c).  
occurs(strainClinical48612,cj1447c).  
occurs(strainClinical58473,cj1447c).  
occurs(strainChicken11848,cj1447c).  
occurs(strainChicken12567,cj1447c).  
occurs(strainChicken11919,cj1447c).  
occurs(strainChicken11973,cj1447c).  
occurs(strainChicken13713,cj1447c).  
occurs(strainBeach1791,cj1447c).  
occurs(strainClinical43205,cj1447c).  
occurs(strainClinical55703,cj1447c).  
occurs(strainClinical30280,cj1447c).  
occurs(strainClinical30328,cj1447c).  
occurs(strainChickenicken12912,cj1447c).  
occurs(strainChickenicken12450,cj1447c).  
occurs(strainChickenicken12487,cj1447c).  
occurs(strainChickenicken13082,cj1447c).  
occurs(strainChicken40209,cj1447c).  
occurs(strainClinical81116,cj1447c).  
occurs(strainCjejuniRM1221,cj1447c).  
occurs(strainChickenicken13411,cj1448c).  
occurs(strainClinical44811,cj1448c).  
occurs(strainClinical48612,cj1448c).  
occurs(strainClinical58473,cj1448c).  
occurs(strainChicken11848,cj1448c).  
occurs(strainChicken12567,cj1448c).  
occurs(strainChicken11919,cj1448c).  
occurs(strainChicken11973,cj1448c).  
occurs(strainChicken13713,cj1448c).  
occurs(strainBeach1791,cj1448c).  
occurs(strainClinical43205,cj1448c).  
occurs(strainClinical55320,cj1448c).  
occurs(strainClinical55703,cj1448c).  
occurs(strainClinical30280,cj1448c).  
occurs(strainClinical30328,cj1448c).  
occurs(strainChickenicken12912,cj1448c).  
occurs(strainChickenicken12450,cj1448c).  
occurs(strainChickenicken12487,cj1448c).  
occurs(strainChickenicken13082,cj1448c).  
occurs(strainChicken40209,cj1448c).  
occurs(strainBeach1793,cj1448c).  
occurs(strainClinical81116,cj1448c).  
occurs(strainClinical36860,cj1448c).  
occurs(strainClinical53250,cj1448c).  
occurs0(strainClinicalG1,cj1413c).  
occurs0(strainClinicalG3,cj1413c).  
occurs0(strainChickenicken11974,cj1413c).  
occurs0(strainChickenicken13249,cj1413c).  
occurs0(strainChickenicken13411,cj1413c).  
occurs0(strainClinical44811,cj1413c).  
occurs0(strainClinical48612,cj1413c).

occurs0(strainClinical58473,cj1413c).  
occurs0(strainChicken11848,cj1413c).  
occurs0(strainChicken12567,cj1413c).  
occurs0(strainChicken11919,cj1413c).  
occurs0(strainChicken11973,cj1413c).  
occurs0(strainChicken13713,cj1413c).  
occurs0(strainBeach1791,cj1413c).  
occurs0(strainClinical43205,cj1413c).  
occurs0(strainClinical33106,cj1413c).  
occurs0(strainClinical138556,cj1413c).  
occurs0(strainClinical139182,cj1413c).  
occurs0(strainClinical44933,cj1413c).  
occurs0(strainClinical45631,cj1413c).  
occurs0(strainClinical55320,cj1413c).  
occurs0(strainClinical55703,cj1413c).  
occurs0(strainClinical30280,cj1413c).  
occurs0(strainClinical30328,cj1413c).  
occurs0(strainClinical41651,cj1413c).  
occurs0(strainClinical32799,cj1413c).  
occurs0(strainClinical43983,cj1413c).  
occurs0(strainClinical40671,cj1413c).  
occurs0(strainClinical44958,cj1413c).  
occurs0(strainClinical52331,cj1413c).  
occurs0(strainClinical56281,cj1413c).  
occurs0(strainClinical56282,cj1413c).  
occurs0(strainClinical56832,cj1413c).  
occurs0(strainOvine12241,cj1413c).  
occurs0(strainOvine12481,cj1413c).  
occurs0(strainBovinevineine13305,cj1413c).  
occurs0(strainChickenicken12912,cj1413c).  
occurs0(strainChickenicken11818,cj1413c).  
occurs0(strainChicken12196,cj1413c).  
occurs0(strainChickenicken12450,cj1413c).  
occurs0(strainChickenicken12487,cj1413c).  
occurs0(strainChickenicken13082,cj1413c).  
occurs0(strainChickenicken13040,cj1413c).  
occurs0(strainChickenicken11856,cj1413c).  
occurs0(strainClinical36069,cj1413c).  
occurs0(strainChicken40209,cj1413c).  
occurs0(strainBeach1793,cj1413c).  
occurs0(strainClinical81116,cj1413c).  
occurs0(strainClinical36439,cj1413c).  
occurs0(strainClinical56519,cj1413c).  
occurs0(strainClinical32787,cj1413c).  
occurs0(strainClinical131467,cj1413c).  
occurs0(strainClinical44119,cj1413c).  
occurs0(strainClinical34007,cj1413c).  
occurs0(strainClinical38762,cj1413c).  
occurs0(strainClinicalclinical15168,cj1413c).  
occurs0(strainClinical18836,cj1413c).  
occurs0(strainClinicalM1,cj1413c).  
occurs0(strainClinical36860,cj1413c).  
occurs0(strainClinical40917,cj1413c).  
occurs0(strainClinical38857,cj1413c).

occurs0(strainCjejuniRM1221,cj1413c).  
occurs0(strainChicken47693,cj1413c).  
occurs0(strainClinical63326,cj1413c).  
occurs0(strainClinical64555,cj1413c).  
occurs0(strainClinical59364,cj1413c).  
occurs0(strainClinical59424,cj1413c).  
occurs0(strainClinical33084,cj1413c).  
occurs0(strainClinical31481,cj1413c).  
occurs0(strainClinical39828,cj1413c).  
occurs0(strainBeach1771,cj1413c).  
occurs0(strainClinical53250,cj1413c).  
occurs0(strainClinical45557,cj1413c).  
occurs0(strainClinical47939,cj1413c).  
occurs0(strainClinicalG1,cj1414c).  
occurs0(strainChickenicken11974,cj1414c).  
occurs0(strainChickenicken13249,cj1414c).  
occurs0(strainChickenicken13411,cj1414c).  
occurs0(strainClinical44811,cj1414c).  
occurs0(strainClinical48612,cj1414c).  
occurs0(strainClinical58473,cj1414c).  
occurs0(strainChicken11848,cj1414c).  
occurs0(strainChicken12567,cj1414c).  
occurs0(strainChicken11919,cj1414c).  
occurs0(strainChicken11973,cj1414c).  
occurs0(strainChicken13713,cj1414c).  
occurs0(strainBeach1791,cj1414c).  
occurs0(strainClinical43205,cj1414c).  
occurs0(strainClinical33106,cj1414c).  
occurs0(strainClinical38556,cj1414c).  
occurs0(strainClinical39182,cj1414c).  
occurs0(strainClinical44933,cj1414c).  
occurs0(strainClinical45631,cj1414c).  
occurs0(strainClinical55320,cj1414c).  
occurs0(strainClinical55703,cj1414c).  
occurs0(strainClinical30280,cj1414c).  
occurs0(strainClinical30328,cj1414c).  
occurs0(strainClinical41651,cj1414c).  
occurs0(strainClinical40671,cj1414c).  
occurs0(strainClinical44958,cj1414c).  
occurs0(strainClinical52331,cj1414c).  
occurs0(strainClinical56281,cj1414c).  
occurs0(strainClinical56282,cj1414c).  
occurs0(strainClinical56832,cj1414c).  
occurs0(strainOvine12241,cj1414c).  
occurs0(strainOvine12481,cj1414c).  
occurs0(strainChickenicken12912,cj1414c).  
occurs0(strainChicken12196,cj1414c).  
occurs0(strainChickenicken12450,cj1414c).  
occurs0(strainChickenicken12487,cj1414c).  
occurs0(strainChickenicken13082,cj1414c).  
occurs0(strainChickenicken13040,cj1414c).  
occurs0(strainChickenicken11856,cj1414c).  
occurs0(strainClinical36069,cj1414c).  
occurs0(strainChicken40209,cj1414c).

occurs0(strainBeach1793,cj1414c).  
occurs0(strainClinical56519,cj1414c).  
occurs0(strainClinical44119,cj1414c).  
occurs0(strainClinical34007,cj1414c).  
occurs0(strainClinicalclinical15168,cj1414c).  
occurs0(strainClinical18836,cj1414c).  
occurs0(strainClinical38857,cj1414c).  
occurs0(strainCjejuniRM1221,cj1414c).  
occurs0(strainChicken47693,cj1414c).  
occurs0(strainClinical63326,cj1414c).  
occurs0(strainClinical64555,cj1414c).  
occurs0(strainClinical59364,cj1414c).  
occurs0(strainClinical59424,cj1414c).  
occurs0(strainClinical33084,cj1414c).  
occurs0(strainClinical31481,cj1414c).  
occurs0(strainClinical39828,cj1414c).  
occurs0(strainBeach1771,cj1414c).  
occurs0(strainClinical53250,cj1414c).  
occurs0(strainClinical45557,cj1414c).  
occurs0(strainClinical47939,cj1414c).  
occurs0(strainClinicalG1,cj1415c).  
occurs0(strainClinicalG3,cj1415c).  
occurs0(strainChickenicken11974,cj1415c).  
occurs0(strainChickenicken13249,cj1415c).  
occurs0(strainChickenicken13411,cj1415c).  
occurs0(strainClinical44811,cj1415c).  
occurs0(strainClinical48612,cj1415c).  
occurs0(strainClinical58473,cj1415c).  
occurs0(strainChicken11848,cj1415c).  
occurs0(strainChicken12567,cj1415c).  
occurs0(strainChicken11919,cj1415c).  
occurs0(strainChicken11973,cj1415c).  
occurs0(strainChicken13713,cj1415c).  
occurs0(strainBeach1791,cj1415c).  
occurs0(strainClinical43205,cj1415c).  
occurs0(strainClinical33106,cj1415c).  
occurs0(strainClinical55703,cj1415c).  
occurs0(strainClinical30280,cj1415c).  
occurs0(strainClinical30328,cj1415c).  
occurs0(strainClinical41651,cj1415c).  
occurs0(strainClinical32799,cj1415c).  
occurs0(strainClinical43983,cj1415c).  
occurs0(strainClinical40671,cj1415c).  
occurs0(strainClinical44958,cj1415c).  
occurs0(strainClinical52331,cj1415c).  
occurs0(strainClinical56281,cj1415c).  
occurs0(strainClinical56282,cj1415c).  
occurs0(strainClinical56832,cj1415c).  
occurs0(strainOvine12241,cj1415c).  
occurs0(strainOvine12481,cj1415c).  
occurs0(strainBovinevineine13305,cj1415c).  
occurs0(strainChickenicken12912,cj1415c).  
occurs0(strainChickenicken11818,cj1415c).  
occurs0(strainChicken12196,cj1415c).

occurs0(strainChickenicken12450,cj1415c).  
occurs0(strainChickenicken12487,cj1415c).  
occurs0(strainChickenicken13082,cj1415c).  
occurs0(strainChickenicken13040,cj1415c).  
occurs0(strainChickenicken11856,cj1415c).  
occurs0(strainChicken40209,cj1415c).  
occurs0(strainBeach1793,cj1415c).  
occurs0(strainClinical32787,cj1415c).  
occurs0(strainClinical31467,cj1415c).  
occurs0(strainClinical38762,cj1415c).  
occurs0(strainClinicalical15168,cj1415c).  
occurs0(strainClinical18836,cj1415c).  
occurs0(strainClinical38857,cj1415c).  
occurs0(strainCjejuniRM1221,cj1415c).  
occurs0(strainClinical33084,cj1415c).  
occurs0(strainClinical31481,cj1415c).  
occurs0(strainClinical39828,cj1415c).  
occurs0(strainClinical45557,cj1415c).  
occurs0(strainClinicalG1,cj1416c).  
occurs0(strainClinicalG3,cj1416c).  
occurs0(strainChickenicken11974,cj1416c).  
occurs0(strainChickenicken13249,cj1416c).  
occurs0(strainChickenicken13411,cj1416c).  
occurs0(strainClinical44811,cj1416c).  
occurs0(strainClinical48612,cj1416c).  
occurs0(strainClinical58473,cj1416c).  
occurs0(strainChicken11848,cj1416c).  
occurs0(strainChicken12567,cj1416c).  
occurs0(strainChicken11919,cj1416c).  
occurs0(strainChicken11973,cj1416c).  
occurs0(strainChicken13713,cj1416c).  
occurs0(strainBeach1791,cj1416c).  
occurs0(strainClinical43205,cj1416c).  
occurs0(strainClinical33106,cj1416c).  
occurs0(strainClinical55320,cj1416c).  
occurs0(strainClinical55703,cj1416c).  
occurs0(strainClinical30280,cj1416c).  
occurs0(strainClinical30328,cj1416c).  
occurs0(strainClinical41651,cj1416c).  
occurs0(strainClinical32799,cj1416c).  
occurs0(strainClinical43983,cj1416c).  
occurs0(strainClinical40671,cj1416c).  
occurs0(strainClinical44958,cj1416c).  
occurs0(strainClinical52331,cj1416c).  
occurs0(strainClinical56281,cj1416c).  
occurs0(strainClinical56282,cj1416c).  
occurs0(strainClinical56832,cj1416c).  
occurs0(strainOvine12241,cj1416c).  
occurs0(strainOvine12481,cj1416c).  
occurs0(strainBovinevineine13305,cj1416c).  
occurs0(strainChickenicken12912,cj1416c).  
occurs0(strainChickenicken11818,cj1416c).  
occurs0(strainChicken12196,cj1416c).  
occurs0(strainChickenicken12450,cj1416c).

occurs0(strainChickenicken12487,cj1416c).  
occurs0(strainChickenicken13082,cj1416c).  
occurs0(strainChickenicken13040,cj1416c).  
occurs0(strainChickenicken11856,cj1416c).  
occurs0(strainChicken40209,cj1416c).  
occurs0(strainBeach1793,cj1416c).  
occurs0(strainClinical81116,cj1416c).  
occurs0(strainClinical56519,cj1416c).  
occurs0(strainClinical32787,cj1416c).  
occurs0(strainClinical31467,cj1416c).  
occurs0(strainClinical38762,cj1416c).  
occurs0(strainClinicalical15168,cj1416c).  
occurs0(strainClinical18836,cj1416c).  
occurs0(strainClinicalM1,cj1416c).  
occurs0(strainClinical36860,cj1416c).  
occurs0(strainClinical40917,cj1416c).  
occurs0(strainClinical38857,cj1416c).  
occurs0(strainChicken47693,cj1416c).  
occurs0(strainClinical33084,cj1416c).  
occurs0(strainClinical31481,cj1416c).  
occurs0(strainClinical39828,cj1416c).  
occurs0(strainClinical53250,cj1416c).  
occurs0(strainClinical45557,cj1416c).  
occurs0(strainClinicalG1,cj1417c).  
occurs0(strainClinicalG3,cj1417c).  
occurs0(strainChickenicken11974,cj1417c).  
occurs0(strainChickenicken13249,cj1417c).  
occurs0(strainChickenicken13411,cj1417c).  
occurs0(strainClinical44811,cj1417c).  
occurs0(strainClinical48612,cj1417c).  
occurs0(strainClinical58473,cj1417c).  
occurs0(strainChicken11848,cj1417c).  
occurs0(strainChicken12567,cj1417c).  
occurs0(strainChicken11919,cj1417c).  
occurs0(strainChicken11973,cj1417c).  
occurs0(strainChicken13713,cj1417c).  
occurs0(strainBeach1791,cj1417c).  
occurs0(strainClinical43205,cj1417c).  
occurs0(strainClinical33106,cj1417c).  
occurs0(strainClinical55703,cj1417c).  
occurs0(strainClinical30280,cj1417c).  
occurs0(strainClinical30328,cj1417c).  
occurs0(strainClinical41651,cj1417c).  
occurs0(strainClinical32799,cj1417c).  
occurs0(strainClinical43983,cj1417c).  
occurs0(strainClinical40671,cj1417c).  
occurs0(strainClinical44958,cj1417c).  
occurs0(strainClinical52331,cj1417c).  
occurs0(strainClinical56281,cj1417c).  
occurs0(strainClinical56282,cj1417c).  
occurs0(strainClinical56832,cj1417c).  
occurs0(strainOvine12241,cj1417c).  
occurs0(strainOvine12481,cj1417c).  
occurs0(strainBovinevineine13305,cj1417c).

occurs0(strainChickenicken12912,cj1417c).  
occurs0(strainChickenicken11818,cj1417c).  
occurs0(strainChicken12196,cj1417c).  
occurs0(strainChickenicken12450,cj1417c).  
occurs0(strainChickenicken12487,cj1417c).  
occurs0(strainChickenicken13082,cj1417c).  
occurs0(strainChickenicken13040,cj1417c).  
occurs0(strainChickenicken11856,cj1417c).  
occurs0(strainChicken40209,cj1417c).  
occurs0(strainBeach1793,cj1417c).  
occurs0(strainClinical81116,cj1417c).  
occurs0(strainClinical56519,cj1417c).  
occurs0(strainClinical32787,cj1417c).  
occurs0(strainClinical31467,cj1417c).  
occurs0(strainClinical38762,cj1417c).  
occurs0(strainClinicalinical15168,cj1417c).  
occurs0(strainClinical18836,cj1417c).  
occurs0(strainClinicalM1,cj1417c).  
occurs0(strainClinical36860,cj1417c).  
occurs0(strainClinical40917,cj1417c).  
occurs0(strainClinical38857,cj1417c).  
occurs0(strainChicken47693,cj1417c).  
occurs0(strainClinical33084,cj1417c).  
occurs0(strainClinical31481,cj1417c).  
occurs0(strainClinical39828,cj1417c).  
occurs0(strainClinical53250,cj1417c).  
occurs0(strainClinical45557,cj1417c).  
occurs0(strainClinicalG1,cj1418c).  
occurs0(strainClinicalG3,cj1418c).  
occurs0(strainChickenicken11974,cj1418c).  
occurs0(strainChickenicken13249,cj1418c).  
occurs0(strainChickenicken13411,cj1418c).  
occurs0(strainClinical44811,cj1418c).  
occurs0(strainClinical48612,cj1418c).  
occurs0(strainClinical58473,cj1418c).  
occurs0(strainChicken11848,cj1418c).  
occurs0(strainChicken12567,cj1418c).  
occurs0(strainChicken11919,cj1418c).  
occurs0(strainChicken11973,cj1418c).  
occurs0(strainChicken13713,cj1418c).  
occurs0(strainBeach1791,cj1418c).  
occurs0(strainClinical43205,cj1418c).  
occurs0(strainClinical33106,cj1418c).  
occurs0(strainClinical55703,cj1418c).  
occurs0(strainClinical30280,cj1418c).  
occurs0(strainClinical30328,cj1418c).  
occurs0(strainClinical41651,cj1418c).  
occurs0(strainClinical32799,cj1418c).  
occurs0(strainClinical43983,cj1418c).  
occurs0(strainClinical40671,cj1418c).  
occurs0(strainClinical44958,cj1418c).  
occurs0(strainClinical52331,cj1418c).  
occurs0(strainClinical56281,cj1418c).  
occurs0(strainClinical56282,cj1418c).



occurs0(strainClinical56832,cj1418c).  
occurs0(strainOvine12241,cj1418c).  
occurs0(strainOvine12481,cj1418c).  
occurs0(strainBovinevineine13305,cj1418c).  
occurs0(strainChickenicken12912,cj1418c).  
occurs0(strainChickenicken11818,cj1418c).  
occurs0(strainChicken12196,cj1418c).  
occurs0(strainChickenicken12450,cj1418c).  
occurs0(strainChickenicken12487,cj1418c).  
occurs0(strainChickenicken13082,cj1418c).  
occurs0(strainChickenicken13040,cj1418c).  
occurs0(strainChickenicken11856,cj1418c).  
occurs0(strainChicken40209,cj1418c).  
occurs0(strainBeach1793,cj1418c).  
occurs0(strainClinical81116,cj1418c).  
occurs0(strainClinical56519,cj1418c).  
occurs0(strainClinical32787,cj1418c).  
occurs0(strainClinical31467,cj1418c).  
occurs0(strainClinical38762,cj1418c).  
occurs0(strainClinicalical15168,cj1418c).  
occurs0(strainClinical18836,cj1418c).  
occurs0(strainClinicalM1,cj1418c).  
occurs0(strainClinical36860,cj1418c).  
occurs0(strainClinical40917,cj1418c).  
occurs0(strainClinical38857,cj1418c).  
occurs0(strainChicken47693,cj1418c).  
occurs0(strainClinical33084,cj1418c).  
occurs0(strainClinical31481,cj1418c).  
occurs0(strainClinical39828,cj1418c).  
occurs0(strainClinical53250,cj1418c).  
occurs0(strainClinical45557,cj1418c).  
occurs0(strainClinicalG1,cj1419c).  
occurs0(strainClinicalG3,cj1419c).  
occurs0(strainChickenicken11974,cj1419c).  
occurs0(strainChickenicken13249,cj1419c).  
occurs0(strainChickenicken13411,cj1419c).  
occurs0(strainClinical44811,cj1419c).  
occurs0(strainClinical48612,cj1419c).  
occurs0(strainClinical58473,cj1419c).  
occurs0(strainChicken11848,cj1419c).  
occurs0(strainChicken12567,cj1419c).  
occurs0(strainChicken11919,cj1419c).  
occurs0(strainChicken11973,cj1419c).  
occurs0(strainChicken13713,cj1419c).  
occurs0(strainBeach1791,cj1419c).  
occurs0(strainClinical43205,cj1419c).  
occurs0(strainClinical33106,cj1419c).  
occurs0(strainClinical55703,cj1419c).  
occurs0(strainClinical30280,cj1419c).  
occurs0(strainClinical30328,cj1419c).  
occurs0(strainClinical41651,cj1419c).  
occurs0(strainClinical32799,cj1419c).  
occurs0(strainClinical43983,cj1419c).  
occurs0(strainClinical40671,cj1419c).

occurs0(strainClinical44958,cj1419c).  
occurs0(strainClinical52331,cj1419c).  
occurs0(strainClinical56281,cj1419c).  
occurs0(strainClinical56282,cj1419c).  
occurs0(strainClinical56832,cj1419c).  
occurs0(strainOvine12241,cj1419c).  
occurs0(strainOvine12481,cj1419c).  
occurs0(strainBovinevineine13305,cj1419c).  
occurs0(strainChickenicken12912,cj1419c).  
occurs0(strainChickenicken11818,cj1419c).  
occurs0(strainChicken12196,cj1419c).  
occurs0(strainChickenicken12450,cj1419c).  
occurs0(strainChickenicken12487,cj1419c).  
occurs0(strainChickenicken13082,cj1419c).  
occurs0(strainChickenicken13040,cj1419c).  
occurs0(strainChickenicken11856,cj1419c).  
occurs0(strainChicken40209,cj1419c).  
occurs0(strainBeach1793,cj1419c).  
occurs0(strainClinical81116,cj1419c).  
occurs0(strainClinical56519,cj1419c).  
occurs0(strainClinical32787,cj1419c).  
occurs0(strainClinical31467,cj1419c).  
occurs0(strainClinical38762,cj1419c).  
occurs0(strainClinicalinical15168,cj1419c).  
occurs0(strainClinical18836,cj1419c).  
occurs0(strainClinicalM1,cj1419c).  
occurs0(strainClinical36860,cj1419c).  
occurs0(strainClinical40917,cj1419c).  
occurs0(strainClinical38857,cj1419c).  
occurs0(strainChicken47693,cj1419c).  
occurs0(strainClinical33084,cj1419c).  
occurs0(strainClinical31481,cj1419c).  
occurs0(strainClinical39828,cj1419c).  
occurs0(strainClinical53250,cj1419c).  
occurs0(strainClinical45557,cj1419c).  
occurs0(strainChickenicken13411,cj1421c).  
occurs0(strainClinical44811,cj1421c).  
occurs0(strainClinical48612,cj1421c).  
occurs0(strainChicken11848,cj1421c).  
occurs0(strainChicken12567,cj1421c).  
occurs0(strainChicken11919,cj1421c).  
occurs0(strainChicken11973,cj1421c).  
occurs0(strainChicken13713,cj1421c).  
occurs0(strainBeach1791,cj1421c).  
occurs0(strainClinical55703,cj1421c).  
occurs0(strainClinical30280,cj1421c).  
occurs0(strainClinical30328,cj1421c).  
occurs0(strainChickenicken12450,cj1421c).  
occurs0(strainChickenicken12487,cj1421c).  
occurs0(strainChickenicken13082,cj1421c).  
occurs0(strainCjejuniRM1221,cj1421c).  
occurs0(strainChickenicken13411,cj1422c).  
occurs0(strainClinical44811,cj1422c).  
occurs0(strainClinical48612,cj1422c).

occurs0(strainChicken11848,cj1422c).  
occurs0(strainChicken12567,cj1422c).  
occurs0(strainChicken11919,cj1422c).  
occurs0(strainChicken11973,cj1422c).  
occurs0(strainChicken13713,cj1422c).  
occurs0(strainBeach1791,cj1422c).  
occurs0(strainClinical55320,cj1422c).  
occurs0(strainClinical55703,cj1422c).  
occurs0(strainClinical30280,cj1422c).  
occurs0(strainClinical30328,cj1422c).  
occurs0(strainChickenicken12450,cj1422c).  
occurs0(strainChickenicken12487,cj1422c).  
occurs0(strainChickenicken13082,cj1422c).  
occurs0(strainChickenicken13411,cj1423c).  
occurs0(strainClinical44811,cj1423c).  
occurs0(strainClinical48612,cj1423c).  
occurs0(strainChicken11848,cj1423c).  
occurs0(strainChicken12567,cj1423c).  
occurs0(strainChicken11919,cj1423c).  
occurs0(strainChicken11973,cj1423c).  
occurs0(strainChicken13713,cj1423c).  
occurs0(strainBeach1791,cj1423c).  
occurs0(strainClinical43205,cj1423c).  
occurs0(strainClinical55320,cj1423c).  
occurs0(strainClinical55703,cj1423c).  
occurs0(strainClinical30280,cj1423c).  
occurs0(strainClinical30328,cj1423c).  
occurs0(strainClinical41651,cj1423c).  
occurs0(strainClinical44958,cj1423c).  
occurs0(strainClinical56281,cj1423c).  
occurs0(strainClinical56282,cj1423c).  
occurs0(strainChickenicken12450,cj1423c).  
occurs0(strainChickenicken12487,cj1423c).  
occurs0(strainChickenicken13082,cj1423c).  
occurs0(strainBeach1793,cj1423c).  
occurs0(strainClinical33084,cj1423c).  
occurs0(strainClinical53250,cj1423c).  
occurs0(strainChickenicken13411,cj1424c).  
occurs0(strainClinical44811,cj1424c).  
occurs0(strainClinical48612,cj1424c).  
occurs0(strainChicken11848,cj1424c).  
occurs0(strainChicken12567,cj1424c).  
occurs0(strainChicken11919,cj1424c).  
occurs0(strainChicken11973,cj1424c).  
occurs0(strainChicken13713,cj1424c).  
occurs0(strainBeach1791,cj1424c).  
occurs0(strainClinical43205,cj1424c).  
occurs0(strainClinical38556,cj1424c).  
occurs0(strainClinical39182,cj1424c).  
occurs0(strainClinical45631,cj1424c).  
occurs0(strainClinical55320,cj1424c).  
occurs0(strainClinical55703,cj1424c).  
occurs0(strainClinical30280,cj1424c).  
occurs0(strainClinical30328,cj1424c).

occurs0(strainClinical41651,cj1424c).  
occurs0(strainClinical43983,cj1424c).  
occurs0(strainClinical40671,cj1424c).  
occurs0(strainClinical56282,cj1424c).  
occurs0(strainOvine12241,cj1424c).  
occurs0(strainOvine12481,cj1424c).  
occurs0(strainBovinevineine13305,cj1424c).  
occurs0(strainChickenicken12450,cj1424c).  
occurs0(strainChickenicken12487,cj1424c).  
occurs0(strainChickenicken13082,cj1424c).  
occurs0(strainChickenicken11856,cj1424c).  
occurs0(strainClinical36069,cj1424c).  
occurs0(strainClinical32787,cj1424c).  
occurs0(strainClinicall31467,cj1424c).  
occurs0(strainClinical44119,cj1424c).  
occurs0(strainClinical34007,cj1424c).  
occurs0(strainClinical38762,cj1424c).  
occurs0(strainClinical38857,cj1424c).  
occurs0(strainChicken47693,cj1424c).  
occurs0(strainClinical63326,cj1424c).  
occurs0(strainClinical64555,cj1424c).  
occurs0(strainClinical59364,cj1424c).  
occurs0(strainClinical59424,cj1424c).  
occurs0(strainClinical33084,cj1424c).  
occurs0(strainClinical31481,cj1424c).  
occurs0(strainBeach1771,cj1424c).  
occurs0(strainClinical53250,cj1424c).  
occurs0(strainChickenicken13411,cj1425c).  
occurs0(strainClinical44811,cj1425c).  
occurs0(strainClinical48612,cj1425c).  
occurs0(strainClinical58473,cj1425c).  
occurs0(strainChicken11848,cj1425c).  
occurs0(strainChicken12567,cj1425c).  
occurs0(strainChicken11919,cj1425c).  
occurs0(strainChicken11973,cj1425c).  
occurs0(strainChicken13713,cj1425c).  
occurs0(strainBeach1791,cj1425c).  
occurs0(strainClinical43205,cj1425c).  
occurs0(strainClinical33106,cj1425c).  
occurs0(strainClinical44933,cj1425c).  
occurs0(strainClinical55320,cj1425c).  
occurs0(strainClinical55703,cj1425c).  
occurs0(strainClinical30280,cj1425c).  
occurs0(strainClinical30328,cj1425c).  
occurs0(strainClinical41651,cj1425c).  
occurs0(strainClinical43983,cj1425c).  
occurs0(strainClinical40671,cj1425c).  
occurs0(strainClinical44958,cj1425c).  
occurs0(strainClinical56281,cj1425c).  
occurs0(strainClinical56282,cj1425c).  
occurs0(strainClinical56832,cj1425c).  
occurs0(strainOvine12241,cj1425c).  
occurs0(strainChicken12196,cj1425c).  
occurs0(strainChickenicken12450,cj1425c).

occurs0(strainChickenicken12487,cj1425c).  
occurs0(strainChickenicken13082,cj1425c).  
occurs0(strainChickenicken13040,cj1425c).  
occurs0(strainChickenicken11856,cj1425c).  
occurs0(strainBeach1793,cj1425c).  
occurs0(strainClinical56519,cj1425c).  
occurs0(strainClinical31467,cj1425c).  
occurs0(strainClinical38857,cj1425c).  
occurs0(strainChicken47693,cj1425c).  
occurs0(strainClinical64555,cj1425c).  
occurs0(strainClinical31481,cj1425c).  
occurs0(strainBeach1771,cj1425c).  
occurs0(strainClinical53250,cj1425c).  
occurs0(strainChickenicken13411,cj1426c).  
occurs0(strainClinical44811,cj1426c).  
occurs0(strainClinical48612,cj1426c).  
occurs0(strainChicken11848,cj1426c).  
occurs0(strainChicken12567,cj1426c).  
occurs0(strainChicken11919,cj1426c).  
occurs0(strainChicken11973,cj1426c).  
occurs0(strainChicken13713,cj1426c).  
occurs0(strainBeach1791,cj1426c).  
occurs0(strainClinical55320,cj1426c).  
occurs0(strainClinical55703,cj1426c).  
occurs0(strainClinical30280,cj1426c).  
occurs0(strainClinical30328,cj1426c).  
occurs0(strainChickenicken12450,cj1426c).  
occurs0(strainChickenicken12487,cj1426c).  
occurs0(strainChickenicken13082,cj1426c).  
occurs0(strainCjuniRM1221,cj1426c).  
occurs0(strainChickenicken13411,cj1427c).  
occurs0(strainClinical44811,cj1427c).  
occurs0(strainClinical48612,cj1427c).  
occurs0(strainChicken11848,cj1427c).  
occurs0(strainChicken12567,cj1427c).  
occurs0(strainChicken11919,cj1427c).  
occurs0(strainChicken11973,cj1427c).  
occurs0(strainChicken13713,cj1427c).  
occurs0(strainBeach1791,cj1427c).  
occurs0(strainClinical43205,cj1427c).  
occurs0(strainClinical33106,cj1427c).  
occurs0(strainClinical55703,cj1427c).  
occurs0(strainClinical30280,cj1427c).  
occurs0(strainClinical30328,cj1427c).  
occurs0(strainClinical43983,cj1427c).  
occurs0(strainClinical40671,cj1427c).  
occurs0(strainOvine12241,cj1427c).  
occurs0(strainOvine12481,cj1427c).  
occurs0(strainBovinevineine13305,cj1427c).  
occurs0(strainChickenicken12450,cj1427c).  
occurs0(strainChickenicken12487,cj1427c).  
occurs0(strainChickenicken13082,cj1427c).  
occurs0(strainClinical33084,cj1427c).  
occurs0(strainChickenicken13411,cj1428c).

occurs0(strainClinical44811,cj1428c).  
occurs0(strainClinical48612,cj1428c).  
occurs0(strainChicken11848,cj1428c).  
occurs0(strainChicken12567,cj1428c).  
occurs0(strainChicken11919,cj1428c).  
occurs0(strainChicken11973,cj1428c).  
occurs0(strainChicken13713,cj1428c).  
occurs0(strainBeach1791,cj1428c).  
occurs0(strainClinical55703,cj1428c).  
occurs0(strainClinical30280,cj1428c).  
occurs0(strainClinical30328,cj1428c).  
occurs0(strainChickenicken12450,cj1428c).  
occurs0(strainChickenicken12487,cj1428c).  
occurs0(strainChickenicken13082,cj1428c).  
occurs0(strainBeach1793,cj1428c).  
occurs0(strainChickenicken13411,cj1429c).  
occurs0(strainClinical44811,cj1429c).  
occurs0(strainClinical48612,cj1429c).  
occurs0(strainChicken11848,cj1429c).  
occurs0(strainChicken12567,cj1429c).  
occurs0(strainChicken11919,cj1429c).  
occurs0(strainChicken11973,cj1429c).  
occurs0(strainChicken13713,cj1429c).  
occurs0(strainBeach1791,cj1429c).  
occurs0(strainClinical55703,cj1429c).  
occurs0(strainClinical30280,cj1429c).  
occurs0(strainClinical30328,cj1429c).  
occurs0(strainChickenicken12450,cj1429c).  
occurs0(strainChickenicken12487,cj1429c).  
occurs0(strainChickenicken13082,cj1429c).  
occurs0(strainBeach1793,cj1429c).  
occurs0(strainClinical38857,cj1429c).  
occurs0(strainChickenicken13411,cj1430c).  
occurs0(strainClinical44811,cj1430c).  
occurs0(strainClinical48612,cj1430c).  
occurs0(strainChicken11848,cj1430c).  
occurs0(strainChicken12567,cj1430c).  
occurs0(strainChicken11919,cj1430c).  
occurs0(strainChicken11973,cj1430c).  
occurs0(strainChicken13713,cj1430c).  
occurs0(strainBeach1791,cj1430c).  
occurs0(strainClinical55320,cj1430c).  
occurs0(strainClinical55703,cj1430c).  
occurs0(strainClinical30280,cj1430c).  
occurs0(strainClinical30328,cj1430c).  
occurs0(strainChickenicken12450,cj1430c).  
occurs0(strainChickenicken12487,cj1430c).  
occurs0(strainChickenicken13082,cj1430c).  
occurs0(strainBeach1793,cj1430c).  
occurs0(strainChickenicken13411,cj1431c).  
occurs0(strainClinical44811,cj1431c).  
occurs0(strainClinical48612,cj1431c).  
occurs0(strainChicken11848,cj1431c).  
occurs0(strainChicken12567,cj1431c).

occurs0(strainChicken11919,cj1431c).  
occurs0(strainChicken11973,cj1431c).  
occurs0(strainChicken13713,cj1431c).  
occurs0(strainBeach1791,cj1431c).  
occurs0(strainClinical55703,cj1431c).  
occurs0(strainClinical30280,cj1431c).  
occurs0(strainClinical30328,cj1431c).  
occurs0(strainChickenicken12450,cj1431c).  
occurs0(strainChickenicken12487,cj1431c).  
occurs0(strainChickenicken13082,cj1431c).  
occurs0(strainChicken40209,cj1431c).  
occurs0(strainChickenicken13411,cj1432c).  
occurs0(strainClinical44811,cj1432c).  
occurs0(strainClinical48612,cj1432c).  
occurs0(strainChicken11848,cj1432c).  
occurs0(strainChicken12567,cj1432c).  
occurs0(strainChicken11919,cj1432c).  
occurs0(strainChicken11973,cj1432c).  
occurs0(strainChicken13713,cj1432c).  
occurs0(strainBeach1791,cj1432c).  
occurs0(strainClinical55320,cj1432c).  
occurs0(strainClinical55703,cj1432c).  
occurs0(strainClinical30280,cj1432c).  
occurs0(strainClinical30328,cj1432c).  
occurs0(strainChickenicken12450,cj1432c).  
occurs0(strainChickenicken12487,cj1432c).  
occurs0(strainChickenicken13082,cj1432c).  
occurs0(strainChickenicken13411,cj1433c).  
occurs0(strainClinical44811,cj1433c).  
occurs0(strainClinical48612,cj1433c).  
occurs0(strainChicken11848,cj1433c).  
occurs0(strainChicken12567,cj1433c).  
occurs0(strainChicken11919,cj1433c).  
occurs0(strainChicken11973,cj1433c).  
occurs0(strainChicken13713,cj1433c).  
occurs0(strainBeach1791,cj1433c).  
occurs0(strainClinical55320,cj1433c).  
occurs0(strainClinical55703,cj1433c).  
occurs0(strainClinical30280,cj1433c).  
occurs0(strainClinical30328,cj1433c).  
occurs0(strainClinical43983,cj1433c).  
occurs0(strainChickenicken12450,cj1433c).  
occurs0(strainChickenicken12487,cj1433c).  
occurs0(strainChickenicken13082,cj1433c).  
occurs0(strainChickenicken13411,cj1434c).  
occurs0(strainClinical44811,cj1434c).  
occurs0(strainClinical48612,cj1434c).  
occurs0(strainChicken11848,cj1434c).  
occurs0(strainChicken11919,cj1434c).  
occurs0(strainChicken11973,cj1434c).  
occurs0(strainChicken13713,cj1434c).  
occurs0(strainBeach1791,cj1434c).  
occurs0(strainClinical55703,cj1434c).  
occurs0(strainClinical30280,cj1434c).

occurs0(strainClinical30328,cj1434c).  
occurs0(strainChickenicken12450,cj1434c).  
occurs0(strainChickenicken12487,cj1434c).  
occurs0(strainChickenicken13082,cj1434c).  
occurs0(strainChickenicken13411,cj1435c).  
occurs0(strainClinical44811,cj1435c).  
occurs0(strainClinical48612,cj1435c).  
occurs0(strainChicken11848,cj1435c).  
occurs0(strainChicken12567,cj1435c).  
occurs0(strainChicken11919,cj1435c).  
occurs0(strainChicken11973,cj1435c).  
occurs0(strainChicken13713,cj1435c).  
occurs0(strainBeach1791,cj1435c).  
occurs0(strainClinical55703,cj1435c).  
occurs0(strainClinical30280,cj1435c).  
occurs0(strainClinical30328,cj1435c).  
occurs0(strainClinical43983,cj1435c).  
occurs0(strainChickenicken12450,cj1435c).  
occurs0(strainChickenicken12487,cj1435c).  
occurs0(strainChickenicken13082,cj1435c).  
occurs0(strainClinical36439,cj1435c).  
occurs0(strainChickenicken13411,cj1436c).  
occurs0(strainClinical44811,cj1436c).  
occurs0(strainClinical48612,cj1436c).  
occurs0(strainChicken11848,cj1436c).  
occurs0(strainChicken12567,cj1436c).  
occurs0(strainChicken11919,cj1436c).  
occurs0(strainChicken11973,cj1436c).  
occurs0(strainChicken13713,cj1436c).  
occurs0(strainBeach1791,cj1436c).  
occurs0(strainClinical55320,cj1436c).  
occurs0(strainClinical55703,cj1436c).  
occurs0(strainClinical30280,cj1436c).  
occurs0(strainClinical30328,cj1436c).  
occurs0(strainChickenicken12450,cj1436c).  
occurs0(strainChickenicken12487,cj1436c).  
occurs0(strainChickenicken13082,cj1436c).  
occurs0(strainChickenicken13411,cj1437c).  
occurs0(strainClinical44811,cj1437c).  
occurs0(strainClinical48612,cj1437c).  
occurs0(strainChicken11848,cj1437c).  
occurs0(strainChicken12567,cj1437c).  
occurs0(strainChicken11919,cj1437c).  
occurs0(strainChicken11973,cj1437c).  
occurs0(strainChicken13713,cj1437c).  
occurs0(strainBeach1791,cj1437c).  
occurs0(strainClinical55703,cj1437c).  
occurs0(strainClinical30280,cj1437c).  
occurs0(strainClinical30328,cj1437c).  
occurs0(strainChickenicken12450,cj1437c).  
occurs0(strainChickenicken12487,cj1437c).  
occurs0(strainChickenicken13082,cj1437c).  
occurs0(strainChickenicken13411,cj1438c).  
occurs0(strainClinical44811,cj1438c).



occurs0(strainClinical48612,cj1438c).  
occurs0(strainChicken11848,cj1438c).  
occurs0(strainChicken12567,cj1438c).  
occurs0(strainChicken11919,cj1438c).  
occurs0(strainChicken11973,cj1438c).  
occurs0(strainChicken13713,cj1438c).  
occurs0(strainBeach1791,cj1438c).  
occurs0(strainClinical55703,cj1438c).  
occurs0(strainClinical30280,cj1438c).  
occurs0(strainClinical30328,cj1438c).  
occurs0(strainChickenicken12450,cj1438c).  
occurs0(strainChickenicken12487,cj1438c).  
occurs0(strainChickenicken13082,cj1438c).  
occurs0(strainChickenicken13411,cj1439c).  
occurs0(strainClinical44811,cj1439c).  
occurs0(strainClinical48612,cj1439c).  
occurs0(strainChicken11848,cj1439c).  
occurs0(strainChicken12567,cj1439c).  
occurs0(strainChicken11919,cj1439c).  
occurs0(strainChicken11973,cj1439c).  
occurs0(strainChicken13713,cj1439c).  
occurs0(strainBeach1791,cj1439c).  
occurs0(strainClinical55703,cj1439c).  
occurs0(strainClinical30280,cj1439c).  
occurs0(strainClinical30328,cj1439c).  
occurs0(strainClinical43983,cj1439c).  
occurs0(strainChickenicken12450,cj1439c).  
occurs0(strainChickenicken12487,cj1439c).  
occurs0(strainChickenicken13082,cj1439c).  
occurs0(strainClinical36439,cj1439c).  
occurs0(strainChickenicken13411,cj1440c).  
occurs0(strainClinical44811,cj1440c).  
occurs0(strainClinical48612,cj1440c).  
occurs0(strainChicken11848,cj1440c).  
occurs0(strainChicken12567,cj1440c).  
occurs0(strainChicken11919,cj1440c).  
occurs0(strainChicken11973,cj1440c).  
occurs0(strainChicken13713,cj1440c).  
occurs0(strainBeach1791,cj1440c).  
occurs0(strainClinical55320,cj1440c).  
occurs0(strainClinical55703,cj1440c).  
occurs0(strainClinical30280,cj1440c).  
occurs0(strainClinical30328,cj1440c).  
occurs0(strainClinical56281,cj1440c).  
occurs0(strainChickenicken12450,cj1440c).  
occurs0(strainChickenicken12487,cj1440c).  
occurs0(strainChickenicken13082,cj1440c).  
occurs0(strainChickenicken13411,cj1441c).  
occurs0(strainClinical44811,cj1441c).  
occurs0(strainClinical48612,cj1441c).  
occurs0(strainChicken11848,cj1441c).  
occurs0(strainChicken12567,cj1441c).  
occurs0(strainChicken11919,cj1441c).  
occurs0(strainChicken11973,cj1441c).

occurs0(strainChicken13713,cj1441c).  
occurs0(strainBeach1791,cj1441c).  
occurs0(strainClinical55320,cj1441c).  
occurs0(strainClinical55703,cj1441c).  
occurs0(strainClinical30280,cj1441c).  
occurs0(strainClinical30328,cj1441c).  
occurs0(strainClinical56281,cj1441c).  
occurs0(strainChickenicken12450,cj1441c).  
occurs0(strainChickenicken12487,cj1441c).  
occurs0(strainChickenicken13082,cj1441c).  
occurs0(strainChickenicken13411,cj1442c).  
occurs0(strainClinical44811,cj1442c).  
occurs0(strainClinical48612,cj1442c).  
occurs0(strainClinical58473,cj1442c).  
occurs0(strainChicken11848,cj1442c).  
occurs0(strainChicken12567,cj1442c).  
occurs0(strainChicken11919,cj1442c).  
occurs0(strainChicken11973,cj1442c).  
occurs0(strainChicken13713,cj1442c).  
occurs0(strainBeach1791,cj1442c).  
occurs0(strainClinical43205,cj1442c).  
occurs0(strainClinical55703,cj1442c).  
occurs0(strainClinical30280,cj1442c).  
occurs0(strainClinical30328,cj1442c).  
occurs0(strainClinical41651,cj1442c).  
occurs0(strainClinical43983,cj1442c).  
occurs0(strainClinical40671,cj1442c).  
occurs0(strainClinical44958,cj1442c).  
occurs0(strainClinical52331,cj1442c).  
occurs0(strainClinical56281,cj1442c).  
occurs0(strainClinical56282,cj1442c).  
occurs0(strainOvine12241,cj1442c).  
occurs0(strainOvine12481,cj1442c).  
occurs0(strainBovinevineine13305,cj1442c).  
occurs0(strainChickenicken11818,cj1442c).  
occurs0(strainChicken12196,cj1442c).  
occurs0(strainChickenicken12450,cj1442c).  
occurs0(strainChickenicken12487,cj1442c).  
occurs0(strainChickenicken13082,cj1442c).  
occurs0(strainChickenicken13040,cj1442c).  
occurs0(strainChickenicken11856,cj1442c).  
occurs0(strainClinical56519,cj1442c).  
occurs0(strainChicken47693,cj1442c).  
occurs0(strainBeach1771,cj1442c).  
occurs0(strainClinical53250,cj1442c).  
occurs0(strainClinicalG1,cj1443c).  
occurs0(strainClinicalG3,cj1443c).  
occurs0(strainChickenicken11974,cj1443c).  
occurs0(strainChickenicken13249,cj1443c).  
occurs0(strainChickenicken13411,cj1443c).  
occurs0(strainClinical44811,cj1443c).  
occurs0(strainClinical48612,cj1443c).  
occurs0(strainClinical58473,cj1443c).  
occurs0(strainChicken11848,cj1443c).

occurs0(strainChicken12567,cj1443c).  
occurs0(strainChicken11919,cj1443c).  
occurs0(strainChicken11973,cj1443c).  
occurs0(strainChicken13713,cj1443c).  
occurs0(strainBeach1791,cj1443c).  
occurs0(strainClinical43205,cj1443c).  
occurs0(strainClinical33106,cj1443c).  
occurs0(strainClinical38556,cj1443c).  
occurs0(strainClinical39182,cj1443c).  
occurs0(strainClinical44933,cj1443c).  
occurs0(strainClinical45631,cj1443c).  
occurs0(strainClinical55320,cj1443c).  
occurs0(strainClinical55703,cj1443c).  
occurs0(strainClinical30280,cj1443c).  
occurs0(strainClinical30328,cj1443c).  
occurs0(strainClinical41651,cj1443c).  
occurs0(strainClinical32799,cj1443c).  
occurs0(strainClinical43983,cj1443c).  
occurs0(strainClinical40671,cj1443c).  
occurs0(strainClinical44958,cj1443c).  
occurs0(strainClinical52331,cj1443c).  
occurs0(strainClinical56281,cj1443c).  
occurs0(strainClinical56282,cj1443c).  
occurs0(strainClinical56832,cj1443c).  
occurs0(strainOvine12241,cj1443c).  
occurs0(strainOvine12481,cj1443c).  
occurs0(strainBovinevineine13305,cj1443c).  
occurs0(strainChicken12196,cj1443c).  
occurs0(strainChickenicken12450,cj1443c).  
occurs0(strainChickenicken12487,cj1443c).  
occurs0(strainChickenicken13082,cj1443c).  
occurs0(strainChickenicken13040,cj1443c).  
occurs0(strainChickenicken11856,cj1443c).  
occurs0(strainClinical36069,cj1443c).  
occurs0(strainChicken40209,cj1443c).  
occurs0(strainBeach1793,cj1443c).  
occurs0(strainClinical81116,cj1443c).  
occurs0(strainClinical56519,cj1443c).  
occurs0(strainClinical44119,cj1443c).  
occurs0(strainClinical34007,cj1443c).  
occurs0(strainClinicalclinical15168,cj1443c).  
occurs0(strainClinical18836,cj1443c).  
occurs0(strainClinicalM1,cj1443c).  
occurs0(strainClinical36860,cj1443c).  
occurs0(strainClinical40917,cj1443c).  
occurs0(strainClinical38857,cj1443c).  
occurs0(strainChicken47693,cj1443c).  
occurs0(strainClinical63326,cj1443c).  
occurs0(strainClinical64555,cj1443c).  
occurs0(strainClinical59364,cj1443c).  
occurs0(strainClinical59424,cj1443c).  
occurs0(strainClinical33084,cj1443c).  
occurs0(strainClinical31481,cj1443c).  
occurs0(strainClinical39828,cj1443c).

occurs0(strainBeach1771,cj1443c).  
occurs0(strainClinical53250,cj1443c).  
occurs0(strainClinical45557,cj1443c).  
occurs0(strainClinical47939,cj1443c).  
occurs0(strainClinicalG1,cj1444c).  
occurs0(strainClinicalG3,cj1444c).  
occurs0(strainChickenicken11974,cj1444c).  
occurs0(strainChickenicken13249,cj1444c).  
occurs0(strainChickenicken13411,cj1444c).  
occurs0(strainClinical44811,cj1444c).  
occurs0(strainClinical48612,cj1444c).  
occurs0(strainClinical58473,cj1444c).  
occurs0(strainChicken11848,cj1444c).  
occurs0(strainChicken12567,cj1444c).  
occurs0(strainChicken11919,cj1444c).  
occurs0(strainChicken11973,cj1444c).  
occurs0(strainChicken13713,cj1444c).  
occurs0(strainBeach1791,cj1444c).  
occurs0(strainClinical43205,cj1444c).  
occurs0(strainClinical33106,cj1444c).  
occurs0(strainClinical38556,cj1444c).  
occurs0(strainClinical39182,cj1444c).  
occurs0(strainClinical44933,cj1444c).  
occurs0(strainClinical45631,cj1444c).  
occurs0(strainClinical55320,cj1444c).  
occurs0(strainClinical55703,cj1444c).  
occurs0(strainClinical30280,cj1444c).  
occurs0(strainClinical30328,cj1444c).  
occurs0(strainClinical41651,cj1444c).  
occurs0(strainClinical32799,cj1444c).  
occurs0(strainClinical43983,cj1444c).  
occurs0(strainClinical40671,cj1444c).  
occurs0(strainClinical44958,cj1444c).  
occurs0(strainClinical52331,cj1444c).  
occurs0(strainClinical56281,cj1444c).  
occurs0(strainClinical56282,cj1444c).  
occurs0(strainClinical56832,cj1444c).  
occurs0(strainOvine12241,cj1444c).  
occurs0(strainOvine12481,cj1444c).  
occurs0(strainBovinevineine13305,cj1444c).  
occurs0(strainChickenicken12912,cj1444c).  
occurs0(strainChickenicken11818,cj1444c).  
occurs0(strainChicken12196,cj1444c).  
occurs0(strainChickenicken12450,cj1444c).  
occurs0(strainChickenicken12487,cj1444c).  
occurs0(strainChickenicken13082,cj1444c).  
occurs0(strainChickenicken13040,cj1444c).  
occurs0(strainChickenicken11856,cj1444c).  
occurs0(strainClinical36069,cj1444c).  
occurs0(strainChicken40209,cj1444c).  
occurs0(strainBeach1793,cj1444c).  
occurs0(strainClinical81116,cj1444c).  
occurs0(strainClinical36439,cj1444c).  
occurs0(strainClinical56519,cj1444c).

occurs0(strainClinical32787,cj1444c).  
occurs0(strainClinical31467,cj1444c).  
occurs0(strainClinical44119,cj1444c).  
occurs0(strainClinical34007,cj1444c).  
occurs0(strainClinical38762,cj1444c).  
occurs0(strainClinical15168,cj1444c).  
occurs0(strainClinical18836,cj1444c).  
occurs0(strainClinicalM1,cj1444c).  
occurs0(strainClinical36860,cj1444c).  
occurs0(strainClinical40917,cj1444c).  
occurs0(strainClinical38857,cj1444c).  
occurs0(strainCjejuniRM1221,cj1444c).  
occurs0(strainChicken47693,cj1444c).  
occurs0(strainClinical63326,cj1444c).  
occurs0(strainClinical64555,cj1444c).  
occurs0(strainClinical59364,cj1444c).  
occurs0(strainClinical59424,cj1444c).  
occurs0(strainClinical33084,cj1444c).  
occurs0(strainClinical31481,cj1444c).  
occurs0(strainClinical39828,cj1444c).  
occurs0(strainBeach1771,cj1444c).  
occurs0(strainClinical53250,cj1444c).  
occurs0(strainClinical45557,cj1444c).  
occurs0(strainClinical47939,cj1444c).  
occurs0(strainClinicalG1,cj1445c).  
occurs0(strainChickenicken11974,cj1445c).  
occurs0(strainChickenicken13249,cj1445c).  
occurs0(strainChickenicken13411,cj1445c).  
occurs0(strainClinical44811,cj1445c).  
occurs0(strainClinical48612,cj1445c).  
occurs0(strainClinical58473,cj1445c).  
occurs0(strainChicken11848,cj1445c).  
occurs0(strainChicken12567,cj1445c).  
occurs0(strainChicken11919,cj1445c).  
occurs0(strainChicken11973,cj1445c).  
occurs0(strainChicken13713,cj1445c).  
occurs0(strainBeach1791,cj1445c).  
occurs0(strainClinical43205,cj1445c).  
occurs0(strainClinical33106,cj1445c).  
occurs0(strainClinical38556,cj1445c).  
occurs0(strainClinical39182,cj1445c).  
occurs0(strainClinical44933,cj1445c).  
occurs0(strainClinical45631,cj1445c).  
occurs0(strainClinical55320,cj1445c).  
occurs0(strainClinical55703,cj1445c).  
occurs0(strainClinical30280,cj1445c).  
occurs0(strainClinical30328,cj1445c).  
occurs0(strainClinical41651,cj1445c).  
occurs0(strainClinical43983,cj1445c).  
occurs0(strainClinical40671,cj1445c).  
occurs0(strainClinical44958,cj1445c).  
occurs0(strainClinical52331,cj1445c).  
occurs0(strainClinical56281,cj1445c).  
occurs0(strainClinical56282,cj1445c).

occurs0(strainClinical56832,cj1445c).  
occurs0(strainOvine12241,cj1445c).  
occurs0(strainOvine12481,cj1445c).  
occurs0(strainBovinevineine13305,cj1445c).  
occurs0(strainChickenicken12912,cj1445c).  
occurs0(strainChicken12196,cj1445c).  
occurs0(strainChickenicken12450,cj1445c).  
occurs0(strainChickenicken12487,cj1445c).  
occurs0(strainChickenicken13082,cj1445c).  
occurs0(strainChickenicken13040,cj1445c).  
occurs0(strainChickenicken11856,cj1445c).  
occurs0(strainClinical36069,cj1445c).  
occurs0(strainChicken40209,cj1445c).  
occurs0(strainBeach1793,cj1445c).  
occurs0(strainClinical81116,cj1445c).  
occurs0(strainClinical36439,cj1445c).  
occurs0(strainClinical56519,cj1445c).  
occurs0(strainClinical32787,cj1445c).  
occurs0(strainClinical31467,cj1445c).  
occurs0(strainClinical44119,cj1445c).  
occurs0(strainClinical34007,cj1445c).  
occurs0(strainClinical38762,cj1445c).  
occurs0(strainClinicalical15168,cj1445c).  
occurs0(strainClinical18836,cj1445c).  
occurs0(strainClinicalM1,cj1445c).  
occurs0(strainClinical36860,cj1445c).  
occurs0(strainClinical40917,cj1445c).  
occurs0(strainClinical38857,cj1445c).  
occurs0(strainCjejuniRM1221,cj1445c).  
occurs0(strainChicken47693,cj1445c).  
occurs0(strainClinical63326,cj1445c).  
occurs0(strainClinical64555,cj1445c).  
occurs0(strainClinical59364,cj1445c).  
occurs0(strainClinical59424,cj1445c).  
occurs0(strainClinical33084,cj1445c).  
occurs0(strainClinical31481,cj1445c).  
occurs0(strainBeach1771,cj1445c).  
occurs0(strainClinical53250,cj1445c).  
occurs0(strainClinical45557,cj1445c).  
occurs0(strainClinical47939,cj1445c).  
occurs0(strainChickenicken13411,cj1447c).  
occurs0(strainClinical44811,cj1447c).  
occurs0(strainClinical48612,cj1447c).  
occurs0(strainClinical58473,cj1447c).  
occurs0(strainChicken11848,cj1447c).  
occurs0(strainChicken12567,cj1447c).  
occurs0(strainChicken11919,cj1447c).  
occurs0(strainChicken11973,cj1447c).  
occurs0(strainChicken13713,cj1447c).  
occurs0(strainBeach1791,cj1447c).  
occurs0(strainClinical43205,cj1447c).  
occurs0(strainClinical55703,cj1447c).  
occurs0(strainClinical30280,cj1447c).  
occurs0(strainClinical30328,cj1447c).

occurs0(strainChickenicken12912,cj1447c).  
occurs0(strainChickenicken12450,cj1447c).  
occurs0(strainChickenicken12487,cj1447c).  
occurs0(strainChickenicken13082,cj1447c).  
occurs0(strainChicken40209,cj1447c).  
occurs0(strainClinical81116,cj1447c).  
occurs0(strainCjejuniRM1221,cj1447c).  
occurs0(strainChickenicken13411,cj1448c).  
occurs0(strainClinical44811,cj1448c).  
occurs0(strainClinical48612,cj1448c).  
occurs0(strainClinical58473,cj1448c).  
occurs0(strainChicken11848,cj1448c).  
occurs0(strainChicken12567,cj1448c).  
occurs0(strainChicken11919,cj1448c).  
occurs0(strainChicken11973,cj1448c).  
occurs0(strainChicken13713,cj1448c).  
occurs0(strainBeach1791,cj1448c).  
occurs0(strainClinical43205,cj1448c).  
occurs0(strainClinical55320,cj1448c).  
occurs0(strainClinical55703,cj1448c).  
occurs0(strainClinical30280,cj1448c).  
occurs0(strainClinical30328,cj1448c).  
occurs0(strainChickenicken12912,cj1448c).  
occurs0(strainChickenicken12450,cj1448c).  
occurs0(strainChickenicken12487,cj1448c).  
occurs0(strainChickenicken13082,cj1448c).  
occurs0(strainChicken40209,cj1448c).  
occurs0(strainBeach1793,cj1448c).  
occurs0(strainClinical81116,cj1448c).  
occurs0(strainClinical36860,cj1448c).  
occurs0(strainClinical53250,cj1448c).  
absent(strainClinicalG3,cj1414c).  
absent(strainClinical32799,cj1414c).  
absent(strainClinical43983,cj1414c).  
absent(strainBovinevineine13305,cj1414c).  
absent(strainChickenicken11818,cj1414c).  
absent(strainClinical81116,cj1414c).  
absent(strainClinical36439,cj1414c).  
absent(strainClinical32787,cj1414c).  
absent(strainClinicall31467,cj1414c).  
absent(strainClinical38762,cj1414c).  
absent(strainClinicalM1,cj1414c).  
absent(strainClinical36860,cj1414c).  
absent(strainClinical40917,cj1414c).  
absent(strainClinicall38556,cj1415c).  
absent(strainClinicall39182,cj1415c).  
absent(strainClinical44933,cj1415c).  
absent(strainClinical45631,cj1415c).  
absent(strainClinical55320,cj1415c).  
absent(strainClinical36069,cj1415c).  
absent(strainClinical81116,cj1415c).  
absent(strainClinical36439,cj1415c).  
absent(strainClinical56519,cj1415c).  
absent(strainClinical44119,cj1415c).

absent(strainClinical34007,cj1415c).  
absent(strainClinicalM1,cj1415c).  
absent(strainClinical36860,cj1415c).  
absent(strainClinical40917,cj1415c).  
absent(strainChicken47693,cj1415c).  
absent(strainClinical63326,cj1415c).  
absent(strainClinical64555,cj1415c).  
absent(strainClinical59364,cj1415c).  
absent(strainClinical59424,cj1415c).  
absent(strainBeach1771,cj1415c).  
absent(strainClinical53250,cj1415c).  
absent(strainClinical47939,cj1415c).  
absent(strainClinical38556,cj1416c).  
absent(strainClinical39182,cj1416c).  
absent(strainClinical44933,cj1416c).  
absent(strainClinical45631,cj1416c).  
absent(strainClinical36069,cj1416c).  
absent(strainClinical36439,cj1416c).  
absent(strainClinical44119,cj1416c).  
absent(strainClinical34007,cj1416c).  
absent(strainCjejuniRM1221,cj1416c).  
absent(strainClinical63326,cj1416c).  
absent(strainClinical64555,cj1416c).  
absent(strainClinical59364,cj1416c).  
absent(strainClinical59424,cj1416c).  
absent(strainBeach1771,cj1416c).  
absent(strainClinical47939,cj1416c).  
absent(strainClinical38556,cj1417c).  
absent(strainClinical39182,cj1417c).  
absent(strainClinical44933,cj1417c).  
absent(strainClinical45631,cj1417c).  
absent(strainClinical55320,cj1417c).  
absent(strainClinical36069,cj1417c).  
absent(strainClinical36439,cj1417c).  
absent(strainClinical44119,cj1417c).  
absent(strainClinical34007,cj1417c).  
absent(strainCjejuniRM1221,cj1417c).  
absent(strainClinical63326,cj1417c).  
absent(strainClinical64555,cj1417c).  
absent(strainClinical59364,cj1417c).  
absent(strainClinical59424,cj1417c).  
absent(strainBeach1771,cj1417c).  
absent(strainClinical47939,cj1417c).  
absent(strainClinical38556,cj1418c).  
absent(strainClinical39182,cj1418c).  
absent(strainClinical44933,cj1418c).  
absent(strainClinical45631,cj1418c).  
absent(strainClinical55320,cj1418c).  
absent(strainClinical36069,cj1418c).  
absent(strainClinical36439,cj1418c).  
absent(strainClinical44119,cj1418c).  
absent(strainClinical34007,cj1418c).  
absent(strainCjejuniRM1221,cj1418c).  
absent(strainClinical63326,cj1418c).



absent(strainClinical64555,cj1418c).  
absent(strainClinical59364,cj1418c).  
absent(strainClinical59424,cj1418c).  
absent(strainBeach1771,cj1418c).  
absent(strainClinical47939,cj1418c).  
absent(strainClinical138556,cj1419c).  
absent(strainClinical139182,cj1419c).  
absent(strainClinical44933,cj1419c).  
absent(strainClinical45631,cj1419c).  
absent(strainClinical55320,cj1419c).  
absent(strainClinical36069,cj1419c).  
absent(strainClinical36439,cj1419c).  
absent(strainClinical44119,cj1419c).  
absent(strainClinical34007,cj1419c).  
absent(strainCjejuniRM1221,cj1419c).  
absent(strainClinical63326,cj1419c).  
absent(strainClinical64555,cj1419c).  
absent(strainClinical59364,cj1419c).  
absent(strainClinical59424,cj1419c).  
absent(strainBeach1771,cj1419c).  
absent(strainClinical47939,cj1419c).  
absent(strainClinicalG1,cj1421c).  
absent(strainClinicalG3,cj1421c).  
absent(strainChickenicken11974,cj1421c).  
absent(strainChickenicken13249,cj1421c).  
absent(strainClinical58473,cj1421c).  
absent(strainClinical43205,cj1421c).  
absent(strainClinical33106,cj1421c).  
absent(strainClinical138556,cj1421c).  
absent(strainClinical139182,cj1421c).  
absent(strainClinical44933,cj1421c).  
absent(strainClinical45631,cj1421c).  
absent(strainClinical55320,cj1421c).  
absent(strainClinical41651,cj1421c).  
absent(strainClinical32799,cj1421c).  
absent(strainClinical43983,cj1421c).  
absent(strainClinical40671,cj1421c).  
absent(strainClinical44958,cj1421c).  
absent(strainClinical52331,cj1421c).  
absent(strainClinical56281,cj1421c).  
absent(strainClinical56282,cj1421c).  
absent(strainClinical56832,cj1421c).  
absent(strainOvine12241,cj1421c).  
absent(strainOvine12481,cj1421c).  
absent(strainBovinevineine13305,cj1421c).  
absent(strainChickenicken12912,cj1421c).  
absent(strainChickenicken11818,cj1421c).  
absent(strainChicken12196,cj1421c).  
absent(strainChickenicken13040,cj1421c).  
absent(strainChickenicken11856,cj1421c).  
absent(strainClinical36069,cj1421c).  
absent(strainChicken40209,cj1421c).  
absent(strainBeach1793,cj1421c).  
absent(strainClinical81116,cj1421c).

absent(strainClinical36439,cj1421c).  
absent(strainClinical56519,cj1421c).  
absent(strainClinical32787,cj1421c).  
absent(strainClinical31467,cj1421c).  
absent(strainClinical44119,cj1421c).  
absent(strainClinical34007,cj1421c).  
absent(strainClinical38762,cj1421c).  
absent(strainClinical15168,cj1421c).  
absent(strainClinical18836,cj1421c).  
absent(strainClinicalM1,cj1421c).  
absent(strainClinical36860,cj1421c).  
absent(strainClinical40917,cj1421c).  
absent(strainClinical38857,cj1421c).  
absent(strainChicken47693,cj1421c).  
absent(strainClinical63326,cj1421c).  
absent(strainClinical64555,cj1421c).  
absent(strainClinical59364,cj1421c).  
absent(strainClinical59424,cj1421c).  
absent(strainClinical33084,cj1421c).  
absent(strainClinical31481,cj1421c).  
absent(strainClinical39828,cj1421c).  
absent(strainBeach1771,cj1421c).  
absent(strainClinical53250,cj1421c).  
absent(strainClinical45557,cj1421c).  
absent(strainClinical47939,cj1421c).  
absent(strainClinicalG1,cj1422c).  
absent(strainClinicalG3,cj1422c).  
absent(strainChickenicken11974,cj1422c).  
absent(strainChickenicken13249,cj1422c).  
absent(strainClinical58473,cj1422c).  
absent(strainClinical43205,cj1422c).  
absent(strainClinical33106,cj1422c).  
absent(strainClinical38556,cj1422c).  
absent(strainClinical39182,cj1422c).  
absent(strainClinical44933,cj1422c).  
absent(strainClinical45631,cj1422c).  
absent(strainClinical41651,cj1422c).  
absent(strainClinical32799,cj1422c).  
absent(strainClinical43983,cj1422c).  
absent(strainClinical40671,cj1422c).  
absent(strainClinical44958,cj1422c).  
absent(strainClinical52331,cj1422c).  
absent(strainClinical56281,cj1422c).  
absent(strainClinical56282,cj1422c).  
absent(strainClinical56832,cj1422c).  
absent(strainOvine12241,cj1422c).  
absent(strainOvine12481,cj1422c).  
absent(strainBovinevineine13305,cj1422c).  
absent(strainChickenicken12912,cj1422c).  
absent(strainChickenicken11818,cj1422c).  
absent(strainChicken12196,cj1422c).  
absent(strainChickenicken13040,cj1422c).  
absent(strainChickenicken11856,cj1422c).  
absent(strainClinical36069,cj1422c).

absent(strainChicken40209,cj1422c).  
absent(strainBeach1793,cj1422c).  
absent(strainClinical81116,cj1422c).  
absent(strainClinical36439,cj1422c).  
absent(strainClinical56519,cj1422c).  
absent(strainClinical32787,cj1422c).  
absent(strainClinical131467,cj1422c).  
absent(strainClinical44119,cj1422c).  
absent(strainClinical34007,cj1422c).  
absent(strainClinical38762,cj1422c).  
absent(strainClinicalical15168,cj1422c).  
absent(strainClinical18836,cj1422c).  
absent(strainClinicalM1,cj1422c).  
absent(strainClinical36860,cj1422c).  
absent(strainClinical40917,cj1422c).  
absent(strainClinical38857,cj1422c).  
absent(strainCjejuniRM1221,cj1422c).  
absent(strainChicken47693,cj1422c).  
absent(strainClinical63326,cj1422c).  
absent(strainClinical64555,cj1422c).  
absent(strainClinical59364,cj1422c).  
absent(strainClinical59424,cj1422c).  
absent(strainClinical33084,cj1422c).  
absent(strainClinical31481,cj1422c).  
absent(strainBeach1771,cj1422c).  
absent(strainClinical53250,cj1422c).  
absent(strainClinical45557,cj1422c).  
absent(strainClinical47939,cj1422c).  
absent(strainClinicalG1,cj1423c).  
absent(strainClinicalG3,cj1423c).  
absent(strainChickenicken11974,cj1423c).  
absent(strainChickenicken13249,cj1423c).  
absent(strainClinical58473,cj1423c).  
absent(strainClinical33106,cj1423c).  
absent(strainClinical138556,cj1423c).  
absent(strainClinical139182,cj1423c).  
absent(strainClinical44933,cj1423c).  
absent(strainClinical45631,cj1423c).  
absent(strainClinical32799,cj1423c).  
absent(strainClinical43983,cj1423c).  
absent(strainClinical40671,cj1423c).  
absent(strainClinical52331,cj1423c).  
absent(strainClinical56832,cj1423c).  
absent(strainOvine12241,cj1423c).  
absent(strainOvine12481,cj1423c).  
absent(strainBovinevineine13305,cj1423c).  
absent(strainChickenicken12912,cj1423c).  
absent(strainChickenicken11818,cj1423c).  
absent(strainChicken12196,cj1423c).  
absent(strainChickenicken13040,cj1423c).  
absent(strainChickenicken11856,cj1423c).  
absent(strainClinical36069,cj1423c).  
absent(strainChicken40209,cj1423c).  
absent(strainClinical81116,cj1423c).

absent(strainClinical36439,cj1423c).  
absent(strainClinical56519,cj1423c).  
absent(strainClinical32787,cj1423c).  
absent(strainClinical31467,cj1423c).  
absent(strainClinical44119,cj1423c).  
absent(strainClinical34007,cj1423c).  
absent(strainClinical38762,cj1423c).  
absent(strainClinicalinical15168,cj1423c).  
absent(strainClinical18836,cj1423c).  
absent(strainClinicalM1,cj1423c).  
absent(strainClinical36860,cj1423c).  
absent(strainClinical40917,cj1423c).  
absent(strainClinical38857,cj1423c).  
absent(strainCjejuniRM1221,cj1423c).  
absent(strainChicken47693,cj1423c).  
absent(strainClinical63326,cj1423c).  
absent(strainClinical64555,cj1423c).  
absent(strainClinical59364,cj1423c).  
absent(strainClinical59424,cj1423c).  
absent(strainClinical31481,cj1423c).  
absent(strainClinical39828,cj1423c).  
absent(strainBeach1771,cj1423c).  
absent(strainClinical45557,cj1423c).  
absent(strainClinical47939,cj1423c).  
absent(strainClinicalG1,cj1424c).  
absent(strainClinicalG3,cj1424c).  
absent(strainChickenicken11974,cj1424c).  
absent(strainChickenicken13249,cj1424c).  
absent(strainClinical58473,cj1424c).  
absent(strainClinical33106,cj1424c).  
absent(strainClinical44933,cj1424c).  
absent(strainClinical32799,cj1424c).  
absent(strainClinical44958,cj1424c).  
absent(strainClinical52331,cj1424c).  
absent(strainClinical56281,cj1424c).  
absent(strainClinical56832,cj1424c).  
absent(strainChickenicken12912,cj1424c).  
absent(strainChickenicken11818,cj1424c).  
absent(strainChicken12196,cj1424c).  
absent(strainChickenicken13040,cj1424c).  
absent(strainChicken40209,cj1424c).  
absent(strainBeach1793,cj1424c).  
absent(strainClinical36439,cj1424c).  
absent(strainClinical56519,cj1424c).  
absent(strainClinicalinical15168,cj1424c).  
absent(strainClinical18836,cj1424c).  
absent(strainClinicalM1,cj1424c).  
absent(strainClinical36860,cj1424c).  
absent(strainClinical40917,cj1424c).  
absent(strainCjejuniRM1221,cj1424c).  
absent(strainClinical39828,cj1424c).  
absent(strainClinical45557,cj1424c).  
absent(strainClinical47939,cj1424c).  
absent(strainClinicalG1,cj1425c).

absent(strainClinicalG3,cj1425c).  
absent(strainChickenicken11974,cj1425c).  
absent(strainChickenicken13249,cj1425c).  
absent(strainClinical138556,cj1425c).  
absent(strainClinical139182,cj1425c).  
absent(strainClinical145631,cj1425c).  
absent(strainClinical132799,cj1425c).  
absent(strainClinical152331,cj1425c).  
absent(strainOvine12481,cj1425c).  
absent(strainBovinevineine13305,cj1425c).  
absent(strainChickenicken12912,cj1425c).  
absent(strainChickenicken11818,cj1425c).  
absent(strainClinical136069,cj1425c).  
absent(strainChicken40209,cj1425c).  
absent(strainClinical136439,cj1425c).  
absent(strainClinical132787,cj1425c).  
absent(strainClinical144119,cj1425c).  
absent(strainClinical134007,cj1425c).  
absent(strainClinical138762,cj1425c).  
absent(strainClinical115168,cj1425c).  
absent(strainClinical118836,cj1425c).  
absent(strainClinicalM1,cj1425c).  
absent(strainClinical136860,cj1425c).  
absent(strainClinical140917,cj1425c).  
absent(strainCjejuniRM1221,cj1425c).  
absent(strainClinical163326,cj1425c).  
absent(strainClinical159364,cj1425c).  
absent(strainClinical159424,cj1425c).  
absent(strainClinical133084,cj1425c).  
absent(strainClinical139828,cj1425c).  
absent(strainClinical145557,cj1425c).  
absent(strainClinical147939,cj1425c).  
absent(strainClinicalG1,cj1426c).  
absent(strainClinicalG3,cj1426c).  
absent(strainChickenicken11974,cj1426c).  
absent(strainChickenicken13249,cj1426c).  
absent(strainClinical158473,cj1426c).  
absent(strainClinical143205,cj1426c).  
absent(strainClinical133106,cj1426c).  
absent(strainClinical138556,cj1426c).  
absent(strainClinical139182,cj1426c).  
absent(strainClinical144933,cj1426c).  
absent(strainClinical145631,cj1426c).  
absent(strainClinical141651,cj1426c).  
absent(strainClinical132799,cj1426c).  
absent(strainClinical143983,cj1426c).  
absent(strainClinical140671,cj1426c).  
absent(strainClinical144958,cj1426c).  
absent(strainClinical152331,cj1426c).  
absent(strainClinical156281,cj1426c).  
absent(strainClinical156282,cj1426c).  
absent(strainClinical156832,cj1426c).  
absent(strainOvine12241,cj1426c).  
absent(strainOvine12481,cj1426c).

absent(strainBovinevineine13305,cj1426c).  
absent(strainChickenicken12912,cj1426c).  
absent(strainChickenicken11818,cj1426c).  
absent(strainChicken12196,cj1426c).  
absent(strainChickenicken13040,cj1426c).  
absent(strainChickenicken11856,cj1426c).  
absent(strainClinical36069,cj1426c).  
absent(strainChicken40209,cj1426c).  
absent(strainBeach1793,cj1426c).  
absent(strainClinical81116,cj1426c).  
absent(strainClinical36439,cj1426c).  
absent(strainClinical56519,cj1426c).  
absent(strainClinical32787,cj1426c).  
absent(strainClinical31467,cj1426c).  
absent(strainClinical44119,cj1426c).  
absent(strainClinical34007,cj1426c).  
absent(strainClinical38762,cj1426c).  
absent(strainClinicalclinical15168,cj1426c).  
absent(strainClinical18836,cj1426c).  
absent(strainClinicalM1,cj1426c).  
absent(strainClinical36860,cj1426c).  
absent(strainClinical40917,cj1426c).  
absent(strainClinical38857,cj1426c).  
absent(strainChicken47693,cj1426c).  
absent(strainClinical63326,cj1426c).  
absent(strainClinical64555,cj1426c).  
absent(strainClinical59364,cj1426c).  
absent(strainClinical59424,cj1426c).  
absent(strainClinical33084,cj1426c).  
absent(strainClinical31481,cj1426c).  
absent(strainClinical39828,cj1426c).  
absent(strainBeach1771,cj1426c).  
absent(strainClinical53250,cj1426c).  
absent(strainClinical45557,cj1426c).  
absent(strainClinical47939,cj1426c).  
absent(strainClinicalG1,cj1427c).  
absent(strainClinicalG3,cj1427c).  
absent(strainChickenicken11974,cj1427c).  
absent(strainChickenicken13249,cj1427c).  
absent(strainClinical58473,cj1427c).  
absent(strainClinical38556,cj1427c).  
absent(strainClinical39182,cj1427c).  
absent(strainClinical44933,cj1427c).  
absent(strainClinical45631,cj1427c).  
absent(strainClinical55320,cj1427c).  
absent(strainClinical41651,cj1427c).  
absent(strainClinical32799,cj1427c).  
absent(strainClinical44958,cj1427c).  
absent(strainClinical52331,cj1427c).  
absent(strainClinical56282,cj1427c).  
absent(strainClinical56832,cj1427c).  
absent(strainChickenicken12912,cj1427c).  
absent(strainChickenicken11818,cj1427c).  
absent(strainChicken12196,cj1427c).

absent(strainChickenicken13040,cj1427c).  
absent(strainChickenicken11856,cj1427c).  
absent(strainClinical36069,cj1427c).  
absent(strainChicken40209,cj1427c).  
absent(strainBeach1793,cj1427c).  
absent(strainClinical81116,cj1427c).  
absent(strainClinical36439,cj1427c).  
absent(strainClinical56519,cj1427c).  
absent(strainClinical32787,cj1427c).  
absent(strainClinical31467,cj1427c).  
absent(strainClinical44119,cj1427c).  
absent(strainClinical34007,cj1427c).  
absent(strainClinical38762,cj1427c).  
absent(strainClinicalclinical15168,cj1427c).  
absent(strainClinical18836,cj1427c).  
absent(strainClinicalM1,cj1427c).  
absent(strainClinical36860,cj1427c).  
absent(strainClinical40917,cj1427c).  
absent(strainClinical38857,cj1427c).  
absent(strainCjejuniRM1221,cj1427c).  
absent(strainChicken47693,cj1427c).  
absent(strainClinical63326,cj1427c).  
absent(strainClinical64555,cj1427c).  
absent(strainClinical59364,cj1427c).  
absent(strainClinical59424,cj1427c).  
absent(strainClinical31481,cj1427c).  
absent(strainClinical39828,cj1427c).  
absent(strainBeach1771,cj1427c).  
absent(strainClinical53250,cj1427c).  
absent(strainClinical45557,cj1427c).  
absent(strainClinical47939,cj1427c).  
absent(strainClinicalG1,cj1428c).  
absent(strainClinicalG3,cj1428c).  
absent(strainChickenicken11974,cj1428c).  
absent(strainChickenicken13249,cj1428c).  
absent(strainClinical58473,cj1428c).  
absent(strainClinical43205,cj1428c).  
absent(strainClinical33106,cj1428c).  
absent(strainClinical38556,cj1428c).  
absent(strainClinical39182,cj1428c).  
absent(strainClinical44933,cj1428c).  
absent(strainClinical45631,cj1428c).  
absent(strainClinical41651,cj1428c).  
absent(strainClinical32799,cj1428c).  
absent(strainClinical43983,cj1428c).  
absent(strainClinical40671,cj1428c).  
absent(strainClinical44958,cj1428c).  
absent(strainClinical52331,cj1428c).  
absent(strainClinical56281,cj1428c).  
absent(strainClinical56282,cj1428c).  
absent(strainClinical56832,cj1428c).  
absent(strainOvine12241,cj1428c).  
absent(strainOvine12481,cj1428c).  
absent(strainBovinevineine13305,cj1428c).

absent(strainChickenicken12912,cj1428c).  
absent(strainChickenicken11818,cj1428c).  
absent(strainChicken12196,cj1428c).  
absent(strainChickenicken13040,cj1428c).  
absent(strainChickenicken11856,cj1428c).  
absent(strainClinical36069,cj1428c).  
absent(strainChicken40209,cj1428c).  
absent(strainClinical36439,cj1428c).  
absent(strainClinical56519,cj1428c).  
absent(strainClinical32787,cj1428c).  
absent(strainClinicall31467,cj1428c).  
absent(strainClinical44119,cj1428c).  
absent(strainClinical34007,cj1428c).  
absent(strainClinical38762,cj1428c).  
absent(strainClinicalinical15168,cj1428c).  
absent(strainClinical18836,cj1428c).  
absent(strainClinicalM1,cj1428c).  
absent(strainClinical36860,cj1428c).  
absent(strainClinical38857,cj1428c).  
absent(strainCjejuniRM1221,cj1428c).  
absent(strainChicken47693,cj1428c).  
absent(strainClinical63326,cj1428c).  
absent(strainClinical64555,cj1428c).  
absent(strainClinical59364,cj1428c).  
absent(strainClinical59424,cj1428c).  
absent(strainClinical33084,cj1428c).  
absent(strainClinical31481,cj1428c).  
absent(strainClinical39828,cj1428c).  
absent(strainBeach1771,cj1428c).  
absent(strainClinical53250,cj1428c).  
absent(strainClinical45557,cj1428c).  
absent(strainClinical47939,cj1428c).  
absent(strainClinicalG1,cj1429c).  
absent(strainClinicalG3,cj1429c).  
absent(strainChickenicken11974,cj1429c).  
absent(strainChickenicken13249,cj1429c).  
absent(strainClinical58473,cj1429c).  
absent(strainClinical43205,cj1429c).  
absent(strainClinical33106,cj1429c).  
absent(strainClinicall38556,cj1429c).  
absent(strainClinicall39182,cj1429c).  
absent(strainClinical44933,cj1429c).  
absent(strainClinical45631,cj1429c).  
absent(strainClinical55320,cj1429c).  
absent(strainClinical41651,cj1429c).  
absent(strainClinical32799,cj1429c).  
absent(strainClinical43983,cj1429c).  
absent(strainClinical40671,cj1429c).  
absent(strainClinical44958,cj1429c).  
absent(strainClinical52331,cj1429c).  
absent(strainClinical56281,cj1429c).  
absent(strainClinical56282,cj1429c).  
absent(strainClinical56832,cj1429c).  
absent(strainOvine12241,cj1429c).



absent(strainOvine12481,cj1429c).  
absent(strainBovinevineine13305,cj1429c).  
absent(strainChickenicken12912,cj1429c).  
absent(strainChickenicken11818,cj1429c).  
absent(strainChicken12196,cj1429c).  
absent(strainChickenicken13040,cj1429c).  
absent(strainChickenicken11856,cj1429c).  
absent(strainClinical36069,cj1429c).  
absent(strainChicken40209,cj1429c).  
absent(strainClinical81116,cj1429c).  
absent(strainClinical36439,cj1429c).  
absent(strainClinical56519,cj1429c).  
absent(strainClinical32787,cj1429c).  
absent(strainClinical131467,cj1429c).  
absent(strainClinical44119,cj1429c).  
absent(strainClinical34007,cj1429c).  
absent(strainClinical38762,cj1429c).  
absent(strainClinicalclinical15168,cj1429c).  
absent(strainClinical18836,cj1429c).  
absent(strainClinicalM1,cj1429c).  
absent(strainClinical36860,cj1429c).  
absent(strainClinical40917,cj1429c).  
absent(strainCjejuniRM1221,cj1429c).  
absent(strainChicken47693,cj1429c).  
absent(strainClinical63326,cj1429c).  
absent(strainClinical64555,cj1429c).  
absent(strainClinical59364,cj1429c).  
absent(strainClinical59424,cj1429c).  
absent(strainClinical33084,cj1429c).  
absent(strainClinical31481,cj1429c).  
absent(strainClinical39828,cj1429c).  
absent(strainBeach1771,cj1429c).  
absent(strainClinical53250,cj1429c).  
absent(strainClinical45557,cj1429c).  
absent(strainClinical47939,cj1429c).  
absent(strainClinicalG1,cj1430c).  
absent(strainClinicalG3,cj1430c).  
absent(strainChickenicken11974,cj1430c).  
absent(strainChickenicken13249,cj1430c).  
absent(strainClinical58473,cj1430c).  
absent(strainClinical43205,cj1430c).  
absent(strainClinical33106,cj1430c).  
absent(strainClinical138556,cj1430c).  
absent(strainClinical139182,cj1430c).  
absent(strainClinical44933,cj1430c).  
absent(strainClinical45631,cj1430c).  
absent(strainClinical41651,cj1430c).  
absent(strainClinical32799,cj1430c).  
absent(strainClinical43983,cj1430c).  
absent(strainClinical40671,cj1430c).  
absent(strainClinical44958,cj1430c).  
absent(strainClinical52331,cj1430c).  
absent(strainClinical56281,cj1430c).  
absent(strainClinical56282,cj1430c).

absent(strainClinical56832,cj1430c).  
absent(strainOvine12241,cj1430c).  
absent(strainOvine12481,cj1430c).  
absent(strainBovinevineine13305,cj1430c).  
absent(strainChickenicken12912,cj1430c).  
absent(strainChickenicken11818,cj1430c).  
absent(strainChicken12196,cj1430c).  
absent(strainChickenicken13040,cj1430c).  
absent(strainChickenicken11856,cj1430c).  
absent(strainClinical36069,cj1430c).  
absent(strainChicken40209,cj1430c).  
absent(strainClinical81116,cj1430c).  
absent(strainClinical36439,cj1430c).  
absent(strainClinical56519,cj1430c).  
absent(strainClinical32787,cj1430c).  
absent(strainClinical31467,cj1430c).  
absent(strainClinical44119,cj1430c).  
absent(strainClinical34007,cj1430c).  
absent(strainClinical38762,cj1430c).  
absent(strainClinicalinical15168,cj1430c).  
absent(strainClinical18836,cj1430c).  
absent(strainClinicalM1,cj1430c).  
absent(strainClinical36860,cj1430c).  
absent(strainClinical40917,cj1430c).  
absent(strainClinical38857,cj1430c).  
absent(strainCjejuniRM1221,cj1430c).  
absent(strainChicken47693,cj1430c).  
absent(strainClinical63326,cj1430c).  
absent(strainClinical64555,cj1430c).  
absent(strainClinical59364,cj1430c).  
absent(strainClinical59424,cj1430c).  
absent(strainClinical33084,cj1430c).  
absent(strainClinical31481,cj1430c).  
absent(strainClinical39828,cj1430c).  
absent(strainBeach1771,cj1430c).  
absent(strainClinical53250,cj1430c).  
absent(strainClinical45557,cj1430c).  
absent(strainClinical47939,cj1430c).  
absent(strainClinicalG1,cj1431c).  
absent(strainClinicalG3,cj1431c).  
absent(strainChickenicken11974,cj1431c).  
absent(strainChickenicken13249,cj1431c).  
absent(strainClinical58473,cj1431c).  
absent(strainClinical43205,cj1431c).  
absent(strainClinical33106,cj1431c).  
absent(strainClinical38556,cj1431c).  
absent(strainClinical39182,cj1431c).  
absent(strainClinical44933,cj1431c).  
absent(strainClinical45631,cj1431c).  
absent(strainClinical55320,cj1431c).  
absent(strainClinical41651,cj1431c).  
absent(strainClinical32799,cj1431c).  
absent(strainClinical43983,cj1431c).  
absent(strainClinical40671,cj1431c).

absent(strainClinical44958,cj1431c).  
absent(strainClinical52331,cj1431c).  
absent(strainClinical56281,cj1431c).  
absent(strainClinical56282,cj1431c).  
absent(strainClinical56832,cj1431c).  
absent(strainOvine12241,cj1431c).  
absent(strainOvine12481,cj1431c).  
absent(strainBovinevineine13305,cj1431c).  
absent(strainChickenicken12912,cj1431c).  
absent(strainChickenicken11818,cj1431c).  
absent(strainChicken12196,cj1431c).  
absent(strainChickenicken13040,cj1431c).  
absent(strainChickenicken11856,cj1431c).  
absent(strainClinical36069,cj1431c).  
absent(strainBeach1793,cj1431c).  
absent(strainClinical81116,cj1431c).  
absent(strainClinical36439,cj1431c).  
absent(strainClinical56519,cj1431c).  
absent(strainClinical32787,cj1431c).  
absent(strainClinical31467,cj1431c).  
absent(strainClinical44119,cj1431c).  
absent(strainClinical34007,cj1431c).  
absent(strainClinical38762,cj1431c).  
absent(strainClinicalinical15168,cj1431c).  
absent(strainClinical18836,cj1431c).  
absent(strainClinicalM1,cj1431c).  
absent(strainClinical36860,cj1431c).  
absent(strainClinical40917,cj1431c).  
absent(strainClinical38857,cj1431c).  
absent(strainCjejuniRM1221,cj1431c).  
absent(strainChicken47693,cj1431c).  
absent(strainClinical63326,cj1431c).  
absent(strainClinical64555,cj1431c).  
absent(strainClinical59364,cj1431c).  
absent(strainClinical59424,cj1431c).  
absent(strainClinical33084,cj1431c).  
absent(strainClinical31481,cj1431c).  
absent(strainClinical39828,cj1431c).  
absent(strainBeach1771,cj1431c).  
absent(strainClinical53250,cj1431c).  
absent(strainClinical45557,cj1431c).  
absent(strainClinical47939,cj1431c).  
absent(strainClinicalG1,cj1432c).  
absent(strainClinicalG3,cj1432c).  
absent(strainChickenicken11974,cj1432c).  
absent(strainChickenicken13249,cj1432c).  
absent(strainClinical58473,cj1432c).  
absent(strainClinical43205,cj1432c).  
absent(strainClinical33106,cj1432c).  
absent(strainClinical38556,cj1432c).  
absent(strainClinical39182,cj1432c).  
absent(strainClinical44933,cj1432c).  
absent(strainClinical45631,cj1432c).  
absent(strainClinical41651,cj1432c).

absent(strainClinical32799,cj1432c).  
absent(strainClinical43983,cj1432c).  
absent(strainClinical44958,cj1432c).  
absent(strainClinical52331,cj1432c).  
absent(strainClinical56281,cj1432c).  
absent(strainClinical56282,cj1432c).  
absent(strainClinical56832,cj1432c).  
absent(strainOvine12241,cj1432c).  
absent(strainOvine12481,cj1432c).  
absent(strainBovinevineine13305,cj1432c).  
absent(strainChickenicken12912,cj1432c).  
absent(strainChickenicken11818,cj1432c).  
absent(strainChicken12196,cj1432c).  
absent(strainChickenicken13040,cj1432c).  
absent(strainChickenicken11856,cj1432c).  
absent(strainClinical36069,cj1432c).  
absent(strainChicken40209,cj1432c).  
absent(strainClinical36439,cj1432c).  
absent(strainClinical56519,cj1432c).  
absent(strainClinical32787,cj1432c).  
absent(strainClinical31467,cj1432c).  
absent(strainClinical44119,cj1432c).  
absent(strainClinical34007,cj1432c).  
absent(strainClinical38762,cj1432c).  
absent(strainClinicalinical15168,cj1432c).  
absent(strainClinical18836,cj1432c).  
absent(strainClinicalM1,cj1432c).  
absent(strainClinical36860,cj1432c).  
absent(strainClinical40917,cj1432c).  
absent(strainClinical38857,cj1432c).  
absent(strainCjejuniRM1221,cj1432c).  
absent(strainChicken47693,cj1432c).  
absent(strainClinical63326,cj1432c).  
absent(strainClinical64555,cj1432c).  
absent(strainClinical59364,cj1432c).  
absent(strainClinical59424,cj1432c).  
absent(strainClinical33084,cj1432c).  
absent(strainClinical31481,cj1432c).  
absent(strainClinical39828,cj1432c).  
absent(strainBeach1771,cj1432c).  
absent(strainClinical53250,cj1432c).  
absent(strainClinical45557,cj1432c).  
absent(strainClinical47939,cj1432c).  
absent(strainClinicalG1,cj1433c).  
absent(strainClinicalG3,cj1433c).  
absent(strainChickenicken11974,cj1433c).  
absent(strainChickenicken13249,cj1433c).  
absent(strainClinical58473,cj1433c).  
absent(strainClinical43205,cj1433c).  
absent(strainClinical33106,cj1433c).  
absent(strainClinical38556,cj1433c).  
absent(strainClinical39182,cj1433c).  
absent(strainClinical44933,cj1433c).  
absent(strainClinical45631,cj1433c).

absent(strainClinical41651,cj1433c).  
absent(strainClinical32799,cj1433c).  
absent(strainClinical44958,cj1433c).  
absent(strainClinical52331,cj1433c).  
absent(strainClinical56281,cj1433c).  
absent(strainClinical56282,cj1433c).  
absent(strainClinical56832,cj1433c).  
absent(strainOvine12241,cj1433c).  
absent(strainOvine12481,cj1433c).  
absent(strainBovinevineine13305,cj1433c).  
absent(strainChickenicken12912,cj1433c).  
absent(strainChickenicken11818,cj1433c).  
absent(strainChicken12196,cj1433c).  
absent(strainChickenicken13040,cj1433c).  
absent(strainChickenicken11856,cj1433c).  
absent(strainClinical36069,cj1433c).  
absent(strainChicken40209,cj1433c).  
absent(strainBeach1793,cj1433c).  
absent(strainClinical81116,cj1433c).  
absent(strainClinical36439,cj1433c).  
absent(strainClinical56519,cj1433c).  
absent(strainClinical32787,cj1433c).  
absent(strainClinicall31467,cj1433c).  
absent(strainClinical44119,cj1433c).  
absent(strainClinical34007,cj1433c).  
absent(strainClinical38762,cj1433c).  
absent(strainClinicalical15168,cj1433c).  
absent(strainClinical18836,cj1433c).  
absent(strainClinicalM1,cj1433c).  
absent(strainClinical36860,cj1433c).  
absent(strainClinical40917,cj1433c).  
absent(strainClinical38857,cj1433c).  
absent(strainCjejuniRM1221,cj1433c).  
absent(strainChicken47693,cj1433c).  
absent(strainClinical63326,cj1433c).  
absent(strainClinical64555,cj1433c).  
absent(strainClinical59364,cj1433c).  
absent(strainClinical59424,cj1433c).  
absent(strainClinical33084,cj1433c).  
absent(strainClinical31481,cj1433c).  
absent(strainClinical39828,cj1433c).  
absent(strainBeach1771,cj1433c).  
absent(strainClinical53250,cj1433c).  
absent(strainClinical45557,cj1433c).  
absent(strainClinical47939,cj1433c).  
absent(strainClinicalG1,cj1434c).  
absent(strainClinicalG3,cj1434c).  
absent(strainChickenicken13249,cj1434c).  
absent(strainClinical58473,cj1434c).  
absent(strainClinical43205,cj1434c).  
absent(strainClinical33106,cj1434c).  
absent(strainClinicall38556,cj1434c).  
absent(strainClinicall39182,cj1434c).  
absent(strainClinical44933,cj1434c).

absent(strainClinical45631,cj1434c).  
absent(strainClinical55320,cj1434c).  
absent(strainClinical41651,cj1434c).  
absent(strainClinical32799,cj1434c).  
absent(strainClinical43983,cj1434c).  
absent(strainClinical40671,cj1434c).  
absent(strainClinical44958,cj1434c).  
absent(strainClinical52331,cj1434c).  
absent(strainClinical56281,cj1434c).  
absent(strainClinical56282,cj1434c).  
absent(strainClinical56832,cj1434c).  
absent(strainOvine12241,cj1434c).  
absent(strainOvine12481,cj1434c).  
absent(strainBovinevineine13305,cj1434c).  
absent(strainChickenicken12912,cj1434c).  
absent(strainChickenicken11818,cj1434c).  
absent(strainChicken12196,cj1434c).  
absent(strainChickenicken13040,cj1434c).  
absent(strainChickenicken11856,cj1434c).  
absent(strainClinical36069,cj1434c).  
absent(strainChicken40209,cj1434c).  
absent(strainBeach1793,cj1434c).  
absent(strainClinical81116,cj1434c).  
absent(strainClinical36439,cj1434c).  
absent(strainClinical56519,cj1434c).  
absent(strainClinical32787,cj1434c).  
absent(strainClinicall31467,cj1434c).  
absent(strainClinical44119,cj1434c).  
absent(strainClinical34007,cj1434c).  
absent(strainClinical38762,cj1434c).  
absent(strainClinicalinical15168,cj1434c).  
absent(strainClinical18836,cj1434c).  
absent(strainClinicalM1,cj1434c).  
absent(strainClinical36860,cj1434c).  
absent(strainClinical40917,cj1434c).  
absent(strainClinical38857,cj1434c).  
absent(strainCjejuniRM1221,cj1434c).  
absent(strainChicken47693,cj1434c).  
absent(strainClinical63326,cj1434c).  
absent(strainClinical64555,cj1434c).  
absent(strainClinical59364,cj1434c).  
absent(strainClinical59424,cj1434c).  
absent(strainClinical33084,cj1434c).  
absent(strainClinical31481,cj1434c).  
absent(strainClinical39828,cj1434c).  
absent(strainBeach1771,cj1434c).  
absent(strainClinical53250,cj1434c).  
absent(strainClinical45557,cj1434c).  
absent(strainClinical47939,cj1434c).  
absent(strainClinicalG1,cj1435c).  
absent(strainClinicalG3,cj1435c).  
absent(strainChickenicken11974,cj1435c).  
absent(strainChickenicken13249,cj1435c).  
absent(strainClinical58473,cj1435c).

absent(strainClinical43205,cj1435c).  
absent(strainClinical33106,cj1435c).  
absent(strainClinical38556,cj1435c).  
absent(strainClinical39182,cj1435c).  
absent(strainClinical45631,cj1435c).  
absent(strainClinical55320,cj1435c).  
absent(strainClinical41651,cj1435c).  
absent(strainClinical32799,cj1435c).  
absent(strainClinical40671,cj1435c).  
absent(strainClinical44958,cj1435c).  
absent(strainClinical52331,cj1435c).  
absent(strainClinical56281,cj1435c).  
absent(strainClinical56282,cj1435c).  
absent(strainClinical56832,cj1435c).  
absent(strainOvine12241,cj1435c).  
absent(strainOvine12481,cj1435c).  
absent(strainBovinevineine13305,cj1435c).  
absent(strainChickenicken12912,cj1435c).  
absent(strainChickenicken11818,cj1435c).  
absent(strainChicken12196,cj1435c).  
absent(strainChickenicken13040,cj1435c).  
absent(strainChickenicken11856,cj1435c).  
absent(strainClinical36069,cj1435c).  
absent(strainChicken40209,cj1435c).  
absent(strainBeach1793,cj1435c).  
absent(strainClinical81116,cj1435c).  
absent(strainClinical56519,cj1435c).  
absent(strainClinical32787,cj1435c).  
absent(strainClinical31467,cj1435c).  
absent(strainClinical44119,cj1435c).  
absent(strainClinical34007,cj1435c).  
absent(strainClinical38762,cj1435c).  
absent(strainClinical18836,cj1435c).  
absent(strainClinicalM1,cj1435c).  
absent(strainClinical36860,cj1435c).  
absent(strainClinical40917,cj1435c).  
absent(strainClinical38857,cj1435c).  
absent(strainCjejuniRM1221,cj1435c).  
absent(strainChicken47693,cj1435c).  
absent(strainClinical63326,cj1435c).  
absent(strainClinical64555,cj1435c).  
absent(strainClinical59364,cj1435c).  
absent(strainClinical59424,cj1435c).  
absent(strainClinical33084,cj1435c).  
absent(strainClinical31481,cj1435c).  
absent(strainClinical39828,cj1435c).  
absent(strainBeach1771,cj1435c).  
absent(strainClinical53250,cj1435c).  
absent(strainClinical45557,cj1435c).  
absent(strainClinical47939,cj1435c).  
absent(strainClinicalG1,cj1436c).  
absent(strainClinicalG3,cj1436c).  
absent(strainChickenicken11974,cj1436c).  
absent(strainChickenicken13249,cj1436c).

absent(strainClinical58473,cj1436c).  
absent(strainClinical43205,cj1436c).  
absent(strainClinical33106,cj1436c).  
absent(strainClinical38556,cj1436c).  
absent(strainClinical39182,cj1436c).  
absent(strainClinical44933,cj1436c).  
absent(strainClinical45631,cj1436c).  
absent(strainClinical41651,cj1436c).  
absent(strainClinical32799,cj1436c).  
absent(strainClinical43983,cj1436c).  
absent(strainClinical40671,cj1436c).  
absent(strainClinical44958,cj1436c).  
absent(strainClinical52331,cj1436c).  
absent(strainClinical56281,cj1436c).  
absent(strainClinical56282,cj1436c).  
absent(strainClinical56832,cj1436c).  
absent(strainOvine12241,cj1436c).  
absent(strainOvine12481,cj1436c).  
absent(strainBovinevineine13305,cj1436c).  
absent(strainChickenicken12912,cj1436c).  
absent(strainChickenicken11818,cj1436c).  
absent(strainChicken12196,cj1436c).  
absent(strainChickenicken13040,cj1436c).  
absent(strainChickenicken11856,cj1436c).  
absent(strainClinical36069,cj1436c).  
absent(strainChicken40209,cj1436c).  
absent(strainClinical81116,cj1436c).  
absent(strainClinical36439,cj1436c).  
absent(strainClinical56519,cj1436c).  
absent(strainClinical32787,cj1436c).  
absent(strainClinical31467,cj1436c).  
absent(strainClinical44119,cj1436c).  
absent(strainClinical34007,cj1436c).  
absent(strainClinical38762,cj1436c).  
absent(strainClinicalical15168,cj1436c).  
absent(strainClinical18836,cj1436c).  
absent(strainClinicalM1,cj1436c).  
absent(strainClinical36860,cj1436c).  
absent(strainClinical40917,cj1436c).  
absent(strainCjejuniRM1221,cj1436c).  
absent(strainChicken47693,cj1436c).  
absent(strainClinical63326,cj1436c).  
absent(strainClinical64555,cj1436c).  
absent(strainClinical59364,cj1436c).  
absent(strainClinical59424,cj1436c).  
absent(strainClinical33084,cj1436c).  
absent(strainClinical31481,cj1436c).  
absent(strainClinical39828,cj1436c).  
absent(strainBeach1771,cj1436c).  
absent(strainClinical53250,cj1436c).  
absent(strainClinical45557,cj1436c).  
absent(strainClinical47939,cj1436c).  
absent(strainClinicalG1,cj1437c).  
absent(strainClinicalG3,cj1437c).



absent(strainChickenicken11974,cj1437c).  
absent(strainChickenicken13249,cj1437c).  
absent(strainClinical58473,cj1437c).  
absent(strainClinical43205,cj1437c).  
absent(strainClinical33106,cj1437c).  
absent(strainClinical138556,cj1437c).  
absent(strainClinical139182,cj1437c).  
absent(strainClinical44933,cj1437c).  
absent(strainClinical45631,cj1437c).  
absent(strainClinical55320,cj1437c).  
absent(strainClinical41651,cj1437c).  
absent(strainClinical32799,cj1437c).  
absent(strainClinical43983,cj1437c).  
absent(strainClinical40671,cj1437c).  
absent(strainClinical44958,cj1437c).  
absent(strainClinical52331,cj1437c).  
absent(strainClinical56281,cj1437c).  
absent(strainClinical56282,cj1437c).  
absent(strainClinical56832,cj1437c).  
absent(strainOvine12241,cj1437c).  
absent(strainOvine12481,cj1437c).  
absent(strainBovinevineine13305,cj1437c).  
absent(strainChickenicken12912,cj1437c).  
absent(strainChickenicken11818,cj1437c).  
absent(strainChicken12196,cj1437c).  
absent(strainChickenicken13040,cj1437c).  
absent(strainChickenicken11856,cj1437c).  
absent(strainClinical36069,cj1437c).  
absent(strainChicken40209,cj1437c).  
absent(strainBeach1793,cj1437c).  
absent(strainClinical81116,cj1437c).  
absent(strainClinical36439,cj1437c).  
absent(strainClinical56519,cj1437c).  
absent(strainClinical32787,cj1437c).  
absent(strainClinical131467,cj1437c).  
absent(strainClinical44119,cj1437c).  
absent(strainClinical34007,cj1437c).  
absent(strainClinical38762,cj1437c).  
absent(strainClinicalclinical15168,cj1437c).  
absent(strainClinical18836,cj1437c).  
absent(strainClinicalM1,cj1437c).  
absent(strainClinical36860,cj1437c).  
absent(strainClinical40917,cj1437c).  
absent(strainClinical38857,cj1437c).  
absent(strainCjejuniRM1221,cj1437c).  
absent(strainChicken47693,cj1437c).  
absent(strainClinical63326,cj1437c).  
absent(strainClinical64555,cj1437c).  
absent(strainClinical59364,cj1437c).  
absent(strainClinical59424,cj1437c).  
absent(strainClinical33084,cj1437c).  
absent(strainClinical31481,cj1437c).  
absent(strainClinical39828,cj1437c).  
absent(strainBeach1771,cj1437c).

absent(strainClinical53250,cj1437c).  
absent(strainClinical45557,cj1437c).  
absent(strainClinical47939,cj1437c).  
absent(strainClinicalG1,cj1438c).  
absent(strainClinicalG3,cj1438c).  
absent(strainChickenicken11974,cj1438c).  
absent(strainChickenicken13249,cj1438c).  
absent(strainClinical58473,cj1438c).  
absent(strainClinical43205,cj1438c).  
absent(strainClinical33106,cj1438c).  
absent(strainClinical138556,cj1438c).  
absent(strainClinical139182,cj1438c).  
absent(strainClinical44933,cj1438c).  
absent(strainClinical45631,cj1438c).  
absent(strainClinical55320,cj1438c).  
absent(strainClinical41651,cj1438c).  
absent(strainClinical32799,cj1438c).  
absent(strainClinical43983,cj1438c).  
absent(strainClinical40671,cj1438c).  
absent(strainClinical44958,cj1438c).  
absent(strainClinical52331,cj1438c).  
absent(strainClinical56281,cj1438c).  
absent(strainClinical56282,cj1438c).  
absent(strainClinical56832,cj1438c).  
absent(strainOvine12241,cj1438c).  
absent(strainOvine12481,cj1438c).  
absent(strainBovinevineine13305,cj1438c).  
absent(strainChickenicken12912,cj1438c).  
absent(strainChickenicken11818,cj1438c).  
absent(strainChicken12196,cj1438c).  
absent(strainChickenicken13040,cj1438c).  
absent(strainChickenicken11856,cj1438c).  
absent(strainClinical36069,cj1438c).  
absent(strainChicken40209,cj1438c).  
absent(strainBeach1793,cj1438c).  
absent(strainClinical81116,cj1438c).  
absent(strainClinical36439,cj1438c).  
absent(strainClinical56519,cj1438c).  
absent(strainClinical32787,cj1438c).  
absent(strainClinical131467,cj1438c).  
absent(strainClinical44119,cj1438c).  
absent(strainClinical34007,cj1438c).  
absent(strainClinical38762,cj1438c).  
absent(strainClinical15168,cj1438c).  
absent(strainClinical18836,cj1438c).  
absent(strainClinicalM1,cj1438c).  
absent(strainClinical36860,cj1438c).  
absent(strainClinical40917,cj1438c).  
absent(strainClinical38857,cj1438c).  
absent(strainCjejuniRM1221,cj1438c).  
absent(strainChicken47693,cj1438c).  
absent(strainClinical63326,cj1438c).  
absent(strainClinical64555,cj1438c).  
absent(strainClinical59364,cj1438c).

absent(strainClinical59424,cj1438c).  
absent(strainClinical33084,cj1438c).  
absent(strainClinical31481,cj1438c).  
absent(strainClinical39828,cj1438c).  
absent(strainBeach1771,cj1438c).  
absent(strainClinical53250,cj1438c).  
absent(strainClinical45557,cj1438c).  
absent(strainClinical47939,cj1438c).  
absent(strainClinicalG3,cj1439c).  
absent(strainChickenicken11974,cj1439c).  
absent(strainChickenicken13249,cj1439c).  
absent(strainClinical58473,cj1439c).  
absent(strainClinical43205,cj1439c).  
absent(strainClinical33106,cj1439c).  
absent(strainClinical138556,cj1439c).  
absent(strainClinical139182,cj1439c).  
absent(strainClinical44933,cj1439c).  
absent(strainClinical45631,cj1439c).  
absent(strainClinical55320,cj1439c).  
absent(strainClinical41651,cj1439c).  
absent(strainClinical32799,cj1439c).  
absent(strainClinical40671,cj1439c).  
absent(strainClinical52331,cj1439c).  
absent(strainClinical56281,cj1439c).  
absent(strainClinical56282,cj1439c).  
absent(strainClinical56832,cj1439c).  
absent(strainOvine12241,cj1439c).  
absent(strainOvine12481,cj1439c).  
absent(strainBovinevineine13305,cj1439c).  
absent(strainChickenicken12912,cj1439c).  
absent(strainChickenicken11818,cj1439c).  
absent(strainChicken12196,cj1439c).  
absent(strainChickenicken13040,cj1439c).  
absent(strainChickenicken11856,cj1439c).  
absent(strainClinical36069,cj1439c).  
absent(strainChicken40209,cj1439c).  
absent(strainBeach1793,cj1439c).  
absent(strainClinical811116,cj1439c).  
absent(strainClinical56519,cj1439c).  
absent(strainClinical32787,cj1439c).  
absent(strainClinical131467,cj1439c).  
absent(strainClinical44119,cj1439c).  
absent(strainClinical34007,cj1439c).  
absent(strainClinical38762,cj1439c).  
absent(strainClinical15168,cj1439c).  
absent(strainClinical18836,cj1439c).  
absent(strainClinicalM1,cj1439c).  
absent(strainClinical36860,cj1439c).  
absent(strainClinical40917,cj1439c).  
absent(strainClinical38857,cj1439c).  
absent(strainCjejuniRM1221,cj1439c).  
absent(strainChicken47693,cj1439c).  
absent(strainClinical63326,cj1439c).  
absent(strainClinical64555,cj1439c).

absent(strainClinical59364,cj1439c).  
absent(strainClinical59424,cj1439c).  
absent(strainClinical33084,cj1439c).  
absent(strainClinical31481,cj1439c).  
absent(strainClinical39828,cj1439c).  
absent(strainBeach1771,cj1439c).  
absent(strainClinical53250,cj1439c).  
absent(strainClinical45557,cj1439c).  
absent(strainClinical47939,cj1439c).  
absent(strainClinicalG1,cj1440c).  
absent(strainClinicalG3,cj1440c).  
absent(strainChickenicken11974,cj1440c).  
absent(strainChickenicken13249,cj1440c).  
absent(strainClinical58473,cj1440c).  
absent(strainClinical43205,cj1440c).  
absent(strainClinical33106,cj1440c).  
absent(strainClinical138556,cj1440c).  
absent(strainClinical139182,cj1440c).  
absent(strainClinical44933,cj1440c).  
absent(strainClinical45631,cj1440c).  
absent(strainClinical41651,cj1440c).  
absent(strainClinical32799,cj1440c).  
absent(strainClinical43983,cj1440c).  
absent(strainClinical40671,cj1440c).  
absent(strainClinical44958,cj1440c).  
absent(strainClinical52331,cj1440c).  
absent(strainClinical56282,cj1440c).  
absent(strainClinical56832,cj1440c).  
absent(strainOvine12241,cj1440c).  
absent(strainOvine12481,cj1440c).  
absent(strainBovinevineine13305,cj1440c).  
absent(strainChickenicken12912,cj1440c).  
absent(strainChickenicken11818,cj1440c).  
absent(strainChicken12196,cj1440c).  
absent(strainChickenicken13040,cj1440c).  
absent(strainChickenicken11856,cj1440c).  
absent(strainClinical36069,cj1440c).  
absent(strainChicken40209,cj1440c).  
absent(strainBeach1793,cj1440c).  
absent(strainClinical81116,cj1440c).  
absent(strainClinical36439,cj1440c).  
absent(strainClinical56519,cj1440c).  
absent(strainClinical32787,cj1440c).  
absent(strainClinical131467,cj1440c).  
absent(strainClinical44119,cj1440c).  
absent(strainClinical34007,cj1440c).  
absent(strainClinical38762,cj1440c).  
absent(strainClinicalinical15168,cj1440c).  
absent(strainClinical18836,cj1440c).  
absent(strainClinicalM1,cj1440c).  
absent(strainClinical36860,cj1440c).  
absent(strainClinical40917,cj1440c).  
absent(strainClinical38857,cj1440c).  
absent(strainCjejuniRM1221,cj1440c).

absent(strainChicken47693,cj1440c).  
absent(strainClinical63326,cj1440c).  
absent(strainClinical59364,cj1440c).  
absent(strainClinical59424,cj1440c).  
absent(strainClinical33084,cj1440c).  
absent(strainClinical31481,cj1440c).  
absent(strainClinical39828,cj1440c).  
absent(strainBeach1771,cj1440c).  
absent(strainClinical53250,cj1440c).  
absent(strainClinical45557,cj1440c).  
absent(strainClinical47939,cj1440c).  
absent(strainClinicalG1,cj1441c).  
absent(strainClinicalG3,cj1441c).  
absent(strainChickenicken11974,cj1441c).  
absent(strainChickenicken13249,cj1441c).  
absent(strainClinical58473,cj1441c).  
absent(strainClinical43205,cj1441c).  
absent(strainClinical33106,cj1441c).  
absent(strainClinical138556,cj1441c).  
absent(strainClinical139182,cj1441c).  
absent(strainClinical44933,cj1441c).  
absent(strainClinical45631,cj1441c).  
absent(strainClinical41651,cj1441c).  
absent(strainClinical32799,cj1441c).  
absent(strainClinical43983,cj1441c).  
absent(strainClinical40671,cj1441c).  
absent(strainClinical44958,cj1441c).  
absent(strainClinical52331,cj1441c).  
absent(strainClinical56282,cj1441c).  
absent(strainClinical56832,cj1441c).  
absent(strainOvine12241,cj1441c).  
absent(strainOvine12481,cj1441c).  
absent(strainBovinevineine13305,cj1441c).  
absent(strainChickenicken12912,cj1441c).  
absent(strainChickenicken11818,cj1441c).  
absent(strainChicken12196,cj1441c).  
absent(strainChickenicken13040,cj1441c).  
absent(strainChickenicken11856,cj1441c).  
absent(strainClinical36069,cj1441c).  
absent(strainChicken40209,cj1441c).  
absent(strainBeach1793,cj1441c).  
absent(strainClinical81116,cj1441c).  
absent(strainClinical36439,cj1441c).  
absent(strainClinical56519,cj1441c).  
absent(strainClinical32787,cj1441c).  
absent(strainClinical131467,cj1441c).  
absent(strainClinical44119,cj1441c).  
absent(strainClinical34007,cj1441c).  
absent(strainClinical38762,cj1441c).  
absent(strainClinical15168,cj1441c).  
absent(strainClinical18836,cj1441c).  
absent(strainClinicalM1,cj1441c).  
absent(strainClinical36860,cj1441c).  
absent(strainClinical40917,cj1441c).

absent(strainClinical38857,cj1441c).  
absent(strainCjejuniRM1221,cj1441c).  
absent(strainChicken47693,cj1441c).  
absent(strainClinical63326,cj1441c).  
absent(strainClinical64555,cj1441c).  
absent(strainClinical59364,cj1441c).  
absent(strainClinical59424,cj1441c).  
absent(strainClinical33084,cj1441c).  
absent(strainClinical31481,cj1441c).  
absent(strainClinical39828,cj1441c).  
absent(strainBeach1771,cj1441c).  
absent(strainClinical53250,cj1441c).  
absent(strainClinical45557,cj1441c).  
absent(strainClinical47939,cj1441c).  
absent(strainClinicalG1,cj1442c).  
absent(strainClinicalG3,cj1442c).  
absent(strainChickenicken11974,cj1442c).  
absent(strainChickenicken13249,cj1442c).  
absent(strainClinical33106,cj1442c).  
absent(strainClinical38556,cj1442c).  
absent(strainClinical39182,cj1442c).  
absent(strainClinical44933,cj1442c).  
absent(strainClinical45631,cj1442c).  
absent(strainClinical55320,cj1442c).  
absent(strainClinical32799,cj1442c).  
absent(strainClinical56832,cj1442c).  
absent(strainChickenicken12912,cj1442c).  
absent(strainClinical36069,cj1442c).  
absent(strainChicken40209,cj1442c).  
absent(strainBeach1793,cj1442c).  
absent(strainClinical81116,cj1442c).  
absent(strainClinical36439,cj1442c).  
absent(strainClinical32787,cj1442c).  
absent(strainClinical31467,cj1442c).  
absent(strainClinical44119,cj1442c).  
absent(strainClinical34007,cj1442c).  
absent(strainClinical38762,cj1442c).  
absent(strainClinical315168,cj1442c).  
absent(strainClinical18836,cj1442c).  
absent(strainClinicalM1,cj1442c).  
absent(strainClinical36860,cj1442c).  
absent(strainClinical40917,cj1442c).  
absent(strainClinical38857,cj1442c).  
absent(strainCjejuniRM1221,cj1442c).  
absent(strainClinical63326,cj1442c).  
absent(strainClinical64555,cj1442c).  
absent(strainClinical59364,cj1442c).  
absent(strainClinical59424,cj1442c).  
absent(strainClinical33084,cj1442c).  
absent(strainClinical31481,cj1442c).  
absent(strainClinical39828,cj1442c).  
absent(strainClinical45557,cj1442c).  
absent(strainClinical47939,cj1442c).  
absent(strainChickenicken12912,cj1443c).

absent(strainChickenicken11818,cj1443c).  
absent(strainClinical36439,cj1443c).  
absent(strainClinical32787,cj1443c).  
absent(strainClinical31467,cj1443c).  
absent(strainClinical38762,cj1443c).  
absent(strainCjejuniRM1221,cj1443c).  
absent(strainClinicalG3,cj1445c).  
absent(strainClinical32799,cj1445c).  
absent(strainChickenicken11818,cj1445c).  
absent(strainClinical39828,cj1445c).  
absent(strainClinicalG1,cj1447c).  
absent(strainClinicalG3,cj1447c).  
absent(strainChickenicken11974,cj1447c).  
absent(strainChickenicken13249,cj1447c).  
absent(strainClinical33106,cj1447c).  
absent(strainClinical38556,cj1447c).  
absent(strainClinical39182,cj1447c).  
absent(strainClinical44933,cj1447c).  
absent(strainClinical45631,cj1447c).  
absent(strainClinical55320,cj1447c).  
absent(strainClinical41651,cj1447c).  
absent(strainClinical32799,cj1447c).  
absent(strainClinical43983,cj1447c).  
absent(strainClinical40671,cj1447c).  
absent(strainClinical44958,cj1447c).  
absent(strainClinical52331,cj1447c).  
absent(strainClinical56281,cj1447c).  
absent(strainClinical56282,cj1447c).  
absent(strainClinical56832,cj1447c).  
absent(strainOvine12241,cj1447c).  
absent(strainOvine12481,cj1447c).  
absent(strainBovinevineine13305,cj1447c).  
absent(strainChickenicken11818,cj1447c).  
absent(strainChicken12196,cj1447c).  
absent(strainChickenicken13040,cj1447c).  
absent(strainChickenicken11856,cj1447c).  
absent(strainClinical36069,cj1447c).  
absent(strainBeach1793,cj1447c).  
absent(strainClinical36439,cj1447c).  
absent(strainClinical56519,cj1447c).  
absent(strainClinical32787,cj1447c).  
absent(strainClinical31467,cj1447c).  
absent(strainClinical44119,cj1447c).  
absent(strainClinical34007,cj1447c).  
absent(strainClinical38762,cj1447c).  
absent(strainClinicalinical15168,cj1447c).  
absent(strainClinical18836,cj1447c).  
absent(strainClinicalM1,cj1447c).  
absent(strainClinical36860,cj1447c).  
absent(strainClinical40917,cj1447c).  
absent(strainClinical38857,cj1447c).  
absent(strainChicken47693,cj1447c).  
absent(strainClinical63326,cj1447c).  
absent(strainClinical64555,cj1447c).

absent(strainClinical59364,cj1447c).  
absent(strainClinical59424,cj1447c).  
absent(strainClinical33084,cj1447c).  
absent(strainClinical31481,cj1447c).  
absent(strainClinical39828,cj1447c).  
absent(strainBeach1771,cj1447c).  
absent(strainClinical53250,cj1447c).  
absent(strainClinical45557,cj1447c).  
absent(strainClinical47939,cj1447c).  
absent(strainClinicalG1,cj1448c).  
absent(strainClinicalG3,cj1448c).  
absent(strainChickenicken11974,cj1448c).  
absent(strainChickenicken13249,cj1448c).  
absent(strainClinical33106,cj1448c).  
absent(strainClinical138556,cj1448c).  
absent(strainClinical139182,cj1448c).  
absent(strainClinical44933,cj1448c).  
absent(strainClinical45631,cj1448c).  
absent(strainClinical41651,cj1448c).  
absent(strainClinical32799,cj1448c).  
absent(strainClinical43983,cj1448c).  
absent(strainClinical40671,cj1448c).  
absent(strainClinical44958,cj1448c).  
absent(strainClinical52331,cj1448c).  
absent(strainClinical56281,cj1448c).  
absent(strainClinical56282,cj1448c).  
absent(strainClinical56832,cj1448c).  
absent(strainOvine12241,cj1448c).  
absent(strainOvine12481,cj1448c).  
absent(strainBovinevineine13305,cj1448c).  
absent(strainChickenicken11818,cj1448c).  
absent(strainChicken12196,cj1448c).  
absent(strainChickenicken13040,cj1448c).  
absent(strainChickenicken11856,cj1448c).  
absent(strainClinical36069,cj1448c).  
absent(strainClinical36439,cj1448c).  
absent(strainClinical56519,cj1448c).  
absent(strainClinical32787,cj1448c).  
absent(strainClinical131467,cj1448c).  
absent(strainClinical44119,cj1448c).  
absent(strainClinical34007,cj1448c).  
absent(strainClinical38762,cj1448c).  
absent(strainClinical15168,cj1448c).  
absent(strainClinical18836,cj1448c).  
absent(strainClinicalM1,cj1448c).  
absent(strainClinical40917,cj1448c).  
absent(strainClinical38857,cj1448c).  
absent(strainCjejuniRM1221,cj1448c).  
absent(strainChicken47693,cj1448c).  
absent(strainClinical63326,cj1448c).  
absent(strainClinical64555,cj1448c).  
absent(strainClinical59364,cj1448c).  
absent(strainClinical59424,cj1448c).  
absent(strainClinical33084,cj1448c).



absent(strainClinical31481,cj1448c).  
absent(strainClinical39828,cj1448c).  
absent(strainBeach1771,cj1448c).  
absent(strainClinical45557,cj1448c).  
absent(strainClinical47939,cj1448c).  
absent0(strainClinicalG3,cj1414c).  
absent0(strainClinical32799,cj1414c).  
absent0(strainClinical43983,cj1414c).  
absent0(strainBovinevineine13305,cj1414c).  
absent0(strainChickenicken11818,cj1414c).  
absent0(strainClinical81116,cj1414c).  
absent0(strainClinical36439,cj1414c).  
absent0(strainClinical32787,cj1414c).  
absent0(strainClinical131467,cj1414c).  
absent0(strainClinical38762,cj1414c).  
absent0(strainClinicalM1,cj1414c).  
absent0(strainClinical36860,cj1414c).  
absent0(strainClinical40917,cj1414c).  
absent0(strainClinical138556,cj1415c).  
absent0(strainClinical139182,cj1415c).  
absent0(strainClinical44933,cj1415c).  
absent0(strainClinical45631,cj1415c).  
absent0(strainClinical55320,cj1415c).  
absent0(strainClinical36069,cj1415c).  
absent0(strainClinical81116,cj1415c).  
absent0(strainClinical36439,cj1415c).  
absent0(strainClinical56519,cj1415c).  
absent0(strainClinical44119,cj1415c).  
absent0(strainClinical34007,cj1415c).  
absent0(strainClinicalM1,cj1415c).  
absent0(strainClinical36860,cj1415c).  
absent0(strainClinical40917,cj1415c).  
absent0(strainChicken47693,cj1415c).  
absent0(strainClinical63326,cj1415c).  
absent0(strainClinical64555,cj1415c).  
absent0(strainClinical59364,cj1415c).  
absent0(strainClinical59424,cj1415c).  
absent0(strainBeach1771,cj1415c).  
absent0(strainClinical53250,cj1415c).  
absent0(strainClinical47939,cj1415c).  
absent0(strainClinical138556,cj1416c).  
absent0(strainClinical139182,cj1416c).  
absent0(strainClinical44933,cj1416c).  
absent0(strainClinical45631,cj1416c).  
absent0(strainClinical36069,cj1416c).  
absent0(strainClinical36439,cj1416c).  
absent0(strainClinical44119,cj1416c).  
absent0(strainClinical34007,cj1416c).  
absent0(strainCjejuniRM1221,cj1416c).  
absent0(strainClinical63326,cj1416c).  
absent0(strainClinical64555,cj1416c).  
absent0(strainClinical59364,cj1416c).  
absent0(strainClinical59424,cj1416c).  
absent0(strainBeach1771,cj1416c).

absent0(strainClinical47939,cj1416c).  
absent0(strainClinical138556,cj1417c).  
absent0(strainClinical139182,cj1417c).  
absent0(strainClinical44933,cj1417c).  
absent0(strainClinical45631,cj1417c).  
absent0(strainClinical55320,cj1417c).  
absent0(strainClinical36069,cj1417c).  
absent0(strainClinical36439,cj1417c).  
absent0(strainClinical44119,cj1417c).  
absent0(strainClinical34007,cj1417c).  
absent0(strainCjejuniRM1221,cj1417c).  
absent0(strainClinical63326,cj1417c).  
absent0(strainClinical64555,cj1417c).  
absent0(strainClinical59364,cj1417c).  
absent0(strainClinical59424,cj1417c).  
absent0(strainBeach1771,cj1417c).  
absent0(strainClinical47939,cj1417c).  
absent0(strainClinical138556,cj1418c).  
absent0(strainClinical139182,cj1418c).  
absent0(strainClinical44933,cj1418c).  
absent0(strainClinical45631,cj1418c).  
absent0(strainClinical55320,cj1418c).  
absent0(strainClinical36069,cj1418c).  
absent0(strainClinical36439,cj1418c).  
absent0(strainClinical44119,cj1418c).  
absent0(strainClinical34007,cj1418c).  
absent0(strainCjejuniRM1221,cj1418c).  
absent0(strainClinical63326,cj1418c).  
absent0(strainClinical64555,cj1418c).  
absent0(strainClinical59364,cj1418c).  
absent0(strainClinical59424,cj1418c).  
absent0(strainBeach1771,cj1418c).  
absent0(strainClinical47939,cj1418c).  
absent0(strainClinical138556,cj1419c).  
absent0(strainClinical139182,cj1419c).  
absent0(strainClinical44933,cj1419c).  
absent0(strainClinical45631,cj1419c).  
absent0(strainClinical55320,cj1419c).  
absent0(strainClinical36069,cj1419c).  
absent0(strainClinical36439,cj1419c).  
absent0(strainClinical44119,cj1419c).  
absent0(strainClinical34007,cj1419c).  
absent0(strainCjejuniRM1221,cj1419c).  
absent0(strainClinical63326,cj1419c).  
absent0(strainClinical64555,cj1419c).  
absent0(strainClinical59364,cj1419c).  
absent0(strainClinical59424,cj1419c).  
absent0(strainBeach1771,cj1419c).  
absent0(strainClinical47939,cj1419c).  
absent0(strainClinicalG1,cj1421c).  
absent0(strainClinicalG3,cj1421c).  
absent0(strainChickenicken11974,cj1421c).  
absent0(strainChickenicken13249,cj1421c).  
absent0(strainClinical58473,cj1421c).

absent0(strainClinical43205,cj1421c).  
absent0(strainClinical33106,cj1421c).  
absent0(strainClinical138556,cj1421c).  
absent0(strainClinical139182,cj1421c).  
absent0(strainClinical44933,cj1421c).  
absent0(strainClinical45631,cj1421c).  
absent0(strainClinical55320,cj1421c).  
absent0(strainClinical41651,cj1421c).  
absent0(strainClinical32799,cj1421c).  
absent0(strainClinical43983,cj1421c).  
absent0(strainClinical40671,cj1421c).  
absent0(strainClinical44958,cj1421c).  
absent0(strainClinical52331,cj1421c).  
absent0(strainClinical56281,cj1421c).  
absent0(strainClinical56282,cj1421c).  
absent0(strainClinical56832,cj1421c).  
absent0(strainOvine12241,cj1421c).  
absent0(strainOvine12481,cj1421c).  
absent0(strainBovinevineine13305,cj1421c).  
absent0(strainChickenicken12912,cj1421c).  
absent0(strainChickenicken11818,cj1421c).  
absent0(strainChicken12196,cj1421c).  
absent0(strainChickenicken13040,cj1421c).  
absent0(strainChickenicken11856,cj1421c).  
absent0(strainClinical36069,cj1421c).  
absent0(strainChicken40209,cj1421c).  
absent0(strainBeach1793,cj1421c).  
absent0(strainClinical81116,cj1421c).  
absent0(strainClinical36439,cj1421c).  
absent0(strainClinical56519,cj1421c).  
absent0(strainClinical32787,cj1421c).  
absent0(strainClinical131467,cj1421c).  
absent0(strainClinical44119,cj1421c).  
absent0(strainClinical34007,cj1421c).  
absent0(strainClinical38762,cj1421c).  
absent0(strainClinicalinical15168,cj1421c).  
absent0(strainClinical18836,cj1421c).  
absent0(strainClinicalM1,cj1421c).  
absent0(strainClinical36860,cj1421c).  
absent0(strainClinical40917,cj1421c).  
absent0(strainClinical38857,cj1421c).  
absent0(strainChicken47693,cj1421c).  
absent0(strainClinical63326,cj1421c).  
absent0(strainClinical64555,cj1421c).  
absent0(strainClinical59364,cj1421c).  
absent0(strainClinical59424,cj1421c).  
absent0(strainClinical33084,cj1421c).  
absent0(strainClinical31481,cj1421c).  
absent0(strainClinical39828,cj1421c).  
absent0(strainBeach1771,cj1421c).  
absent0(strainClinical53250,cj1421c).  
absent0(strainClinical45557,cj1421c).  
absent0(strainClinical47939,cj1421c).  
absent0(strainClinicalG1,cj1422c).

absent0(strainClinicalG3,cj1422c).  
absent0(strainChickenicken11974,cj1422c).  
absent0(strainChickenicken13249,cj1422c).  
absent0(strainClinical58473,cj1422c).  
absent0(strainClinical43205,cj1422c).  
absent0(strainClinical33106,cj1422c).  
absent0(strainClinical138556,cj1422c).  
absent0(strainClinical139182,cj1422c).  
absent0(strainClinical44933,cj1422c).  
absent0(strainClinical45631,cj1422c).  
absent0(strainClinical41651,cj1422c).  
absent0(strainClinical32799,cj1422c).  
absent0(strainClinical43983,cj1422c).  
absent0(strainClinical40671,cj1422c).  
absent0(strainClinical44958,cj1422c).  
absent0(strainClinical52331,cj1422c).  
absent0(strainClinical56281,cj1422c).  
absent0(strainClinical56282,cj1422c).  
absent0(strainClinical56832,cj1422c).  
absent0(strainOvine12241,cj1422c).  
absent0(strainOvine12481,cj1422c).  
absent0(strainBovinevineine13305,cj1422c).  
absent0(strainChickenicken12912,cj1422c).  
absent0(strainChickenicken11818,cj1422c).  
absent0(strainChicken12196,cj1422c).  
absent0(strainChickenicken13040,cj1422c).  
absent0(strainChickenicken11856,cj1422c).  
absent0(strainClinical36069,cj1422c).  
absent0(strainChicken40209,cj1422c).  
absent0(strainBeach1793,cj1422c).  
absent0(strainClinical81116,cj1422c).  
absent0(strainClinical36439,cj1422c).  
absent0(strainClinical56519,cj1422c).  
absent0(strainClinical32787,cj1422c).  
absent0(strainClinical131467,cj1422c).  
absent0(strainClinical44119,cj1422c).  
absent0(strainClinical34007,cj1422c).  
absent0(strainClinical38762,cj1422c).  
absent0(strainClinicalinical15168,cj1422c).  
absent0(strainClinical18836,cj1422c).  
absent0(strainClinicalM1,cj1422c).  
absent0(strainClinical36860,cj1422c).  
absent0(strainClinical40917,cj1422c).  
absent0(strainClinical38857,cj1422c).  
absent0(strainCjejuniRM1221,cj1422c).  
absent0(strainChicken47693,cj1422c).  
absent0(strainClinical63326,cj1422c).  
absent0(strainClinical64555,cj1422c).  
absent0(strainClinical59364,cj1422c).  
absent0(strainClinical59424,cj1422c).  
absent0(strainClinical33084,cj1422c).  
absent0(strainClinical31481,cj1422c).  
absent0(strainBeach1771,cj1422c).  
absent0(strainClinical53250,cj1422c).

absent0(strainClinical45557,cj1422c).  
absent0(strainClinical47939,cj1422c).  
absent0(strainClinicalG1,cj1423c).  
absent0(strainClinicalG3,cj1423c).  
absent0(strainChickenicken11974,cj1423c).  
absent0(strainChickenicken13249,cj1423c).  
absent0(strainClinical58473,cj1423c).  
absent0(strainClinical33106,cj1423c).  
absent0(strainClinicall38556,cj1423c).  
absent0(strainClinicall39182,cj1423c).  
absent0(strainClinical44933,cj1423c).  
absent0(strainClinical45631,cj1423c).  
absent0(strainClinical32799,cj1423c).  
absent0(strainClinical43983,cj1423c).  
absent0(strainClinical40671,cj1423c).  
absent0(strainClinical52331,cj1423c).  
absent0(strainClinical56832,cj1423c).  
absent0(strainOvine12241,cj1423c).  
absent0(strainOvine12481,cj1423c).  
absent0(strainBovinevineine13305,cj1423c).  
absent0(strainChickenicken12912,cj1423c).  
absent0(strainChickenicken11818,cj1423c).  
absent0(strainChicken12196,cj1423c).  
absent0(strainChickenicken13040,cj1423c).  
absent0(strainChickenicken11856,cj1423c).  
absent0(strainClinical36069,cj1423c).  
absent0(strainChicken40209,cj1423c).  
absent0(strainClinical81116,cj1423c).  
absent0(strainClinical36439,cj1423c).  
absent0(strainClinical56519,cj1423c).  
absent0(strainClinical32787,cj1423c).  
absent0(strainClinicall31467,cj1423c).  
absent0(strainClinical44119,cj1423c).  
absent0(strainClinical34007,cj1423c).  
absent0(strainClinical38762,cj1423c).  
absent0(strainClinicalinical15168,cj1423c).  
absent0(strainClinical18836,cj1423c).  
absent0(strainClinicalM1,cj1423c).  
absent0(strainClinical36860,cj1423c).  
absent0(strainClinical40917,cj1423c).  
absent0(strainClinical38857,cj1423c).  
absent0(strainCjejuniRM1221,cj1423c).  
absent0(strainChicken47693,cj1423c).  
absent0(strainClinical63326,cj1423c).  
absent0(strainClinical64555,cj1423c).  
absent0(strainClinical59364,cj1423c).  
absent0(strainClinical59424,cj1423c).  
absent0(strainClinical31481,cj1423c).  
absent0(strainClinical39828,cj1423c).  
absent0(strainBeach1771,cj1423c).  
absent0(strainClinical45557,cj1423c).  
absent0(strainClinical47939,cj1423c).  
absent0(strainClinicalG1,cj1424c).  
absent0(strainClinicalG3,cj1424c).

absent0(strainChickenicken11974,cj1424c).  
absent0(strainChickenicken13249,cj1424c).  
absent0(strainClinical58473,cj1424c).  
absent0(strainClinical33106,cj1424c).  
absent0(strainClinical44933,cj1424c).  
absent0(strainClinical32799,cj1424c).  
absent0(strainClinical44958,cj1424c).  
absent0(strainClinical52331,cj1424c).  
absent0(strainClinical56281,cj1424c).  
absent0(strainClinical56832,cj1424c).  
absent0(strainChickenicken12912,cj1424c).  
absent0(strainChickenicken11818,cj1424c).  
absent0(strainChicken12196,cj1424c).  
absent0(strainChickenicken13040,cj1424c).  
absent0(strainChicken40209,cj1424c).  
absent0(strainBeach1793,cj1424c).  
absent0(strainClinical36439,cj1424c).  
absent0(strainClinical56519,cj1424c).  
absent0(strainClinicalical15168,cj1424c).  
absent0(strainClinical18836,cj1424c).  
absent0(strainClinicalM1,cj1424c).  
absent0(strainClinical36860,cj1424c).  
absent0(strainClinical40917,cj1424c).  
absent0(strainCjejuniRM1221,cj1424c).  
absent0(strainClinical39828,cj1424c).  
absent0(strainClinical45557,cj1424c).  
absent0(strainClinical47939,cj1424c).  
absent0(strainClinicalG1,cj1425c).  
absent0(strainClinicalG3,cj1425c).  
absent0(strainChickenicken11974,cj1425c).  
absent0(strainChickenicken13249,cj1425c).  
absent0(strainClinicall38556,cj1425c).  
absent0(strainClinicall39182,cj1425c).  
absent0(strainClinical45631,cj1425c).  
absent0(strainClinical32799,cj1425c).  
absent0(strainClinical52331,cj1425c).  
absent0(strainOvine12481,cj1425c).  
absent0(strainBovinevineine13305,cj1425c).  
absent0(strainChickenicken12912,cj1425c).  
absent0(strainChickenicken11818,cj1425c).  
absent0(strainClinical36069,cj1425c).  
absent0(strainChicken40209,cj1425c).  
absent0(strainClinical36439,cj1425c).  
absent0(strainClinical32787,cj1425c).  
absent0(strainClinical44119,cj1425c).  
absent0(strainClinical34007,cj1425c).  
absent0(strainClinical38762,cj1425c).  
absent0(strainClinicalical15168,cj1425c).  
absent0(strainClinical18836,cj1425c).  
absent0(strainClinicalM1,cj1425c).  
absent0(strainClinical36860,cj1425c).  
absent0(strainClinical40917,cj1425c).  
absent0(strainCjejuniRM1221,cj1425c).  
absent0(strainClinical63326,cj1425c).

absent0(strainClinical59364,cj1425c).  
absent0(strainClinical59424,cj1425c).  
absent0(strainClinical33084,cj1425c).  
absent0(strainClinical39828,cj1425c).  
absent0(strainClinical45557,cj1425c).  
absent0(strainClinical47939,cj1425c).  
absent0(strainClinicalG1,cj1426c).  
absent0(strainClinicalG3,cj1426c).  
absent0(strainChickenicken11974,cj1426c).  
absent0(strainChickenicken13249,cj1426c).  
absent0(strainClinical58473,cj1426c).  
absent0(strainClinical43205,cj1426c).  
absent0(strainClinical33106,cj1426c).  
absent0(strainClinical138556,cj1426c).  
absent0(strainClinical139182,cj1426c).  
absent0(strainClinical44933,cj1426c).  
absent0(strainClinical45631,cj1426c).  
absent0(strainClinical41651,cj1426c).  
absent0(strainClinical32799,cj1426c).  
absent0(strainClinical43983,cj1426c).  
absent0(strainClinical40671,cj1426c).  
absent0(strainClinical44958,cj1426c).  
absent0(strainClinical52331,cj1426c).  
absent0(strainClinical56281,cj1426c).  
absent0(strainClinical56282,cj1426c).  
absent0(strainClinical56832,cj1426c).  
absent0(strainOvine12241,cj1426c).  
absent0(strainOvine12481,cj1426c).  
absent0(strainBovinevineine13305,cj1426c).  
absent0(strainChickenicken12912,cj1426c).  
absent0(strainChickenicken11818,cj1426c).  
absent0(strainChicken12196,cj1426c).  
absent0(strainChickenicken13040,cj1426c).  
absent0(strainChickenicken11856,cj1426c).  
absent0(strainClinical36069,cj1426c).  
absent0(strainChicken40209,cj1426c).  
absent0(strainBeach1793,cj1426c).  
absent0(strainClinical81116,cj1426c).  
absent0(strainClinical36439,cj1426c).  
absent0(strainClinical56519,cj1426c).  
absent0(strainClinical32787,cj1426c).  
absent0(strainClinical131467,cj1426c).  
absent0(strainClinical44119,cj1426c).  
absent0(strainClinical34007,cj1426c).  
absent0(strainClinical38762,cj1426c).  
absent0(strainClinicalclinical15168,cj1426c).  
absent0(strainClinical18836,cj1426c).  
absent0(strainClinicalM1,cj1426c).  
absent0(strainClinical36860,cj1426c).  
absent0(strainClinical40917,cj1426c).  
absent0(strainClinical38857,cj1426c).  
absent0(strainChicken47693,cj1426c).  
absent0(strainClinical63326,cj1426c).  
absent0(strainClinical64555,cj1426c).

absent0(strainClinical59364,cj1426c).  
absent0(strainClinical59424,cj1426c).  
absent0(strainClinical33084,cj1426c).  
absent0(strainClinical31481,cj1426c).  
absent0(strainClinical39828,cj1426c).  
absent0(strainBeach1771,cj1426c).  
absent0(strainClinical53250,cj1426c).  
absent0(strainClinical45557,cj1426c).  
absent0(strainClinical47939,cj1426c).  
absent0(strainClinicalG1,cj1427c).  
absent0(strainClinicalG3,cj1427c).  
absent0(strainChickenicken11974,cj1427c).  
absent0(strainChickenicken13249,cj1427c).  
absent0(strainClinical58473,cj1427c).  
absent0(strainClinical138556,cj1427c).  
absent0(strainClinical139182,cj1427c).  
absent0(strainClinical44933,cj1427c).  
absent0(strainClinical45631,cj1427c).  
absent0(strainClinical55320,cj1427c).  
absent0(strainClinical41651,cj1427c).  
absent0(strainClinical32799,cj1427c).  
absent0(strainClinical44958,cj1427c).  
absent0(strainClinical52331,cj1427c).  
absent0(strainClinical56282,cj1427c).  
absent0(strainClinical56832,cj1427c).  
absent0(strainChickenicken12912,cj1427c).  
absent0(strainChickenicken11818,cj1427c).  
absent0(strainChicken12196,cj1427c).  
absent0(strainChickenicken13040,cj1427c).  
absent0(strainChickenicken11856,cj1427c).  
absent0(strainClinical36069,cj1427c).  
absent0(strainChicken40209,cj1427c).  
absent0(strainBeach1793,cj1427c).  
absent0(strainClinical81116,cj1427c).  
absent0(strainClinical36439,cj1427c).  
absent0(strainClinical56519,cj1427c).  
absent0(strainClinical32787,cj1427c).  
absent0(strainClinical131467,cj1427c).  
absent0(strainClinical44119,cj1427c).  
absent0(strainClinical34007,cj1427c).  
absent0(strainClinical38762,cj1427c).  
absent0(strainClinical15168,cj1427c).  
absent0(strainClinical18836,cj1427c).  
absent0(strainClinicalM1,cj1427c).  
absent0(strainClinical36860,cj1427c).  
absent0(strainClinical40917,cj1427c).  
absent0(strainClinical38857,cj1427c).  
absent0(strainCjejuniRM1221,cj1427c).  
absent0(strainChicken47693,cj1427c).  
absent0(strainClinical63326,cj1427c).  
absent0(strainClinical64555,cj1427c).  
absent0(strainClinical59364,cj1427c).  
absent0(strainClinical59424,cj1427c).  
absent0(strainClinical31481,cj1427c).



absent0(strainClinical39828,cj1427c).  
absent0(strainBeach1771,cj1427c).  
absent0(strainClinical53250,cj1427c).  
absent0(strainClinical45557,cj1427c).  
absent0(strainClinical47939,cj1427c).  
absent0(strainClinicalG1,cj1428c).  
absent0(strainClinicalG3,cj1428c).  
absent0(strainChickenicken11974,cj1428c).  
absent0(strainChickenicken13249,cj1428c).  
absent0(strainClinical58473,cj1428c).  
absent0(strainClinical43205,cj1428c).  
absent0(strainClinical33106,cj1428c).  
absent0(strainClinicall38556,cj1428c).  
absent0(strainClinicall39182,cj1428c).  
absent0(strainClinical44933,cj1428c).  
absent0(strainClinical45631,cj1428c).  
absent0(strainClinical41651,cj1428c).  
absent0(strainClinical32799,cj1428c).  
absent0(strainClinical43983,cj1428c).  
absent0(strainClinical40671,cj1428c).  
absent0(strainClinical44958,cj1428c).  
absent0(strainClinical52331,cj1428c).  
absent0(strainClinical56281,cj1428c).  
absent0(strainClinical56282,cj1428c).  
absent0(strainClinical56832,cj1428c).  
absent0(strainOvine12241,cj1428c).  
absent0(strainOvine12481,cj1428c).  
absent0(strainBovinevineine13305,cj1428c).  
absent0(strainChickenicken12912,cj1428c).  
absent0(strainChickenicken11818,cj1428c).  
absent0(strainChicken12196,cj1428c).  
absent0(strainChickenicken13040,cj1428c).  
absent0(strainChickenicken11856,cj1428c).  
absent0(strainClinical36069,cj1428c).  
absent0(strainChicken40209,cj1428c).  
absent0(strainClinical36439,cj1428c).  
absent0(strainClinical56519,cj1428c).  
absent0(strainClinical32787,cj1428c).  
absent0(strainClinicall31467,cj1428c).  
absent0(strainClinical44119,cj1428c).  
absent0(strainClinical34007,cj1428c).  
absent0(strainClinical38762,cj1428c).  
absent0(strainClinicalinical15168,cj1428c).  
absent0(strainClinical18836,cj1428c).  
absent0(strainClinicalM1,cj1428c).  
absent0(strainClinical36860,cj1428c).  
absent0(strainClinical38857,cj1428c).  
absent0(strainCjejuniRM1221,cj1428c).  
absent0(strainChicken47693,cj1428c).  
absent0(strainClinical63326,cj1428c).  
absent0(strainClinical64555,cj1428c).  
absent0(strainClinical59364,cj1428c).  
absent0(strainClinical59424,cj1428c).  
absent0(strainClinical33084,cj1428c).

absent0(strainClinical31481,cj1428c).  
absent0(strainClinical39828,cj1428c).  
absent0(strainBeach1771,cj1428c).  
absent0(strainClinical53250,cj1428c).  
absent0(strainClinical45557,cj1428c).  
absent0(strainClinical47939,cj1428c).  
absent0(strainClinicalG1,cj1429c).  
absent0(strainClinicalG3,cj1429c).  
absent0(strainChickenicken11974,cj1429c).  
absent0(strainChickenicken13249,cj1429c).  
absent0(strainClinical58473,cj1429c).  
absent0(strainClinical43205,cj1429c).  
absent0(strainClinical33106,cj1429c).  
absent0(strainClinical138556,cj1429c).  
absent0(strainClinical139182,cj1429c).  
absent0(strainClinical44933,cj1429c).  
absent0(strainClinical45631,cj1429c).  
absent0(strainClinical55320,cj1429c).  
absent0(strainClinical41651,cj1429c).  
absent0(strainClinical32799,cj1429c).  
absent0(strainClinical43983,cj1429c).  
absent0(strainClinical40671,cj1429c).  
absent0(strainClinical44958,cj1429c).  
absent0(strainClinical52331,cj1429c).  
absent0(strainClinical56281,cj1429c).  
absent0(strainClinical56282,cj1429c).  
absent0(strainClinical56832,cj1429c).  
absent0(strainOvine12241,cj1429c).  
absent0(strainOvine12481,cj1429c).  
absent0(strainBovinevineine13305,cj1429c).  
absent0(strainChickenicken12912,cj1429c).  
absent0(strainChickenicken11818,cj1429c).  
absent0(strainChicken12196,cj1429c).  
absent0(strainChickenicken13040,cj1429c).  
absent0(strainChickenicken11856,cj1429c).  
absent0(strainClinical36069,cj1429c).  
absent0(strainChicken40209,cj1429c).  
absent0(strainClinical81116,cj1429c).  
absent0(strainClinical36439,cj1429c).  
absent0(strainClinical56519,cj1429c).  
absent0(strainClinical32787,cj1429c).  
absent0(strainClinical131467,cj1429c).  
absent0(strainClinical44119,cj1429c).  
absent0(strainClinical34007,cj1429c).  
absent0(strainClinical38762,cj1429c).  
absent0(strainClinicalclinical15168,cj1429c).  
absent0(strainClinical18836,cj1429c).  
absent0(strainClinicalM1,cj1429c).  
absent0(strainClinical36860,cj1429c).  
absent0(strainClinical40917,cj1429c).  
absent0(strainCjejuniRM1221,cj1429c).  
absent0(strainChicken47693,cj1429c).  
absent0(strainClinical63326,cj1429c).  
absent0(strainClinical64555,cj1429c).

absent0(strainClinical59364,cj1429c).  
absent0(strainClinical59424,cj1429c).  
absent0(strainClinical33084,cj1429c).  
absent0(strainClinical31481,cj1429c).  
absent0(strainClinical39828,cj1429c).  
absent0(strainBeach1771,cj1429c).  
absent0(strainClinical53250,cj1429c).  
absent0(strainClinical45557,cj1429c).  
absent0(strainClinical47939,cj1429c).  
absent0(strainClinicalG1,cj1430c).  
absent0(strainClinicalG3,cj1430c).  
absent0(strainChickenicken11974,cj1430c).  
absent0(strainChickenicken13249,cj1430c).  
absent0(strainClinical58473,cj1430c).  
absent0(strainClinical43205,cj1430c).  
absent0(strainClinical33106,cj1430c).  
absent0(strainClinicall38556,cj1430c).  
absent0(strainClinicall39182,cj1430c).  
absent0(strainClinical44933,cj1430c).  
absent0(strainClinical45631,cj1430c).  
absent0(strainClinical41651,cj1430c).  
absent0(strainClinical32799,cj1430c).  
absent0(strainClinical43983,cj1430c).  
absent0(strainClinical40671,cj1430c).  
absent0(strainClinical44958,cj1430c).  
absent0(strainClinical52331,cj1430c).  
absent0(strainClinical56281,cj1430c).  
absent0(strainClinical56282,cj1430c).  
absent0(strainClinical56832,cj1430c).  
absent0(strainOvine12241,cj1430c).  
absent0(strainOvine12481,cj1430c).  
absent0(strainBovinevineine13305,cj1430c).  
absent0(strainChickenicken12912,cj1430c).  
absent0(strainChickenicken11818,cj1430c).  
absent0(strainChicken12196,cj1430c).  
absent0(strainChickenicken13040,cj1430c).  
absent0(strainChickenicken11856,cj1430c).  
absent0(strainClinical36069,cj1430c).  
absent0(strainChicken40209,cj1430c).  
absent0(strainClinical81116,cj1430c).  
absent0(strainClinical36439,cj1430c).  
absent0(strainClinical56519,cj1430c).  
absent0(strainClinical32787,cj1430c).  
absent0(strainClinicall31467,cj1430c).  
absent0(strainClinical44119,cj1430c).  
absent0(strainClinical34007,cj1430c).  
absent0(strainClinical38762,cj1430c).  
absent0(strainClinicalinical15168,cj1430c).  
absent0(strainClinical18836,cj1430c).  
absent0(strainClinicalM1,cj1430c).  
absent0(strainClinical36860,cj1430c).  
absent0(strainClinical40917,cj1430c).  
absent0(strainClinical38857,cj1430c).  
absent0(strainCjejuniRM1221,cj1430c).

absent0(strainChicken47693,cj1430c).  
absent0(strainClinical63326,cj1430c).  
absent0(strainClinical64555,cj1430c).  
absent0(strainClinical59364,cj1430c).  
absent0(strainClinical59424,cj1430c).  
absent0(strainClinical33084,cj1430c).  
absent0(strainClinical31481,cj1430c).  
absent0(strainClinical39828,cj1430c).  
absent0(strainBeach1771,cj1430c).  
absent0(strainClinical53250,cj1430c).  
absent0(strainClinical45557,cj1430c).  
absent0(strainClinical47939,cj1430c).  
absent0(strainClinicalG1,cj1431c).  
absent0(strainClinicalG3,cj1431c).  
absent0(strainChickenicken11974,cj1431c).  
absent0(strainChickenicken13249,cj1431c).  
absent0(strainClinical58473,cj1431c).  
absent0(strainClinical43205,cj1431c).  
absent0(strainClinical33106,cj1431c).  
absent0(strainClinicall38556,cj1431c).  
absent0(strainClinicall39182,cj1431c).  
absent0(strainClinical44933,cj1431c).  
absent0(strainClinical45631,cj1431c).  
absent0(strainClinical55320,cj1431c).  
absent0(strainClinical41651,cj1431c).  
absent0(strainClinical32799,cj1431c).  
absent0(strainClinical43983,cj1431c).  
absent0(strainClinical40671,cj1431c).  
absent0(strainClinical44958,cj1431c).  
absent0(strainClinical52331,cj1431c).  
absent0(strainClinical56281,cj1431c).  
absent0(strainClinical56282,cj1431c).  
absent0(strainClinical56832,cj1431c).  
absent0(strainOvine12241,cj1431c).  
absent0(strainOvine12481,cj1431c).  
absent0(strainBovinevineine13305,cj1431c).  
absent0(strainChickenicken12912,cj1431c).  
absent0(strainChickenicken11818,cj1431c).  
absent0(strainChicken12196,cj1431c).  
absent0(strainChickenicken13040,cj1431c).  
absent0(strainChickenicken11856,cj1431c).  
absent0(strainClinical36069,cj1431c).  
absent0(strainBeach1793,cj1431c).  
absent0(strainClinical81116,cj1431c).  
absent0(strainClinical36439,cj1431c).  
absent0(strainClinical56519,cj1431c).  
absent0(strainClinical32787,cj1431c).  
absent0(strainClinicall31467,cj1431c).  
absent0(strainClinical44119,cj1431c).  
absent0(strainClinical34007,cj1431c).  
absent0(strainClinical38762,cj1431c).  
absent0(strainClinicalinical15168,cj1431c).  
absent0(strainClinical18836,cj1431c).  
absent0(strainClinicalM1,cj1431c).

absent0(strainClinical36860,cj1431c).  
absent0(strainClinical40917,cj1431c).  
absent0(strainClinical38857,cj1431c).  
absent0(strainCjejuniRM1221,cj1431c).  
absent0(strainChicken47693,cj1431c).  
absent0(strainClinical63326,cj1431c).  
absent0(strainClinical64555,cj1431c).  
absent0(strainClinical59364,cj1431c).  
absent0(strainClinical59424,cj1431c).  
absent0(strainClinical33084,cj1431c).  
absent0(strainClinical31481,cj1431c).  
absent0(strainClinical39828,cj1431c).  
absent0(strainBeach1771,cj1431c).  
absent0(strainClinical53250,cj1431c).  
absent0(strainClinical45557,cj1431c).  
absent0(strainClinical47939,cj1431c).  
absent0(strainClinicalG1,cj1432c).  
absent0(strainClinicalG3,cj1432c).  
absent0(strainChickenicken11974,cj1432c).  
absent0(strainChickenicken13249,cj1432c).  
absent0(strainClinical58473,cj1432c).  
absent0(strainClinical43205,cj1432c).  
absent0(strainClinical33106,cj1432c).  
absent0(strainClinicall38556,cj1432c).  
absent0(strainClinicall39182,cj1432c).  
absent0(strainClinical44933,cj1432c).  
absent0(strainClinical45631,cj1432c).  
absent0(strainClinical41651,cj1432c).  
absent0(strainClinical32799,cj1432c).  
absent0(strainClinical43983,cj1432c).  
absent0(strainClinical44958,cj1432c).  
absent0(strainClinical52331,cj1432c).  
absent0(strainClinical56281,cj1432c).  
absent0(strainClinical56282,cj1432c).  
absent0(strainClinical56832,cj1432c).  
absent0(strainOvine12241,cj1432c).  
absent0(strainOvine12481,cj1432c).  
absent0(strainBovinevineine13305,cj1432c).  
absent0(strainChickenicken12912,cj1432c).  
absent0(strainChickenicken11818,cj1432c).  
absent0(strainChicken12196,cj1432c).  
absent0(strainChickenicken13040,cj1432c).  
absent0(strainChickenicken11856,cj1432c).  
absent0(strainClinical36069,cj1432c).  
absent0(strainChicken40209,cj1432c).  
absent0(strainClinical36439,cj1432c).  
absent0(strainClinical56519,cj1432c).  
absent0(strainClinical32787,cj1432c).  
absent0(strainClinicall31467,cj1432c).  
absent0(strainClinical44119,cj1432c).  
absent0(strainClinical34007,cj1432c).  
absent0(strainClinical38762,cj1432c).  
absent0(strainClinicalical15168,cj1432c).  
absent0(strainClinical18836,cj1432c).

absent0(strainClinicalM1,cj1432c).  
absent0(strainClinical36860,cj1432c).  
absent0(strainClinical40917,cj1432c).  
absent0(strainClinical38857,cj1432c).  
absent0(strainCjejuniRM1221,cj1432c).  
absent0(strainChicken47693,cj1432c).  
absent0(strainClinical63326,cj1432c).  
absent0(strainClinical64555,cj1432c).  
absent0(strainClinical59364,cj1432c).  
absent0(strainClinical59424,cj1432c).  
absent0(strainClinical33084,cj1432c).  
absent0(strainClinical31481,cj1432c).  
absent0(strainClinical39828,cj1432c).  
absent0(strainBeach1771,cj1432c).  
absent0(strainClinical53250,cj1432c).  
absent0(strainClinical45557,cj1432c).  
absent0(strainClinical47939,cj1432c).  
absent0(strainClinicalG1,cj1433c).  
absent0(strainClinicalG3,cj1433c).  
absent0(strainChickenicken11974,cj1433c).  
absent0(strainChickenicken13249,cj1433c).  
absent0(strainClinical58473,cj1433c).  
absent0(strainClinical43205,cj1433c).  
absent0(strainClinical33106,cj1433c).  
absent0(strainClinicall38556,cj1433c).  
absent0(strainClinicall39182,cj1433c).  
absent0(strainClinical44933,cj1433c).  
absent0(strainClinical45631,cj1433c).  
absent0(strainClinical41651,cj1433c).  
absent0(strainClinical32799,cj1433c).  
absent0(strainClinical44958,cj1433c).  
absent0(strainClinical52331,cj1433c).  
absent0(strainClinical56281,cj1433c).  
absent0(strainClinical56282,cj1433c).  
absent0(strainClinical56832,cj1433c).  
absent0(strainOvine12241,cj1433c).  
absent0(strainOvine12481,cj1433c).  
absent0(strainBovinevineine13305,cj1433c).  
absent0(strainChickenicken12912,cj1433c).  
absent0(strainChickenicken11818,cj1433c).  
absent0(strainChicken12196,cj1433c).  
absent0(strainChickenicken13040,cj1433c).  
absent0(strainChickenicken11856,cj1433c).  
absent0(strainClinical36069,cj1433c).  
absent0(strainChicken40209,cj1433c).  
absent0(strainBeach1793,cj1433c).  
absent0(strainClinical81116,cj1433c).  
absent0(strainClinical36439,cj1433c).  
absent0(strainClinical56519,cj1433c).  
absent0(strainClinical32787,cj1433c).  
absent0(strainClinicall31467,cj1433c).  
absent0(strainClinical44119,cj1433c).  
absent0(strainClinical34007,cj1433c).  
absent0(strainClinical38762,cj1433c).

absent0(strainClinical15168,cj1433c).  
absent0(strainClinical18836,cj1433c).  
absent0(strainClinicalM1,cj1433c).  
absent0(strainClinical36860,cj1433c).  
absent0(strainClinical40917,cj1433c).  
absent0(strainClinical38857,cj1433c).  
absent0(strainCjejuniRM1221,cj1433c).  
absent0(strainChicken47693,cj1433c).  
absent0(strainClinical63326,cj1433c).  
absent0(strainClinical64555,cj1433c).  
absent0(strainClinical59364,cj1433c).  
absent0(strainClinical59424,cj1433c).  
absent0(strainClinical33084,cj1433c).  
absent0(strainClinical31481,cj1433c).  
absent0(strainClinical39828,cj1433c).  
absent0(strainBeach1771,cj1433c).  
absent0(strainClinical53250,cj1433c).  
absent0(strainClinical45557,cj1433c).  
absent0(strainClinical47939,cj1433c).  
absent0(strainClinicalG1,cj1434c).  
absent0(strainClinicalG3,cj1434c).  
absent0(strainChickenicken13249,cj1434c).  
absent0(strainClinical58473,cj1434c).  
absent0(strainClinical43205,cj1434c).  
absent0(strainClinical33106,cj1434c).  
absent0(strainClinical138556,cj1434c).  
absent0(strainClinical139182,cj1434c).  
absent0(strainClinical44933,cj1434c).  
absent0(strainClinical45631,cj1434c).  
absent0(strainClinical55320,cj1434c).  
absent0(strainClinical41651,cj1434c).  
absent0(strainClinical32799,cj1434c).  
absent0(strainClinical43983,cj1434c).  
absent0(strainClinical40671,cj1434c).  
absent0(strainClinical44958,cj1434c).  
absent0(strainClinical52331,cj1434c).  
absent0(strainClinical56281,cj1434c).  
absent0(strainClinical56282,cj1434c).  
absent0(strainClinical56832,cj1434c).  
absent0(strainOvine12241,cj1434c).  
absent0(strainOvine12481,cj1434c).  
absent0(strainBovinevineine13305,cj1434c).  
absent0(strainChickenicken12912,cj1434c).  
absent0(strainChickenicken11818,cj1434c).  
absent0(strainChicken12196,cj1434c).  
absent0(strainChickenicken13040,cj1434c).  
absent0(strainChickenicken11856,cj1434c).  
absent0(strainClinical36069,cj1434c).  
absent0(strainChicken40209,cj1434c).  
absent0(strainBeach1793,cj1434c).  
absent0(strainClinical81116,cj1434c).  
absent0(strainClinical36439,cj1434c).  
absent0(strainClinical56519,cj1434c).  
absent0(strainClinical32787,cj1434c).

absent0(strainClinicall31467,cj1434c).  
absent0(strainClinical44119,cj1434c).  
absent0(strainClinical34007,cj1434c).  
absent0(strainClinical38762,cj1434c).  
absent0(strainClinicalclinical15168,cj1434c).  
absent0(strainClinical18836,cj1434c).  
absent0(strainClinicalM1,cj1434c).  
absent0(strainClinical36860,cj1434c).  
absent0(strainClinical40917,cj1434c).  
absent0(strainClinical38857,cj1434c).  
absent0(strainCjejuniRM1221,cj1434c).  
absent0(strainChicken47693,cj1434c).  
absent0(strainClinical63326,cj1434c).  
absent0(strainClinical64555,cj1434c).  
absent0(strainClinical59364,cj1434c).  
absent0(strainClinical59424,cj1434c).  
absent0(strainClinical33084,cj1434c).  
absent0(strainClinical31481,cj1434c).  
absent0(strainClinical39828,cj1434c).  
absent0(strainBeach1771,cj1434c).  
absent0(strainClinical53250,cj1434c).  
absent0(strainClinical45557,cj1434c).  
absent0(strainClinical47939,cj1434c).  
absent0(strainClinicalG1,cj1435c).  
absent0(strainClinicalG3,cj1435c).  
absent0(strainChickenicken11974,cj1435c).  
absent0(strainChickenicken13249,cj1435c).  
absent0(strainClinical58473,cj1435c).  
absent0(strainClinical43205,cj1435c).  
absent0(strainClinical33106,cj1435c).  
absent0(strainClinicall38556,cj1435c).  
absent0(strainClinicall39182,cj1435c).  
absent0(strainClinical45631,cj1435c).  
absent0(strainClinical55320,cj1435c).  
absent0(strainClinical41651,cj1435c).  
absent0(strainClinical32799,cj1435c).  
absent0(strainClinical40671,cj1435c).  
absent0(strainClinical44958,cj1435c).  
absent0(strainClinical52331,cj1435c).  
absent0(strainClinical56281,cj1435c).  
absent0(strainClinical56282,cj1435c).  
absent0(strainClinical56832,cj1435c).  
absent0(strainOvine12241,cj1435c).  
absent0(strainOvine12481,cj1435c).  
absent0(strainBovinevineine13305,cj1435c).  
absent0(strainChickenicken12912,cj1435c).  
absent0(strainChickenicken11818,cj1435c).  
absent0(strainChicken12196,cj1435c).  
absent0(strainChickenicken13040,cj1435c).  
absent0(strainChickenicken11856,cj1435c).  
absent0(strainClinical36069,cj1435c).  
absent0(strainChicken40209,cj1435c).  
absent0(strainBeach1793,cj1435c).  
absent0(strainClinical81116,cj1435c).



absent0(strainClinical56519,cj1435c).  
absent0(strainClinical32787,cj1435c).  
absent0(strainClinical131467,cj1435c).  
absent0(strainClinical44119,cj1435c).  
absent0(strainClinical34007,cj1435c).  
absent0(strainClinical38762,cj1435c).  
absent0(strainClinical18836,cj1435c).  
absent0(strainClinicalM1,cj1435c).  
absent0(strainClinical36860,cj1435c).  
absent0(strainClinical40917,cj1435c).  
absent0(strainClinical38857,cj1435c).  
absent0(strainCjejuniRM1221,cj1435c).  
absent0(strainChicken47693,cj1435c).  
absent0(strainClinical63326,cj1435c).  
absent0(strainClinical64555,cj1435c).  
absent0(strainClinical59364,cj1435c).  
absent0(strainClinical59424,cj1435c).  
absent0(strainClinical33084,cj1435c).  
absent0(strainClinical31481,cj1435c).  
absent0(strainClinical39828,cj1435c).  
absent0(strainBeach1771,cj1435c).  
absent0(strainClinical53250,cj1435c).  
absent0(strainClinical45557,cj1435c).  
absent0(strainClinical47939,cj1435c).  
absent0(strainClinicalG1,cj1436c).  
absent0(strainClinicalG3,cj1436c).  
absent0(strainChickenicken11974,cj1436c).  
absent0(strainChickenicken13249,cj1436c).  
absent0(strainClinical58473,cj1436c).  
absent0(strainClinical43205,cj1436c).  
absent0(strainClinical33106,cj1436c).  
absent0(strainClinical138556,cj1436c).  
absent0(strainClinical139182,cj1436c).  
absent0(strainClinical44933,cj1436c).  
absent0(strainClinical45631,cj1436c).  
absent0(strainClinical41651,cj1436c).  
absent0(strainClinical32799,cj1436c).  
absent0(strainClinical43983,cj1436c).  
absent0(strainClinical40671,cj1436c).  
absent0(strainClinical44958,cj1436c).  
absent0(strainClinical52331,cj1436c).  
absent0(strainClinical56281,cj1436c).  
absent0(strainClinical56282,cj1436c).  
absent0(strainClinical56832,cj1436c).  
absent0(strainOvine12241,cj1436c).  
absent0(strainOvine12481,cj1436c).  
absent0(strainBovinevineine13305,cj1436c).  
absent0(strainChickenicken12912,cj1436c).  
absent0(strainChickenicken11818,cj1436c).  
absent0(strainChicken12196,cj1436c).  
absent0(strainChickenicken13040,cj1436c).  
absent0(strainChickenicken11856,cj1436c).  
absent0(strainClinical36069,cj1436c).  
absent0(strainChicken40209,cj1436c).

absent0(strainClinical81116,cj1436c).  
absent0(strainClinical36439,cj1436c).  
absent0(strainClinical56519,cj1436c).  
absent0(strainClinical32787,cj1436c).  
absent0(strainClinical31467,cj1436c).  
absent0(strainClinical44119,cj1436c).  
absent0(strainClinical34007,cj1436c).  
absent0(strainClinical38762,cj1436c).  
absent0(strainClinical15168,cj1436c).  
absent0(strainClinical18836,cj1436c).  
absent0(strainClinicalM1,cj1436c).  
absent0(strainClinical36860,cj1436c).  
absent0(strainClinical40917,cj1436c).  
absent0(strainCjejuniRM1221,cj1436c).  
absent0(strainChicken47693,cj1436c).  
absent0(strainClinical63326,cj1436c).  
absent0(strainClinical64555,cj1436c).  
absent0(strainClinical59364,cj1436c).  
absent0(strainClinical59424,cj1436c).  
absent0(strainClinical33084,cj1436c).  
absent0(strainClinical31481,cj1436c).  
absent0(strainClinical39828,cj1436c).  
absent0(strainBeach1771,cj1436c).  
absent0(strainClinical53250,cj1436c).  
absent0(strainClinical45557,cj1436c).  
absent0(strainClinical47939,cj1436c).  
absent0(strainClinicalG1,cj1437c).  
absent0(strainClinicalG3,cj1437c).  
absent0(strainChickenicken11974,cj1437c).  
absent0(strainChickenicken13249,cj1437c).  
absent0(strainClinical58473,cj1437c).  
absent0(strainClinical43205,cj1437c).  
absent0(strainClinical33106,cj1437c).  
absent0(strainClinical138556,cj1437c).  
absent0(strainClinical139182,cj1437c).  
absent0(strainClinical44933,cj1437c).  
absent0(strainClinical45631,cj1437c).  
absent0(strainClinical55320,cj1437c).  
absent0(strainClinical41651,cj1437c).  
absent0(strainClinical32799,cj1437c).  
absent0(strainClinical43983,cj1437c).  
absent0(strainClinical40671,cj1437c).  
absent0(strainClinical44958,cj1437c).  
absent0(strainClinical52331,cj1437c).  
absent0(strainClinical56281,cj1437c).  
absent0(strainClinical56282,cj1437c).  
absent0(strainClinical56832,cj1437c).  
absent0(strainOvine12241,cj1437c).  
absent0(strainOvine12481,cj1437c).  
absent0(strainBovinevineine13305,cj1437c).  
absent0(strainChickenicken12912,cj1437c).  
absent0(strainChickenicken11818,cj1437c).  
absent0(strainChicken12196,cj1437c).  
absent0(strainChickenicken13040,cj1437c).

absent0(strainChickenicken11856,cj1437c).  
absent0(strainClinical36069,cj1437c).  
absent0(strainChicken40209,cj1437c).  
absent0(strainBeach1793,cj1437c).  
absent0(strainClinical81116,cj1437c).  
absent0(strainClinical36439,cj1437c).  
absent0(strainClinical56519,cj1437c).  
absent0(strainClinical32787,cj1437c).  
absent0(strainClinicall31467,cj1437c).  
absent0(strainClinical44119,cj1437c).  
absent0(strainClinical34007,cj1437c).  
absent0(strainClinical38762,cj1437c).  
absent0(strainClinicalclinical15168,cj1437c).  
absent0(strainClinical18836,cj1437c).  
absent0(strainClinicalM1,cj1437c).  
absent0(strainClinical36860,cj1437c).  
absent0(strainClinical40917,cj1437c).  
absent0(strainClinical38857,cj1437c).  
absent0(strainCjejuniRM1221,cj1437c).  
absent0(strainChicken47693,cj1437c).  
absent0(strainClinical63326,cj1437c).  
absent0(strainClinical64555,cj1437c).  
absent0(strainClinical59364,cj1437c).  
absent0(strainClinical59424,cj1437c).  
absent0(strainClinical33084,cj1437c).  
absent0(strainClinical31481,cj1437c).  
absent0(strainClinical39828,cj1437c).  
absent0(strainBeach1771,cj1437c).  
absent0(strainClinical53250,cj1437c).  
absent0(strainClinical45557,cj1437c).  
absent0(strainClinical47939,cj1437c).  
absent0(strainClinicalG1,cj1438c).  
absent0(strainClinicalG3,cj1438c).  
absent0(strainChickenicken11974,cj1438c).  
absent0(strainChickenicken13249,cj1438c).  
absent0(strainClinical58473,cj1438c).  
absent0(strainClinical43205,cj1438c).  
absent0(strainClinical33106,cj1438c).  
absent0(strainClinicall38556,cj1438c).  
absent0(strainClinicall39182,cj1438c).  
absent0(strainClinical44933,cj1438c).  
absent0(strainClinical45631,cj1438c).  
absent0(strainClinical55320,cj1438c).  
absent0(strainClinical41651,cj1438c).  
absent0(strainClinical32799,cj1438c).  
absent0(strainClinical43983,cj1438c).  
absent0(strainClinical40671,cj1438c).  
absent0(strainClinical44958,cj1438c).  
absent0(strainClinical52331,cj1438c).  
absent0(strainClinical56281,cj1438c).  
absent0(strainClinical56282,cj1438c).  
absent0(strainClinical56832,cj1438c).  
absent0(strainOvine12241,cj1438c).  
absent0(strainOvine12481,cj1438c).

absent0(strainBovinevineine13305,cj1438c).  
absent0(strainChickenicken12912,cj1438c).  
absent0(strainChickenicken11818,cj1438c).  
absent0(strainChicken12196,cj1438c).  
absent0(strainChickenicken13040,cj1438c).  
absent0(strainChickenicken11856,cj1438c).  
absent0(strainClinical36069,cj1438c).  
absent0(strainChicken40209,cj1438c).  
absent0(strainBeach1793,cj1438c).  
absent0(strainClinical81116,cj1438c).  
absent0(strainClinical36439,cj1438c).  
absent0(strainClinical56519,cj1438c).  
absent0(strainClinical32787,cj1438c).  
absent0(strainClinicall31467,cj1438c).  
absent0(strainClinical44119,cj1438c).  
absent0(strainClinical34007,cj1438c).  
absent0(strainClinical38762,cj1438c).  
absent0(strainClinicalinical15168,cj1438c).  
absent0(strainClinical18836,cj1438c).  
absent0(strainClinicalM1,cj1438c).  
absent0(strainClinical36860,cj1438c).  
absent0(strainClinical40917,cj1438c).  
absent0(strainClinical38857,cj1438c).  
absent0(strainCjejuniRM1221,cj1438c).  
absent0(strainChicken47693,cj1438c).  
absent0(strainClinical63326,cj1438c).  
absent0(strainClinical64555,cj1438c).  
absent0(strainClinical59364,cj1438c).  
absent0(strainClinical59424,cj1438c).  
absent0(strainClinical33084,cj1438c).  
absent0(strainClinical31481,cj1438c).  
absent0(strainClinical39828,cj1438c).  
absent0(strainBeach1771,cj1438c).  
absent0(strainClinical53250,cj1438c).  
absent0(strainClinical45557,cj1438c).  
absent0(strainClinical47939,cj1438c).  
absent0(strainClinicalG3,cj1439c).  
absent0(strainChickenicken11974,cj1439c).  
absent0(strainChickenicken13249,cj1439c).  
absent0(strainClinical58473,cj1439c).  
absent0(strainClinical43205,cj1439c).  
absent0(strainClinical33106,cj1439c).  
absent0(strainClinicall38556,cj1439c).  
absent0(strainClinicall39182,cj1439c).  
absent0(strainClinical44933,cj1439c).  
absent0(strainClinical45631,cj1439c).  
absent0(strainClinical55320,cj1439c).  
absent0(strainClinical41651,cj1439c).  
absent0(strainClinical32799,cj1439c).  
absent0(strainClinical40671,cj1439c).  
absent0(strainClinical52331,cj1439c).  
absent0(strainClinical56281,cj1439c).  
absent0(strainClinical56282,cj1439c).  
absent0(strainClinical56832,cj1439c).

absent0(strainOvine12241,cj1439c).  
absent0(strainOvine12481,cj1439c).  
absent0(strainBovinevineine13305,cj1439c).  
absent0(strainChickenicken12912,cj1439c).  
absent0(strainChickenicken11818,cj1439c).  
absent0(strainChicken12196,cj1439c).  
absent0(strainChickenicken13040,cj1439c).  
absent0(strainChickenicken11856,cj1439c).  
absent0(strainClinical36069,cj1439c).  
absent0(strainChicken40209,cj1439c).  
absent0(strainBeach1793,cj1439c).  
absent0(strainClinical81116,cj1439c).  
absent0(strainClinical56519,cj1439c).  
absent0(strainClinical32787,cj1439c).  
absent0(strainClinicall31467,cj1439c).  
absent0(strainClinical44119,cj1439c).  
absent0(strainClinical34007,cj1439c).  
absent0(strainClinical38762,cj1439c).  
absent0(strainClinicalical15168,cj1439c).  
absent0(strainClinical18836,cj1439c).  
absent0(strainClinicalM1,cj1439c).  
absent0(strainClinical36860,cj1439c).  
absent0(strainClinical40917,cj1439c).  
absent0(strainClinical38857,cj1439c).  
absent0(strainCjejuniRM1221,cj1439c).  
absent0(strainChicken47693,cj1439c).  
absent0(strainClinical63326,cj1439c).  
absent0(strainClinical64555,cj1439c).  
absent0(strainClinical59364,cj1439c).  
absent0(strainClinical59424,cj1439c).  
absent0(strainClinical33084,cj1439c).  
absent0(strainClinical31481,cj1439c).  
absent0(strainClinical39828,cj1439c).  
absent0(strainBeach1771,cj1439c).  
absent0(strainClinical53250,cj1439c).  
absent0(strainClinical45557,cj1439c).  
absent0(strainClinical47939,cj1439c).  
absent0(strainClinicalG1,cj1440c).  
absent0(strainClinicalG3,cj1440c).  
absent0(strainChickenicken11974,cj1440c).  
absent0(strainChickenicken13249,cj1440c).  
absent0(strainClinical58473,cj1440c).  
absent0(strainClinical43205,cj1440c).  
absent0(strainClinical33106,cj1440c).  
absent0(strainClinicall38556,cj1440c).  
absent0(strainClinicall39182,cj1440c).  
absent0(strainClinical44933,cj1440c).  
absent0(strainClinical45631,cj1440c).  
absent0(strainClinical41651,cj1440c).  
absent0(strainClinical32799,cj1440c).  
absent0(strainClinical43983,cj1440c).  
absent0(strainClinical40671,cj1440c).  
absent0(strainClinical44958,cj1440c).  
absent0(strainClinical52331,cj1440c).

absent0(strainClinical56282,cj1440c).  
absent0(strainClinical56832,cj1440c).  
absent0(strainOvine12241,cj1440c).  
absent0(strainOvine12481,cj1440c).  
absent0(strainBovinevineine13305,cj1440c).  
absent0(strainChickenicken12912,cj1440c).  
absent0(strainChickenicken11818,cj1440c).  
absent0(strainChicken12196,cj1440c).  
absent0(strainChickenicken13040,cj1440c).  
absent0(strainChickenicken11856,cj1440c).  
absent0(strainClinical36069,cj1440c).  
absent0(strainChicken40209,cj1440c).  
absent0(strainBeach1793,cj1440c).  
absent0(strainClinical81116,cj1440c).  
absent0(strainClinical36439,cj1440c).  
absent0(strainClinical56519,cj1440c).  
absent0(strainClinical32787,cj1440c).  
absent0(strainClinicall31467,cj1440c).  
absent0(strainClinical44119,cj1440c).  
absent0(strainClinical34007,cj1440c).  
absent0(strainClinical38762,cj1440c).  
absent0(strainClinicalinical15168,cj1440c).  
absent0(strainClinical18836,cj1440c).  
absent0(strainClinicalM1,cj1440c).  
absent0(strainClinical36860,cj1440c).  
absent0(strainClinical40917,cj1440c).  
absent0(strainClinical38857,cj1440c).  
absent0(strainCjejuniRM1221,cj1440c).  
absent0(strainChicken47693,cj1440c).  
absent0(strainClinical63326,cj1440c).  
absent0(strainClinical59364,cj1440c).  
absent0(strainClinical59424,cj1440c).  
absent0(strainClinical33084,cj1440c).  
absent0(strainClinical31481,cj1440c).  
absent0(strainClinical39828,cj1440c).  
absent0(strainBeach1771,cj1440c).  
absent0(strainClinical53250,cj1440c).  
absent0(strainClinical45557,cj1440c).  
absent0(strainClinical47939,cj1440c).  
absent0(strainClinicalG1,cj1441c).  
absent0(strainClinicalG3,cj1441c).  
absent0(strainChickenicken11974,cj1441c).  
absent0(strainChickenicken13249,cj1441c).  
absent0(strainClinical58473,cj1441c).  
absent0(strainClinical43205,cj1441c).  
absent0(strainClinical33106,cj1441c).  
absent0(strainClinicall38556,cj1441c).  
absent0(strainClinicall39182,cj1441c).  
absent0(strainClinical44933,cj1441c).  
absent0(strainClinical45631,cj1441c).  
absent0(strainClinical41651,cj1441c).  
absent0(strainClinical32799,cj1441c).  
absent0(strainClinical43983,cj1441c).  
absent0(strainClinical40671,cj1441c).

absent0(strainClinical44958,cj1441c).  
absent0(strainClinical52331,cj1441c).  
absent0(strainClinical56282,cj1441c).  
absent0(strainClinical56832,cj1441c).  
absent0(strainOvine12241,cj1441c).  
absent0(strainOvine12481,cj1441c).  
absent0(strainBovinevineine13305,cj1441c).  
absent0(strainChickenicken12912,cj1441c).  
absent0(strainChickenicken11818,cj1441c).  
absent0(strainChicken12196,cj1441c).  
absent0(strainChickenicken13040,cj1441c).  
absent0(strainChickenicken11856,cj1441c).  
absent0(strainClinical36069,cj1441c).  
absent0(strainChicken40209,cj1441c).  
absent0(strainBeach1793,cj1441c).  
absent0(strainClinical81116,cj1441c).  
absent0(strainClinical36439,cj1441c).  
absent0(strainClinical56519,cj1441c).  
absent0(strainClinical32787,cj1441c).  
absent0(strainClinical31467,cj1441c).  
absent0(strainClinical44119,cj1441c).  
absent0(strainClinical34007,cj1441c).  
absent0(strainClinical38762,cj1441c).  
absent0(strainClinicalinical15168,cj1441c).  
absent0(strainClinical18836,cj1441c).  
absent0(strainClinicalM1,cj1441c).  
absent0(strainClinical36860,cj1441c).  
absent0(strainClinical40917,cj1441c).  
absent0(strainClinical38857,cj1441c).  
absent0(strainCjejuniRM1221,cj1441c).  
absent0(strainChicken47693,cj1441c).  
absent0(strainClinical63326,cj1441c).  
absent0(strainClinical64555,cj1441c).  
absent0(strainClinical59364,cj1441c).  
absent0(strainClinical59424,cj1441c).  
absent0(strainClinical33084,cj1441c).  
absent0(strainClinical31481,cj1441c).  
absent0(strainClinical39828,cj1441c).  
absent0(strainBeach1771,cj1441c).  
absent0(strainClinical53250,cj1441c).  
absent0(strainClinical45557,cj1441c).  
absent0(strainClinical47939,cj1441c).  
absent0(strainClinicalG1,cj1442c).  
absent0(strainClinicalG3,cj1442c).  
absent0(strainChickenicken11974,cj1442c).  
absent0(strainChickenicken13249,cj1442c).  
absent0(strainClinical33106,cj1442c).  
absent0(strainClinical38556,cj1442c).  
absent0(strainClinical39182,cj1442c).  
absent0(strainClinical44933,cj1442c).  
absent0(strainClinical45631,cj1442c).  
absent0(strainClinical55320,cj1442c).  
absent0(strainClinical32799,cj1442c).  
absent0(strainClinical56832,cj1442c).

absent0(strainChickenicken12912,cj1442c).  
absent0(strainClinical36069,cj1442c).  
absent0(strainChicken40209,cj1442c).  
absent0(strainBeach1793,cj1442c).  
absent0(strainClinical81116,cj1442c).  
absent0(strainClinical36439,cj1442c).  
absent0(strainClinical32787,cj1442c).  
absent0(strainClinical31467,cj1442c).  
absent0(strainClinical44119,cj1442c).  
absent0(strainClinical34007,cj1442c).  
absent0(strainClinical38762,cj1442c).  
absent0(strainClinicalclinical15168,cj1442c).  
absent0(strainClinical18836,cj1442c).  
absent0(strainClinicalM1,cj1442c).  
absent0(strainClinical36860,cj1442c).  
absent0(strainClinical40917,cj1442c).  
absent0(strainClinical38857,cj1442c).  
absent0(strainCjejuniRM1221,cj1442c).  
absent0(strainClinical63326,cj1442c).  
absent0(strainClinical64555,cj1442c).  
absent0(strainClinical59364,cj1442c).  
absent0(strainClinical59424,cj1442c).  
absent0(strainClinical33084,cj1442c).  
absent0(strainClinical31481,cj1442c).  
absent0(strainClinical39828,cj1442c).  
absent0(strainClinical45557,cj1442c).  
absent0(strainClinical47939,cj1442c).  
absent0(strainChickenicken12912,cj1443c).  
absent0(strainChickenicken11818,cj1443c).  
absent0(strainClinical36439,cj1443c).  
absent0(strainClinical32787,cj1443c).  
absent0(strainClinical31467,cj1443c).  
absent0(strainClinical38762,cj1443c).  
absent0(strainCjejuniRM1221,cj1443c).  
absent0(strainClinicalG3,cj1445c).  
absent0(strainClinical32799,cj1445c).  
absent0(strainChickenicken11818,cj1445c).  
absent0(strainClinical39828,cj1445c).  
absent0(strainClinicalG1,cj1447c).  
absent0(strainClinicalG3,cj1447c).  
absent0(strainChickenicken11974,cj1447c).  
absent0(strainChickenicken13249,cj1447c).  
absent0(strainClinical33106,cj1447c).  
absent0(strainClinical38556,cj1447c).  
absent0(strainClinical39182,cj1447c).  
absent0(strainClinical44933,cj1447c).  
absent0(strainClinical45631,cj1447c).  
absent0(strainClinical55320,cj1447c).  
absent0(strainClinical41651,cj1447c).  
absent0(strainClinical32799,cj1447c).  
absent0(strainClinical43983,cj1447c).  
absent0(strainClinical40671,cj1447c).  
absent0(strainClinical44958,cj1447c).  
absent0(strainClinical52331,cj1447c).



absent0(strainClinical56281,cj1447c).  
absent0(strainClinical56282,cj1447c).  
absent0(strainClinical56832,cj1447c).  
absent0(strainOvine12241,cj1447c).  
absent0(strainOvine12481,cj1447c).  
absent0(strainBovinevineine13305,cj1447c).  
absent0(strainChickenicken11818,cj1447c).  
absent0(strainChicken12196,cj1447c).  
absent0(strainChickenicken13040,cj1447c).  
absent0(strainChickenicken11856,cj1447c).  
absent0(strainClinical36069,cj1447c).  
absent0(strainBeach1793,cj1447c).  
absent0(strainClinical36439,cj1447c).  
absent0(strainClinical56519,cj1447c).  
absent0(strainClinical32787,cj1447c).  
absent0(strainClinicall31467,cj1447c).  
absent0(strainClinical44119,cj1447c).  
absent0(strainClinical34007,cj1447c).  
absent0(strainClinical38762,cj1447c).  
absent0(strainClinicalinical15168,cj1447c).  
absent0(strainClinical18836,cj1447c).  
absent0(strainClinicalM1,cj1447c).  
absent0(strainClinical36860,cj1447c).  
absent0(strainClinical40917,cj1447c).  
absent0(strainClinical38857,cj1447c).  
absent0(strainChicken47693,cj1447c).  
absent0(strainClinical63326,cj1447c).  
absent0(strainClinical64555,cj1447c).  
absent0(strainClinical59364,cj1447c).  
absent0(strainClinical59424,cj1447c).  
absent0(strainClinical33084,cj1447c).  
absent0(strainClinical31481,cj1447c).  
absent0(strainClinical39828,cj1447c).  
absent0(strainBeach1771,cj1447c).  
absent0(strainClinical53250,cj1447c).  
absent0(strainClinical45557,cj1447c).  
absent0(strainClinical47939,cj1447c).  
absent0(strainClinicalG1,cj1448c).  
absent0(strainClinicalG3,cj1448c).  
absent0(strainChickenicken11974,cj1448c).  
absent0(strainChickenicken13249,cj1448c).  
absent0(strainClinical33106,cj1448c).  
absent0(strainClinicall38556,cj1448c).  
absent0(strainClinicall39182,cj1448c).  
absent0(strainClinical44933,cj1448c).  
absent0(strainClinical45631,cj1448c).  
absent0(strainClinical41651,cj1448c).  
absent0(strainClinical32799,cj1448c).  
absent0(strainClinical43983,cj1448c).  
absent0(strainClinical40671,cj1448c).  
absent0(strainClinical44958,cj1448c).  
absent0(strainClinical52331,cj1448c).  
absent0(strainClinical56281,cj1448c).  
absent0(strainClinical56282,cj1448c).

absent0(strainClinical56832,cj1448c).  
absent0(strainOvine12241,cj1448c).  
absent0(strainOvine12481,cj1448c).  
absent0(strainBovinevineine13305,cj1448c).  
absent0(strainChickenicken11818,cj1448c).  
absent0(strainChicken12196,cj1448c).  
absent0(strainChickenicken13040,cj1448c).  
absent0(strainChickenicken11856,cj1448c).  
absent0(strainClinical36069,cj1448c).  
absent0(strainClinical36439,cj1448c).  
absent0(strainClinical56519,cj1448c).  
absent0(strainClinical32787,cj1448c).  
absent0(strainClinicall31467,cj1448c).  
absent0(strainClinical44119,cj1448c).  
absent0(strainClinical34007,cj1448c).  
absent0(strainClinical38762,cj1448c).  
absent0(strainClinicalinical15168,cj1448c).  
absent0(strainClinical18836,cj1448c).  
absent0(strainClinicalM1,cj1448c).  
absent0(strainClinical40917,cj1448c).  
absent0(strainClinical38857,cj1448c).  
absent0(strainCjejuniRM1221,cj1448c).  
absent0(strainChicken47693,cj1448c).  
absent0(strainClinical63326,cj1448c).  
absent0(strainClinical64555,cj1448c).  
absent0(strainClinical59364,cj1448c).  
absent0(strainClinical59424,cj1448c).  
absent0(strainClinical33084,cj1448c).  
absent0(strainClinical31481,cj1448c).  
absent0(strainClinical39828,cj1448c).  
absent0(strainBeach1771,cj1448c).  
absent0(strainClinical45557,cj1448c).  
absent0(strainClinical47939,cj1448c).

```
% FILE LEARN_H_PL
% Example learning file for the reaction ?H in the paper. This is an input file
% for Progol 5.0 which loads other files in this directory into Progol and does the
% learning.
```

```
:-set(r,10)?
:-set(h,10000)?
```

```
:-['background.pl']?
:-['codes.pl']?
:-['common.pl']?
:-['CPS_pathway.pl']?
:-['glycan_structure.pl']?
:-['mutants.pl']?
:-['strains.pl']?
```

```
%%%%%%%%%%
%%%%%%%%%
```

```
unassigned_reaction(capsule_pre_pre_ribf). % reaction A
unassigned_reaction(capsule_37). % reaction B
unassigned_reaction(capsule_0). % reaction C
unassigned_reaction(capsule_22). % reaction D
unassigned_reaction(capsule_pre_pre_omepn). % reaction H
```

```
unassigned_gene(cj1416c).
%unassigned_gene(cj1417c).
%unassigned_gene(cj1418c).
```

```
%unassigned_gene(cj1432c).
%unassigned_gene(cj1434c).
%unassigned_gene(cj1438c).
%unassigned_gene(cj1440c).
%unassigned_gene(cj1442c).
```

FILE LEARN\_H\_OUT  
CProgol Version 5.0

[:- set(r,10)? - Time taken 0.00s]  
[:- set(h,10000)? - Time taken 0.00s]  
[:- modeh(1,codes(#any,#any))? - Time taken 0.00s]  
[:- observable(knockout\_observable/2)? - Time taken 0.00s]  
[Testing for contradictions]  
[No contradictions found]  
[:- [background.pl]? - Time taken 0.00s]  
[Testing for contradictions]  
[No contradictions found]  
[:- [codes.pl]? - Time taken 0.00s]  
[Testing for contradictions]  
[No contradictions found]  
[:- [common.pl]? - Time taken 0.01s]  
[Testing for contradictions]  
[No contradictions found]  
[:- [CPS\_pathway.pl]? - Time taken 0.02s]  
[Testing for contradictions]  
[No contradictions found]  
[:- [glycan\_structure.pl]? - Time taken 0.00s]  
[Testing for contradictions]  
[No contradictions found]  
[:- [mutants.pl]? - Time taken 0.00s]  
[Testing for contradictions]  
[No contradictions found]  
[:- [strains.pl]? - Time taken 0.04s]  
[Testing for contradictions]  
[No contradictions found]  
[Generalising knockout\_observable/2]  
[Generalising knockout\_observable(cj1416c,'glca6ngro+hep+6ome-galfnac-ribf').]  
[Generalising <codes(cj1416c,capsule\_pre\_pre\_omepn).>]  
[Most specific clause is]

codes(cj1416c,capsule\_pre\_pre\_omepn).

[C:1211,138,0,0 codes(cj1416c,capsule\_pre\_pre\_omepn).]  
[1 explored search nodes]  
f=1211,p=138,n=0,h=0  
[Result of search is]

codes(cj1416c,capsule\_pre\_pre\_omepn).

[Result of search is]

codes(cj1416c,capsule\_pre\_pre\_omepn).

[1 redundant clauses retracted from knockout\_observable/2]  
[130 redundant clauses retracted from occurs/2]  
[Generalising knockout\_observable(cj1417c,'glca6ngro+hep+6ome-galfnac-ribf').]  
[Generalising knockout\_observable(cj1418c,'glca6ngro+hep+6ome-galfnac-ribf').]  
[Generalising knockout\_observable(cj1421c,'glca6ngro+hep+6ome-galfnac+omepn-ribf').]

[Generalising knockout\_observable(cj1422c,'glca6ngro+hep+omepn+6ome-galfnac-ribf').]  
[Generalising knockout\_observable(cj1423c,'glca6ngro-galfnac+omepn-ribf').]  
[Generalising knockout\_observable(cj1424c,'glca6ngro-galfnac+omepn-ribf').]  
[Generalising knockout\_observable(cj1425c,'glca6ngro-galfnac+omepn-ribf').]  
[Generalising knockout\_observable(cj1426c,'glca6ngro+hep-galfnac+omepn-ribf').]  
[Generalising knockout\_observable(cj1427c,'glca6ngro-galfnac+omepn-ribf').]  
[Generalising knockout\_observable(cj1428c,'glca6ngro-galfnac+omepn-ribf').]  
[Generalising knockout\_observable(cj1430c,'glca6ngro-galfnac+omepn-ribf').]  
[Generalising knockout\_observable(cj1431c,'glca6ngro-galfnac+omepn-ribf').]  
[Generalising knockout\_observable(cj1432c,acapsular).]  
[Generalising knockout\_observable(cj1434c,acapsular).]  
[Generalising knockout\_observable(cj1435c,acapsular).]  
[Generalising knockout\_observable(cj1437c,acapsular).]  
[Generalising knockout\_observable(cj1438c,acapsular).]  
[Generalising knockout\_observable(cj1439c,acapsular).]  
[Generalising knockout\_observable(cj1440c,acapsular).]  
[Generalising knockout\_observable(cj1441c,acapsular).]  
[Generalising knockout\_observable(cj1442c,acapsular).]  
[Generalising knockout\_observable(cj1448c,acapsular).]  
knockout\_observable(Gene,Observable) :- unassigned\_gene(Gene),  
    struct\_observable(Prs\_Struct,Observable), struct\_next(Prs\_Struct,  
    Abs\_Struct), path3(R,Prs\_Struct,Abs\_Struct), unassigned\_reaction(R),  
    codes(Gene,R).

knockout\_observable(cj1417c,'glca6ngro+hep+6ome-galfnac-ribf').  
knockout\_observable(cj1418c,'glca6ngro+hep+6ome-galfnac-ribf').  
knockout\_observable(cj1421c,'glca6ngro+hep+6ome-galfnac+omepn-ribf').  
knockout\_observable(cj1422c,'glca6ngro+hep+omepn+6ome-galfnac-ribf').  
knockout\_observable(cj1423c,'glca6ngro-galfnac+omepn-ribf').  
knockout\_observable(cj1424c,'glca6ngro-galfnac+omepn-ribf').  
knockout\_observable(cj1425c,'glca6ngro-galfnac+omepn-ribf').  
knockout\_observable(cj1426c,'glca6ngro+hep-galfnac+omepn-ribf').  
knockout\_observable(cj1427c,'glca6ngro-galfnac+omepn-ribf').  
knockout\_observable(cj1428c,'glca6ngro-galfnac+omepn-ribf').  
knockout\_observable(cj1430c,'glca6ngro-galfnac+omepn-ribf').  
knockout\_observable(cj1431c,'glca6ngro-galfnac+omepn-ribf').  
knockout\_observable(cj1432c,acapsular).  
knockout\_observable(cj1434c,acapsular).  
knockout\_observable(cj1435c,acapsular).  
knockout\_observable(cj1437c,acapsular).  
knockout\_observable(cj1438c,acapsular).  
knockout\_observable(cj1439c,acapsular).  
knockout\_observable(cj1440c,acapsular).  
knockout\_observable(cj1441c,acapsular).  
knockout\_observable(cj1442c,acapsular).  
knockout\_observable(cj1448c,acapsular).

[Total number of clauses = 23]

[Time taken 0.050s]

[The following definitions changed]

codes(cj1421c,capsule\_ngo36a).

codes(cj1422c,capsule\_ngro21a).  
codes(cj1426c,capsule\_ngro21c).  
codes(cj1430c,capsule\_hep5).  
codes(cj1431c,capsule\_ngro1c).  
codes(cj1439c,capsule\_pre\_pre\_galfnac).  
codes(cj1441c,capsule\_pre\_pre\_glca).  
codes(cj1416c,capsule\_pre\_pre\_omepn).

knockout\_observable(Gene,Observable) :- unassigned\_gene(Gene),  
struct\_observable(Prs\_Struct,Observable), struct\_next(Prs\_Struct,  
Abs\_Struct), path3(R,Prs\_Struct,Abs\_Struct), unassigned\_reaction(R),  
codes(Gene,R).

knockout\_observable(cj1417c,'glca6ngro+hep+6ome-galfnac-ribf').  
knockout\_observable(cj1418c,'glca6ngro+hep+6ome-galfnac-ribf').  
knockout\_observable(cj1421c,'glca6ngro+hep+6ome-galfnac+omepn-ribf').  
knockout\_observable(cj1422c,'glca6ngro+hep+omepn+6ome-galfnac-ribf').  
knockout\_observable(cj1423c,'glca6ngro-galfnac+omepn-ribf').  
knockout\_observable(cj1424c,'glca6ngro-galfnac+omepn-ribf').  
knockout\_observable(cj1425c,'glca6ngro-galfnac+omepn-ribf').  
knockout\_observable(cj1426c,'glca6ngro+hep-galfnac+omepn-ribf').  
knockout\_observable(cj1427c,'glca6ngro-galfnac+omepn-ribf').  
knockout\_observable(cj1428c,'glca6ngro-galfnac+omepn-ribf').  
knockout\_observable(cj1430c,'glca6ngro-galfnac+omepn-ribf').  
knockout\_observable(cj1431c,'glca6ngro-galfnac+omepn-ribf').  
knockout\_observable(cj1432c,acapsular).  
knockout\_observable(cj1434c,acapsular).  
knockout\_observable(cj1435c,acapsular).  
knockout\_observable(cj1437c,acapsular).  
knockout\_observable(cj1438c,acapsular).  
knockout\_observable(cj1439c,acapsular).  
knockout\_observable(cj1440c,acapsular).  
knockout\_observable(cj1441c,acapsular).  
knockout\_observable(cj1442c,acapsular).  
knockout\_observable(cj1448c,acapsular).

occurs(Strain1,Gene) :- codes(Gene,R1), neighbour\_reaction(R1,  
R2), codes(G2,R2), occurs0(Strain2,G2), have\_same\_serotype(Strain1,  
Strain2), !.

occurs(strainClinicalG1,cj1413c).  
occurs(strainClinicalG3,cj1413c).  
occurs(strainChickenicken11974,cj1413c).  
occurs(strainChickenicken13249,cj1413c).  
occurs(strainChickenicken13411,cj1413c).  
occurs(strainClinical44811,cj1413c).  
occurs(strainClinical48612,cj1413c).  
occurs(strainClinical58473,cj1413c).  
occurs(strainChicken11848,cj1413c).  
occurs(strainChicken12567,cj1413c).  
occurs(strainChicken11919,cj1413c).  
occurs(strainChicken11973,cj1413c).  
occurs(strainChicken13713,cj1413c).  
occurs(strainBeach1791,cj1413c).  
occurs(strainClinical43205,cj1413c).  
occurs(strainClinical33106,cj1413c).

occurs(strainClinical38556,cj1413c).  
occurs(strainClinical39182,cj1413c).  
occurs(strainClinical44933,cj1413c).  
occurs(strainClinical45631,cj1413c).  
occurs(strainClinical55320,cj1413c).  
occurs(strainClinical55703,cj1413c).  
occurs(strainClinical30280,cj1413c).  
occurs(strainClinical30328,cj1413c).  
occurs(strainClinical41651,cj1413c).  
occurs(strainClinical32799,cj1413c).  
occurs(strainClinical43983,cj1413c).  
occurs(strainClinical40671,cj1413c).  
occurs(strainClinical44958,cj1413c).  
occurs(strainClinical52331,cj1413c).  
occurs(strainClinical56281,cj1413c).  
occurs(strainClinical56282,cj1413c).  
occurs(strainClinical56832,cj1413c).  
occurs(strainOvine12241,cj1413c).  
occurs(strainOvine12481,cj1413c).  
occurs(strainBovinevineine13305,cj1413c).  
occurs(strainChickenicken12912,cj1413c).  
occurs(strainChickenicken11818,cj1413c).  
occurs(strainChicken12196,cj1413c).  
occurs(strainChickenicken12450,cj1413c).  
occurs(strainChickenicken12487,cj1413c).  
occurs(strainChickenicken13082,cj1413c).  
occurs(strainChickenicken13040,cj1413c).  
occurs(strainChickenicken11856,cj1413c).  
occurs(strainClinical36069,cj1413c).  
occurs(strainChicken40209,cj1413c).  
occurs(strainBeach1793,cj1413c).  
occurs(strainClinical81116,cj1413c).  
occurs(strainClinical36439,cj1413c).  
occurs(strainClinical56519,cj1413c).  
occurs(strainClinical32787,cj1413c).  
occurs(strainClinical31467,cj1413c).  
occurs(strainClinical44119,cj1413c).  
occurs(strainClinical34007,cj1413c).  
occurs(strainClinical38762,cj1413c).  
occurs(strainClinicalinical15168,cj1413c).  
occurs(strainClinical18836,cj1413c).  
occurs(strainClinicalM1,cj1413c).  
occurs(strainClinical36860,cj1413c).  
occurs(strainClinical40917,cj1413c).  
occurs(strainClinical38857,cj1413c).  
occurs(strainCjejuniRM1221,cj1413c).  
occurs(strainChicken47693,cj1413c).  
occurs(strainClinical63326,cj1413c).  
occurs(strainClinical64555,cj1413c).  
occurs(strainClinical59364,cj1413c).  
occurs(strainClinical59424,cj1413c).  
occurs(strainClinical33084,cj1413c).  
occurs(strainClinical31481,cj1413c).  
occurs(strainClinical39828,cj1413c).

occurs(strainBeach1771,cj1413c).  
occurs(strainClinical53250,cj1413c).  
occurs(strainClinical45557,cj1413c).  
occurs(strainClinical47939,cj1413c).  
occurs(strainClinicalG1,cj1414c).  
occurs(strainChickenicken11974,cj1414c).  
occurs(strainChickenicken13249,cj1414c).  
occurs(strainChickenicken13411,cj1414c).  
occurs(strainClinical44811,cj1414c).  
occurs(strainClinical48612,cj1414c).  
occurs(strainClinical58473,cj1414c).  
occurs(strainChicken11848,cj1414c).  
occurs(strainChicken12567,cj1414c).  
occurs(strainChicken11919,cj1414c).  
occurs(strainChicken11973,cj1414c).  
occurs(strainChicken13713,cj1414c).  
occurs(strainBeach1791,cj1414c).  
occurs(strainClinical43205,cj1414c).  
occurs(strainClinical33106,cj1414c).  
occurs(strainClinical38556,cj1414c).  
occurs(strainClinical39182,cj1414c).  
occurs(strainClinical44933,cj1414c).  
occurs(strainClinical45631,cj1414c).  
occurs(strainClinical55320,cj1414c).  
occurs(strainClinical55703,cj1414c).  
occurs(strainClinical30280,cj1414c).  
occurs(strainClinical30328,cj1414c).  
occurs(strainClinical41651,cj1414c).  
occurs(strainClinical40671,cj1414c).  
occurs(strainClinical44958,cj1414c).  
occurs(strainClinical52331,cj1414c).  
occurs(strainClinical56281,cj1414c).  
occurs(strainClinical56282,cj1414c).  
occurs(strainClinical56832,cj1414c).  
occurs(strainOvine12241,cj1414c).  
occurs(strainOvine12481,cj1414c).  
occurs(strainChickenicken12912,cj1414c).  
occurs(strainChicken12196,cj1414c).  
occurs(strainChickenicken12450,cj1414c).  
occurs(strainChickenicken12487,cj1414c).  
occurs(strainChickenicken13082,cj1414c).  
occurs(strainChickenicken13040,cj1414c).  
occurs(strainChickenicken11856,cj1414c).  
occurs(strainClinical36069,cj1414c).  
occurs(strainChicken40209,cj1414c).  
occurs(strainBeach1793,cj1414c).  
occurs(strainClinical56519,cj1414c).  
occurs(strainClinical44119,cj1414c).  
occurs(strainClinical34007,cj1414c).  
occurs(strainClinicalclinical15168,cj1414c).  
occurs(strainClinical18836,cj1414c).  
occurs(strainClinical38857,cj1414c).  
occurs(strainCjejuniRM1221,cj1414c).  
occurs(strainChicken47693,cj1414c).



occurs(strainClinical63326,cj1414c).  
occurs(strainClinical64555,cj1414c).  
occurs(strainClinical59364,cj1414c).  
occurs(strainClinical59424,cj1414c).  
occurs(strainClinical33084,cj1414c).  
occurs(strainClinical31481,cj1414c).  
occurs(strainClinical39828,cj1414c).  
occurs(strainBeach1771,cj1414c).  
occurs(strainClinical53250,cj1414c).  
occurs(strainClinical45557,cj1414c).  
occurs(strainClinical47939,cj1414c).  
occurs(strainClinicalG1,cj1415c).  
occurs(strainClinicalG3,cj1415c).  
occurs(strainChickenicken11974,cj1415c).  
occurs(strainChickenicken13249,cj1415c).  
occurs(strainChickenicken13411,cj1415c).  
occurs(strainClinical44811,cj1415c).  
occurs(strainClinical48612,cj1415c).  
occurs(strainClinical58473,cj1415c).  
occurs(strainChicken11848,cj1415c).  
occurs(strainChicken12567,cj1415c).  
occurs(strainChicken11919,cj1415c).  
occurs(strainChicken11973,cj1415c).  
occurs(strainChicken13713,cj1415c).  
occurs(strainBeach1791,cj1415c).  
occurs(strainClinical43205,cj1415c).  
occurs(strainClinical33106,cj1415c).  
occurs(strainClinical55703,cj1415c).  
occurs(strainClinical30280,cj1415c).  
occurs(strainClinical30328,cj1415c).  
occurs(strainClinical41651,cj1415c).  
occurs(strainClinical32799,cj1415c).  
occurs(strainClinical43983,cj1415c).  
occurs(strainClinical40671,cj1415c).  
occurs(strainClinical44958,cj1415c).  
occurs(strainClinical52331,cj1415c).  
occurs(strainClinical56281,cj1415c).  
occurs(strainClinical56282,cj1415c).  
occurs(strainClinical56832,cj1415c).  
occurs(strainOvine12241,cj1415c).  
occurs(strainOvine12481,cj1415c).  
occurs(strainBovinevineine13305,cj1415c).  
occurs(strainChickenicken12912,cj1415c).  
occurs(strainChickenicken11818,cj1415c).  
occurs(strainChicken12196,cj1415c).  
occurs(strainChickenicken12450,cj1415c).  
occurs(strainChickenicken12487,cj1415c).  
occurs(strainChickenicken13082,cj1415c).  
occurs(strainChickenicken13040,cj1415c).  
occurs(strainChickenicken11856,cj1415c).  
occurs(strainChicken40209,cj1415c).  
occurs(strainBeach1793,cj1415c).  
occurs(strainClinical32787,cj1415c).  
occurs(strainClinical31467,cj1415c).

occurs(strainClinical38762,cj1415c).  
occurs(strainClinical15168,cj1415c).  
occurs(strainClinical18836,cj1415c).  
occurs(strainClinical38857,cj1415c).  
occurs(strainCjejuniRM1221,cj1415c).  
occurs(strainClinical33084,cj1415c).  
occurs(strainClinical31481,cj1415c).  
occurs(strainClinical39828,cj1415c).  
occurs(strainClinical45557,cj1415c).  
occurs(strainClinicalG1,cj1416c).  
occurs(strainClinicalG3,cj1416c).  
occurs(strainChickenicken13411,cj1416c).  
occurs(strainClinical33106,cj1416c).  
occurs(strainChicken40209,cj1416c).  
occurs(strainBeach1793,cj1416c).  
occurs(strainClinical81116,cj1416c).  
occurs(strainClinical32787,cj1416c).  
occurs(strainClinical31467,cj1416c).  
occurs(strainClinical38762,cj1416c).  
occurs(strainClinical15168,cj1416c).  
occurs(strainClinical18836,cj1416c).  
occurs(strainClinicalM1,cj1416c).  
occurs(strainClinical36860,cj1416c).  
occurs(strainClinical40917,cj1416c).  
occurs(strainClinical38857,cj1416c).  
occurs(strainChicken47693,cj1416c).  
occurs(strainClinical33084,cj1416c).  
occurs(strainClinical31481,cj1416c).  
occurs(strainClinical39828,cj1416c).  
occurs(strainClinical53250,cj1416c).  
occurs(strainClinical45557,cj1416c).  
occurs(strainClinicalG1,cj1417c).  
occurs(strainClinicalG3,cj1417c).  
occurs(strainChickenicken11974,cj1417c).  
occurs(strainChickenicken13249,cj1417c).  
occurs(strainChickenicken13411,cj1417c).  
occurs(strainClinical44811,cj1417c).  
occurs(strainClinical48612,cj1417c).  
occurs(strainClinical58473,cj1417c).  
occurs(strainChicken11848,cj1417c).  
occurs(strainChicken12567,cj1417c).  
occurs(strainChicken11919,cj1417c).  
occurs(strainChicken11973,cj1417c).  
occurs(strainChicken13713,cj1417c).  
occurs(strainBeach1791,cj1417c).  
occurs(strainClinical43205,cj1417c).  
occurs(strainClinical33106,cj1417c).  
occurs(strainClinical55703,cj1417c).  
occurs(strainClinical30280,cj1417c).  
occurs(strainClinical30328,cj1417c).  
occurs(strainClinical41651,cj1417c).  
occurs(strainClinical32799,cj1417c).  
occurs(strainClinical43983,cj1417c).  
occurs(strainClinical40671,cj1417c).

occurs(strainClinical44958,cj1417c).  
occurs(strainClinical52331,cj1417c).  
occurs(strainClinical56281,cj1417c).  
occurs(strainClinical56282,cj1417c).  
occurs(strainClinical56832,cj1417c).  
occurs(strainOvine12241,cj1417c).  
occurs(strainOvine12481,cj1417c).  
occurs(strainBovinevineine13305,cj1417c).  
occurs(strainChickenicken12912,cj1417c).  
occurs(strainChickenicken11818,cj1417c).  
occurs(strainChicken12196,cj1417c).  
occurs(strainChickenicken12450,cj1417c).  
occurs(strainChickenicken12487,cj1417c).  
occurs(strainChickenicken13082,cj1417c).  
occurs(strainChickenicken13040,cj1417c).  
occurs(strainChickenicken11856,cj1417c).  
occurs(strainChicken40209,cj1417c).  
occurs(strainBeach1793,cj1417c).  
occurs(strainClinical81116,cj1417c).  
occurs(strainClinical56519,cj1417c).  
occurs(strainClinical32787,cj1417c).  
occurs(strainClinical31467,cj1417c).  
occurs(strainClinical38762,cj1417c).  
occurs(strainClinicalinical15168,cj1417c).  
occurs(strainClinical18836,cj1417c).  
occurs(strainClinicalM1,cj1417c).  
occurs(strainClinical36860,cj1417c).  
occurs(strainClinical40917,cj1417c).  
occurs(strainClinical38857,cj1417c).  
occurs(strainChicken47693,cj1417c).  
occurs(strainClinical33084,cj1417c).  
occurs(strainClinical31481,cj1417c).  
occurs(strainClinical39828,cj1417c).  
occurs(strainClinical53250,cj1417c).  
occurs(strainClinical45557,cj1417c).  
occurs(strainClinicalG1,cj1418c).  
occurs(strainClinicalG3,cj1418c).  
occurs(strainChickenicken11974,cj1418c).  
occurs(strainChickenicken13249,cj1418c).  
occurs(strainChickenicken13411,cj1418c).  
occurs(strainClinical44811,cj1418c).  
occurs(strainClinical48612,cj1418c).  
occurs(strainClinical58473,cj1418c).  
occurs(strainChicken11848,cj1418c).  
occurs(strainChicken12567,cj1418c).  
occurs(strainChicken11919,cj1418c).  
occurs(strainChicken11973,cj1418c).  
occurs(strainChicken13713,cj1418c).  
occurs(strainBeach1791,cj1418c).  
occurs(strainClinical43205,cj1418c).  
occurs(strainClinical33106,cj1418c).  
occurs(strainClinical55703,cj1418c).  
occurs(strainClinical30280,cj1418c).  
occurs(strainClinical30328,cj1418c).

occurs(strainClinical41651,cj1418c).  
occurs(strainClinical32799,cj1418c).  
occurs(strainClinical43983,cj1418c).  
occurs(strainClinical40671,cj1418c).  
occurs(strainClinical44958,cj1418c).  
occurs(strainClinical52331,cj1418c).  
occurs(strainClinical56281,cj1418c).  
occurs(strainClinical56282,cj1418c).  
occurs(strainClinical56832,cj1418c).  
occurs(strainOvine12241,cj1418c).  
occurs(strainOvine12481,cj1418c).  
occurs(strainBovinevineine13305,cj1418c).  
occurs(strainChickenicken12912,cj1418c).  
occurs(strainChickenicken11818,cj1418c).  
occurs(strainChicken12196,cj1418c).  
occurs(strainChickenicken12450,cj1418c).  
occurs(strainChickenicken12487,cj1418c).  
occurs(strainChickenicken13082,cj1418c).  
occurs(strainChickenicken13040,cj1418c).  
occurs(strainChickenicken11856,cj1418c).  
occurs(strainChicken40209,cj1418c).  
occurs(strainBeach1793,cj1418c).  
occurs(strainClinical81116,cj1418c).  
occurs(strainClinical56519,cj1418c).  
occurs(strainClinical32787,cj1418c).  
occurs(strainClinical31467,cj1418c).  
occurs(strainClinical38762,cj1418c).  
occurs(strainClinicalinical15168,cj1418c).  
occurs(strainClinical18836,cj1418c).  
occurs(strainClinicalM1,cj1418c).  
occurs(strainClinical36860,cj1418c).  
occurs(strainClinical40917,cj1418c).  
occurs(strainClinical38857,cj1418c).  
occurs(strainChicken47693,cj1418c).  
occurs(strainClinical33084,cj1418c).  
occurs(strainClinical31481,cj1418c).  
occurs(strainClinical39828,cj1418c).  
occurs(strainClinical53250,cj1418c).  
occurs(strainClinical45557,cj1418c).  
occurs(strainClinicalG1,cj1419c).  
occurs(strainClinicalG3,cj1419c).  
occurs(strainChickenicken11974,cj1419c).  
occurs(strainChickenicken13249,cj1419c).  
occurs(strainChickenicken13411,cj1419c).  
occurs(strainClinical44811,cj1419c).  
occurs(strainClinical48612,cj1419c).  
occurs(strainClinical58473,cj1419c).  
occurs(strainChicken11848,cj1419c).  
occurs(strainChicken12567,cj1419c).  
occurs(strainChicken11919,cj1419c).  
occurs(strainChicken11973,cj1419c).  
occurs(strainChicken13713,cj1419c).  
occurs(strainBeach1791,cj1419c).  
occurs(strainClinical43205,cj1419c).

occurs(strainClinical33106,cj1419c).  
occurs(strainClinical55703,cj1419c).  
occurs(strainClinical30280,cj1419c).  
occurs(strainClinical30328,cj1419c).  
occurs(strainClinical41651,cj1419c).  
occurs(strainClinical32799,cj1419c).  
occurs(strainClinical43983,cj1419c).  
occurs(strainClinical40671,cj1419c).  
occurs(strainClinical44958,cj1419c).  
occurs(strainClinical52331,cj1419c).  
occurs(strainClinical56281,cj1419c).  
occurs(strainClinical56282,cj1419c).  
occurs(strainClinical56832,cj1419c).  
occurs(strainOvine12241,cj1419c).  
occurs(strainOvine12481,cj1419c).  
occurs(strainBovinevineine13305,cj1419c).  
occurs(strainChickenicken12912,cj1419c).  
occurs(strainChickenicken11818,cj1419c).  
occurs(strainChicken12196,cj1419c).  
occurs(strainChickenicken12450,cj1419c).  
occurs(strainChickenicken12487,cj1419c).  
occurs(strainChickenicken13082,cj1419c).  
occurs(strainChickenicken13040,cj1419c).  
occurs(strainChickenicken11856,cj1419c).  
occurs(strainChicken40209,cj1419c).  
occurs(strainBeach1793,cj1419c).  
occurs(strainClinical81116,cj1419c).  
occurs(strainClinical56519,cj1419c).  
occurs(strainClinical32787,cj1419c).  
occurs(strainClinical31467,cj1419c).  
occurs(strainClinical38762,cj1419c).  
occurs(strainClinicalinical15168,cj1419c).  
occurs(strainClinical18836,cj1419c).  
occurs(strainClinicalM1,cj1419c).  
occurs(strainClinical36860,cj1419c).  
occurs(strainClinical40917,cj1419c).  
occurs(strainClinical38857,cj1419c).  
occurs(strainChicken47693,cj1419c).  
occurs(strainClinical33084,cj1419c).  
occurs(strainClinical31481,cj1419c).  
occurs(strainClinical39828,cj1419c).  
occurs(strainClinical53250,cj1419c).  
occurs(strainClinical45557,cj1419c).  
occurs(strainCjejuniRM1221,cj1421c).  
occurs(strainChickenicken13411,cj1423c).  
occurs(strainClinical44811,cj1423c).  
occurs(strainClinical48612,cj1423c).  
occurs(strainChicken11848,cj1423c).  
occurs(strainChicken12567,cj1423c).  
occurs(strainChicken11919,cj1423c).  
occurs(strainChicken11973,cj1423c).  
occurs(strainChicken13713,cj1423c).  
occurs(strainBeach1791,cj1423c).  
occurs(strainClinical43205,cj1423c).

occurs(strainClinical55320,cj1423c).  
occurs(strainClinical55703,cj1423c).  
occurs(strainClinical30280,cj1423c).  
occurs(strainClinical30328,cj1423c).  
occurs(strainClinical41651,cj1423c).  
occurs(strainClinical44958,cj1423c).  
occurs(strainClinical56281,cj1423c).  
occurs(strainClinical56282,cj1423c).  
occurs(strainChickenicken12450,cj1423c).  
occurs(strainChickenicken12487,cj1423c).  
occurs(strainChickenicken13082,cj1423c).  
occurs(strainBeach1793,cj1423c).  
occurs(strainClinical33084,cj1423c).  
occurs(strainClinical53250,cj1423c).  
occurs(strainChickenicken13411,cj1424c).  
occurs(strainClinical44811,cj1424c).  
occurs(strainClinical48612,cj1424c).  
occurs(strainChicken11848,cj1424c).  
occurs(strainChicken12567,cj1424c).  
occurs(strainChicken11919,cj1424c).  
occurs(strainChicken11973,cj1424c).  
occurs(strainChicken13713,cj1424c).  
occurs(strainBeach1791,cj1424c).  
occurs(strainClinical43205,cj1424c).  
occurs(strainClinical38556,cj1424c).  
occurs(strainClinical39182,cj1424c).  
occurs(strainClinical45631,cj1424c).  
occurs(strainClinical55320,cj1424c).  
occurs(strainClinical55703,cj1424c).  
occurs(strainClinical30280,cj1424c).  
occurs(strainClinical30328,cj1424c).  
occurs(strainClinical41651,cj1424c).  
occurs(strainClinical43983,cj1424c).  
occurs(strainClinical40671,cj1424c).  
occurs(strainClinical56282,cj1424c).  
occurs(strainOvine12241,cj1424c).  
occurs(strainOvine12481,cj1424c).  
occurs(strainBovinevineine13305,cj1424c).  
occurs(strainChickenicken12450,cj1424c).  
occurs(strainChickenicken12487,cj1424c).  
occurs(strainChickenicken13082,cj1424c).  
occurs(strainChickenicken11856,cj1424c).  
occurs(strainClinical36069,cj1424c).  
occurs(strainClinical32787,cj1424c).  
occurs(strainClinical31467,cj1424c).  
occurs(strainClinical44119,cj1424c).  
occurs(strainClinical34007,cj1424c).  
occurs(strainClinical38762,cj1424c).  
occurs(strainClinical38857,cj1424c).  
occurs(strainChicken47693,cj1424c).  
occurs(strainClinical63326,cj1424c).  
occurs(strainClinical64555,cj1424c).  
occurs(strainClinical59364,cj1424c).  
occurs(strainClinical59424,cj1424c).

occurs(strainClinical33084,cj1424c).  
occurs(strainClinical31481,cj1424c).  
occurs(strainBeach1771,cj1424c).  
occurs(strainClinical53250,cj1424c).  
occurs(strainChickenicken13411,cj1425c).  
occurs(strainClinical44811,cj1425c).  
occurs(strainClinical48612,cj1425c).  
occurs(strainClinical58473,cj1425c).  
occurs(strainChicken11848,cj1425c).  
occurs(strainChicken12567,cj1425c).  
occurs(strainChicken11919,cj1425c).  
occurs(strainChicken11973,cj1425c).  
occurs(strainChicken13713,cj1425c).  
occurs(strainBeach1791,cj1425c).  
occurs(strainClinical43205,cj1425c).  
occurs(strainClinical33106,cj1425c).  
occurs(strainClinical44933,cj1425c).  
occurs(strainClinical55320,cj1425c).  
occurs(strainClinical55703,cj1425c).  
occurs(strainClinical30280,cj1425c).  
occurs(strainClinical30328,cj1425c).  
occurs(strainClinical41651,cj1425c).  
occurs(strainClinical43983,cj1425c).  
occurs(strainClinical40671,cj1425c).  
occurs(strainClinical44958,cj1425c).  
occurs(strainClinical56281,cj1425c).  
occurs(strainClinical56282,cj1425c).  
occurs(strainClinical56832,cj1425c).  
occurs(strainOvine12241,cj1425c).  
occurs(strainChicken12196,cj1425c).  
occurs(strainChickenicken12450,cj1425c).  
occurs(strainChickenicken12487,cj1425c).  
occurs(strainChickenicken13082,cj1425c).  
occurs(strainChickenicken13040,cj1425c).  
occurs(strainChickenicken11856,cj1425c).  
occurs(strainBeach1793,cj1425c).  
occurs(strainClinical56519,cj1425c).  
occurs(strainClinical31467,cj1425c).  
occurs(strainClinical38857,cj1425c).  
occurs(strainChicken47693,cj1425c).  
occurs(strainClinical64555,cj1425c).  
occurs(strainClinical31481,cj1425c).  
occurs(strainBeach1771,cj1425c).  
occurs(strainClinical53250,cj1425c).  
occurs(strainChickenicken13411,cj1426c).  
occurs(strainCjejuniRM1221,cj1426c).  
occurs(strainChickenicken13411,cj1427c).  
occurs(strainClinical44811,cj1427c).  
occurs(strainClinical48612,cj1427c).  
occurs(strainChicken11848,cj1427c).  
occurs(strainChicken12567,cj1427c).  
occurs(strainChicken11919,cj1427c).  
occurs(strainChicken11973,cj1427c).  
occurs(strainChicken13713,cj1427c).

occurs(strainBeach1791,cj1427c).  
occurs(strainClinical43205,cj1427c).  
occurs(strainClinical33106,cj1427c).  
occurs(strainClinical55703,cj1427c).  
occurs(strainClinical30280,cj1427c).  
occurs(strainClinical30328,cj1427c).  
occurs(strainClinical43983,cj1427c).  
occurs(strainClinical40671,cj1427c).  
occurs(strainOvine12241,cj1427c).  
occurs(strainOvine12481,cj1427c).  
occurs(strainBovinevineine13305,cj1427c).  
occurs(strainChickenicken12450,cj1427c).  
occurs(strainChickenicken12487,cj1427c).  
occurs(strainChickenicken13082,cj1427c).  
occurs(strainClinical33084,cj1427c).  
occurs(strainChickenicken13411,cj1428c).  
occurs(strainClinical44811,cj1428c).  
occurs(strainClinical48612,cj1428c).  
occurs(strainChicken11848,cj1428c).  
occurs(strainChicken12567,cj1428c).  
occurs(strainChicken11919,cj1428c).  
occurs(strainChicken11973,cj1428c).  
occurs(strainChicken13713,cj1428c).  
occurs(strainBeach1791,cj1428c).  
occurs(strainClinical55703,cj1428c).  
occurs(strainClinical30280,cj1428c).  
occurs(strainClinical30328,cj1428c).  
occurs(strainChickenicken12450,cj1428c).  
occurs(strainChickenicken12487,cj1428c).  
occurs(strainChickenicken13082,cj1428c).  
occurs(strainBeach1793,cj1428c).  
occurs(strainChickenicken13411,cj1429c).  
occurs(strainClinical44811,cj1429c).  
occurs(strainClinical48612,cj1429c).  
occurs(strainChicken11848,cj1429c).  
occurs(strainChicken12567,cj1429c).  
occurs(strainChicken11919,cj1429c).  
occurs(strainChicken11973,cj1429c).  
occurs(strainChicken13713,cj1429c).  
occurs(strainBeach1791,cj1429c).  
occurs(strainClinical55703,cj1429c).  
occurs(strainClinical30280,cj1429c).  
occurs(strainClinical30328,cj1429c).  
occurs(strainChickenicken12450,cj1429c).  
occurs(strainChickenicken12487,cj1429c).  
occurs(strainChickenicken13082,cj1429c).  
occurs(strainBeach1793,cj1429c).  
occurs(strainClinical38857,cj1429c).  
occurs(strainChickenicken13411,cj1430c).  
occurs(strainClinical44811,cj1430c).  
occurs(strainClinical48612,cj1430c).  
occurs(strainChicken11848,cj1430c).  
occurs(strainChicken12567,cj1430c).  
occurs(strainChicken11919,cj1430c).



occurs(strainChicken11973,cj1430c).  
occurs(strainChicken13713,cj1430c).  
occurs(strainBeach1791,cj1430c).  
occurs(strainClinical55320,cj1430c).  
occurs(strainClinical55703,cj1430c).  
occurs(strainClinical30280,cj1430c).  
occurs(strainClinical30328,cj1430c).  
occurs(strainChickenicken12450,cj1430c).  
occurs(strainChickenicken12487,cj1430c).  
occurs(strainChickenicken13082,cj1430c).  
occurs(strainBeach1793,cj1430c).  
occurs(strainChickenicken13411,cj1431c).  
occurs(strainChicken40209,cj1431c).  
occurs(strainChickenicken13411,cj1432c).  
occurs(strainClinical44811,cj1432c).  
occurs(strainClinical48612,cj1432c).  
occurs(strainChicken11848,cj1432c).  
occurs(strainChicken12567,cj1432c).  
occurs(strainChicken11919,cj1432c).  
occurs(strainChicken11973,cj1432c).  
occurs(strainChicken13713,cj1432c).  
occurs(strainBeach1791,cj1432c).  
occurs(strainClinical55320,cj1432c).  
occurs(strainClinical55703,cj1432c).  
occurs(strainClinical30280,cj1432c).  
occurs(strainClinical30328,cj1432c).  
occurs(strainChickenicken12450,cj1432c).  
occurs(strainChickenicken12487,cj1432c).  
occurs(strainChickenicken13082,cj1432c).  
occurs(strainChickenicken13411,cj1433c).  
occurs(strainClinical44811,cj1433c).  
occurs(strainClinical48612,cj1433c).  
occurs(strainChicken11848,cj1433c).  
occurs(strainChicken12567,cj1433c).  
occurs(strainChicken11919,cj1433c).  
occurs(strainChicken11973,cj1433c).  
occurs(strainChicken13713,cj1433c).  
occurs(strainBeach1791,cj1433c).  
occurs(strainClinical55320,cj1433c).  
occurs(strainClinical55703,cj1433c).  
occurs(strainClinical30280,cj1433c).  
occurs(strainClinical30328,cj1433c).  
occurs(strainClinical43983,cj1433c).  
occurs(strainChickenicken12450,cj1433c).  
occurs(strainChickenicken12487,cj1433c).  
occurs(strainChickenicken13082,cj1433c).  
occurs(strainChickenicken13411,cj1434c).  
occurs(strainClinical44811,cj1434c).  
occurs(strainClinical48612,cj1434c).  
occurs(strainChicken11848,cj1434c).  
occurs(strainChicken11919,cj1434c).  
occurs(strainChicken11973,cj1434c).  
occurs(strainChicken13713,cj1434c).  
occurs(strainBeach1791,cj1434c).

occurs(strainClinical55703,cj1434c).  
occurs(strainClinical30280,cj1434c).  
occurs(strainClinical30328,cj1434c).  
occurs(strainChickenicken12450,cj1434c).  
occurs(strainChickenicken12487,cj1434c).  
occurs(strainChickenicken13082,cj1434c).  
occurs(strainChickenicken13411,cj1435c).  
occurs(strainClinical44811,cj1435c).  
occurs(strainClinical48612,cj1435c).  
occurs(strainChicken11848,cj1435c).  
occurs(strainChicken12567,cj1435c).  
occurs(strainChicken11919,cj1435c).  
occurs(strainChicken11973,cj1435c).  
occurs(strainChicken13713,cj1435c).  
occurs(strainBeach1791,cj1435c).  
occurs(strainClinical55703,cj1435c).  
occurs(strainClinical30280,cj1435c).  
occurs(strainClinical30328,cj1435c).  
occurs(strainClinical43983,cj1435c).  
occurs(strainChickenicken12450,cj1435c).  
occurs(strainChickenicken12487,cj1435c).  
occurs(strainChickenicken13082,cj1435c).  
occurs(strainClinical36439,cj1435c).  
occurs(strainChickenicken13411,cj1436c).  
occurs(strainClinical44811,cj1436c).  
occurs(strainClinical48612,cj1436c).  
occurs(strainChicken11848,cj1436c).  
occurs(strainChicken12567,cj1436c).  
occurs(strainChicken11919,cj1436c).  
occurs(strainChicken11973,cj1436c).  
occurs(strainChicken13713,cj1436c).  
occurs(strainBeach1791,cj1436c).  
occurs(strainClinical55320,cj1436c).  
occurs(strainClinical55703,cj1436c).  
occurs(strainClinical30280,cj1436c).  
occurs(strainClinical30328,cj1436c).  
occurs(strainChickenicken12450,cj1436c).  
occurs(strainChickenicken12487,cj1436c).  
occurs(strainChickenicken13082,cj1436c).  
occurs(strainChickenicken13411,cj1437c).  
occurs(strainClinical44811,cj1437c).  
occurs(strainClinical48612,cj1437c).  
occurs(strainChicken11848,cj1437c).  
occurs(strainChicken12567,cj1437c).  
occurs(strainChicken11919,cj1437c).  
occurs(strainChicken11973,cj1437c).  
occurs(strainChicken13713,cj1437c).  
occurs(strainBeach1791,cj1437c).  
occurs(strainClinical55703,cj1437c).  
occurs(strainClinical30280,cj1437c).  
occurs(strainClinical30328,cj1437c).  
occurs(strainChickenicken12450,cj1437c).  
occurs(strainChickenicken12487,cj1437c).  
occurs(strainChickenicken13082,cj1437c).

occurs(strainChickenicken13411,cj1438c).  
occurs(strainClinical44811,cj1438c).  
occurs(strainClinical48612,cj1438c).  
occurs(strainChicken11848,cj1438c).  
occurs(strainChicken12567,cj1438c).  
occurs(strainChicken11919,cj1438c).  
occurs(strainChicken11973,cj1438c).  
occurs(strainChicken13713,cj1438c).  
occurs(strainBeach1791,cj1438c).  
occurs(strainClinical55703,cj1438c).  
occurs(strainClinical30280,cj1438c).  
occurs(strainClinical30328,cj1438c).  
occurs(strainChickenicken12450,cj1438c).  
occurs(strainChickenicken12487,cj1438c).  
occurs(strainChickenicken13082,cj1438c).  
occurs(strainChickenicken13411,cj1440c).  
occurs(strainClinical44811,cj1440c).  
occurs(strainClinical48612,cj1440c).  
occurs(strainChicken11848,cj1440c).  
occurs(strainChicken12567,cj1440c).  
occurs(strainChicken11919,cj1440c).  
occurs(strainChicken11973,cj1440c).  
occurs(strainChicken13713,cj1440c).  
occurs(strainBeach1791,cj1440c).  
occurs(strainClinical55320,cj1440c).  
occurs(strainClinical55703,cj1440c).  
occurs(strainClinical30280,cj1440c).  
occurs(strainClinical30328,cj1440c).  
occurs(strainClinical56281,cj1440c).  
occurs(strainChickenicken12450,cj1440c).  
occurs(strainChickenicken12487,cj1440c).  
occurs(strainChickenicken13082,cj1440c).  
occurs(strainChickenicken13411,cj1441c).  
occurs(strainChickenicken13411,cj1442c).  
occurs(strainClinical44811,cj1442c).  
occurs(strainClinical48612,cj1442c).  
occurs(strainClinical58473,cj1442c).  
occurs(strainChicken11848,cj1442c).  
occurs(strainChicken12567,cj1442c).  
occurs(strainChicken11919,cj1442c).  
occurs(strainChicken11973,cj1442c).  
occurs(strainChicken13713,cj1442c).  
occurs(strainBeach1791,cj1442c).  
occurs(strainClinical43205,cj1442c).  
occurs(strainClinical55703,cj1442c).  
occurs(strainClinical30280,cj1442c).  
occurs(strainClinical30328,cj1442c).  
occurs(strainClinical41651,cj1442c).  
occurs(strainClinical43983,cj1442c).  
occurs(strainClinical40671,cj1442c).  
occurs(strainClinical44958,cj1442c).  
occurs(strainClinical52331,cj1442c).  
occurs(strainClinical56281,cj1442c).  
occurs(strainClinical56282,cj1442c).

occurs(strainOvine12241,cj1442c).  
occurs(strainOvine12481,cj1442c).  
occurs(strainBovinevineine13305,cj1442c).  
occurs(strainChickenicken11818,cj1442c).  
occurs(strainChicken12196,cj1442c).  
occurs(strainChickenicken12450,cj1442c).  
occurs(strainChickenicken12487,cj1442c).  
occurs(strainChickenicken13082,cj1442c).  
occurs(strainChickenicken13040,cj1442c).  
occurs(strainChickenicken11856,cj1442c).  
occurs(strainClinical56519,cj1442c).  
occurs(strainChicken47693,cj1442c).  
occurs(strainBeach1771,cj1442c).  
occurs(strainClinical53250,cj1442c).  
occurs(strainClinicalG1,cj1443c).  
occurs(strainClinicalG3,cj1443c).  
occurs(strainChickenicken11974,cj1443c).  
occurs(strainChickenicken13249,cj1443c).  
occurs(strainChickenicken13411,cj1443c).  
occurs(strainClinical44811,cj1443c).  
occurs(strainClinical48612,cj1443c).  
occurs(strainClinical58473,cj1443c).  
occurs(strainChicken11848,cj1443c).  
occurs(strainChicken12567,cj1443c).  
occurs(strainChicken11919,cj1443c).  
occurs(strainChicken11973,cj1443c).  
occurs(strainChicken13713,cj1443c).  
occurs(strainBeach1791,cj1443c).  
occurs(strainClinical43205,cj1443c).  
occurs(strainClinical33106,cj1443c).  
occurs(strainClinical38556,cj1443c).  
occurs(strainClinical39182,cj1443c).  
occurs(strainClinical44933,cj1443c).  
occurs(strainClinical45631,cj1443c).  
occurs(strainClinical55320,cj1443c).  
occurs(strainClinical55703,cj1443c).  
occurs(strainClinical30280,cj1443c).  
occurs(strainClinical30328,cj1443c).  
occurs(strainClinical41651,cj1443c).  
occurs(strainClinical32799,cj1443c).  
occurs(strainClinical43983,cj1443c).  
occurs(strainClinical40671,cj1443c).  
occurs(strainClinical44958,cj1443c).  
occurs(strainClinical52331,cj1443c).  
occurs(strainClinical56281,cj1443c).  
occurs(strainClinical56282,cj1443c).  
occurs(strainClinical56832,cj1443c).  
occurs(strainOvine12241,cj1443c).  
occurs(strainOvine12481,cj1443c).  
occurs(strainBovinevineine13305,cj1443c).  
occurs(strainChicken12196,cj1443c).  
occurs(strainChickenicken12450,cj1443c).  
occurs(strainChickenicken12487,cj1443c).  
occurs(strainChickenicken13082,cj1443c).

occurs(strainChickenicken13040,cj1443c).  
occurs(strainChickenicken11856,cj1443c).  
occurs(strainClinical36069,cj1443c).  
occurs(strainChicken40209,cj1443c).  
occurs(strainBeach1793,cj1443c).  
occurs(strainClinical81116,cj1443c).  
occurs(strainClinical56519,cj1443c).  
occurs(strainClinical44119,cj1443c).  
occurs(strainClinical34007,cj1443c).  
occurs(strainClinicalclinical15168,cj1443c).  
occurs(strainClinical18836,cj1443c).  
occurs(strainClinicalM1,cj1443c).  
occurs(strainClinical36860,cj1443c).  
occurs(strainClinical40917,cj1443c).  
occurs(strainClinical38857,cj1443c).  
occurs(strainChicken47693,cj1443c).  
occurs(strainClinical63326,cj1443c).  
occurs(strainClinical64555,cj1443c).  
occurs(strainClinical59364,cj1443c).  
occurs(strainClinical59424,cj1443c).  
occurs(strainClinical33084,cj1443c).  
occurs(strainClinical31481,cj1443c).  
occurs(strainClinical39828,cj1443c).  
occurs(strainBeach1771,cj1443c).  
occurs(strainClinical53250,cj1443c).  
occurs(strainClinical45557,cj1443c).  
occurs(strainClinical47939,cj1443c).  
occurs(strainClinicalG1,cj1444c).  
occurs(strainClinicalG3,cj1444c).  
occurs(strainChickenicken11974,cj1444c).  
occurs(strainChickenicken13249,cj1444c).  
occurs(strainChickenicken13411,cj1444c).  
occurs(strainClinical44811,cj1444c).  
occurs(strainClinical48612,cj1444c).  
occurs(strainClinical58473,cj1444c).  
occurs(strainChicken11848,cj1444c).  
occurs(strainChicken12567,cj1444c).  
occurs(strainChicken11919,cj1444c).  
occurs(strainChicken11973,cj1444c).  
occurs(strainChicken13713,cj1444c).  
occurs(strainBeach1791,cj1444c).  
occurs(strainClinical43205,cj1444c).  
occurs(strainClinical33106,cj1444c).  
occurs(strainClinical38556,cj1444c).  
occurs(strainClinical39182,cj1444c).  
occurs(strainClinical44933,cj1444c).  
occurs(strainClinical45631,cj1444c).  
occurs(strainClinical55320,cj1444c).  
occurs(strainClinical55703,cj1444c).  
occurs(strainClinical30280,cj1444c).  
occurs(strainClinical30328,cj1444c).  
occurs(strainClinical41651,cj1444c).  
occurs(strainClinical32799,cj1444c).  
occurs(strainClinical43983,cj1444c).

occurs(strainClinical40671,cj1444c).  
occurs(strainClinical44958,cj1444c).  
occurs(strainClinical52331,cj1444c).  
occurs(strainClinical56281,cj1444c).  
occurs(strainClinical56282,cj1444c).  
occurs(strainClinical56832,cj1444c).  
occurs(strainOvine12241,cj1444c).  
occurs(strainOvine12481,cj1444c).  
occurs(strainBovinevineine13305,cj1444c).  
occurs(strainChickenicken12912,cj1444c).  
occurs(strainChickenicken11818,cj1444c).  
occurs(strainChicken12196,cj1444c).  
occurs(strainChickenicken12450,cj1444c).  
occurs(strainChickenicken12487,cj1444c).  
occurs(strainChickenicken13082,cj1444c).  
occurs(strainChickenicken13040,cj1444c).  
occurs(strainChickenicken11856,cj1444c).  
occurs(strainClinical36069,cj1444c).  
occurs(strainChicken40209,cj1444c).  
occurs(strainBeach1793,cj1444c).  
occurs(strainClinical81116,cj1444c).  
occurs(strainClinical36439,cj1444c).  
occurs(strainClinical56519,cj1444c).  
occurs(strainClinical32787,cj1444c).  
occurs(strainClinical31467,cj1444c).  
occurs(strainClinical44119,cj1444c).  
occurs(strainClinical34007,cj1444c).  
occurs(strainClinical38762,cj1444c).  
occurs(strainClinicalinical15168,cj1444c).  
occurs(strainClinical18836,cj1444c).  
occurs(strainClinicalM1,cj1444c).  
occurs(strainClinical36860,cj1444c).  
occurs(strainClinical40917,cj1444c).  
occurs(strainClinical38857,cj1444c).  
occurs(strainCjejuniRM1221,cj1444c).  
occurs(strainChicken47693,cj1444c).  
occurs(strainClinical63326,cj1444c).  
occurs(strainClinical64555,cj1444c).  
occurs(strainClinical59364,cj1444c).  
occurs(strainClinical59424,cj1444c).  
occurs(strainClinical33084,cj1444c).  
occurs(strainClinical31481,cj1444c).  
occurs(strainClinical39828,cj1444c).  
occurs(strainBeach1771,cj1444c).  
occurs(strainClinical53250,cj1444c).  
occurs(strainClinical45557,cj1444c).  
occurs(strainClinical47939,cj1444c).  
occurs(strainClinicalG1,cj1445c).  
occurs(strainChickenicken11974,cj1445c).  
occurs(strainChickenicken13249,cj1445c).  
occurs(strainChickenicken13411,cj1445c).  
occurs(strainClinical44811,cj1445c).  
occurs(strainClinical48612,cj1445c).  
occurs(strainClinical58473,cj1445c).

occurs(strainChicken11848,cj1445c).  
occurs(strainChicken12567,cj1445c).  
occurs(strainChicken11919,cj1445c).  
occurs(strainChicken11973,cj1445c).  
occurs(strainChicken13713,cj1445c).  
occurs(strainBeach1791,cj1445c).  
occurs(strainClinical43205,cj1445c).  
occurs(strainClinical33106,cj1445c).  
occurs(strainClinical38556,cj1445c).  
occurs(strainClinical39182,cj1445c).  
occurs(strainClinical44933,cj1445c).  
occurs(strainClinical45631,cj1445c).  
occurs(strainClinical55320,cj1445c).  
occurs(strainClinical55703,cj1445c).  
occurs(strainClinical30280,cj1445c).  
occurs(strainClinical30328,cj1445c).  
occurs(strainClinical41651,cj1445c).  
occurs(strainClinical43983,cj1445c).  
occurs(strainClinical40671,cj1445c).  
occurs(strainClinical44958,cj1445c).  
occurs(strainClinical52331,cj1445c).  
occurs(strainClinical56281,cj1445c).  
occurs(strainClinical56282,cj1445c).  
occurs(strainClinical56832,cj1445c).  
occurs(strainOvine12241,cj1445c).  
occurs(strainOvine12481,cj1445c).  
occurs(strainBovinevineine13305,cj1445c).  
occurs(strainChickenicken12912,cj1445c).  
occurs(strainChicken12196,cj1445c).  
occurs(strainChickenicken12450,cj1445c).  
occurs(strainChickenicken12487,cj1445c).  
occurs(strainChickenicken13082,cj1445c).  
occurs(strainChickenicken13040,cj1445c).  
occurs(strainChickenicken11856,cj1445c).  
occurs(strainClinical36069,cj1445c).  
occurs(strainChicken40209,cj1445c).  
occurs(strainBeach1793,cj1445c).  
occurs(strainClinical81116,cj1445c).  
occurs(strainClinical36439,cj1445c).  
occurs(strainClinical56519,cj1445c).  
occurs(strainClinical32787,cj1445c).  
occurs(strainClinical31467,cj1445c).  
occurs(strainClinical44119,cj1445c).  
occurs(strainClinical34007,cj1445c).  
occurs(strainClinical38762,cj1445c).  
occurs(strainClinicalclinical15168,cj1445c).  
occurs(strainClinical18836,cj1445c).  
occurs(strainClinicalM1,cj1445c).  
occurs(strainClinical36860,cj1445c).  
occurs(strainClinical40917,cj1445c).  
occurs(strainClinical38857,cj1445c).  
occurs(strainCjejuniRM1221,cj1445c).  
occurs(strainChicken47693,cj1445c).  
occurs(strainClinical63326,cj1445c).

occurs(strainClinical64555,cj1445c).  
occurs(strainClinical59364,cj1445c).  
occurs(strainClinical59424,cj1445c).  
occurs(strainClinical33084,cj1445c).  
occurs(strainClinical31481,cj1445c).  
occurs(strainBeach1771,cj1445c).  
occurs(strainClinical53250,cj1445c).  
occurs(strainClinical45557,cj1445c).  
occurs(strainClinical47939,cj1445c).  
occurs(strainChickenicken13411,cj1447c).  
occurs(strainClinical44811,cj1447c).  
occurs(strainClinical48612,cj1447c).  
occurs(strainClinical58473,cj1447c).  
occurs(strainChicken11848,cj1447c).  
occurs(strainChicken12567,cj1447c).  
occurs(strainChicken11919,cj1447c).  
occurs(strainChicken11973,cj1447c).  
occurs(strainChicken13713,cj1447c).  
occurs(strainBeach1791,cj1447c).  
occurs(strainClinical43205,cj1447c).  
occurs(strainClinical55703,cj1447c).  
occurs(strainClinical30280,cj1447c).  
occurs(strainClinical30328,cj1447c).  
occurs(strainChickenicken12912,cj1447c).  
occurs(strainChickenicken12450,cj1447c).  
occurs(strainChickenicken12487,cj1447c).  
occurs(strainChickenicken13082,cj1447c).  
occurs(strainChicken40209,cj1447c).  
occurs(strainClinical81116,cj1447c).  
occurs(strainCjejuniRM1221,cj1447c).  
occurs(strainChickenicken13411,cj1448c).  
occurs(strainClinical44811,cj1448c).  
occurs(strainClinical48612,cj1448c).  
occurs(strainClinical58473,cj1448c).  
occurs(strainChicken11848,cj1448c).  
occurs(strainChicken12567,cj1448c).  
occurs(strainChicken11919,cj1448c).  
occurs(strainChicken11973,cj1448c).  
occurs(strainChicken13713,cj1448c).  
occurs(strainBeach1791,cj1448c).  
occurs(strainClinical43205,cj1448c).  
occurs(strainClinical55320,cj1448c).  
occurs(strainClinical55703,cj1448c).  
occurs(strainClinical30280,cj1448c).  
occurs(strainClinical30328,cj1448c).  
occurs(strainChickenicken12912,cj1448c).  
occurs(strainChickenicken12450,cj1448c).  
occurs(strainChickenicken12487,cj1448c).  
occurs(strainChickenicken13082,cj1448c).  
occurs(strainChicken40209,cj1448c).  
occurs(strainBeach1793,cj1448c).  
occurs(strainClinical81116,cj1448c).  
occurs(strainClinical36860,cj1448c).  
occurs(strainClinical53250,cj1448c).



[Total time taken 0.050s]
